# Supplementary material for: Skeletal rearrangement of 6,8-dioxabicyclo[3.2.1]octan-4-ols promoted by thionyl chloride or Appel conditions
Source: publisher site journal article supplement (doi:10.3762/bjoc.20.74), 2024-04-16
Supplement: Additional file 1 [file 1860-5397-20-74-S1.pdf]

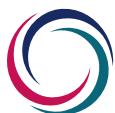

## Supporting Information

for

### **Skeletal rearrangement of 6,8-dioxabicyclo[3.2.1]octan-4-ols promoted by thionyl chloride or Appel conditions**

Martyn Jevric, Julian Klepp, Johannes Puschnig, Oscar Lamb, Christopher J. Sumby and Ben W. Greatrex

*Beilstein J. Org. Chem.* **2024**, *20*, 823–829. doi:10.3762/bjoc.20.74

### **Experimental details, X-ray crystallography and spectra**

## Table of contents

|                                                                                    |     |
|------------------------------------------------------------------------------------|-----|
| Table of contents.....                                                             | S1  |
| General experimental.....                                                          | S2  |
| Preparation of alcohols <b>10d–f</b> .....                                         | S2  |
| Representative procedure for the rearrangement reaction to give <b>11a–f</b> ..... | S5  |
| Representative procedure for the formation of alcohols <b>12a,c–f</b> . ....       | S8  |
| Reactions of alcohol <b>18</b> with SOCl <sub>2</sub> .....                        | S11 |
| Representative procedure for the rearrangement using Appel conditions. ....        | S11 |
| Single crystal X-ray crystallography.....                                          | S15 |
| Copies of <sup>1</sup> H and <sup>13</sup> C{ <sup>1</sup> H} NMR spectra.....     | S24 |
| References .....                                                                   | S82 |

## General experimental

Unless otherwise stated, common chemicals and solvents (HPLC-grade or reagent-grade quality) were purchased from commercial sources and used without further purification.  $\text{SOCl}_2$  was distilled prior to use. A hot plate magnetic stirrer and PEG bath was used as the heating source in all reactions requiring heat, and all reactions were performed under an atmosphere of  $\text{N}_2$ . Aluminum plates coated with a 0.2 mm-thick layer of silica gel 60 F254 were used for thin-layer chromatography (TLC) analysis, and flash column chromatography purification was carried out using silica gel 60 (230–400 mesh). Water treated silica was prepared by adding the specified volume of water to the silica gel with stirring until the mixture was thoroughly combined. A slurry was prepared with the eluent, and a glass column packed with the wet silica, and manual flash chromatography techniques used. Proton ( $^1\text{H}$ ) spectra were recorded at 25 °C in a 500 MHz spectrometer and proton-decoupled carbon ( $^{13}\text{C}\{^1\text{H}\}$ ) NMR spectra were recorded at 125 MHz using the deuterated solvent as an internal deuterium lock.  $^1\text{H}$  NMR spectra were referenced to  $\text{CDCl}_3$  ( $\delta$  7.26 ppm) and  $^{13}\text{C}\{^1\text{H}\}$  NMR spectra recorded in  $\text{CDCl}_3$  were referenced to  $\text{CDCl}_3$  ( $\delta$  77.0 ppm). High-resolution mass spectra were recorded using either a Waters Xevo time of flight or a Thermo Fisher Fusion Orbitrap mass spectrometer equipped with either an electrospray ionisation source or an atmospheric pressure chemical ionisation source, in positive or negative ionisation mode to match preferred compound ionisation properties. All chemical formula were identified with matches <5ppm. Alcohols **10a** [1], **10b** [2], and **10c** [1] were prepared according to previously published procedures.

## Preparation of alcohols 10d–f

**(1*S*,5*R*)-1',3'-Dihydro-6,8-dioxaspiro[bicyclo[3.2.1]octane-3,2'-inden]-4-one (9d)**. To a stirred solution of cyrene (**2**, 11.2 g, 87 mmol), dibromoxylene (25.0 g, 105 mmol) and tetrabutylammonium iodide (3.2 g, 8.7 mmol) in dry THF (200 mL) cooled to 0 °C was added *t*-BuOK (24.3 g, 218 mmol). After stirring for 4 h at 0 °C, the reaction was quenched by adding 1.0 M HCl (250 mL). The mixture was extracted with EtOAc (4 × 50 mL), the combined organic layers were dried over  $\text{MgSO}_4$  and concentrated under reduced pressure, and then the residue was purified by flash column chromatography on silica (200 g) with toluene (750 mL) to give **9d** (15.2 g, 76%) as an orange wax;  $[\alpha]_{\text{D}}^{25}$  -174 (*c* 1.0,  $\text{CH}_2\text{Cl}_2$ ); IR:  $\nu_{\text{max}}$  2914, 1725, 1485, 1118, 1098, 747  $\text{cm}^{-1}$ ;  $^1\text{H}$  NMR (500 MHz,  $\text{CDCl}_3$ )  $\delta$  7.21–7.10 (m, 4H), 5.25 (s, 1H), 4.75 (app. t,  $J$  = 4.8 Hz, 1H), 4.18 (d,  $J$  = 7.0 Hz, 1H), 3.91 (ddd,  $J$  = 7.0, 4.8, 1.6 Hz, 1H), 3.74 (d,  $J$  = 15.9 Hz, 1H), 3.50 (d,  $J$  = 16.2 Hz, 1H), 3.18 (d,  $J$  = 15.9 Hz, 1H), 2.70 (d,  $J$  = 16.2 Hz, 1H), 2.37 (ddd,  $J$  = 14.6, 4.8, 1.6 Hz, 1H), 2.18 (d,  $J$  = 14.6 Hz, 1H);  $^{13}\text{C}\{^1\text{H}\}$  NMR (125 MHz,  $\text{CDCl}_3$ )  $\delta$  203.1, 141.0, 139.9, 127.2, 126.9, 124.5, 124.4, 101.5, 73.9, 68.0, 51.7, 46.7, 45.1, 42.8; HRMS (ESI-TOF)  $m/z$ :  $[\text{M}+\text{Na}]^+$  calcd for  $\text{C}_{14}\text{H}_{14}\text{O}_3\text{Na}$ : 253.0835; found: 253.0832.

**(1S,5R)-3,3-Bis(4-methoxybenzyl)-6,8-dioxabicyclo[3.2.1]octan-4-one (9f).** To a solution of cyrene (**2**, 3.35 g, 26.1 mmol), 1-(bromomethyl)-4-methoxybenzene (9.00 g, 57.5 mmol) and potassium iodide (8.67 g, 52.3 mmol) in THF (100 mL) cooled to 0 °C was added *t*-BuOK (6.45 g, 57.5 mmol) in portions over 15 min. The mixture was allowed to warm to ambient temperature, stirred overnight and then quenched with 1 M HCl (200 mL). The resulting mixture was extracted with Et<sub>2</sub>O (3 × 100 mL), then the combined organic extracts were washed with satd. NaHCO<sub>3</sub> (150 mL), dried over Na<sub>2</sub>SO<sub>4</sub> and the volatiles removed under reduced pressure. The residue was dissolved in boiling MeOH (150 mL), then cooled to ambient temperature and the precipitated solid collected and washed with cold MeOH (50 mL). The mother liquor was then concentrated under reduced pressure, and the residue recrystallised from boiling MeOH (100 mL). The crystals were collected and washed with cold MeOH (50 mL) to furnish **9f** as a colourless solid (3.34 g, combined yield 35%); mp 134–135 °C;  $[\alpha]_{\text{D}}^{21}$  –17 (*c* 1.0, CH<sub>2</sub>Cl<sub>2</sub>); IR:  $\nu_{\text{max}}$  2959, 1723, 1610, 1510, 1245, 1177 cm<sup>-1</sup>; <sup>1</sup>H NMR (500 MHz, CDCl<sub>3</sub>)  $\delta$  7.04–6.97 (m, 4H), 6.84–6.78 (m, 4H), 5.03 (s, 1H), 4.55 (dd, *J* = 6.4, 5.2 Hz, 1H), 3.79 (s, 3H), 3.78 (s, 3H), 3.56 (ddd, *J* = 7.2, 5.2, 1.1 Hz, 1H), 3.22–3.13 (m, 3H), 2.67 (d, *J* = 13.5 Hz, 1H), 2.50 (d, *J* = 13.5 Hz, 1H), 2.37 (ddd, *J* = 14.6, 6.4, 1.1 Hz, 1H), 1.71 (d, *J* = 14.6 Hz, 1H); <sup>13</sup>C{<sup>1</sup>H} NMR (125 MHz, CDCl<sub>3</sub>)  $\delta$  204.6, 158.7, 158.5, 132.2, 132.1, 129.0, 128.9, 113.8, 113.7, 100.3, 72.9, 68.2, 55.4, 55.3, 50.0, 45.7, 45.0, 32.2; HRMS (ESI-TOF) *m/z*: [M+Na]<sup>+</sup> calcd for C<sub>22</sub>H<sub>24</sub>O<sub>5</sub>Na: 391.1516; found: 391.1515.

cm<sup>-1</sup>

**(1S,4S,5R)-1',3'-Dihydro-6,8-dioxaspiro[bicyclo[3.2.1]octane-3,2'-inden]-4-ol (10d).** A solution of ketone **9d** (15.2 g, 66 mmol) in CH<sub>2</sub>Cl<sub>2</sub>/MeOH (1:2, 300 mL) was cooled to –15 °C and NaBH<sub>4</sub> (1.7 g, 46.2 mmol) was added in portions over 15 minutes. The mixture was kept at –15 °C for 3 h and concentrated under reduced pressure and CH<sub>2</sub>Cl<sub>2</sub> (250 mL) and 1.0 M HCl (250 mL) were added. Following separation, the aqueous layer was extracted with CH<sub>2</sub>Cl<sub>2</sub> (2 × 100 mL) and the combined organic layers were dried over MgSO<sub>4</sub> and concentrated. The residue was recrystallized with EtOAc/petroleum spirit to give the **10d** (14.4 g, 94%) as pale-yellow crystals suitable for X-ray crystallography; mp 92–94 °C;  $[\alpha]_{\text{D}}^{25}$  –164 (*c* 1.0, CH<sub>2</sub>Cl<sub>2</sub>); IR:  $\nu_{\text{max}}$  2924, 1711, 1363, 1220, 1078, 924 cm<sup>-1</sup>; <sup>1</sup>H NMR (500 MHz, CDCl<sub>3</sub>)  $\delta$  7.20–7.09 (m, 4H), 5.38 (d, *J* = 1.6 Hz, 1H), 4.53 (ddd, *J* = 4.8, 4.3, 1.4 Hz, 1H), 4.10 (d, *J* = 7.3 Hz, 1H), 3.78 (ddd, *J* = 7.3, 4.8, 1.4 Hz, 1H), 3.69 (dd, *J* = 7.6, 1.6 Hz, 1H), 3.64 (d, *J* = 16.3 Hz, 1H), 3.18 (d, *J* = 16.3 Hz, 1H), 2.85 (d, *J* = 16.3 Hz, 1H), 2.84 (d, *J* = 16.3 Hz, 1H), 2.05 (ddd, *J* = 14.6, 4.3, 1.4 Hz, 1H), 1.92 (dd, *J* = 14.6, 1.4 Hz, 1H), 1.67 (d, *J* = 7.6 Hz, OH); <sup>13</sup>C{<sup>1</sup>H} NMR (125 MHz, CDCl<sub>3</sub>)  $\delta$  143.1, 140.9, 126.7, 126.6, 124.4, 124.2, 102.5, 76.5, 74.0, 67.9, 48.7, 46.8, 40.7, 39.8; HRMS (ESI-TOF) *m/z*: [M+H]<sup>+</sup> calcd for C<sub>14</sub>H<sub>17</sub>O<sub>3</sub>: 233.1172; found: 233.1169.



**(1*S*,4*S*,5*R*)-3,3-Dimethyl-6,8-dioxabicyclo[3.2.1]octan-4-ol (10e).** To a magnetically stirred solution of cyrene (**2**, 16.27 g, 127 mmol) and methyl iodide (25 mL, 400 mmol) in THF (200 mL) cooled to 0 °C using was added *t*-BuOK (39.79 g, 355 mmol). The resulting solution was stirred vigorously overnight, and allowed to come to ambient temperature. The reaction mixture was poured into a magnetically stirred beaker containing saturated aqueous NaHCO<sub>3</sub> (200 mL), and the mixture concentrated to a volume of 200 mL under reduced pressure in a ventilated fumehood to remove any residual methyl iodide. The aqueous mixture was extracted with Et<sub>2</sub>O (3 × 200 mL), the combined organic phases were dried (Na<sub>2</sub>SO<sub>4</sub>), filtered and volatiles were removed under reduced pressure to give **9e** (11.27 g, 57%) as a colourless oil, which was used directly in the following step without further processing; <sup>1</sup>H NMR (500 MHz, CDCl<sub>3</sub>) δ 5.15 (s, 1H), 4.71 (dddd, *J* = 5.5, 5.2, 1.5, 0.5 Hz, 1H), 4.02 (dd, *J* = 7.4 0.8 Hz, 1H), 3.84 (ddd, *J* = 7.4, 5.2, 0.5 Hz, 1H), 2.21 (ddd, *J* = 14.4, 5.5, 1.7 Hz, 1H), 1.86 (br d, *J* = 14.4 Hz, 1H), 1.32 (s, 3H), 1.16 (s, 3H). To a stirred solution of **9e** (4.62 g, 29.6 mmol) in methanol (50 mL) cooled using an ice/water bath was added NaBH<sub>4</sub> (0.57 g, mmol) in portions over 30 min. The resulting solution was stirred overnight at room temperature, then saturated aqueous NaHCO<sub>3</sub> (100 mL) was added and the mixture was extracted with EtOAc (3 × 100 mL). The combined organic extracts were dried over Na<sub>2</sub>SO<sub>4</sub>, filtered, and the volatiles were removed under reduced pressure. The residue was purified by dry flash column chromatography (gradient elution of EtOAc/petroleum spirit 1:9 to 2:3) to give **10e** (4.02 g, 86%) as a white solid (mix of diastereomers, 98:2). Small amounts of isomerically pure **10e** and crystals suitable for X-ray crystallography were obtained by vacuum sublimation; *R<sub>f</sub>* 0.4 (EtOAc/petroleum spirit, 1:3); mp 43–45 °C; [ $\alpha$ ]<sub>D</sub><sup>25</sup> –138 (*c* 0.50, CH<sub>2</sub>Cl<sub>2</sub>); IR:  $\nu_{\text{max}}$  3453, 3001, 2953, 2912, 2897, 2873 cm<sup>-1</sup>; <sup>1</sup>H NMR (500 MHz, CDCl<sub>3</sub>) δ 5.32 (d, *J* = 1.9 Hz, 1H), 4.46 (ddd, *J* = 4.7, 4.7, 1.6 Hz, 1H), 3.93 (d, *J* = 7.4 Hz, 1H), 3.72 (ddd, *J* = 7.4, 5.0, 1.5 Hz, 1H), 3.34 (dd, *J* = 11.1, 1.9 Hz, 1H), 1.88 (ddd, *J* = 14.5, 4.1, 1.5 Hz, 1H), 1.75 (d, *J* = 11.1 Hz, 1H), 1.62 (dd, *J* = 14.5, 1.5 Hz, 1H), 1.15 (s, 3H), 1.05 (s, 3H); <sup>13</sup>C{<sup>1</sup>H} NMR (125 MHz, CDCl<sub>3</sub>) δ 102.4, 76.3, 73.8, 67.7, 42.4, 34.1, 32.6, 23.7; HRMS (ESI-TOF) *m/z*: [M+Na]<sup>+</sup> calcd for C<sub>8</sub>H<sub>14</sub>NaO<sub>3</sub>: 181.0835; found: 181.0842.

**(1*S*,4*S*,5*R*)-3,3-Bis(4-methoxybenzyl)-6,8-dioxabicyclo[3.2.1]octan-4-ol (10f).** To a stirred solution of **9f** (2.00 g, 5.43 mmol) in CH<sub>2</sub>Cl<sub>2</sub>/MeOH (1:1, 20 mL) cooled to 0 °C was added NaBH<sub>4</sub> (205 mg, 5.43 mmol). After 1 h, the ice bath was removed and then the mixture was allowed to stir at ambient temperature overnight. The mixture was concentrated under reduced pressure, the residue suspended in 1 M HCl (50 mL), and then extracted with CH<sub>2</sub>Cl<sub>2</sub> (4 × 50 mL). The combined organic layers were washed with brine (50 mL), dried over Na<sub>2</sub>SO<sub>4</sub> and the solvent removed under reduced pressure. The residue was purified via flash column chromatography (petroleum spirit/EtOAc, 2:1) to yield **10f** as a colourless solid (1.83 g, 91%); *R<sub>f</sub>* 0.3 (petroleum spirit/EtOAc, 2:1); mp 54–55 °C; [ $\alpha$ ]<sub>D</sub><sup>21</sup> –51.3 (*c* 1.0, CH<sub>2</sub>Cl<sub>2</sub>); IR:  $\nu_{\text{max}}$  3461, 2958, 1610, 1510, 1250 cm<sup>-1</sup>; <sup>1</sup>H NMR (500 MHz, CDCl<sub>3</sub>) δ 7.19–7.15 (m,

2H), 7.01–6.96 (m, 2H), 6.90–6.85 (m, 2H), 6.83–6.78 (m, 2H), 5.33 (d,  $J = 2.0$  Hz, 1H), 4.42–4.39 (m, 1H), 4.24 (d,  $J = 7.5$  Hz, 1H), 3.82 (s, 3H), 3.82–3.78 (m, 1H), 3.78 (s, 3H), 3.68 (d,  $J = 2.0$  Hz, 1H), 3.09 (d,  $J = 14.1$  Hz, 1H), 2.93 (d,  $J = 14.1$  Hz, 1H), 2.78 (d,  $J = 13.6$  Hz, 1H), 2.31 (d,  $J = 13.6$  Hz, 1H), 1.77 (br s, 1H), 171–1.67 (m, 2H);  $^{13}\text{C}\{^1\text{H}\}$  NMR (125 MHz,  $\text{CDCl}_3$ )  $\delta$  158.38, 158.32, 132.7, 132.4, 129.9, 129.6, 113.8, 113.7, 102.9, 73.6, 71.6, 67.9, 55.23, 55.19, 43.4, 41.3, 38.3, 30.9; HRMS (ESI-TOF)  $m/z$ :  $[\text{M}+\text{Na}]^+$  calcd for  $\text{C}_{22}\text{H}_{26}\text{O}_5\text{Na}$ : 393.1672; found: 393.1690.

### Representative procedure for the rearrangement reaction to give 11a–f

**(1*R*,2*R*,5*S*)-7,7-Dibenzyl-2-chloro-3,8-dioxabicyclo[3.2.1]octane (11a).** To a stirred solution of **10a** (0.94 g, 3.0 mmol) in DCE (50 mL) was added  $\text{SOCl}_2$  (0.45 mL, 6.2 mmol) and pyridine (1.2 mL, 15 mmol) and the resulting solution was heated to boiling under reflux for 24 h. The solution was allowed to cool, then chilled in an ice bath and poured onto ice cold 2 M HCl (50 mL). The layers were separated and the organic phase was washed with saturated aqueous  $\text{NaHCO}_3$  (50 mL), dried using  $\text{Na}_2\text{SO}_4$ , and then the solution was passed rapidly through a  $\text{SiO}_2$  pad, washing with  $\text{CH}_2\text{Cl}_2$  and the solvent removed to afford **11a** (885 mg, 90%) as a white solid. Crystals suitable for X-ray crystallography were prepared by slow evaporation from an *i*-Pr<sub>2</sub>O solution;  $R_f$  0.6 (EtOAc/petroleum spirit 1:9, partial hydrolysis); mp 136–138 °C;  $[\alpha]_{\text{D}}^{25} -134$  ( $c$  1.0,  $\text{CH}_2\text{Cl}_2$ ); IR:  $\nu_{\text{max}}$  3085, 3060, 3028, 2964, 2927, 2874, 2855, 1602, 1583, 1495  $\text{cm}^{-1}$ ;  $^1\text{H}$  NMR (500 MHz,  $\text{CDCl}_3$ )  $\delta$  7.40–7.35 (m, 2H), 7.32–7.19 (m, 6H), 7.03–6.99 (m, 2H), 6.05 (s, 1H), 4.42 (d,  $J = 7.6$  Hz, 1H), 4.34 (dd,  $J = 11.3, 1.2$  Hz, 1H), 4.03 (s, 1H), 3.42 (d,  $J = 11.3$  Hz, 1H), 3.15 (d,  $J = 15.0$  Hz, 1H), 2.92 (d,  $J = 15.0$  Hz, 1H), 2.86 (d,  $J = 13.5$  Hz, 1H), 2.79 (d,  $J = 13.5$  Hz, 1H), 2.24 (dd,  $J = 12.4, 7.6$  Hz, 1H), 2.14 (br d,  $J = 12.4$  Hz, 1H);  $^{13}\text{C}\{^1\text{H}\}$  NMR (125 MHz,  $\text{CDCl}_3$ )  $\delta$  138.6, 138.1, 130.7, 129.84, 129.82, 128.3, 126.62, 126.58, 91.8, 83.9, 75.3, 67.3, 50.5, 43.1, 39.7, 37.9; HRMS (ESI-TOF)  $m/z$ :  $[\text{M}+\text{Na}]^+$  calcd for  $\text{C}_{20}\text{H}_{21}\text{O}_2\text{ClNa}$ : 351.1122; found: 351.1132.

**(1*R*,2*R*,5*S*)-2-Chloro-3,8-dioxabicyclo[3.2.1]octane (11b).** The reaction of **10b** (0.39 g, 3.0 mmol) in DCE (30 mL) with  $\text{SOCl}_2$  (0.45 mL, 6.2 mmol) and pyridine (1.2 mL, 15 mmol) as for **11a** gave **11b** (64 mg, 14%) as a yellowish oil contaminated with **14** (**11b**/**14** 82:18). The  $\text{SiO}_2$  pad was then washed with a further portion of EtOAc, and the solvent was removed under reduced pressure. The residue was purified by flash column chromatography (EtOAc/petroleum spirit, 1:1) to afford **13b** (75 mg, 16%) as an off-white wax;  $R_f$  0.4 (EtOAc/petroleum spirit, 1:9);  $^1\text{H}$  NMR (500 MHz,  $\text{CDCl}_3$ )  $\delta$  5.68 (ddd,  $J = 1.0, 1.0, 1.0$  Hz, 1H), 4.33 (br s, 1H), 4.29 (br d,  $J = 11.3$  Hz, 1H), 4.26–4.24 (br m, 1H), 3.40 (ddd,  $J = 11.2, 1.0, 1.0$  Hz, 1H), 2.05–1.98 (m, 4H);  $^{13}\text{C}\{^1\text{H}\}$  NMR (125 MHz,  $\text{CDCl}_3$ )  $\delta$  93.3, 78.9, 74.8, 67.2, 28.1, 26.0; ESI-MS  $m/z$  171.0  $[\text{M}+\text{Na}]^+$ ; No molecular ions were observed when analysed by MS, and only species corresponding to hydrolysed material were seen. **(1*S*,4*R*,5*R*)-4-chloro-6,8-dioxabicyclo[3.2.1]octane (14).**  $^1\text{H}$  NMR (500 MHz,  $\text{CDCl}_3$ )  $\delta$  5.39 (br s, 1H), 4.57–4.53 (m, 1H), 3.94

(dd,  $J = 7.2, 0.7$  Hz, 1H), 3.88–3.86 (m, 1H), 3.83 (ddd,  $J = 7.2, 5.1, 1.2$  Hz, 1H), 2.36–2.22 (m, 2H), 1.89–1.85 (m, 1H), 1.45–1.41 (m, 1H);  $^{13}\text{C}\{^1\text{H}\}$  NMR (125 MHz,  $\text{CDCl}_3$ )  $\delta$  101.6, 73.4, 67.3, 54.8, 24.4, 24.3.

**Di((1*S*,4*S*,5*R*)-6,8-dioxabicyclo[3.2.1]octan-4-yl) sulfite (13b).** Crystals suitable for X-ray crystallography were prepared by slow evaporation from  $\text{CH}_2\text{Cl}_2/n$ -heptane solution;  $R_f$  0.4 (EtOAc/petroleum spirit 1:1); mp 111–114 °C ( $\text{CH}_2\text{Cl}_2/n$ -heptane);  $[\alpha]_{\text{D}}^{16} -141$  ( $c$  0.50,  $\text{CH}_2\text{Cl}_2$ ); IR:  $\nu_{\text{max}}$  2957, 2896, 2858  $\text{cm}^{-1}$ ;  $^1\text{H}$  NMR (500 MHz,  $\text{CDCl}_3$ )  $\delta$  5.44 (br s, 1H), 5.39 (br s, 1H), 4.55–4.47 (m, 4H), 3.92–3.89 (m, 2H), 3.85–3.80 (m, 2H), 2.04–1.82 (m, 6H), 1.69–1.60 (m, 2H);  $^{13}\text{C}\{^1\text{H}\}$  NMR (125 MHz,  $\text{CDCl}_3$ )  $\delta$  101.2, 100.9, 72.93, 72.90, 71.1, 70.8, 68.50, 68.47, 28.13, 28.11, 23.7, 23.62; HRMS (ESI-TOF)  $m/z$ :  $[\text{M}+\text{Na}]^+$  calcd for  $\text{C}_{12}\text{H}_{18}\text{NaO}_7\text{S}$ : 329.0665; found: 329.0666.

**(1*R*,2*R*,5*S*)-2-Chloro-7,7-bis(2-methylbenzyl)-3,8-dioxabicyclo[3.2.1]octane (11c).** The reaction of **10c** (0.69 g, 2.0 mmol) in DCE (30 mL) with  $\text{SOCl}_2$  (0.30 mL, 4.1 mmol) and pyridine (0.80 mL, 10 mmol) as for **11a** gave **11c** (630 mg, 89%) as a white solid;  $R_f$  0.6 (EtOAc/petroleum spirit 1:9, partial hydrolysis); mp 144–149 °C;  $[\alpha]_{\text{D}}^{25} -101$  ( $c$  1.0,  $\text{CH}_2\text{Cl}_2$ ); IR:  $\nu_{\text{max}}$  3103, 3062, 3020, 2966, 2874, 1603, 1490  $\text{cm}^{-1}$ ;  $^1\text{H}$  NMR (500 MHz,  $\text{CDCl}_3$ )  $\delta$  7.32 (d,  $J = 7.7$  Hz, 1H), 7.29–7.17 (m, 3H), 7.14 (d,  $J = 7.5$  Hz, 1H), 7.09 (t,  $J = 7.5$  Hz, 1H), 6.98 (t,  $J = 7.5$  Hz, 1H), 6.59 (d,  $J = 7.5$  Hz, 1H), 6.01 (s, 1H), 4.50 (d,  $J = 7.8$  Hz, 1H), 4.36 (d,  $J = 11.2$  Hz, 1H), 4.00 (s, 1H), 3.40 (d,  $J = 11.2$  Hz, 1H), 3.08–3.00 (m, 3H), 2.93 (d,  $J = 16.9$  Hz, 1H), 2.37 (dd,  $J = 12.5, 7.8$  Hz, 1H), 2.27 (s, 3H), 2.26 (s, 3H), 2.04 (d,  $J = 12.5$  Hz, 1H);  $^{13}\text{C}\{^1\text{H}\}$  NMR (125 MHz,  $\text{CDCl}_3$ )  $\delta$  137.6, 137.3, 136.8, 136.6, 131.0, 130.7, 130.4, 127.4, 126.5, 126.2, 126.1, 125.5, 91.6, 84.4, 75.2, 67.1, 50.3, 40.1, 37.5, 33.8, 20.5, 19.9; No molecular ions were observed when analysed by MS, and only species corresponding to hydrolysed material were seen.

**(1*S*,4*R*,5*R*)-4-Chloro-1',3'-dihydro-3,8-dioxaspiro[bicyclo[3.2.1]octane-6,2'-indene] (11d).** The reaction of **10d** (0.67 g, 2.9 mmol) in DCE (50 mL) with  $\text{SOCl}_2$  (0.45 mL, 6.2 mmol) and pyridine (1.2 mL, 15 mmol) as for **11a** gave **11d** (248 mg, 34%) as a white solid. The  $\text{SiO}_2$  pad used to purify **11d** was washed with EtOAc, and the volatiles removed under reduced pressure. The residue was subjected to flash column chromatography (EtOAc/petroleum spirit 3:7) to give **13d** (233 mg, 32%) as an amorphous white solid in addition to starting material **10d** (74 mg, 11%). Crystals of **11d** suitable for X-ray crystallography were prepared by slow evaporation from  $\text{CH}_2\text{Cl}_2/n$ -heptane solution;  $R_f$  0.5 (EtOAc/petroleum spirit 1:9, partial hydrolysis); mp 178–182 °C ( $\text{CH}_2\text{Cl}_2/n$ -heptane);  $[\alpha]_{\text{D}}^{25} -93$  ( $c$  1.0,  $\text{CH}_2\text{Cl}_2$ ); IR:  $\nu_{\text{max}}$  2988, 2962, 2946, 2928, 2872, 2839  $\text{cm}^{-1}$ ;  $^1\text{H}$  NMR (500 MHz,  $\text{CDCl}_3$ )  $\delta$  7.28–7.14

(m, 4H), 5.97 (ddd,  $J = 0.8, 0.8, 0.8$  Hz, 1H), 4.43 (br d,  $J = 7.7$  Hz, 1H), 4.36 (br d,  $J = 11.2$  Hz, 1H), 3.87 (s, 1H), 3.41 (ddd,  $J = 11.2, 0.8, 0.8$  Hz, 1H), 3.16 (d,  $J = 15.4$  Hz, 1H), 3.09 (d,  $J = 15.4$  Hz, 1H), 3.08 (d,  $J = 15.3$  Hz, 1H), 2.95 (d,  $J = 15.3$  Hz, 1H), 2.21 (dd,  $J = 12.6, 7.7$  Hz, 1H), 2.04 (br d,  $J = 12.6$  Hz, 1H);  $^{13}\text{C}\{^1\text{H}\}$  NMR (125 MHz,  $\text{CDCl}_3$ )  $\delta$  141.8, 141.6, 126.69, 126.66, 124.7, 124.2, 91.8, 85.5, 75.3, 67.1, 54.7, 48.8, 41.4, 39.5; No molecular ions were observed when analysed by MS, and only species corresponding to hydrolysed material were seen.

**Bis((1*S*,4*S*,5*R*)-1',3'-dihydro-6,8-dioxaspiro[bicyclo[3.2.1]octane-3,2'-inden]-4-yl) sulfite (13d).**  $R_f$  0.6 (EtOAc/petroleum spirit 1:2); mp 200 °C (dec);  $[\alpha]_{\text{D}}^{18} -102$  ( $c$  0.54,  $\text{CH}_2\text{Cl}_2$ ); IR:  $\nu_{\text{max}}$  2987, 2970, 2901  $\text{cm}^{-1}$ ;  $^1\text{H}$  NMR (500 MHz,  $\text{CDCl}_3$ )  $\delta$  7.17–6.98 (m, 6H), 6.97–6.93 (m, 2H), 5.47 (d,  $J = 1.7$  Hz, 1H), 5.44 (d,  $J = 1.7$  Hz, 1H), 4.51–4.48 (m, 2H), 4.33 (d,  $J = 1.7$  Hz, 1H), 4.27 (d,  $J = 1.7$  Hz, 1H), 4.14 (app. d,  $J = 7.8$  Hz, 2H), 3.81–3.76 (m, 2H), 3.60 (d,  $J = 16.2$  Hz, 1H), 3.57 (d,  $J = 16.2$  Hz, 1H), 3.14 (d,  $J = 16.2$  Hz, 1H), 2.98 (d,  $J = 16.2$  Hz, 1H), 2.87 (d,  $J = 16.2$  Hz, 1H), 2.86 (d,  $J = 16.2$  Hz, 1H), 2.73 (d,  $J = 16.2$  Hz, 1H), 2.72 (d,  $J = 16.2$  Hz, 1H), 2.06–2.01 (m, 2H), 1.99–1.93 (m, 2H);  $^{13}\text{C}\{^1\text{H}\}$  NMR (125 MHz,  $\text{CDCl}_3$ )  $\delta$  142.8, 142.6, 140.04, 140.00, 126.5, 126.4, 126.21, 126.16, 124.3, 124.01, 123.94, 123.88, 101.6, 100.9, 78.2, 76.2, 73.7, 73.6, 67.8, 67.7, 48.0, 47.7, 45.6, 45.5, 41.4, 41.3, 40.5, 40.0; HRMS (ESI-TOF)  $m/z$ :  $[\text{M}+\text{Na}]^+$  calcd for  $\text{C}_{28}\text{H}_{30}\text{NaO}_7\text{S}$ : 533.1604; found: 533.1605.

**(1*R*,2*R*,5*S*)-2-Chloro-7,7-dimethyl-3,8-dioxabicyclo[3.2.1]octane (11e).** The reaction of **10e** (0.47 g, 3.0 mmol) in DCE (40 mL) with  $\text{SOCl}_2$  (0.45 mL, 6.2 mmol) and pyridine (1.2 mL, 15 mmol) as for the synthesis of **11a** gave **11e** (312 mg, 59%) as a white solid. The  $\text{SiO}_2$  pad was washed with EtOAc, and the volatiles removed under reduced pressure. The residue was subjected to flash column chromatography (EtOAc/petroleum spirit, 1:2) to give **13e** (80 mg, 15%) as a colourless oil. Crystals suitable for X-ray crystallography of **11e** were obtained by vacuum sublimation;  $R_f$  0.7 (EtOAc/petroleum spirit 1:9, partial hydrolysis); mp 63–67 °C;  $[\alpha]_{\text{D}}^{23} +218$  ( $c$  0.78,  $\text{CH}_2\text{Cl}_2$ ); IR:  $\nu_{\text{max}}$  2961, 2881, 1459, 1226, 1147, 1102  $\text{cm}^{-1}$ ;  $^1\text{H}$  NMR (500 MHz,  $\text{CDCl}_3$ )  $\delta$  5.95 (br s, 1H), 4.35 (br d,  $J = 7.9$  Hz, 1H), 4.29 (br d,  $J = 11.1$  Hz, 1H), 3.55 (br s, 1H), 3.35 (br d,  $J = 11.1$  Hz, 1H), 1.92 (dd,  $J = 12.3, 7.9$  Hz, 1H), 1.80 (br d,  $J = 12.3$  Hz, 1H), 1.27 (s, 3H), 1.16 (s, 3H);  $^{13}\text{C}\{^1\text{H}\}$  NMR (125 MHz,  $\text{CDCl}_3$ )  $\delta$  91.9, 86.9, 75.7, 67.0, 42.1, 41.7, 31.1, 22.4; No molecular ions were observed when analysed by MS, and only species corresponding to hydrolysed material were seen.

**Di((1*S*,4*S*,5*R*)-3,3-dimethyl-6,8-dioxabicyclo[3.2.1]octan-4-yl) sulfite (13e).**  $R_f$  0.6 (EtOAc/petroleum spirit; 1:2);  $[\alpha]_{\text{D}}^{25} -63$  ( $c$  0.98,  $\text{CH}_2\text{Cl}_2$ ); IR:  $\nu_{\text{max}}$  3683, 2973, 2899, 1394, 1203, 1156, 1056  $\text{cm}^{-1}$ ;  $^1\text{H}$  NMR (500 MHz,  $\text{CDCl}_3$ )  $\delta$  5.52 (d,  $J = 1.8$  Hz, 1H), 5.47 (d,  $J = 1.8$  Hz, 1H), 4.47–4.44

(m, 2H), 4.31 (d,  $J = 1.8$  Hz, 1H), 4.21 (d,  $J = 1.8$  Hz, 1H), 3.98 (app. br d,  $J = 7.3$  Hz, 2H), 3.75–3.71 (m, 2H), 1.98–1.92 (m, 2H), 1.70–1.64 (m, 2H), 1.21 (s, 3H), 1.19 (s, 3H), 1.05 (s, 3H), 0.99 (s, 3H);  $^{13}\text{C}\{^1\text{H}\}$  NMR (125 MHz,  $\text{CDCl}_3$ )  $\delta$  101.5, 100.8, 79.1, 76.9, 73.54, 73.51, 67.9 (2C), 43.2 (2C), 33.9, 33.8, 32.23, 32.18, 24.50, 24.45; HRMS (ESI-TOF)  $m/z$ :  $[\text{M}+\text{Na}]^+$  calcd for  $\text{C}_{16}\text{H}_{26}\text{NaO}_7\text{S}$ : 385.1291; found: 385.1310

**(1R,2R,5S)-2-Chloro-7,7-bis(4-methoxybenzyl)-3,8-dioxabicyclo[3.2.1]octane (11f).** The reaction of **10f** (0.200 g, 0.54 mmol) in DCE (3 mL) with  $\text{SOCl}_2$  (78  $\mu\text{L}$ , 1.08 mmol) and pyridine (0.217 mL, 1.65 mmol) as for **11a** gave **11f** (65 mg, 31%) as a colourless solid;  $R_f$  0.6 (petroleum spirit/EtOAc, 2:1); mp 121–123  $^\circ\text{C}$ ;  $[\alpha]_{\text{D}}^{20} +61.3$  (c .75,  $\text{CH}_2\text{Cl}_2$ ); IR:  $\nu_{\text{max}}$  2986, 2898, 1610, 1511, 1246  $\text{cm}^{-1}$ ;  $^1\text{H}$  NMR (500 MHz,  $\text{CDCl}_3$ )  $\delta$  7.23–7.18 (m, 2H), 6.95–6.89 (m, 4H), 6.80–6.75 (m, 2H), 6.03 (s, 1H), 4.41 (br d,  $J = 7.7$  Hz, 1H), 4.33 (dd,  $J = 11.2, 1.1$  Hz, 1H), 3.99 (s,  $J = 5.2$  Hz, 1H), 3.84 (s, 3H), 3.78 (s, 3H), 3.41 (d,  $J = 11.2$  Hz, 1H), 3.06 (d,  $J = 15.0$  Hz, 1H), 2.83 (d,  $J = 15.0$  Hz, 1H), 2.78 (d,  $J = 13.8$  Hz, 1H), 2.71 (d,  $J = 13.8$  Hz, 1H), 2.18 (dd,  $J = 12.3, 7.7$  Hz, 1H), 2.10 (dd,  $J = 12.3, 1.1$  Hz, 1H);  $^{13}\text{C}\{^1\text{H}\}$  NMR (125 MHz,  $\text{CDCl}_3$ )  $\delta$  158.2, 158.1, 131.5, 130.6, 130.4, 130.0, 114.0, 113.5, 91.8, 83.7, 75.2, 67.2, 55.3, 55.2, 50.5, 42.0, 39.4, 36.7; No molecular ions were observed when analysed by MS, and only species corresponding to hydrolysed material were seen.

### Representative procedure for the formation of alcohols **12a,c–f**.

**(1R,2S,5S)-7,7-Dibenzyl-3,8-dioxabicyclo[3.2.1]octan-2-ol (12a).** To a stirred solution of **10a** (0.62 g, 2.0 mmol) in DCE (30 mL) was added  $\text{SOCl}_2$  (0.30 mL, 4.1 mmol) and pyridine (0.80 mL, 10 mmol) and the resulting solution was heated to reflux for 24 hours. The mixture was diluted with  $\text{CH}_2\text{Cl}_2$  (20 mL) and poured into ice cooled 2 M HCl (15 mL) and the phases were separated. The organic phase was washed with satd. aqueous  $\text{NaHCO}_3$  (15 mL) and dried over  $\text{Na}_2\text{SO}_4$ , filtered and the volatiles removed under reduced pressure. The residue was purified via flash column chromatography (EtOAc/petroleum spirit, 1:1) using water treated silica (0.6 mL  $\text{H}_2\text{O}$  in 30 mL  $\text{SiO}_2$ ) to afford **12a** (565 mg 91%) as a white solid. Crystals suitable for X-ray crystallography were prepared from a solution of  $\text{CH}_2\text{Cl}_2/n$ -heptane;  $R_f$  0.3 (EtOAc/petroleum spirit, 1:2); mp 110–115  $^\circ\text{C}$ ;  $[\alpha]_{\text{D}}^{25} -15$  (c 1.2,  $\text{CH}_2\text{Cl}_2$ ); IR:  $\nu_{\text{max}}$  3411, 3085, 3059, 3028, 2955, 1727, 1602, 1582, 1496  $\text{cm}^{-1}$ ;  $^1\text{H}$  NMR (500 MHz,  $\text{CDCl}_3$ )  $\delta$  7.38–7.19 (m, 9H), 7.04–7.02 (m, 1H), 4.95 (br d,  $J = 10.4$  Hz, 1H), 4.28 (br dd,  $J = 4.5, 4.5$  Hz, 1H), 4.16 (dd,  $J = 11.4, 1.3$  Hz, 1H), 3.95 (d,  $J = 10.4$  Hz, 1H), 3.91 (s, 1H), 3.30 (d,  $J = 11.4$  Hz, 1H), 3.25 (d,  $J = 14.9$  Hz, 1H), 2.95 (d,  $J = 14.9$  Hz, 1H), 2.85 (d,  $J = 13.5$  Hz, 1H), 2.75 (d,  $J = 13.5$  Hz, 1H), 2.21–2.19 (m, 2H);  $^{13}\text{C}\{^1\text{H}\}$  NMR (125 MHz,  $\text{CDCl}_3$ )  $\delta$  138.9, 138.5, 130.4, 129.8, 128.5, 128.0, 126.3,

126.3, 89.9, 82.4, 76.1, 65.6, 48.2, 43.5, 38.9, 38.0; HRMS (ESI-TOF)  $m/z$ :  $[M+Na]^+$  calcd for  $C_{20}H_{22}NaO_3$ : 333.1461; found: 333.1471.

**(1R,2S,5S)-7,7-Bis(2-methylbenzyl)-3,8-dioxabicyclo[3.2.1]octan-2-ol (12c).** The reaction of **10c** (0.35 g, 1.0 mmol) in DCE (30 mL) with  $SOCl_2$  (0.20 mL, 2.8 mmol) and pyridine (0.40 mL, 5 mmol) as for **12a** gave **12c** (287 mg, 85%) as a crystalline white solid;  $R_f$  0.4 (EtOAc/petroleum spirit, 1:2); mp 62–67 °C;  $[\alpha]_D^{20} +34$  (c 0.50,  $CH_2Cl_2$ ); IR:  $\nu_{max}$  3419, 3062, 3020, 2956, 2871, 1726, 1603, 1491  $cm^{-1}$ ;  $^1H$  NMR (500 MHz,  $CDCl_3$ )  $\delta$  7.36 (d,  $J = 7.5$  Hz, 1H), 7.27–7.16 (m, 3H), 7.13 (br d,  $J = 7.5$  Hz, 1H), 7.08 (ddd,  $J = 7.5, 7.5, 1.4$  Hz, 1H), 6.98 (ddd,  $J = 7.5, 7.5, 1.4$  Hz, 1H), 6.63 (dd,  $J = 7.5, 1.4$  Hz, 1H), 4.89 (d,  $J = 9.7$  Hz, 1H), 4.39 (br d,  $J = 7.8$  Hz, 1H), 4.19 (dd,  $J = 11.5, 1.7$  Hz, 1H), 3.85 (s, 1H), 3.82 (br d,  $J = 9.7$  Hz, 1H), 3.28 (br d,  $J = 11.5$  Hz, 1H), 3.14 (d,  $J = 16.9$  Hz, 1H), 3.06 (d,  $J = 13.9$  Hz, 1H), 2.98 (d,  $J = 13.9$  Hz, 1H), 2.97 (d,  $J = 16.9$  Hz, 1H), 2.32 (dd,  $J = 12.4, 7.8$  Hz, 1H), 2.27 (s, 3H), 2.24 (s, 3H), 2.12 (br d,  $J = 12.4$  Hz, 1H);  $^{13}C\{^1H\}$  NMR (125 MHz,  $CDCl_3$ )  $\delta$  137.5, 137.3 (2C), 137.0, 130.8, 130.6, 130.3, 127.7, 126.4, 126.0, 125.9, 125.5, 89.8, 82.9, 76.1, 65.6, 48.3, 39.9, 37.7, 33.5, 20.5, 19.9; HRMS (ESI-TOF)  $m/z$ :  $[M+Na]^+$  calcd for  $C_{22}H_{26}NaO_3$ : 361.1774; found: 361.1788.

**(1S,4S,5R)-1',3'-Dihydro-3,8-dioxaspiro[bicyclo[3.2.1]octane-6,2'-inden]-4-ol (12d).** The reaction of **10d** (0.44 g, 1.9 mmol) in DCE (30 mL) with  $SOCl_2$  (0.30 mL, 4.1 mmol) and pyridine (0.80 mL, 10 mmol) as for **12a** gave **12d** (125 mg, 28%) and **13d** (11 mg, 2%), and recovered starting material **10d** (175 mg, 40%). Crystals suitable for X-ray crystallography of **12d** were prepared by slow evaporation from EtOAc solution;  $R_f$  0.3 (EtOAc/petroleum spirit, 1:1); mp 169–171 °C (EtOAc);  $[\alpha]_D^{25} +58$  (c 0.52,  $CH_2Cl_2$ ); IR:  $\nu_{max}$  3458, 3433, 3021, 2967, 2953, 2918, 2871, 2844, 1727, 1602  $cm^{-1}$ ;  $^1H$  NMR (500 MHz,  $CDCl_3$ )  $\delta$  7.24–7.14 (m, 4H), 4.87 (d,  $J = 10.2$  Hz, 1H), 4.34 (br d,  $J = 7.6$  Hz, 1H), 4.21 (dd,  $J = 11.5, 1.5$  Hz, 1H), 3.78 (br d,  $J = 9.7$  Hz, 1H), 3.73 (s, 1H), 3.30 (d,  $J = 11.5$  Hz, 1H), 3.20 (d,  $J = 15.6$  Hz, 1H), 3.14 (d,  $J = 15.6$  Hz, 1H), 3.07 (d,  $J = 15.2$  Hz, 1H), 2.95 (d,  $J = 15.2$  Hz, 1H), 2.17 (dd,  $J = 12.4, 7.6$  Hz, 1H), 2.08 (dd,  $J = 12.4, 1.5$  Hz, 1H);  $^{13}C\{^1H\}$  NMR (125 MHz,  $CDCl_3$ )  $\delta$  142.3, 141.9, 126.6, 126.5, 124.6, 124.3, 90.4, 84.4, 76.4, 65.6, 52.8, 48.9, 41.4, 39.4; HRMS (ESI-TOF)  $m/z$ :  $[M+H]^+$  calcd for  $C_{14}H_{17}O_3$ : 233.1172 found: 233.1187.

**(1R,2S,5S)-7,7-Dimethyl-3,8-dioxabicyclo[3.2.1]octan-2-ol (12e).** The reaction of **10e** (0.48 g, 3.0 mmol) in DCE (50 mL) with  $SOCl_2$  (0.45 mL, 6.2 mmol) and pyridine (1.2 mL, 15 mmol) as for **12a** gave **12e** (244 mg 51%) as a crystalline white solid, sulphite **13e** (43 mg, 8%) and recovered starting material **10e** (46 mg, 10%);  $R_f$  0.3 (EtOAc/petroleum spirit, 1:2); mp 54–62 °C (EtOAc/*n*-heptane);

$[\alpha]_{\text{D}}^{25} +24$  (*c* 0.81, CH<sub>2</sub>Cl<sub>2</sub>); IR:  $\nu_{\text{max}}$  3424, 2970, 2953, 2936, 2870, 1729 cm<sup>-1</sup>; <sup>1</sup>H NMR (500 MHz, CDCl<sub>3</sub>)  $\delta$  4.81 (br d, *J* = 0.4 Hz, 1H), 4.27 (br d, *J* = 7.0 Hz, 1H), 4.13 (dd, *J* = 1.4, 1.5 Hz, 1H), 3.89 (d, *J* = 10.4 Hz, 1H), 3.39 (br s, 1H), 3.23 (br d, *J* = 0.4 Hz, 1H), 1.87, (dd, *J* = 12.2, 7.4 Hz, 1H), 1.82 (dd, *J* = 12.2, 1.5 Hz, 1H), 1.28 (s, 3H), 1.15 (s, 3H); <sup>13</sup>C{<sup>1</sup>H} NMR (125 MHz, CDCl<sub>3</sub>)  $\delta$  90.0, 85.7, 76.7, 65.5, 41.6, 39.8, 31.2, 22.0; HRMS (ESI-TOF) *m/z*: [M+Na]<sup>+</sup> calcd for C<sub>8</sub>H<sub>14</sub>NaO<sub>3</sub>: 181.0835; found: 181.0849.

**(1R,2S,5S)-7,7-Bis(4-methoxybenzyl)-3,8-dioxabicyclo[3.2.1]octan-2-ol (12f).** The reaction of **10f** (0.122 g, 0.33 mmol) in DCE (2 mL) with SOCl<sub>2</sub> (48  $\mu$ L, 0.66 mmol) and pyridine (0.133 mL, 1.65 mmol) as for **12a** gave **12f** as a colourless solid (70 mg, 57%); *R<sub>f</sub>* 0.4 (petroleum spirit/EtOAc, 1:1); mp 48–50 °C;  $[\alpha]_{\text{D}}^{20} -24.3$  (*c* 1.0, CH<sub>2</sub>Cl<sub>2</sub>); IR:  $\nu_{\text{max}}$  3421, 2937, 2834, 1610, 1510, 1244 cm<sup>-1</sup>; <sup>1</sup>H NMR (500 MHz, CDCl<sub>3</sub>)  $\delta$  7.23–7.20 (m, 2H), 6.96–6.92 (m, 2H), 6.92–6.88 (m, 2H), 6.79–6.76 (m, 2H), 4.92 (s, 1H), 4.29–4.26 (m, 1H), 4.15 (dd, *J* = 11.4, 1.4 Hz, 1H), 3.87–3.85 (m, 1H), 3.83 (s, 3H), 3.77 (s, 3H), 3.29 (d, *J* = 11.4 Hz, 1H), 3.16 (d, *J* = 14.8 Hz, 1H), 2.86 (d, *J* = 14.8 Hz, 1H), 2.77 (d, *J* = 13.8 Hz, 1H), 2.67 (d, *J* = 13.8 Hz, 1H), 2.16–2.12 (m, 2H), 1.26 (br s, 1H); <sup>13</sup>C{<sup>1</sup>H} NMR (125 MHz, CDCl<sub>3</sub>)  $\delta$  158.1, 158.0, 131.4, 130.79, 130.85, 130.5, 113.9, 113.4, 89.9, 82.4, 76.1, 65.7, 55.3, 55.2, 48.4, 42.4, 38.9, 36.8; HRMS (ESI-TOF) *m/z*: [M+Na]<sup>+</sup> calcd for C<sub>22</sub>H<sub>26</sub>NaO<sub>5</sub>: 393.1672; found: 393.1685.

**(1S,4S,5R)-4-Chloro-6,8-dioxabicyclo[3.2.1]oct-2-ene (16).**[3] The reaction of **15** (0.39 g, 3.0 mmol) in DCE (30 mL) with SOCl<sub>2</sub> (0.45 mL, 6.2 mmol) and pyridine (1.2 mL, 15 mmol) was performed as for **11a** with purification by flash column chromatography (EtOAc/petroleum spirit, 1:9) to affording order of elution **17a** (32 mg, 7%), **16** (142 mg, 32%), then **17b** (5 mg, 1%) as colourless oils; *R<sub>f</sub>* 0.4

(EtOAc/petroleum spirit, 1:9);  $[\alpha]_{\text{D}}^{25} -310$  (*c* 1.0, CH<sub>2</sub>Cl<sub>2</sub>); IR:  $\nu_{\text{max}}$  2966, 2893 cm<sup>-1</sup>; <sup>1</sup>H NMR (500 MHz, CDCl<sub>3</sub>)  $\delta$  6.18 (ddd, *J* = 9.7, 4.8, 1.5 Hz, 1H), 5.82 (ddd, *J* = 9.7, 3.8, 1.5 Hz, 1H), 5.63 (br dd, *J* = 1.5, 1.5 Hz, 1H), 4.76 (ddd, *J* = 4.8, 3.2, 1.5 Hz, 1H), 4.07 (ddd, *J* = 3.8, 1.5, 1.5 Hz, 1H), 3.78–3.75 (m, 2H); <sup>13</sup>C{<sup>1</sup>H} NMR (125 MHz, CDCl<sub>3</sub>)  $\delta$  130.1, 125.1, 102.1, 70.5, 70.4, 52.5.

**(1R,2R,5R)-2-Chloro-6,8-dioxabicyclo[3.2.1]oct-3-ene (17a).**[1] *R<sub>f</sub>* 0.7 (EtOAc/petroleum spirit, 1:9);  $[\alpha]_{\text{D}}^{25} -13$  (*c* 1.0, CH<sub>2</sub>Cl<sub>2</sub>); IR:  $\nu_{\text{max}}$  2974, 2904, 1633 cm<sup>-1</sup>; <sup>1</sup>H NMR (500 MHz, CDCl<sub>3</sub>)  $\delta$  5.93 (ddd, *J* = 9.6, 3.1, 1.9 Hz, 1H), 5.72 (ddd, *J* = 9.6, 1.9, 1.9 Hz, 1H), 5.52 (d, *J* = 3.1 Hz, 1H), 5.00 (dddd, *J* = 3.9, 1.9, 1.9, 1.9 Hz, 1H), 4.62 (dddd, *J* = 6.2, 3.9, 1.9, 1.9 Hz, 1H), 4.29 (dd, *J* = 8.4, 1.9 Hz, 1H), 3.96 (ddd, *J* = 8.4, 6.2, 1.9 Hz, 1H); <sup>13</sup>C{<sup>1</sup>H} NMR (125 MHz, CDCl<sub>3</sub>)  $\delta$  129.4, 127.3, 95.6, 75.1, 63.6, 55.7.

**(1*R*,2*S*,5*R*)-2-Chloro-6,8-dioxabicyclo[3.2.1]oct-3-ene (17b).** [1] *R<sub>f</sub>* 0.3 (EtOAc/petroleum spirit, 1:9);  $[\alpha]_{\text{D}}^{25} +149$  (*c* 1.0, CH<sub>2</sub>Cl<sub>2</sub>); IR:  $\nu_{\text{max}}$  2961, 2923, 2852, 1634 cm<sup>-1</sup>; <sup>1</sup>H NMR (500 MHz, CDCl<sub>3</sub>)  $\delta$  6.05 (ddd, *J* = 9.5, 3.5, 1.0 Hz, 1H), 5.85 (dddd, *J* = 9.5, 4.4, 1.9, 1.0 Hz, 1H), 5.60 (dd, *J* = 3.5, 1.0 Hz, 1H), 4.78 (dddd, *J* = 6.5, 1.9, 1.9, 1.0 Hz, 1H), 4.17 (ddd, *J* = 4.4, 1.0, 1.0 Hz, 1H), 4.01 (dd, *J* = 8.2, 6.5 Hz, 1H), 3.56 (dd, *J* = 8.2, 1.9 Hz, 1H); <sup>13</sup>C{<sup>1</sup>H} NMR (125 MHz, CDCl<sub>3</sub>)  $\delta$  129.7, 125.0, 95.6, 76.7, 64.8, 54.2.

### Reactions of alcohol 18 with SOCl<sub>2</sub>.

The reaction of **18** (0.63 g, 2.9 mmol) in DCE (50 mL) with SOCl<sub>2</sub> (0.45 mL, 6.2 mmol) and pyridine (1.2 mL, 15 mmol) was performed as for **11a** with purification by flash column chromatography (EtOAc/petroleum spirit 2:23). Eluting first was **20** (114 mg, 17%, dr 91:9) as a colourless oil followed by **19** (10 mg, 1%) as a white crystalline solid. **(1*S*,5*R*)-3-(Chloro(phenyl)methyl)-6,8-dioxabicyclo[3.2.1]oct-3-ene (20)** major isomer: <sup>1</sup>H NMR (500 MHz, CDCl<sub>3</sub>)  $\delta$  7.39–7.35 (m, 2H), 7.32–7.23 (m, 3H), 6.77 (d, *J* = 2.2 Hz, 1H), 5.57 (d, *J* = 2.2 Hz, 1H), 4.65–4.62 (m, 1H), 4.39 (s, 1H), 3.76 (ddd, *J* = 7.0, 5.2 Hz, 1H), 3.71 (br d, *J* = 7.0 Hz, 1H), 3.07–3.01 (m, 1H), 2.64 (br d, *J* = 15.2 Hz, 1H); <sup>13</sup>C{<sup>1</sup>H} NMR (125 MHz, CDCl<sub>3</sub>)  $\delta$  135.4, 134.6, 131.2, 128.9, 128.4, 127.6, 102.1, 72.9, 68.0, 61.2, 31.3; minor isomer: <sup>1</sup>H NMR (500 MHz, CDCl<sub>3</sub>, partial)  $\delta$  7.10 (br s, 1H), 4.67 (br s, 1H), 2.86 (br d, *J* = 14.8 Hz, 1H), 2.80–2.75 (m, 1H); <sup>13</sup>C{<sup>1</sup>H} NMR (125 MHz, CDCl<sub>3</sub>)  $\delta$  136.2, 130.7, 130.4, 128.9, 128.3, 127.1, 103.1, 73.5, 68.8, 62.2, 35.5.

**(1*S*,5*R*)-3-((*E*)-Benzylidene)-4-chloro-6,8-dioxabicyclo[3.2.1]octane (19).** mp 108–113 °C; <sup>1</sup>H NMR (500 MHz, CDCl<sub>3</sub>)  $\delta$  7.41–7.35 (m, 4H), 7.30–7.26 (m, 1H), 6.56 (d, *J* = 2.0 Hz, 1H), 5.45 (d, *J* = 1.7 Hz, 1H), 4.73–4.70 (m, 1H), 4.57 (br s, 1H), 3.89 (d, *J* = 6.8 Hz, 1H), 3.78 (ddd, *J* = 6.8, 5.1, 1.5 Hz, 1H), 3.20 (br d, *J* = 14.9 Hz, 1H), 2.20 (br d, *J* = 14.9 Hz, 1H); <sup>13</sup>C{<sup>1</sup>H} NMR (125 MHz, CDCl<sub>3</sub>)  $\delta$  135.3, 133.6, 130.9, 128.6, 128.5, 127.6, 101.9, 73.9, 67.7, 55.1, 36.5; HRMS (ESI-TOF) *m/z*: [M+H]<sup>+</sup> calcd for C<sub>13</sub>H<sub>14</sub>ClO<sub>2</sub>: 237.0677; found: 237.0674.

### Representative procedure for the rearrangement using Appel conditions.

**Preparation of 11a using Appel conditions.** To a stirred solution of **10a** (311 mg, 1.0 mmol) in DCE (5 mL) was added PPh<sub>3</sub> (1.05 g, 4.0 mmol), CCl<sub>4</sub> (0.24 mL, 2.5 mmol) and Et<sub>3</sub>N (14  $\mu$ L, 0.10 mmol) and the resulting solution was heated to reflux for 24 hours. The mixture was concentrated under reduced pressure, and the residue was purified via a short column of silica (10 cm) (EtOAc/petroleum spirit, 2:1) to afford **11a** (146 mg, 44 %) as a colourless solid. The data was identical to that obtained previously.



**Preparation of 11f using Appel conditions.** The reaction of **10f** (0.250 g, 0.67 mmol), PPh<sub>3</sub> (0.700 g, 2.68 mmol), CCl<sub>4</sub> (0.129 mL, 1.34 mmol) and Et<sub>3</sub>N (10  $\mu$ L, 0.071 mmol) in DCE (7 mL) as per the reaction of **10a** under Appel conditions afforded **11f** (83 mg, 32%) as a colourless solid. The data was identical to that obtained previously.

**Preparation of 12e using Appel conditions.** The reaction of **10e** (108 mg, 0.68 mmol), PPh<sub>3</sub> (716 mg, 2.73 mmol), CCl<sub>4</sub> (0.140 mL, 1.36 mmol) and Et<sub>3</sub>N (11  $\mu$ L, 0.078 mmol) in DCE (3.5 mL) as per the reaction of **10a** under Appel conditions, with purification by column chromatography using water treated silica (0.6 mL H<sub>2</sub>O in 30 mL SiO<sub>2</sub>) afforded **12e** (38 mg, 35%) as a colourless oil. The data was identical to that obtained previously.

**Preparation of 16 using Appel conditions.** The reaction of alcohol **15** (128 mg, 1.00 mmol), PPh<sub>3</sub> (1.042 g, 3.97 mmol), CCl<sub>4</sub> (237  $\mu$ L, 2.44 mmol) in DCE (5 mL) as per the reaction of **10a** under Appel conditions, with purification by flash chromatography (gradient elution of EtOAc/petroleum spirit, 4:21 to 1:4) afforded **16** (64 mg, 44%) as a colourless oil. The data was identical to that obtained previously.

**(1R,2R,5S)-2-Allyl-7,7-dibenzyl-3,8-dioxabicyclo[3.2.1]octane (21).** To a stirred solution of **11a** (251 mg, 0.763 mmol) and allyltrimethylsilane (260 mg, 2.28 mmol) in CH<sub>2</sub>Cl<sub>2</sub> (5 mL) was added AlCl<sub>3</sub> (118 mg, 0.885 mmol). After 30 minutes, the reaction was quenched by the addition of saturated aqueous NaHCO<sub>3</sub> (5 mL) and the mixture extracted with CH<sub>2</sub>Cl<sub>2</sub> (3  $\times$  5 mL). The combined organic layers were passed through a cotton pad and the volatiles removed under reduced pressure. Purification of the residue by flash column chromatography (EtOAc/petroleum spirit 1:9) afforded **21** (144 mg, 56%) as a colourless oil; *R*<sub>f</sub> 0.5 (EtOAc/petroleum spirit, 1:9); [ $\alpha$ ]<sub>D</sub><sup>29</sup> +10 (*c* 0.62, CH<sub>2</sub>Cl<sub>2</sub>); IR:  $\nu_{\max}$  3084, 3061, 3001, 3026, 2949, 2861, 1640, 1602, 1581, 1495 cm<sup>-1</sup>; <sup>1</sup>H NMR (500 MHz, CDCl<sub>3</sub>)  $\delta$  7.41–7.16 (m, 8H), 7.05–6.99 (m, 2H), 5.82 (dddd, *J* = 17.0, 10.1, 7.6, 6.8 Hz, 1H), 5.18–5.08 (m, 2H), 4.28–4.22 (m, 1H), 4.01 (dd, *J* = 11.2, 1.3 Hz, 1H), 3.84 (s, 1H), 3.79 (dd, *J* = 8.6, 5.9 Hz, 1H), 3.30–3.22 (m, 2H), 2.94 (d, *J* = 15.1 Hz, 1H), 2.87–2.75 (m, 3H), 2.49–2.42 (m, 1H), 2.20–2.12 (m, 2H); <sup>13</sup>C{<sup>1</sup>H} NMR (125 MHz, CDCl<sub>3</sub>)  $\delta$  139.6, 139.0, 134.8, 130.5, 129.9, 128.4, 127.9, 126.1, 126.0, 117.3, 81.2, 75.8, 72.0, 66.1, 48.7, 43.4, 39.9, 38.5, 33.9; HRMS (ESI-TOF) *m/z*: [M+H]<sup>+</sup> calcd for C<sub>23</sub>H<sub>27</sub>O<sub>2</sub>: 335.2006; found: 335.1997

**(1R,2R,5S)-7,7-Dibenzyl-2-(4-methoxyphenyl)-3,8-dioxabicyclo[3.2.1]octane (22).** To a stirred solution of **11a** (445 mg, 1.35 mmol) and anisole (499 mg, 4.61 mmol) in DCE (7 mL) was added AlCl<sub>3</sub> (263 mg, 1.97 mmol) and the resulting solution was stirred for 30 min. The reaction was quenched by the addition of saturated aqueous NaHCO<sub>3</sub> (20 mL) and extracted with CH<sub>2</sub>Cl<sub>2</sub> (2 × 50 mL). The combined organics were dried over Na<sub>2</sub>SO<sub>4</sub>, filtered and the volatiles removed under reduced pressure. Purification of the residue by flash column chromatography (EtOAc/petroleum spirit 1:2) afforded **22** (195 mg, 36%) as a colourless viscous oil; *R*<sub>f</sub> 0.4 (EtOAc/petroleum spirit; 1:2); [α]<sub>D</sub><sup>29</sup> +7 (*c* 0.67, CH<sub>2</sub>Cl<sub>2</sub>); IR: ν<sub>max</sub> 3062, 3026, 2999, 2913, 2871, 2851, 2838, 1611, 1604, 1582, 1512 cm<sup>-1</sup>; <sup>1</sup>H NMR (500 MHz, CDCl<sub>3</sub>) δ 7.33–7.10 (m, 12H), 6.93–6.88 (m, 2H), 4.27 (d, *J* = 6.5 Hz, 1H), 4.02 (d, *J* = 6.5 Hz, 1H), 3.95–3.89 (m, 1H), 3.82 (s, 3H), 3.66 (dd, *J* = 11.8, 2.9 Hz, 1H), 3.36 (dd, *J* = 11.8, 4.4 Hz, 1H), 2.86 (d, *J* = 14.6 Hz, 1H), 2.66 (d, *J* = 13.4 Hz, 1H), 2.52 (*J* = 14.6 Hz, 1H), 2.50 (d, *J* = 13.4 Hz, 1H), 2.10 (dd, *J* = 12.7, 5.4 Hz, 1H), 1.54 (dd, *J* = 12.7, 11.1 Hz, 1H); <sup>13</sup>C{<sup>1</sup>H} NMR (125 MHz, CDCl<sub>3</sub>) δ 158.3, 139.0, 138.0, 137.5, 131.7, 130.7, 129.8, 128.3, 128.2, 128.1, 126.7, 126.7, 126.5, 114.1, 89.9, 77.8, 63.6, 55.3, 51.0, 48.3, 45.5, 39.5, 38.3; HRMS (ESI-TOF) *m/z*: [M+Na]<sup>+</sup> calcd for C<sub>27</sub>H<sub>28</sub>NaO<sub>3</sub>: 423.1931; found: 423.1948.

**(1R,2R,5S)-7,7-Dibenzyl-2-(4-phenoxyphenyl)-3,8-dioxabicyclo[3.2.1]octane (23).** To a stirred solution of **11a** (315 mg, 0.958 mmol) and diphenyl ether (885 mg, 5.20 mmol) in DCE (10 mL) was added AlCl<sub>3</sub> (175 mg, 1.31 mmol) and the resulting solution was stirred for 5 min. The reaction was quenched by the addition of saturated aqueous NaHCO<sub>3</sub> (20 mL) then extracted with CH<sub>2</sub>Cl<sub>2</sub> (2 × 30 mL). Purification of the residue by flash column chromatography (EtOAc/petroleum spirit 3:7) afforded **23** (236 mg, 53%) as a glassy solid; *R*<sub>f</sub> 0.4 (EtOAc/petroleum spirit, 3:7); [α]<sub>D</sub><sup>25</sup> –5 (*c* 0.62, CH<sub>2</sub>Cl<sub>2</sub>); IR: ν<sub>max</sub> 3062, 3025, 2918, 2871, 1589, 1504, 1488 cm<sup>-1</sup>; <sup>1</sup>H NMR (500 MHz, CDCl<sub>3</sub>) δ 7.39–7.17 (m, 9H), 7.16–7.09 (m, 5H), 7.08–7.03 (m, 2H), 7.02–6.98 (m, 2H), 6.95–6.90 (m, 1H), 4.31 (d, *J* = 6.2 Hz, 1H), 4.07 (d, *J* = 6.2 Hz, 1H), 3.97–3.91 (m, 1H), 3.68 (dd, *J* = 11.8, 2.8 Hz, 1H), 3.38 (dd, *J* = 11.8, 4.4 Hz, 1H), 2.87 (d, *J* = 14.6 Hz, 1H), 2.68 (d, *J* = 13.4 Hz, 1H), 2.53 (d, *J* = 14.6 Hz, 1H), 2.53 (d, *J* = 13.4 Hz, 1H), 2.11 (dd, *J* = 12.7, 5.3 Hz, 1H), 1.56 (dd, *J* = 12.7, 10.4 Hz, 1H); <sup>13</sup>C{<sup>1</sup>H} NMR (125 MHz, CDCl<sub>3</sub>) δ 157.1, 155.9, 138.6, 137.9, 137.5, 134.5, 130.7, 130.1, 129.7, 128.4, 128.2, 128.1, 126.8, 126.7, 126.5, 123.3, 119.0, 118.9, 89.7, 77.9, 63.7, 51.1, 48.3, 45.5, 39.4, 38.3; HRMS (ESI-TOF) *m/z*: [M+Na]<sup>+</sup> calcd for C<sub>32</sub>H<sub>30</sub>NaO<sub>3</sub>: 485.2087; found: 485.2096.

**(1R,5S)-7,7-Dibenzyl-3,8-dioxabicyclo[3.2.1]octan-2-one (24).** To a stirred solution of **12a** (618 mg, 1.99 mmol) in DCE (25 mL) was added iodobenzene diacetate (658 mg, 2.04 mmol) and TEMPO (37 mg, 0.24 mmol) and the resulting mixture stirred overnight at ambient temperature. The volatiles were removed under reduced pressure and the residue subjected to flash column chromatography

(EtOAc/petroleum spirit 1:3), affording **24** (247 mg, 40%) as a white solid. Crystals suitable for X-ray crystallography were prepared by slow evaporation from an *i*-Pr<sub>2</sub>O solution; *R<sub>f</sub>* 0.3 (EtOAc/petroleum spirit, 1:3); mp 125–128 °C;  $[\alpha]_D^{23}$  –39 (*c* 0.40, CH<sub>2</sub>Cl<sub>2</sub>); IR:  $\nu_{\text{max}}$  3085, 3059, 3028, 2958, 2924, 2898, 2856, 1745, 1603, 1583, 1496 cm<sup>–1</sup>; <sup>1</sup>H NMR (500 MHz, CDCl<sub>3</sub>)  $\delta$  7.38–7.30 (m, 4H), 7.29–7.20 (m, 4H), 7.09–7.05 (m, 2H), 4.60–4.52 (m, 2H), 4.46 (s, 1H), 4.13 (d, *J* = 10.5 Hz, 1H), 2.95 (d, *J* = 15.0 Hz, 1H), 2.87 (d, *J* = 13.8 Hz, 1H), 2.72 (d, *J* = 13.8 Hz, 1H), 2.70 (d, *J* = 15.0 Hz, 1H), 2.28 (dd, *J* = 13.0, 8.0 Hz, 1H), 2.14 (dd, *J* = 13.0, 2.0 Hz, 1H); <sup>13</sup>C{<sup>1</sup>H} NMR (125 MHz, CDCl<sub>3</sub>)  $\delta$  167.4, 137.9, 137.5, 130.3, 130.0, 128.5, 128.3, 126.7, 126.6, 81.8, 74.7, 72.2, 51.9, 42.0, 40.0, 38.8; HRMS (ESI-TOF) *m/z*: [M+Na]<sup>+</sup> calcd for C<sub>20</sub>H<sub>20</sub>NaO<sub>3</sub>: 331.1305; found: 331.1318.

## Single crystal X-ray crystallography

Single crystal of were mounted in Paratone-N oil on a MiTeGen micromount. X-ray diffraction data were collected at temperatures between 100(2) K – 119(2) K (as specified) on a Rigaku-Oxford Diffraction Synergy single crystal diffractometer using Cu K $\alpha$  radiation or at 150(2) K on a Oxford Diffraction Xcalibur single crystal diffractometer using Mo K $\alpha$  radiation.[4] The data sets were corrected for absorption using a multi-scan method, and the structures solved by intrinsic phasing (SHELXT)[5] and refined by full-matrix least squares on F2 by SHELXL,[6] interfaced through the programs X-Seed (version 4)[7] and Olex2.3.[8] All non-hydrogen atoms were refined with anisotropic displacement parameters and hydrogen atoms were included as invariants at geometrically estimated positions.

For all compounds, the absolute structure was determined by anomalous dispersion effects and reference to the chiral starting material, where chirality at C1 (starting material) should be retained in all products. For compounds **10d** and **12d** the Flack and Hooft y parameters poorly defined, but examination of the Bijvoet pairs using the Hooft method suggests that the compounds are correctly assigned, although the analysis is not conclusive for **10d**. For **10d** P2(true) = 0.989, P3(true) = 0.114 and P3(rac-twin) = 0.885; **12d** P2(true) = 1.000, P3(true) = 1.000 and P3(rac-twin) = 0.000. This was true for multiple crystals of **10d**.

Tables S1–S3 list the X-ray experimental data and refinement parameters for the crystal structures. Perspective views of the asymmetric units of the structures and other salient features are shown in Figures S1–S9.

Full details of the structure determination have been deposited with the Cambridge Crystallographic Data Centre as CSD 2327007-2327015 (compounds **10d** – 2327007; **10e** – 2327012; **11a** – 2327010; **11d** – 2327015; **11e** – 2327008; **12a** – 2327013; **12d** – 2327009; **13b** – 2327011 and **24** – 2327014). Copies of this information may be obtained free of charge from The Director, CCDC, 12 Union Street, Cambridge CB2 1EZ, U.K. (fax, +44-1223-336-033; e-mail, [deposit@ccdc.cam.ac.uk](mailto:deposit@ccdc.cam.ac.uk)).

**Table S1.** X-ray experimental data and refinement parameters for **10d**, **10e** and **11a**.

| Compound                                       | <b>10d</b>                                                       | <b>10e</b>                                                          | <b>11a</b>                                                       |
|------------------------------------------------|------------------------------------------------------------------|---------------------------------------------------------------------|------------------------------------------------------------------|
| CCDC number                                    | 2327007                                                          | 2327012                                                             | 2327010                                                          |
| Identification code                            | cyroxOH2_auto                                                    | exp_211_auto                                                        | JKAux04Cl01                                                      |
| Empirical formula                              | C <sub>14</sub> H <sub>16</sub> O <sub>3</sub>                   | C <sub>8</sub> H <sub>14</sub> O <sub>3</sub>                       | C <sub>20</sub> H <sub>21</sub> ClO <sub>2</sub>                 |
| Formula weight                                 | 232.27                                                           | 158.19                                                              | 328.82                                                           |
| Temperature/K                                  | 100(2)                                                           | 104(2)                                                              | 150(2)                                                           |
| Crystal system                                 | monoclinic                                                       | trigonal                                                            | monoclinic                                                       |
| Space group                                    | P2 <sub>1</sub>                                                  | P3 <sub>2</sub>                                                     | P2 <sub>1</sub>                                                  |
| a/Å                                            | 8.8024(3)                                                        | 10.9631(2)                                                          | 6.7910(3)                                                        |
| b/Å                                            | 5.9126(2)                                                        | 10.9631(2)                                                          | 9.0122(3)                                                        |
| c/Å                                            | 11.0209(3)                                                       | 5.92714(15)                                                         | 27.4291(11)                                                      |
| α/°                                            | 90                                                               | 90                                                                  | 90                                                               |
| β/°                                            | 89.984(3)                                                        | 90                                                                  | 89.864(4)                                                        |
| γ/°                                            | 90                                                               | 120                                                                 | 90                                                               |
| Volume/Å <sup>3</sup>                          | 573.58(3)                                                        | 616.93(3)                                                           | 1678.71(11)                                                      |
| Z                                              | 2                                                                | 3                                                                   | 4                                                                |
| ρ <sub>calc</sub> /g/cm <sup>3</sup>           | 1.345                                                            | 1.277                                                               | 1.301                                                            |
| μ/mm <sup>-1</sup>                             | 0.761                                                            | 0.798                                                               | 0.235                                                            |
| F(000)                                         | 248.0                                                            | 258.0                                                               | 696.0                                                            |
| Crystal size/mm <sup>3</sup>                   | 0.325 × 0.176 ×<br>0.047                                         | 0.293 × 0.043 ×<br>0.019                                            | 0.5 × 0.38 × 0.2                                                 |
| Radiation                                      | Cu Kα (λ = 1.54184)                                              | Cu Kα (λ =<br>1.54184)                                              | Mo Kα (λ =<br>0.71073)                                           |
| 2Θ range for data<br>collection/°              | 8.022 to 159.448                                                 | 9.314 to 156.058                                                    | 7.428 to 58.286                                                  |
| Index ranges                                   | -11 ≤ h ≤ 11, -7 ≤ k<br>≤ 7, -13 ≤ l ≤ 13                        | -13 ≤ h ≤ 13, -13 ≤<br>k ≤ 13, -7 ≤ l ≤ 7                           | -8 ≤ h ≤ 9, -10 ≤ k<br>≤ 12, -35 ≤ l ≤ 37                        |
| Reflections collected                          | 9494                                                             | 12359                                                               | 11095                                                            |
| Independent reflections                        | 2400 [R <sub>int</sub> = 0.0830,<br>R <sub>sigma</sub> = 0.0620] | 1734 [R <sub>int</sub> =<br>0.0551, R <sub>sigma</sub> =<br>0.0318] | 6123 [R <sub>int</sub> = 0.0330,<br>R <sub>sigma</sub> = 0.0612] |
| Data/restraints/parameters                     | 2400/1/155                                                       | 1734/1/104                                                          | 6123/1/415                                                       |
| Goodness-of-fit on F <sup>2</sup>              | 1.072                                                            | 1.127                                                               | 1.044                                                            |
| Final R indexes [I ≥ 2σ<br>(I)]                | R <sub>1</sub> = 0.0462, wR <sub>2</sub> =<br>0.1160             | R <sub>1</sub> = 0.0298, wR <sub>2</sub> =<br>0.0816                | R <sub>1</sub> = 0.0488, wR <sub>2</sub> =<br>0.0910             |
| Final R indexes [all data]                     | R <sub>1</sub> = 0.0513, wR <sub>2</sub> =<br>0.1267             | R <sub>1</sub> = 0.0303, wR <sub>2</sub> =<br>0.0817                | R <sub>1</sub> = 0.0681, wR <sub>2</sub> =<br>0.0974             |
| Largest diff. peak/hole / e<br>Å <sup>-3</sup> | 0.31/-0.23                                                       | 0.16/-0.15                                                          | 0.35/-0.33                                                       |
| Flack parameter                                | 0.4(2)                                                           | -0.05(15)                                                           | 0.03(4)                                                          |

**Table S2.** X-ray experimental data and refinement parameters for **11d**, **11e** and **12a**.

| Compound                                       | <b>11d</b>                                                       | <b>11e</b>                                                       | <b>12a</b>                                                          |
|------------------------------------------------|------------------------------------------------------------------|------------------------------------------------------------------|---------------------------------------------------------------------|
| CCDC number                                    | 2327015                                                          | 2327008                                                          | 2327013                                                             |
| Identification code                            | cyroxRCl_auto                                                    | cyrM2RCl_auto                                                    | exp_227_auto                                                        |
| Empirical formula                              | C <sub>14</sub> H <sub>15</sub> ClO <sub>2</sub>                 | C <sub>8</sub> H <sub>13</sub> ClO <sub>2</sub>                  | C <sub>40</sub> H <sub>44</sub> O <sub>6</sub>                      |
| Formula weight                                 | 250.71                                                           | 176.63                                                           | 620.75                                                              |
| Temperature/K                                  | 107(2)                                                           | 104(2)                                                           | 110(2)                                                              |
| Crystal system                                 | orthorhombic                                                     | monoclinic                                                       | triclinic                                                           |
| Space group                                    | P2 <sub>1</sub> 2 <sub>1</sub> 2 <sub>1</sub>                    | P2 <sub>1</sub>                                                  | P1                                                                  |
| a/Å                                            | 6.01671(12)                                                      | 5.85210(10)                                                      | 6.31790(10)                                                         |
| b/Å                                            | 8.00444(16)                                                      | 9.16200(10)                                                      | 9.1992(2)                                                           |
| c/Å                                            | 24.6468(4)                                                       | 7.97400(10)                                                      | 13.8173(3)                                                          |
| α/°                                            | 90                                                               | 90                                                               | 82.676(2)                                                           |
| β/°                                            | 90                                                               | 95.7800(10)                                                      | 86.756(2)                                                           |
| γ/°                                            | 90                                                               | 90                                                               | 89.6190(10)                                                         |
| Volume/Å <sup>3</sup>                          | 1187.00(4)                                                       | 425.368(10)                                                      | 795.23(3)                                                           |
| Z                                              | 4                                                                | 2                                                                | 1                                                                   |
| ρ <sub>calc</sub> /g/cm <sup>3</sup>           | 1.403                                                            | 1.379                                                            | 1.296                                                               |
| μ/mm <sup>-1</sup>                             | 2.735                                                            | 3.562                                                            | 0.685                                                               |
| F(000)                                         | 528.0                                                            | 188.0                                                            | 332.0                                                               |
| Crystal size/mm <sup>3</sup>                   | 0.166 × 0.124 ×<br>0.038                                         | 0.347 × 0.174 ×<br>0.084                                         | 0.132 × 0.072 ×<br>0.041                                            |
| Radiation                                      | Cu Kα (λ =<br>1.54184)                                           | Cu Kα (λ = 1.54184)                                              | Cu Kα (λ =<br>1.54184)                                              |
| 2Θ range for data<br>collection/°              | 7.174 to 159.98                                                  | 11.152 to 158.894                                                | 6.46 to 159.102                                                     |
| Index ranges                                   | -7 ≤ h ≤ 6, -9 ≤ k ≤<br>10, -24 ≤ l ≤ 31                         | -7 ≤ h ≤ 7, -11 ≤ k ≤<br>11, -8 ≤ l ≤ 10                         | -8 ≤ h ≤ 8, -11 ≤ k<br>≤ 11, -16 ≤ l ≤ 17                           |
| Reflections collected                          | 12493                                                            | 14354                                                            | 48726                                                               |
| Independent reflections                        | 2539 [R <sub>int</sub> = 0.0409,<br>R <sub>sigma</sub> = 0.0275] | 1815 [R <sub>int</sub> = 0.0456,<br>R <sub>sigma</sub> = 0.0198] | 6120 [R <sub>int</sub> =<br>0.0461, R <sub>sigma</sub> =<br>0.0237] |
| Data/restraints/parameters                     | 2539/0/155                                                       | 1815/1/103                                                       | 6120/3/417                                                          |
| Goodness-of-fit on F <sup>2</sup>              | 1.055                                                            | 1.116                                                            | 1.043                                                               |
| Final R indexes [I ≥ 2σ<br>(I)]                | R <sub>1</sub> = 0.0295, wR <sub>2</sub> =<br>0.0731             | R <sub>1</sub> = 0.0293, wR <sub>2</sub> =<br>0.0767             | R <sub>1</sub> = 0.0406, wR <sub>2</sub> =<br>0.1142                |
| Final R indexes [all data]                     | R <sub>1</sub> = 0.0310, wR <sub>2</sub> =<br>0.0740             | R <sub>1</sub> = 0.0296, wR <sub>2</sub> =<br>0.0770             | R <sub>1</sub> = 0.0421, wR <sub>2</sub> =<br>0.1159                |
| Largest diff. peak/hole / e<br>Å <sup>-3</sup> | 0.24/-0.22                                                       | 0.20/-0.22                                                       | 0.40/-0.17                                                          |
| Flack parameter                                | -0.026(8)                                                        | -0.019(15)                                                       | 0.02(7)                                                             |

**Table S3.** X-ray experimental data and refinement parameters for **12d**, **13b** and **24**.

| Compound                                       | <b>12d</b>                                                          | <b>13b</b>                                                          | <b>24</b>                                                        |
|------------------------------------------------|---------------------------------------------------------------------|---------------------------------------------------------------------|------------------------------------------------------------------|
| CCDC number                                    | 2327009                                                             | 2327011                                                             | 2327014                                                          |
| Identification code                            | cyroxROH_auto                                                       | exp_226_auto                                                        | cyBn2Rlactone_auto                                               |
| Empirical formula                              | C <sub>14</sub> H <sub>16</sub> O <sub>3</sub>                      | C <sub>12</sub> H <sub>18</sub> O <sub>7</sub> S                    | C <sub>40</sub> H <sub>40</sub> O <sub>6</sub>                   |
| Formula weight                                 | 232.27                                                              | 306.32                                                              | 616.72                                                           |
| Temperature/K                                  | 105(2)                                                              | 119(2)                                                              | 100(2)                                                           |
| Crystal system                                 | orthorhombic                                                        | monoclinic                                                          | triclinic                                                        |
| Space group                                    | P2 <sub>1</sub> 2 <sub>1</sub> 2 <sub>1</sub>                       | P2 <sub>1</sub>                                                     | P1                                                               |
| a/Å                                            | 5.8349(3)                                                           | 5.60610(10)                                                         | 6.4634(2)                                                        |
| b/Å                                            | 10.8824(6)                                                          | 10.52160(10)                                                        | 9.4715(3)                                                        |
| c/Å                                            | 17.3475(10)                                                         | 11.6074(2)                                                          | 13.2656(4)                                                       |
| α/°                                            | 90                                                                  | 90                                                                  | 83.742(2)                                                        |
| β/°                                            | 90                                                                  | 103.364(2)                                                          | 82.764(2)                                                        |
| γ/°                                            | 90                                                                  | 90                                                                  | 89.338(2)                                                        |
| Volume/Å <sup>3</sup>                          | 1101.52(11)                                                         | 666.124(18)                                                         | 800.82(4)                                                        |
| Z                                              | 4                                                                   | 2                                                                   | 1                                                                |
| ρ <sub>calc</sub> /g/cm <sup>3</sup>           | 1.401                                                               | 1.527                                                               | 1.279                                                            |
| μ/mm <sup>-1</sup>                             | 0.792                                                               | 2.459                                                               | 0.680                                                            |
| F(000)                                         | 496.0                                                               | 324.0                                                               | 328.0                                                            |
| Crystal size/mm <sup>3</sup>                   | 0.345 × 0.128 ×<br>0.072                                            | 0.155 × 0.092 ×<br>0.086                                            | 0.228 × 0.096 × 0.075                                            |
| Radiation                                      | Cu Kα (λ =<br>1.54184)                                              | Cu Kα (λ =<br>1.54184)                                              | Cu Kα (λ = 1.54184)                                              |
| 2Θ range for data<br>collection/°              | 9.594 to 159.192                                                    | 7.828 to 158.416                                                    | 6.756 to 158.644                                                 |
| Index ranges                                   | -6 ≤ h ≤ 7, -13 ≤ k<br>≤ 13, -21 ≤ l ≤ 22                           | -7 ≤ h ≤ 6, -13 ≤<br>k ≤ 13, -14 ≤ l ≤<br>14                        | -8 ≤ h ≤ 7, -12 ≤ k ≤<br>11, -16 ≤ l ≤ 16                        |
| Reflections collected                          | 12424                                                               | 22263                                                               | 28803                                                            |
| Independent reflections                        | 2345 [R <sub>int</sub> =<br>0.0615, R <sub>sigma</sub> =<br>0.0323] | 2831 [R <sub>int</sub> =<br>0.0415, R <sub>sigma</sub> =<br>0.0201] | 6044 [R <sub>int</sub> = 0.0413,<br>R <sub>sigma</sub> = 0.0285] |
| Data/restraints/parameters                     | 2345/0/156                                                          | 2831/1/181                                                          | 6044/3/415                                                       |
| Goodness-of-fit on F <sup>2</sup>              | 1.050                                                               | 1.043                                                               | 1.055                                                            |
| Final R indexes [I ≥ 2σ<br>(I)]                | R <sub>1</sub> = 0.0518, wR <sub>2</sub> =<br>0.1286                | R <sub>1</sub> = 0.0612, wR <sub>2</sub><br>= 0.1690                | R <sub>1</sub> = 0.0339, wR <sub>2</sub> =<br>0.0916             |
| Final R indexes [all data]                     | R <sub>1</sub> = 0.0534, wR <sub>2</sub> =<br>0.1297                | R <sub>1</sub> = 0.0621, wR <sub>2</sub><br>= 0.1706                | R <sub>1</sub> = 0.0358, wR <sub>2</sub> =<br>0.0936             |
| Largest diff. peak/hole / e<br>Å <sup>-3</sup> | 0.29/-0.35                                                          | 1.46/-0.49                                                          | 0.19/-0.19                                                       |
| Flack parameter                                | -0.18(18)                                                           | 0.000(7)                                                            | 0.06(8)                                                          |

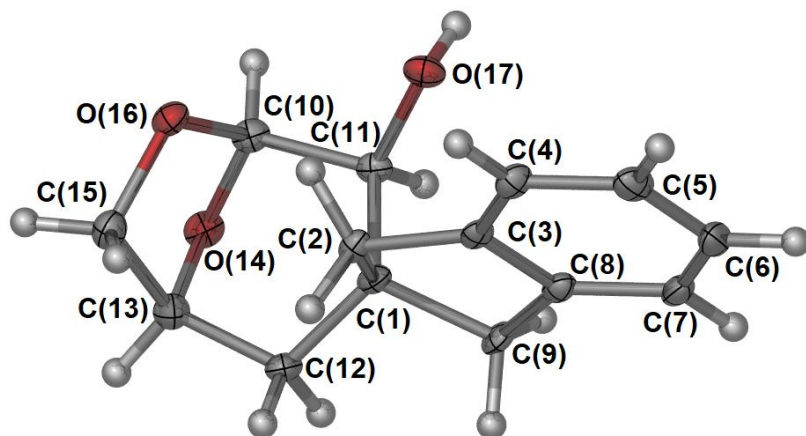

**Figure S1.** Perspective view of the labelled asymmetric unit showing the structure of **10d**, with the ellipsoids shown at 50% probability level. Carbon – grey, hydrogen – white and oxygen – red.

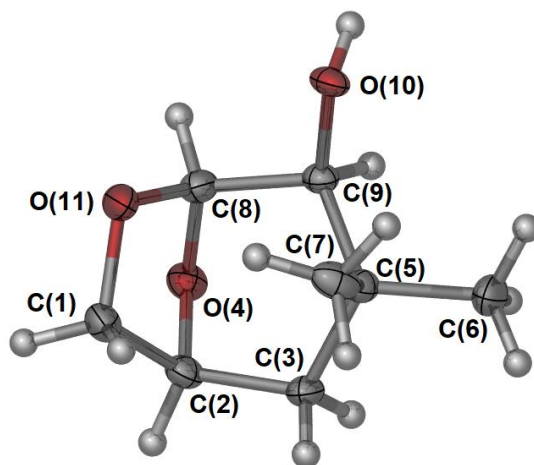

**Figure S2.** Perspective view of the labelled asymmetric unit showing the structure of **10e**, with the ellipsoids shown at 50% probability level. Carbon – grey, hydrogen – white and oxygen – red.



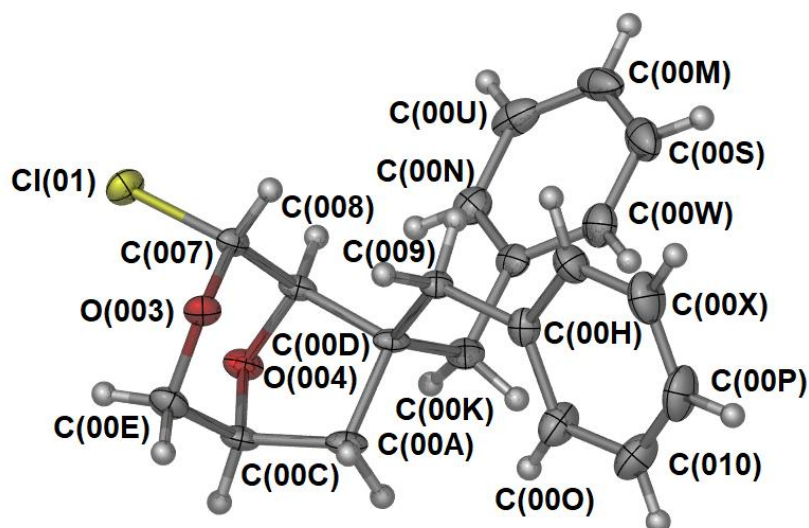

**Figure S3.** Perspective view of the labelled asymmetric unit of **11a** (showing one of the two molecules) with the ellipsoids shown at 50% probability level. Carbon – grey, hydrogen – white, oxygen – red, and chlorine – yellow.

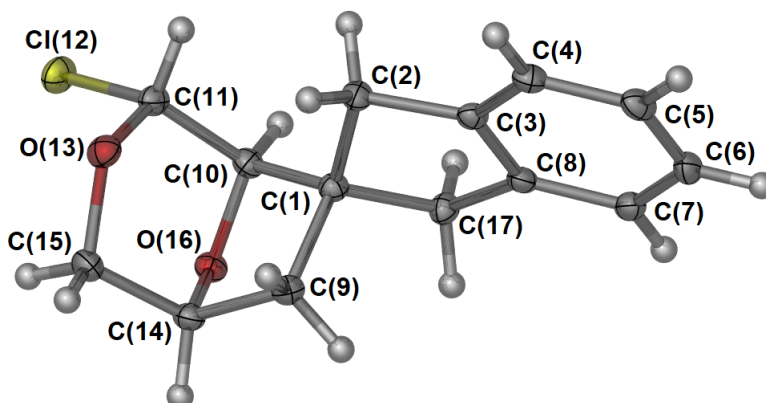

**Figure S4.** Perspective view of the labelled asymmetric unit showing the structure of **11d**, with the ellipsoids shown at 50% probability level. Carbon – grey, hydrogen – white, oxygen – red and chloride – yellow.

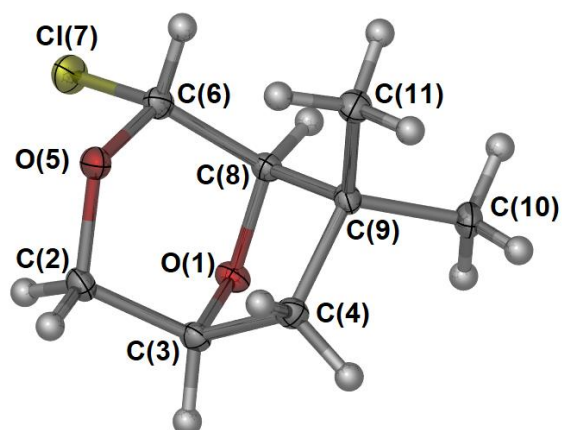

**Figure S5.** Perspective view of the labelled asymmetric unit showing the structure of **11e**, with the ellipsoids shown at 50% probability level. Carbon – grey, hydrogen – white, oxygen – red and chloride – yellow.

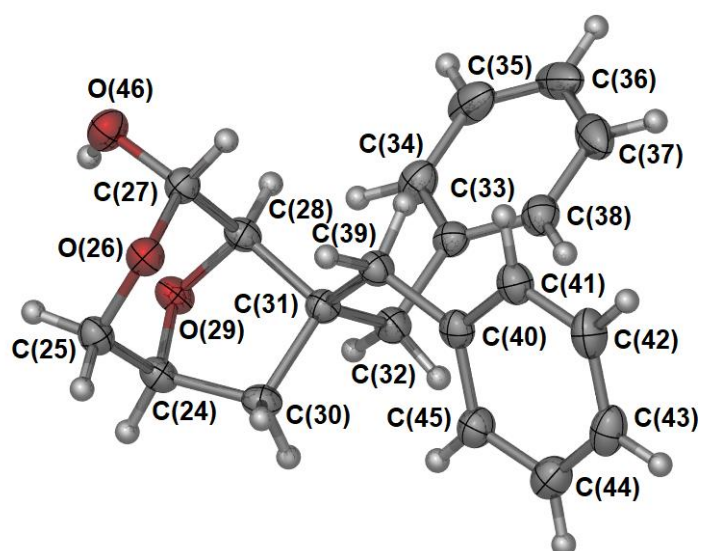

**Figure S6.** Perspective view of the labelled asymmetric unit of **12a** (showing one of the two molecules) with the ellipsoids shown at 50% probability level. Carbon – grey, hydrogen – white and oxygen – red.

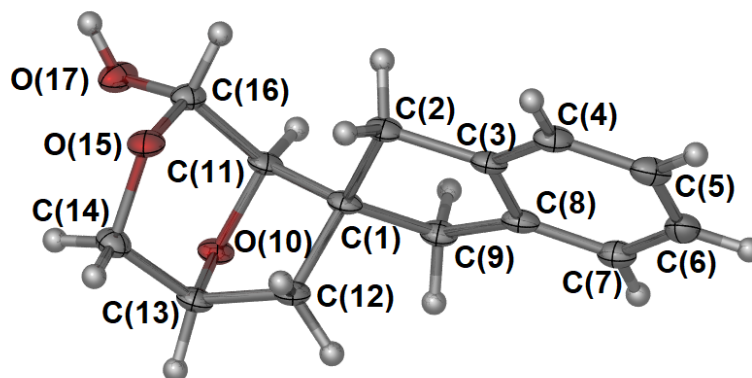

**Figure S7.** Perspective view of the labelled asymmetric unit showing the structure of **12d**, with the ellipsoids shown at 50% probability level. Carbon – grey, hydrogen – white and oxygen – red.

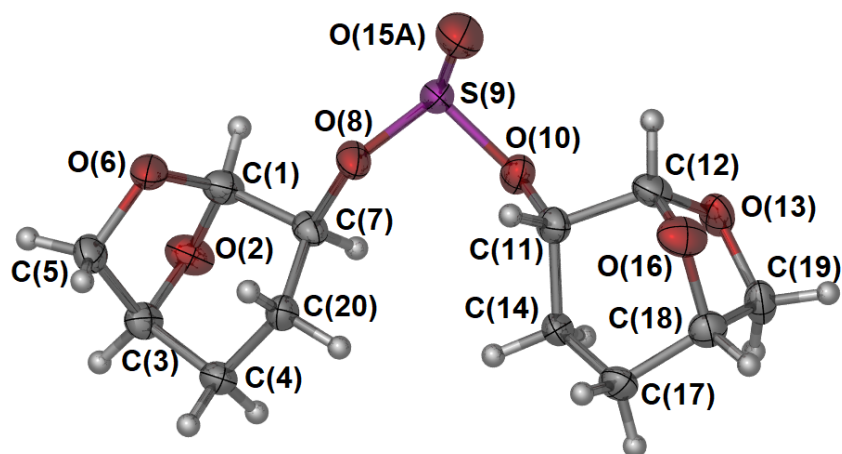

**Figure S8.** Perspective view of the labelled asymmetric unit showing the structure of **13b**, with the ellipsoids shown at 50% probability level. Carbon – grey, hydrogen – white, oxygen – red and sulfur – pink.

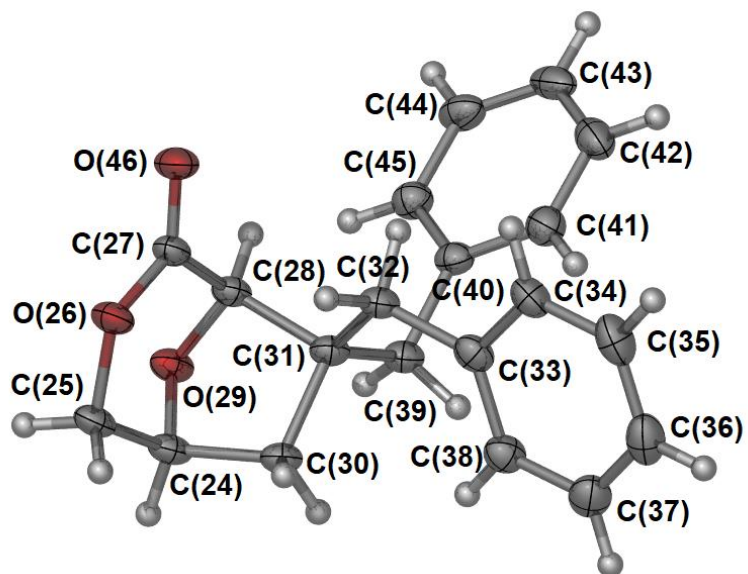

**Figure S9.** Perspective view of the labelled asymmetric unit of **24** (showing one of the two molecules), with the ellipsoids shown at 50% probability level. Carbon – grey, hydrogen – white and oxygen – red.

Copies of  $^1\text{H}$  and  $^{13}\text{C}\{^1\text{H}\}$  NMR spectra

$^1\text{H}$  NMR of (1*S*,5*R*)-1',3'-Dihydro-6,8-dioxaspiro[bicyclo[3.2.1]octane-3,2'-inden]-4-one (9d)

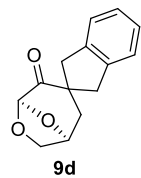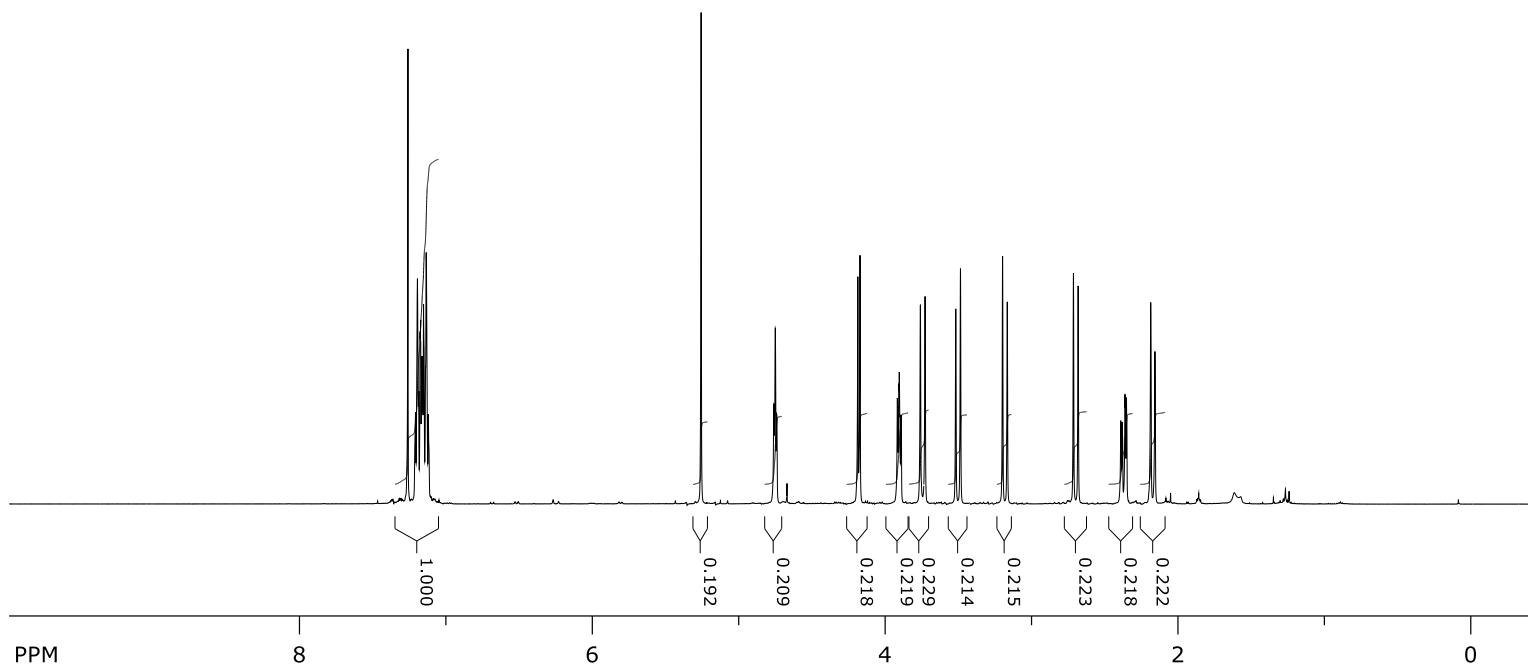

**$^{13}\text{C}\{^1\text{H}\}$  NMR of (1*S*,5*R*)-1',3'-Dihydro-6,8-dioxaspiro[bicyclo[3.2.1]octane-3,2'-inden]-4-one (9d)**

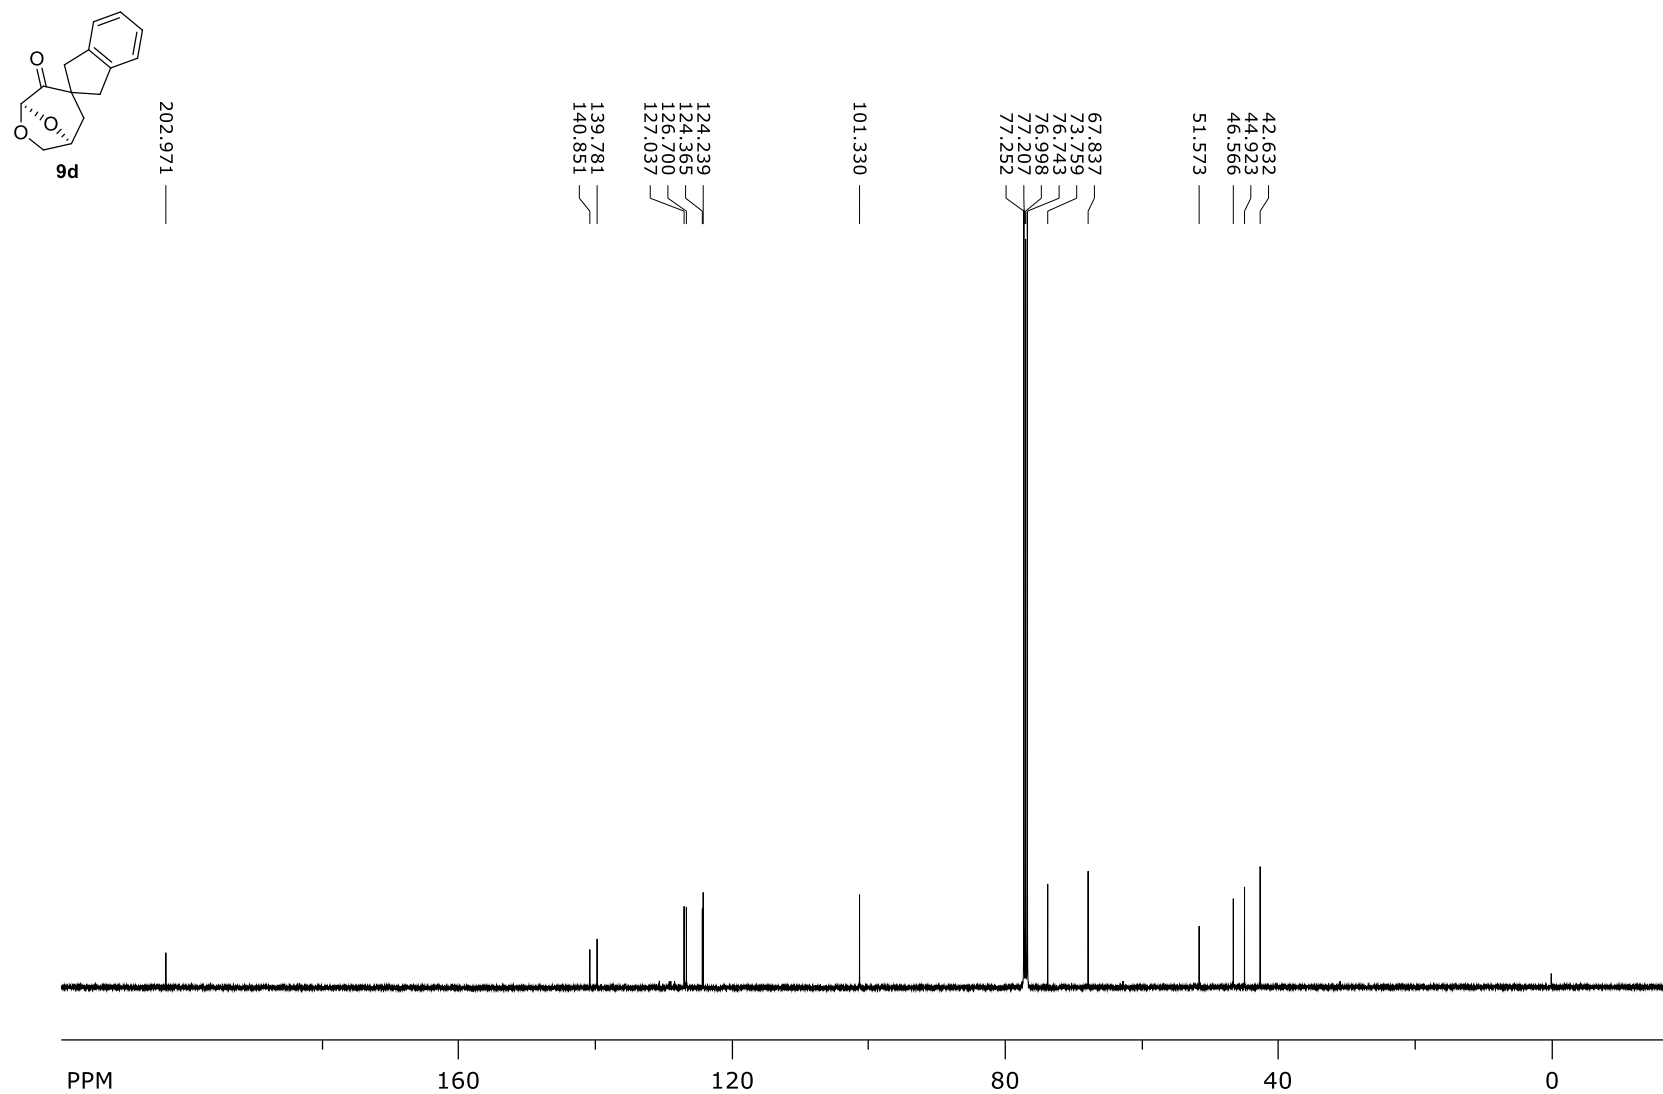

**$^1\text{H}$  NMR of (1*S*,5*R*)-3,3-Dimethyl-6,8-dioxabicyclo[3.2.1]octan-4-one (9e)**

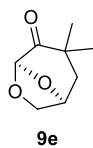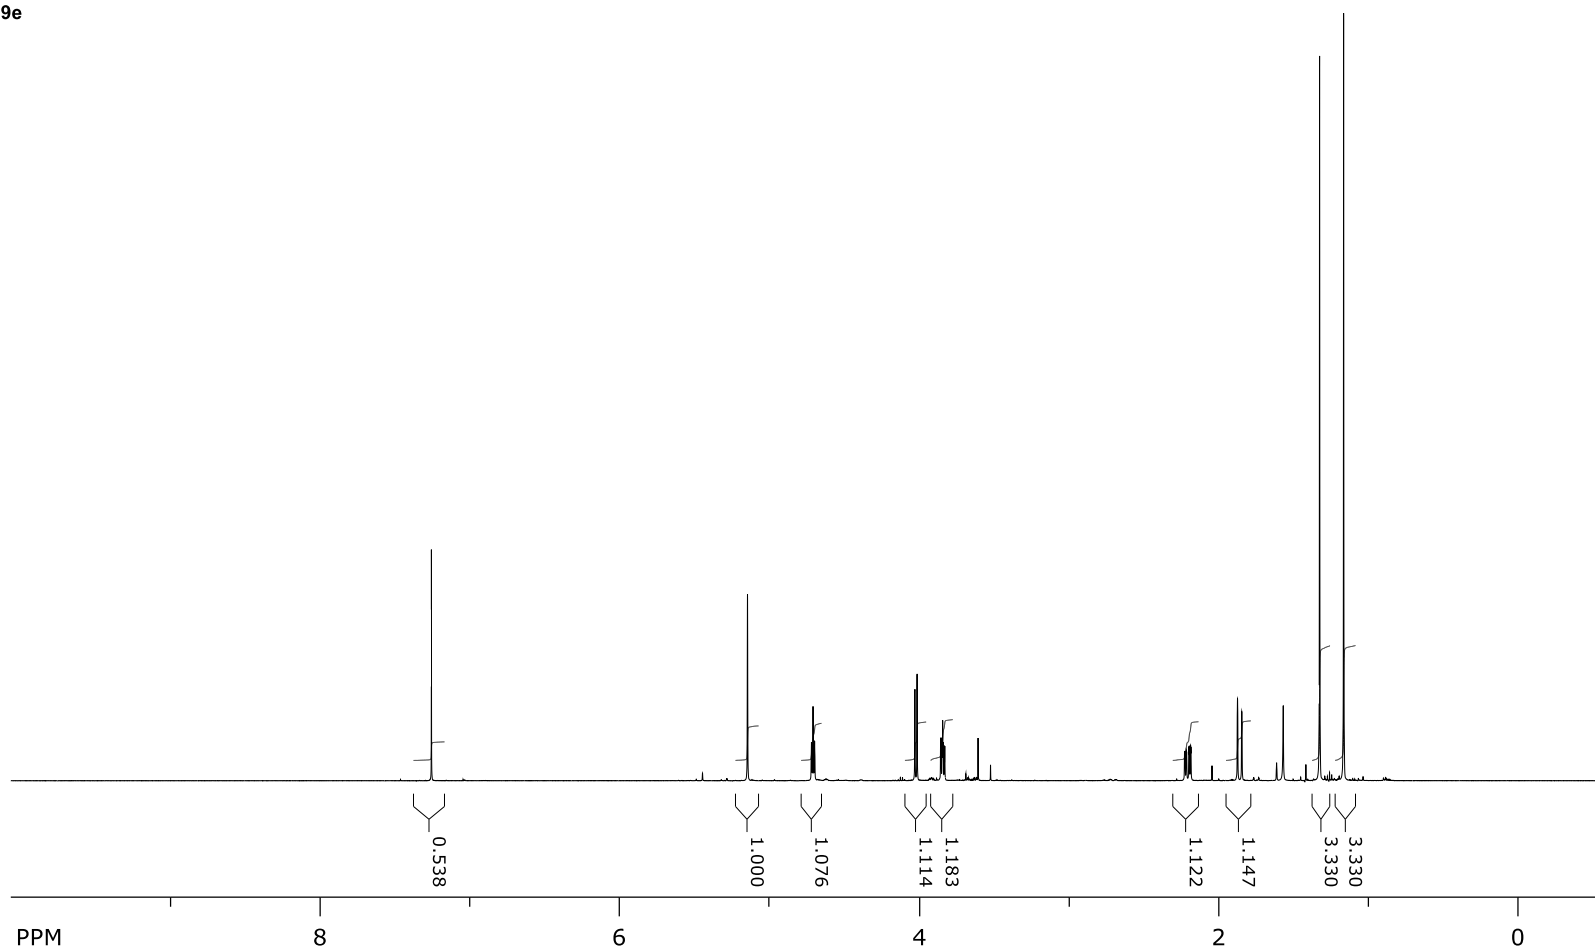

$^{13}\text{C}\{^1\text{H}\}$  NMR of (1*S*,5*R*)-3,3-Dimethyl-6,8-dioxabicyclo[3.2.1]octan-4-one (9e)

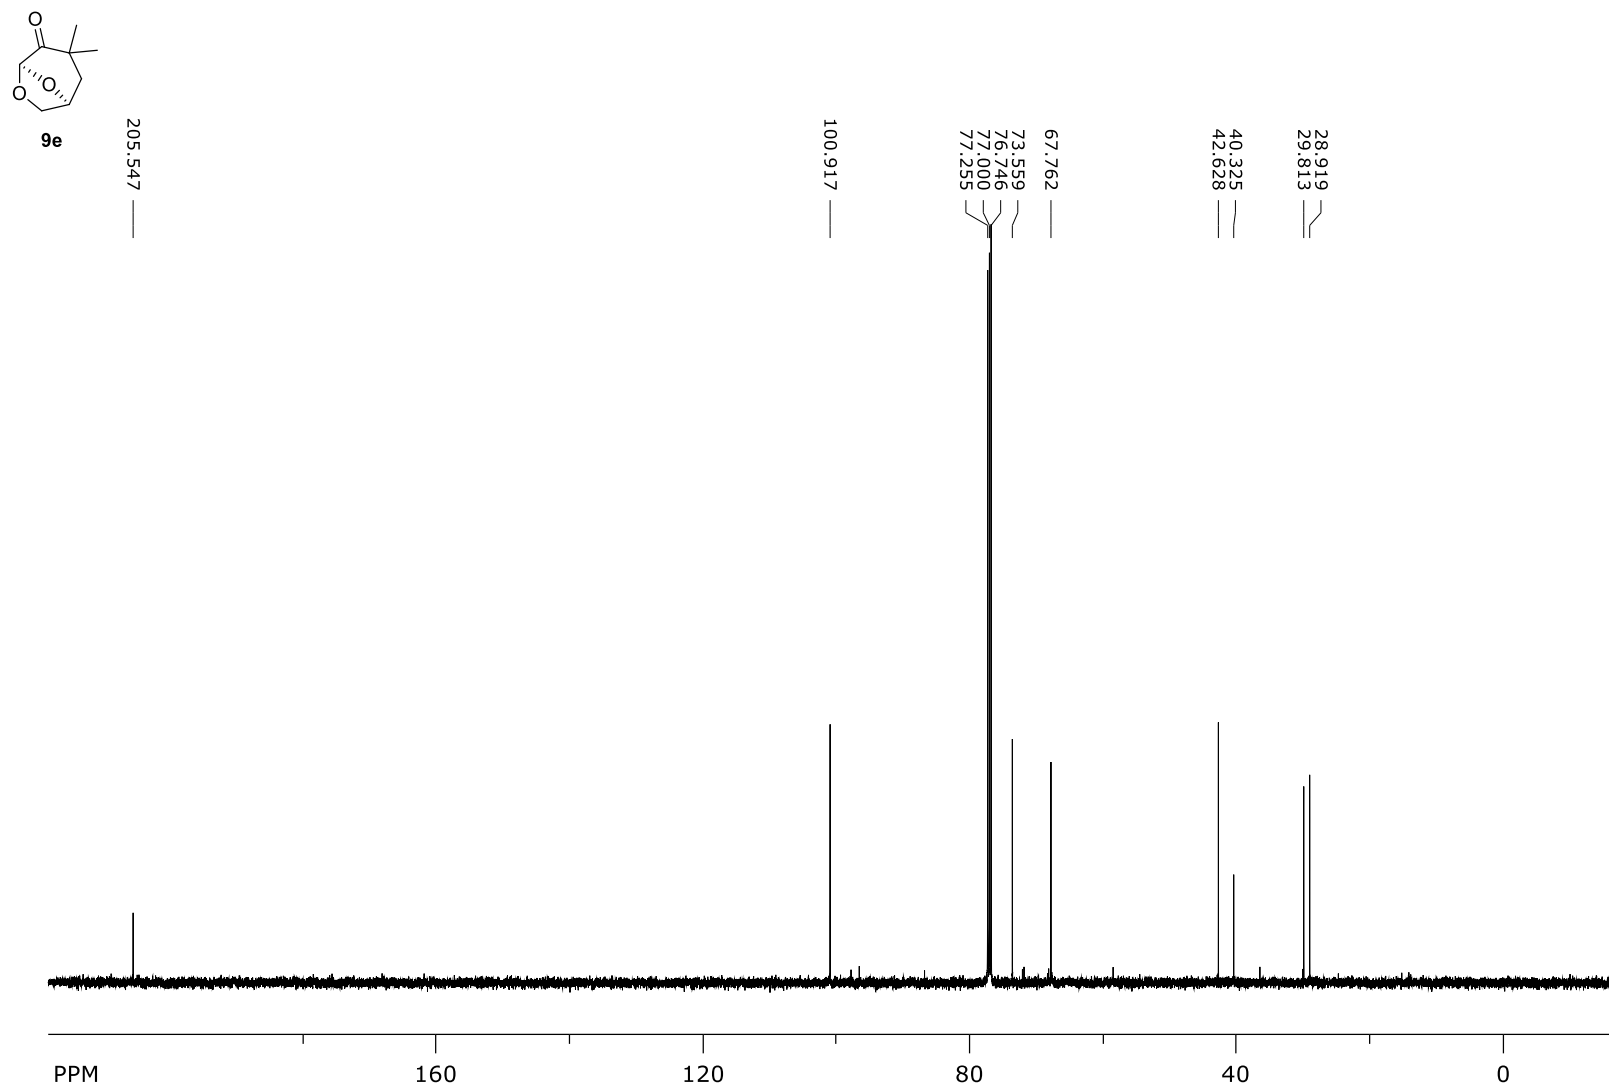



**<sup>1</sup>H NMR of (1*S*,5*R*)-3,3-Bis(4-methoxybenzyl)-6,8-dioxabicyclo[3.2.1]octan-4-one (9f)**

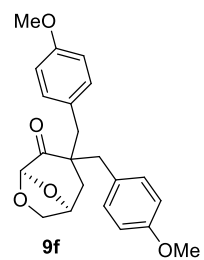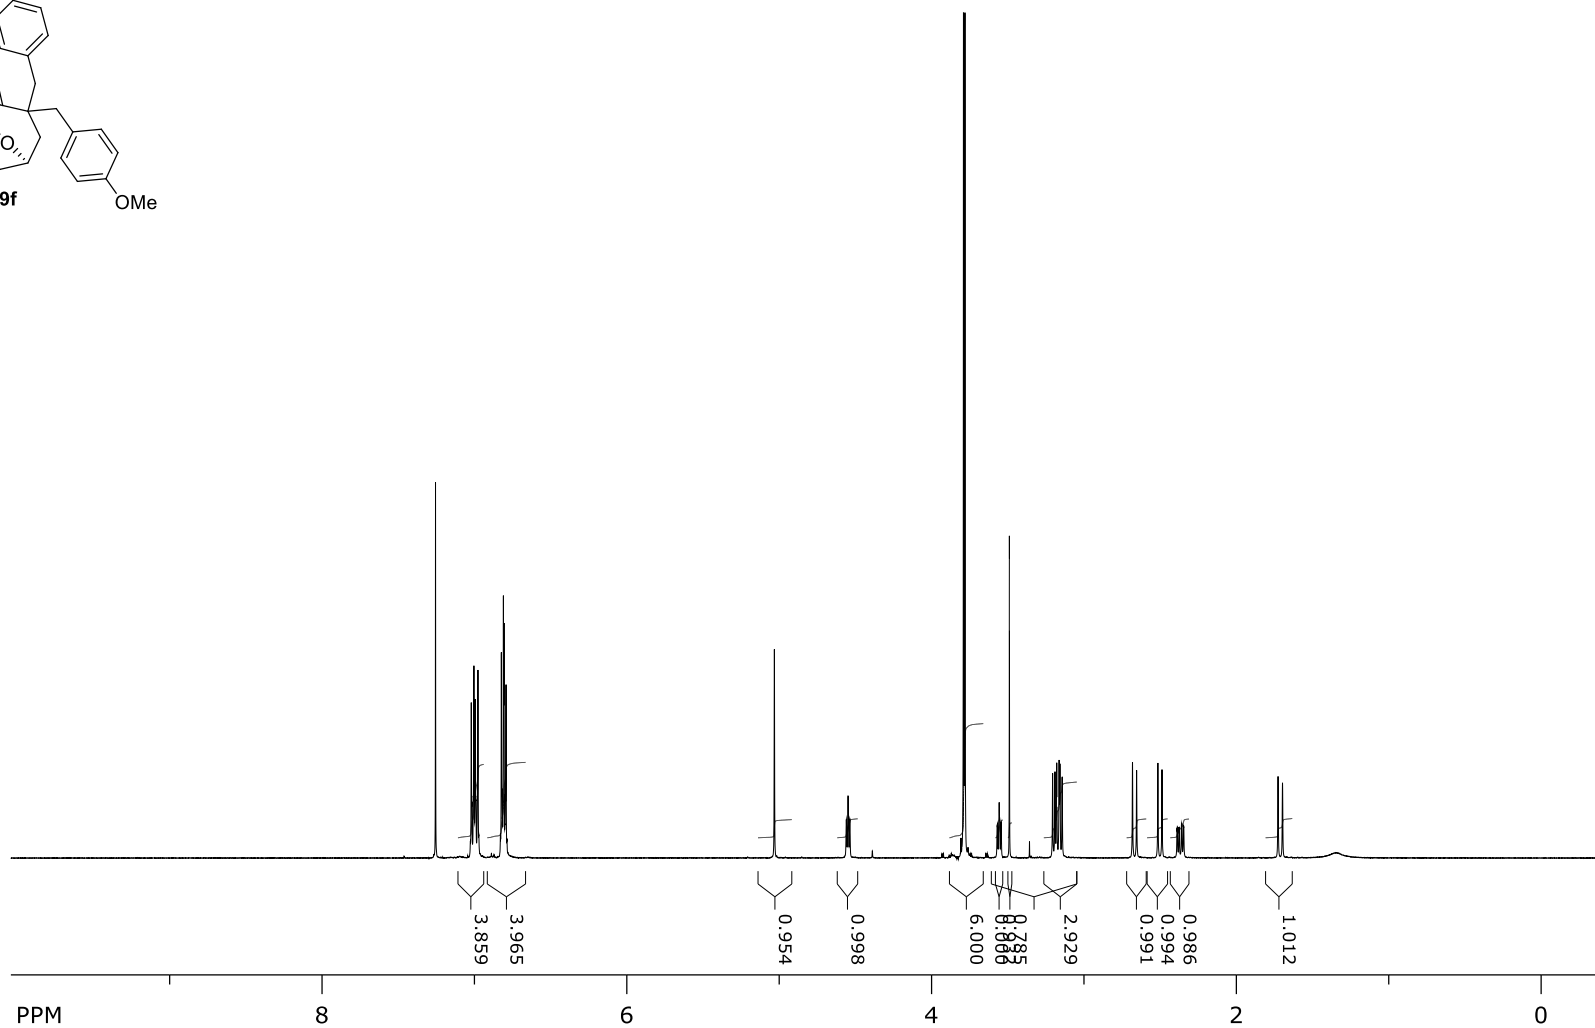

$^{13}\text{C}\{^1\text{H}\}$  NMR of (1*S*,5*R*)-3,3-Bis(4-methoxybenzyl)-6,8-dioxabicyclo[3.2.1]octan-4-one (9f)

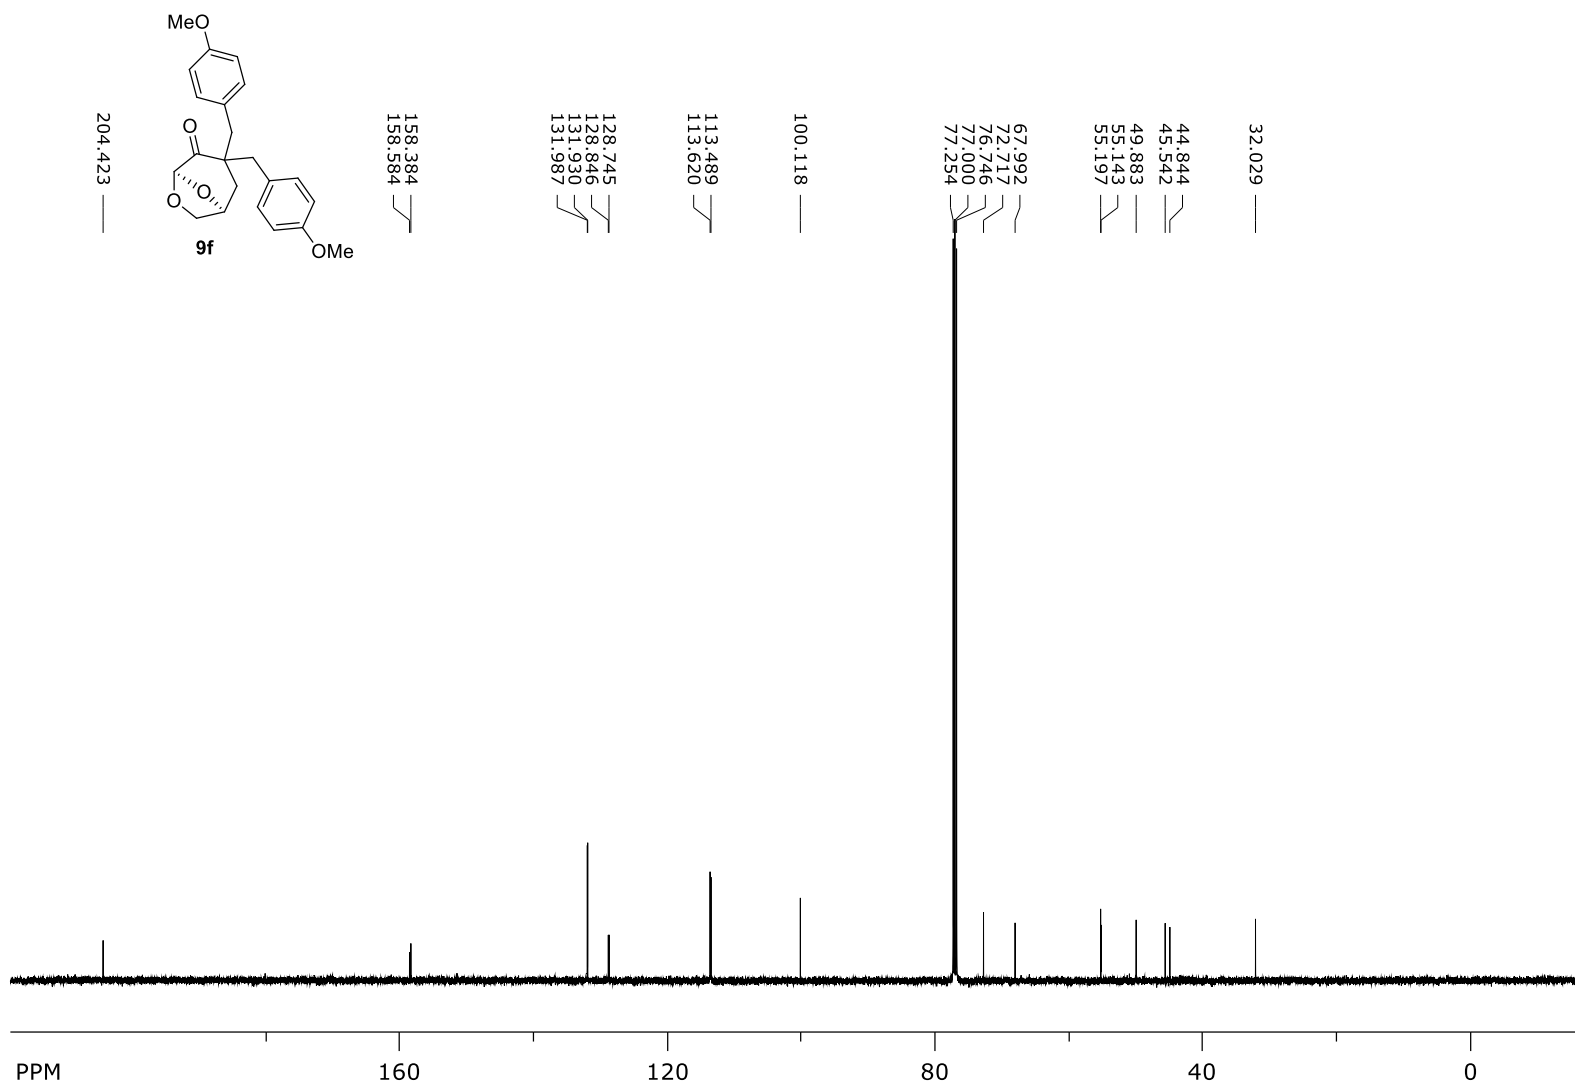

**<sup>1</sup>H NMR of (1*S*,4*S*,5*R*)-1',3'-Dihydro-6,8-dioxaspiro[bicyclo[3.2.1]octane-3,2'-inden]-4-ol (10d)**

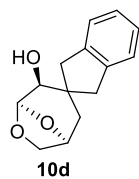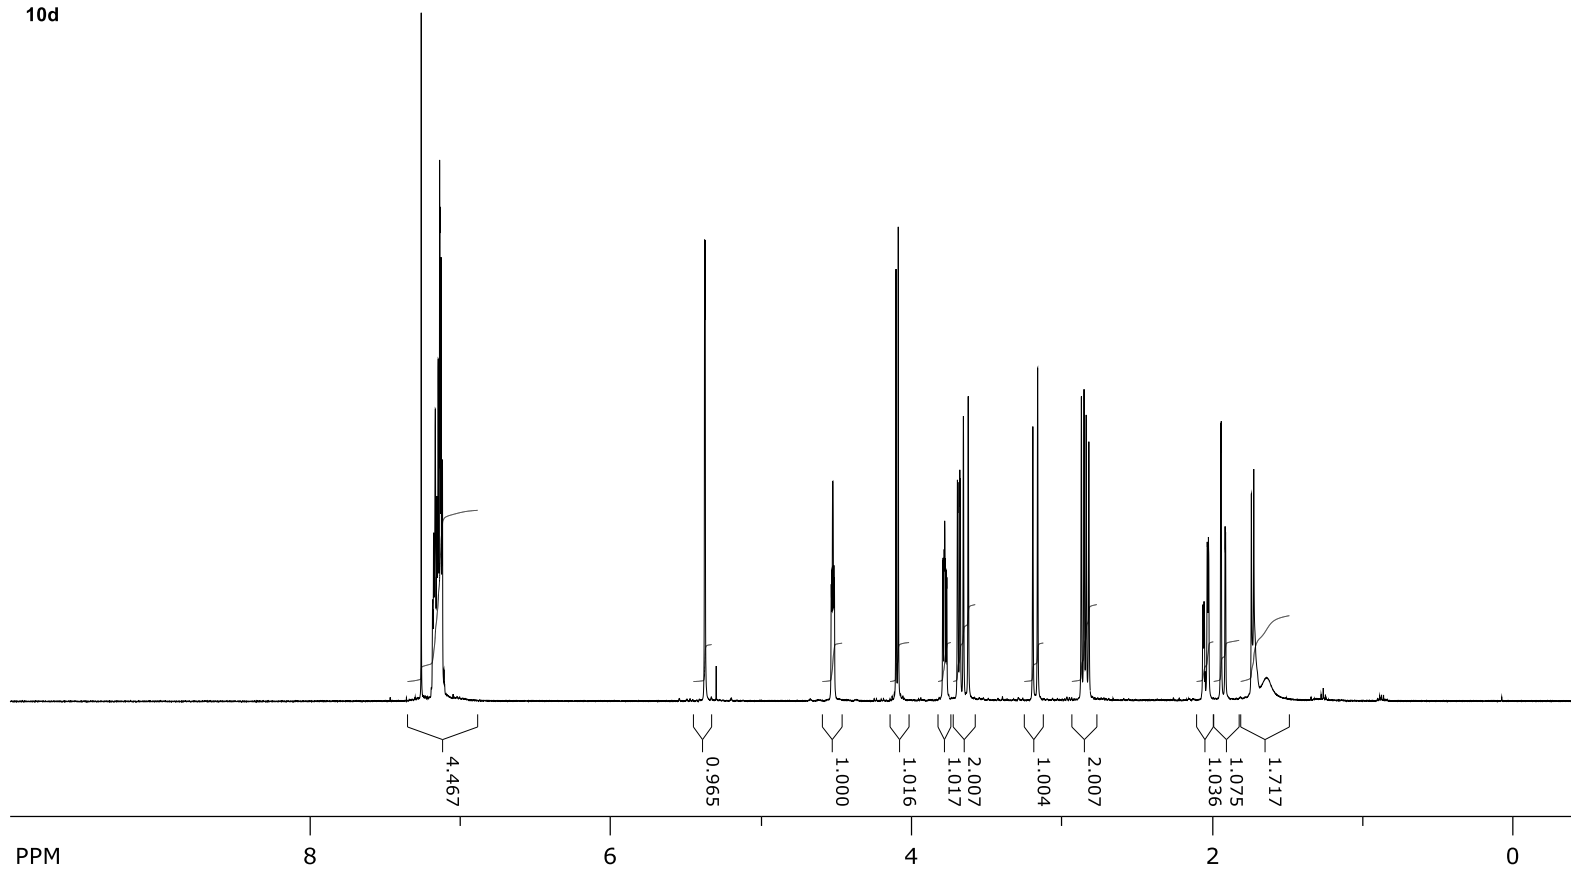

**$^{13}\text{C}\{^1\text{H}\}$  NMR of (1*S*,4*S*,5*R*)-1',3'-Dihydro-6,8-dioxaspiro[bicyclo[3.2.1]octane-3,2'-inden]-4-ol (10d)**

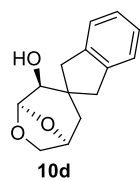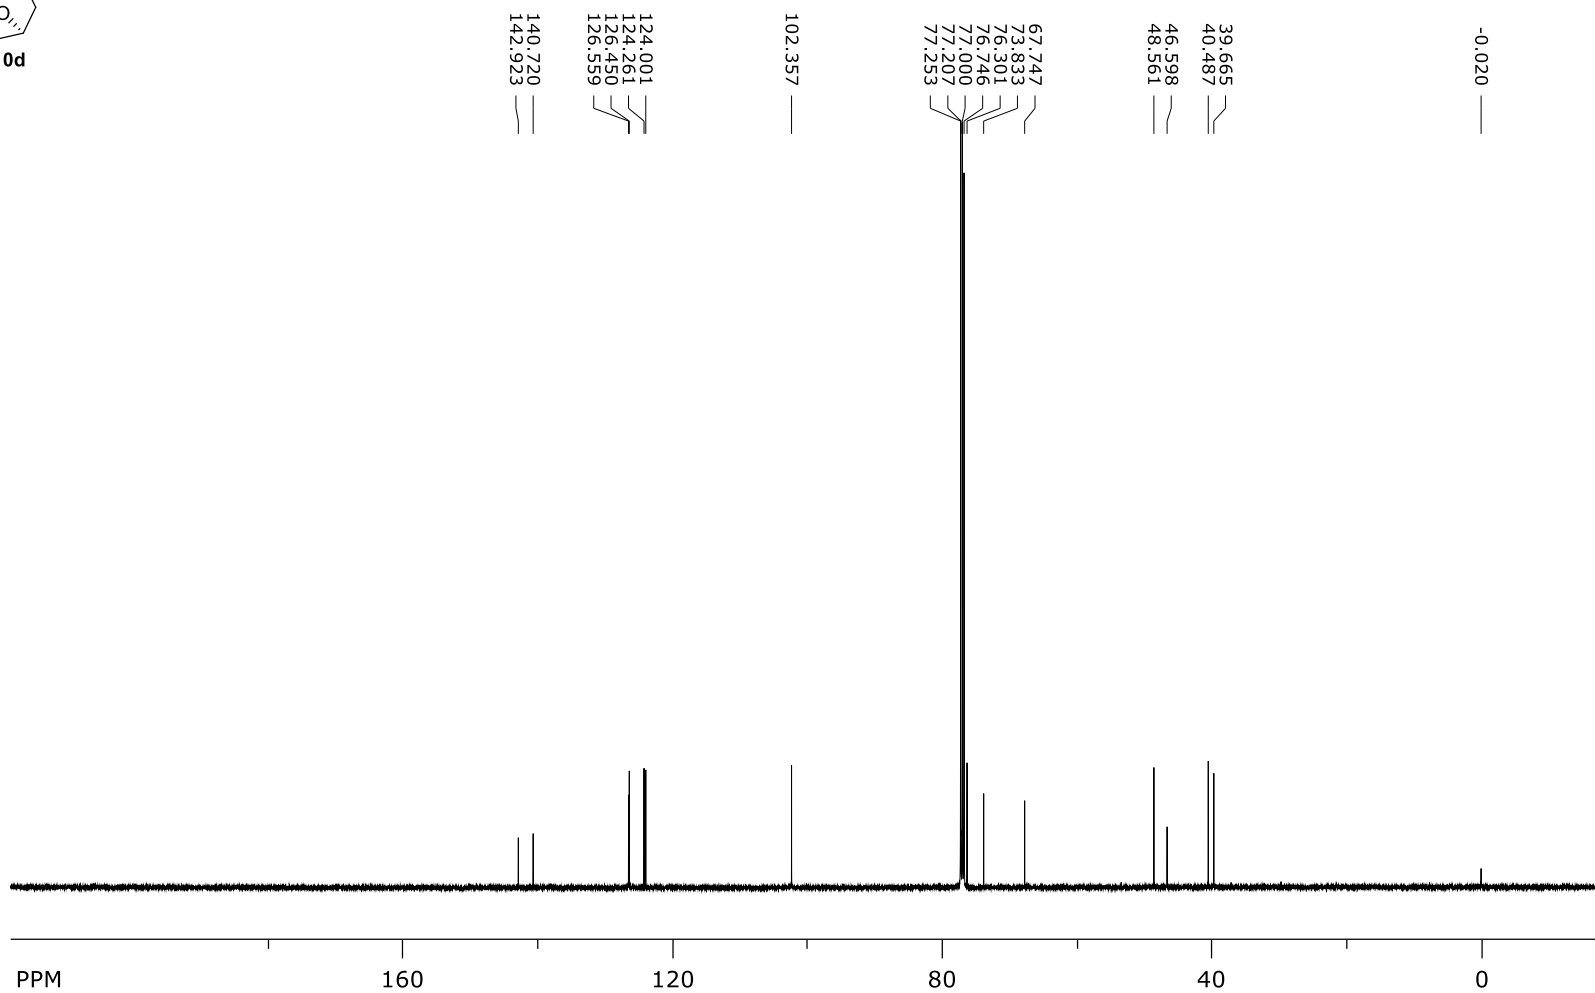

**$^1\text{H}$  NMR of (1*S*,4*S*,5*R*)-3,3-Dimethyl-6,8-dioxabicyclo[3.2.1]octan-4-ol (10e)**

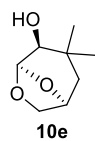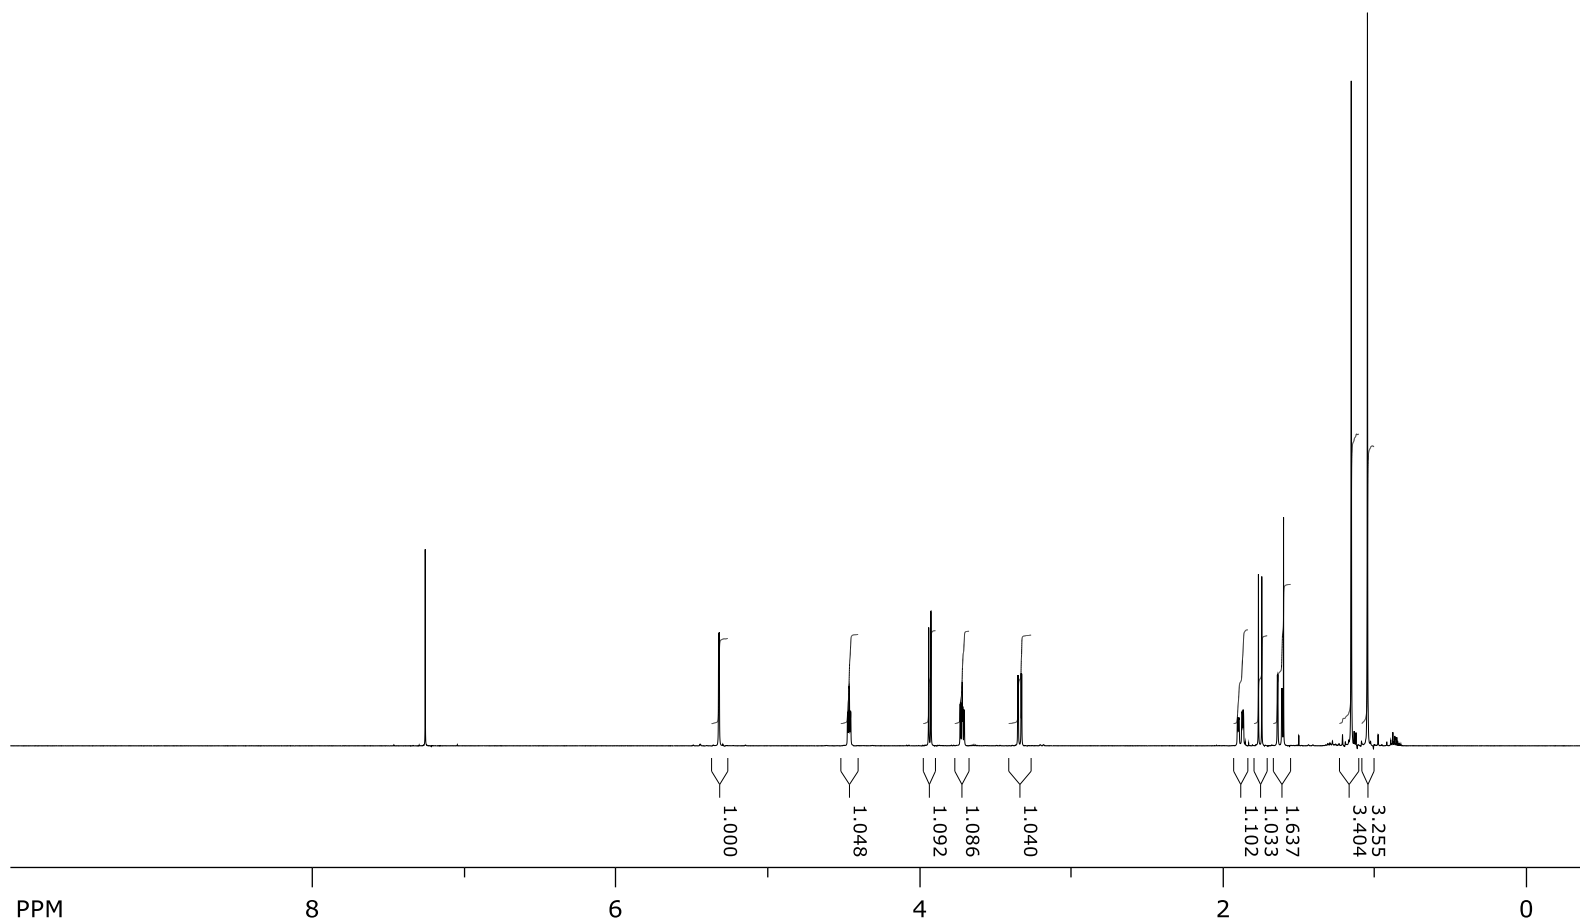

$^{13}\text{C}\{^1\text{H}\}$  NMR of (1*S*,4*S*,5*R*)-3,3-Dimethyl-6,8-dioxabicyclo[3.2.1]octan-4-ol (10e).

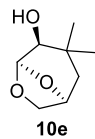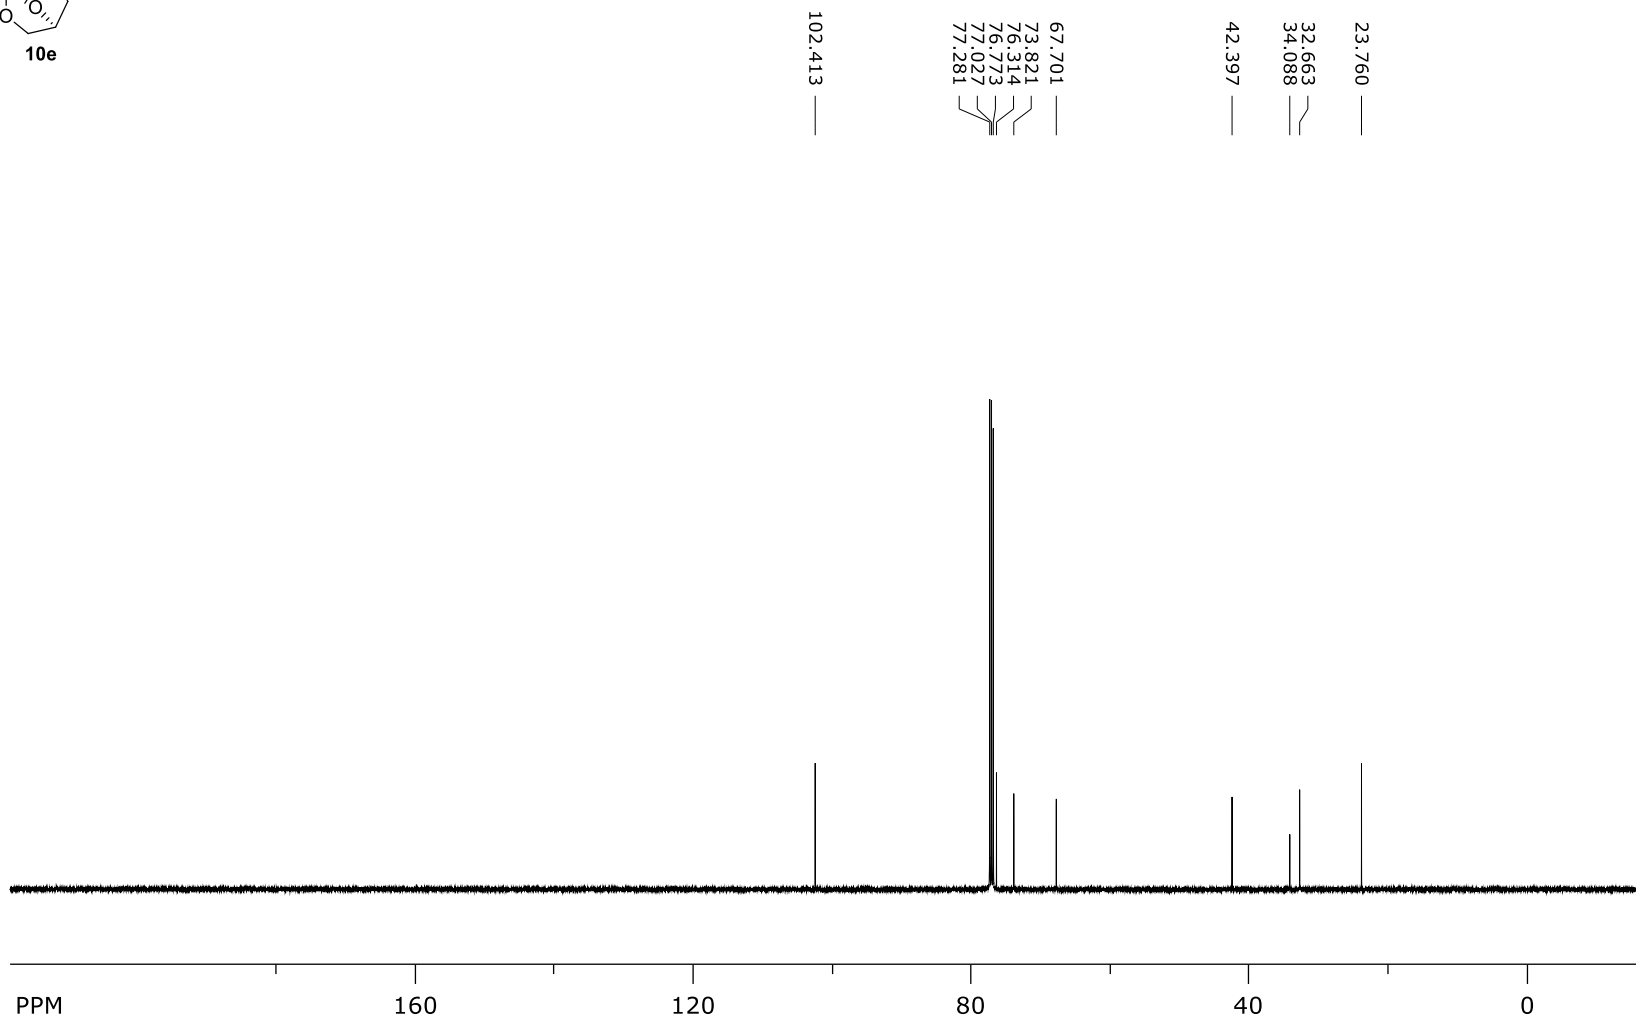

**<sup>1</sup>H NMR of (1*S*,4*S*,5*R*)-3,3-Bis(4-methoxybenzyl)-6,8-dioxabicyclo[3.2.1]octan-4-ol (10f)**

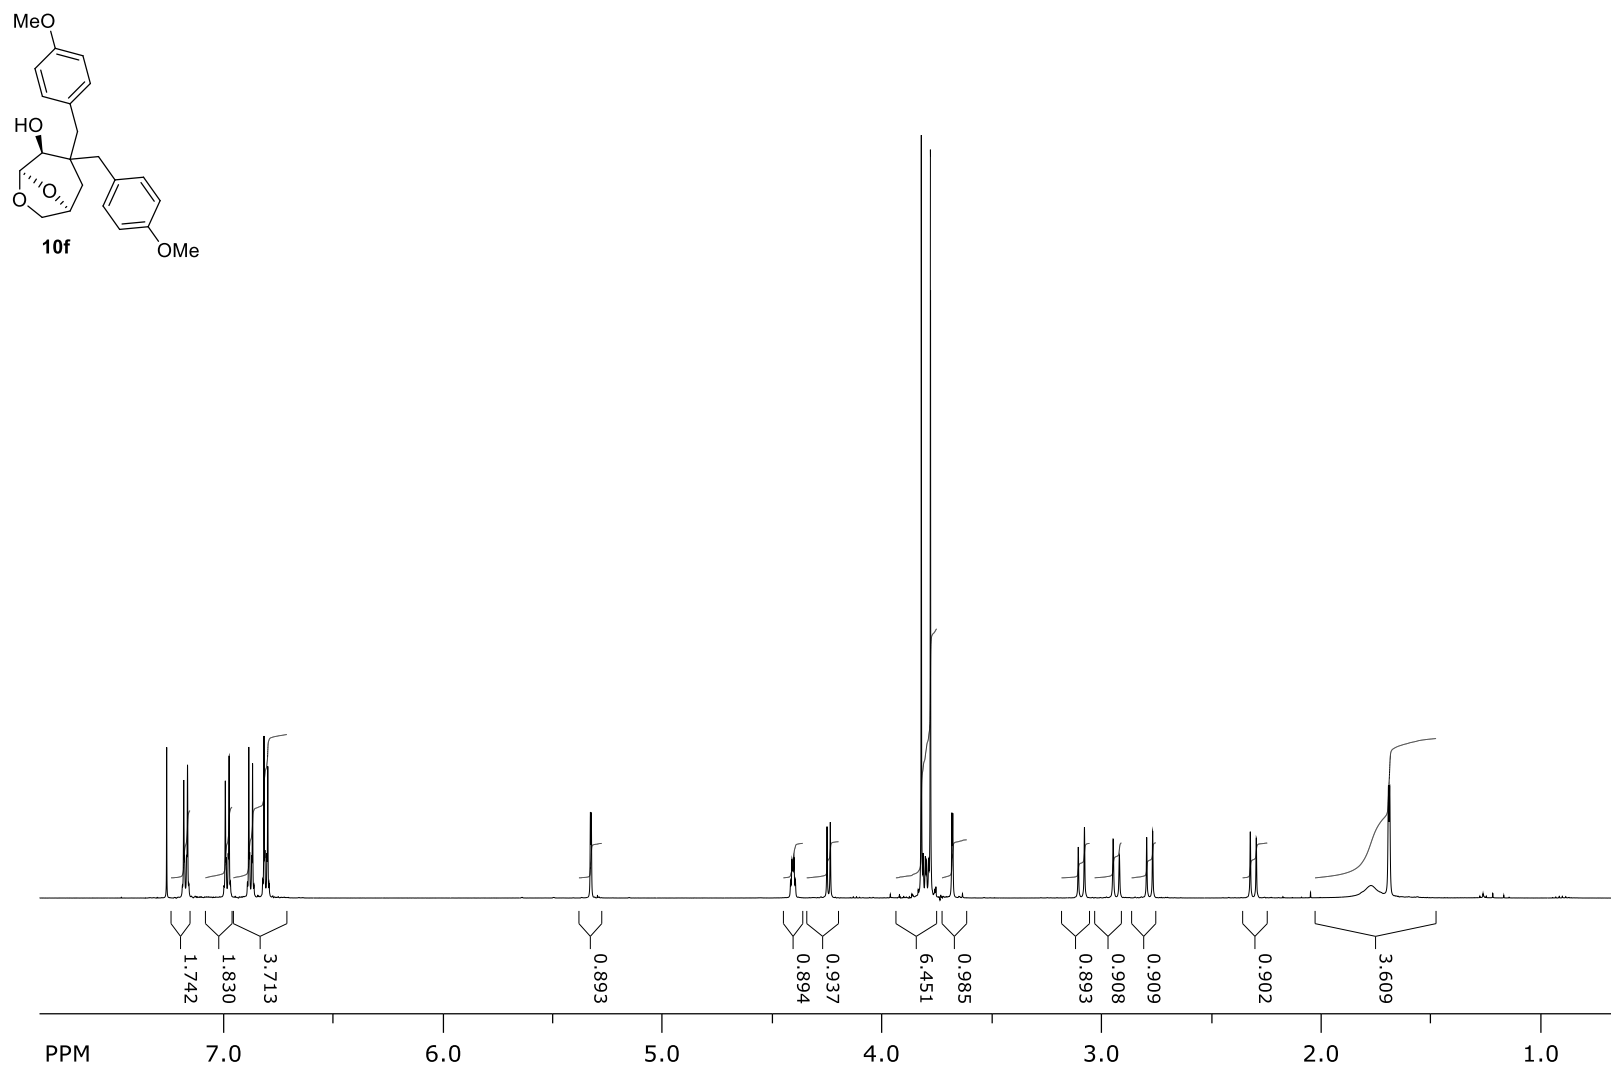

$^{13}\text{C}\{^1\text{H}\}$  NMR of (1*S*,4*S*,5*R*)-3,3-Bis(4-methoxybenzyl)-6,8-dioxabicyclo[3.2.1]octan-4-ol (10f)

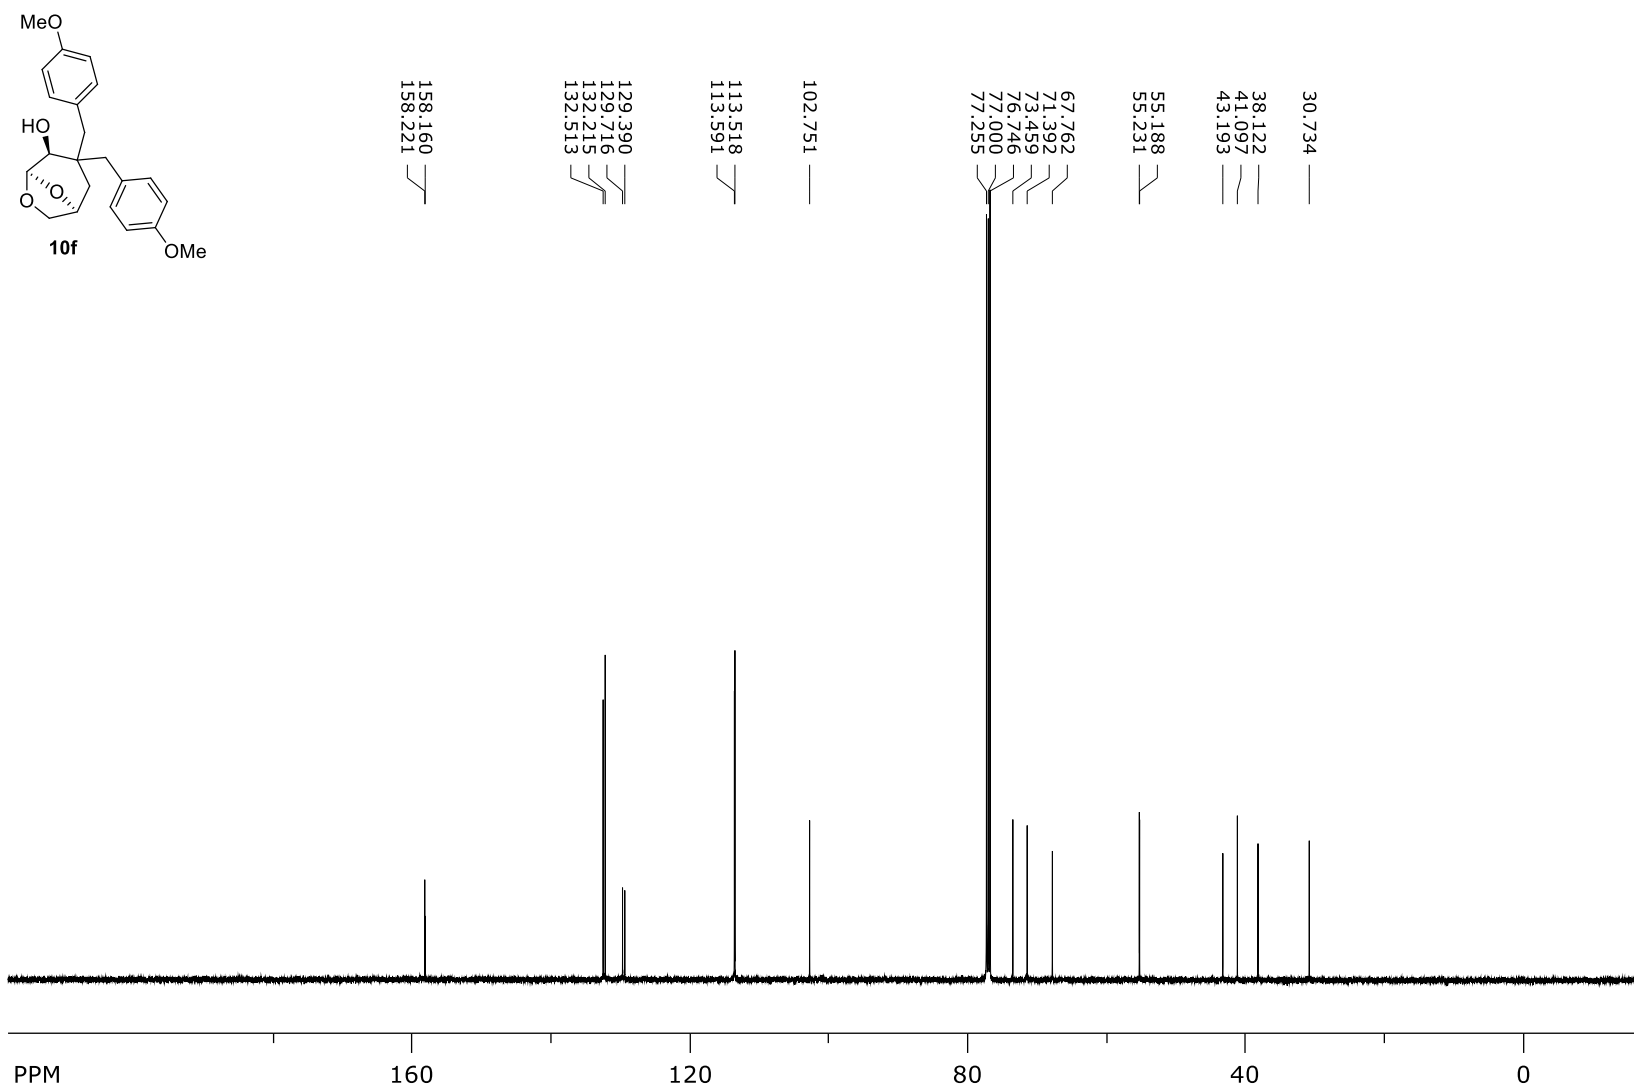



<sup>1</sup>H NMR of (1*R*,2*R*,5*S*)-7,7-dibenzyl-2-chloro-3,8-dioxabicyclo[3.2.1]octane (11a).

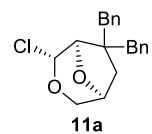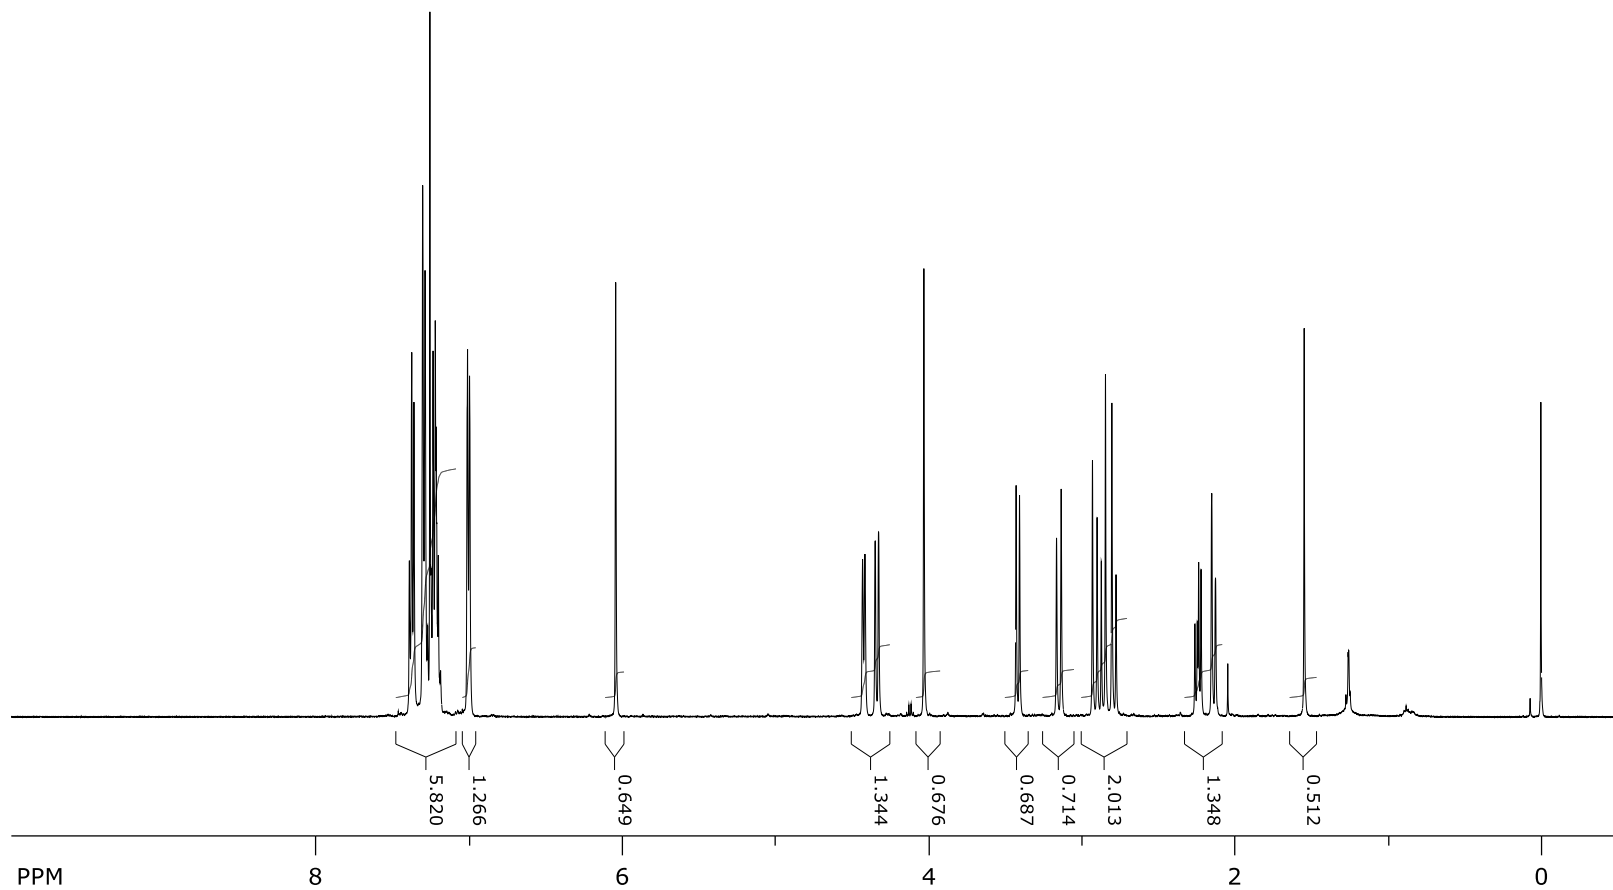

$^{13}\text{C}\{^1\text{H}\}$  NMR of (1*R*,2*R*,5*S*)-7,7-dibenzyl-2-chloro-3,8-dioxabicyclo[3.2.1]octane (11a).

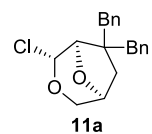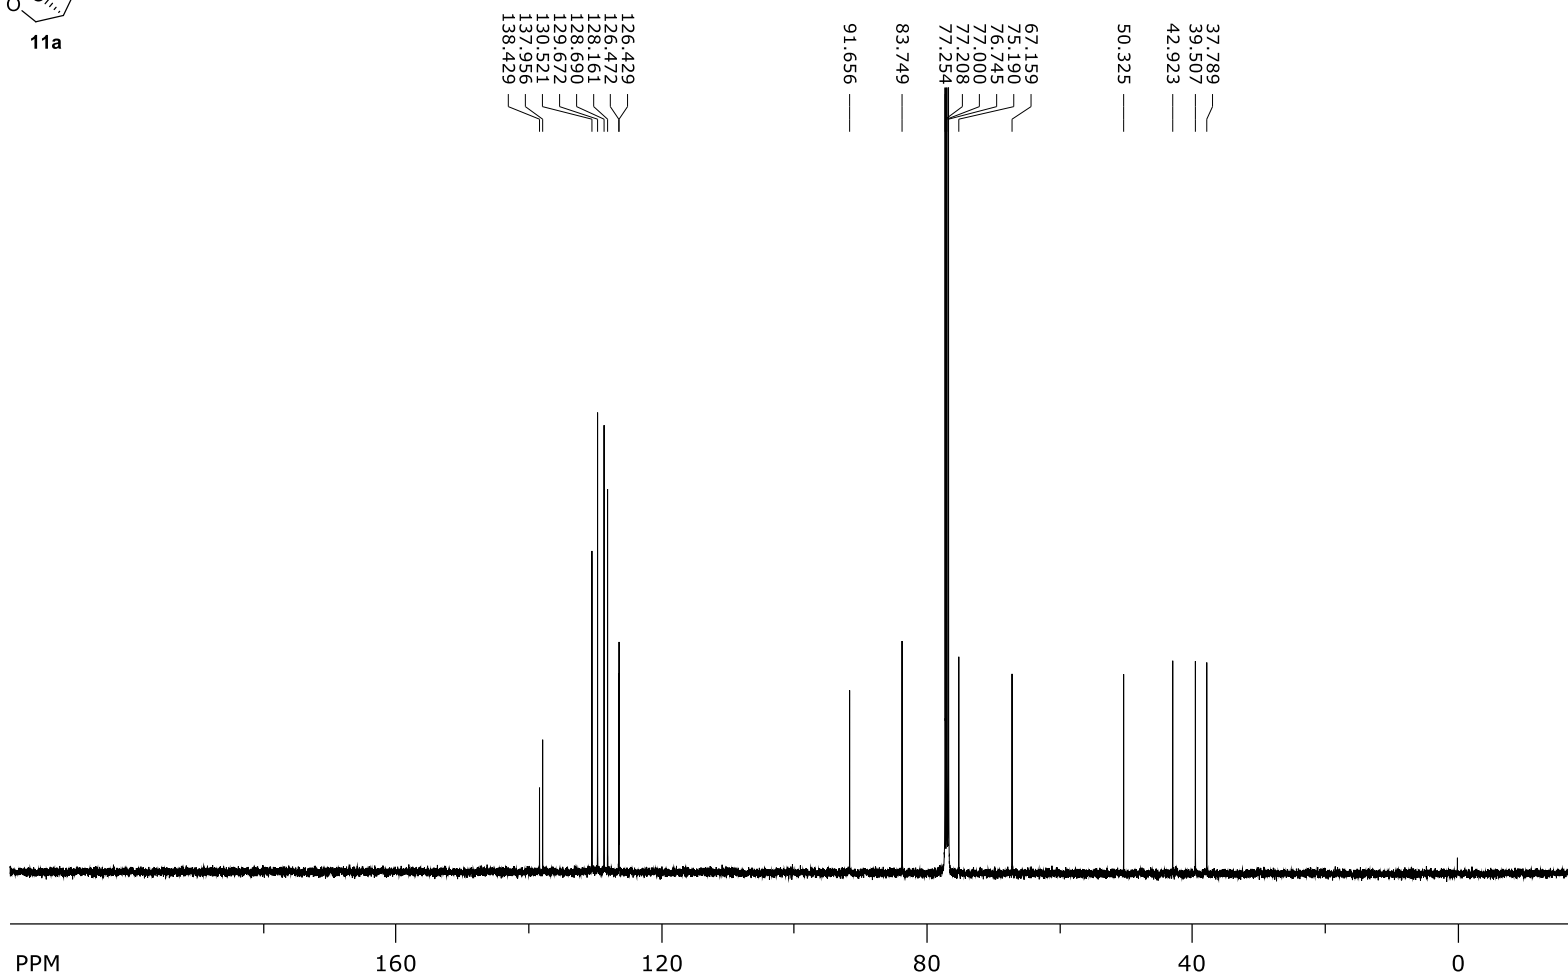

**$^1\text{H}$  NMR of (1*R*,2*R*,5*S*)-2-Chloro-3,8-dioxabicyclo[3.2.1]octane (11b) contaminated with 14**

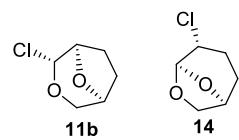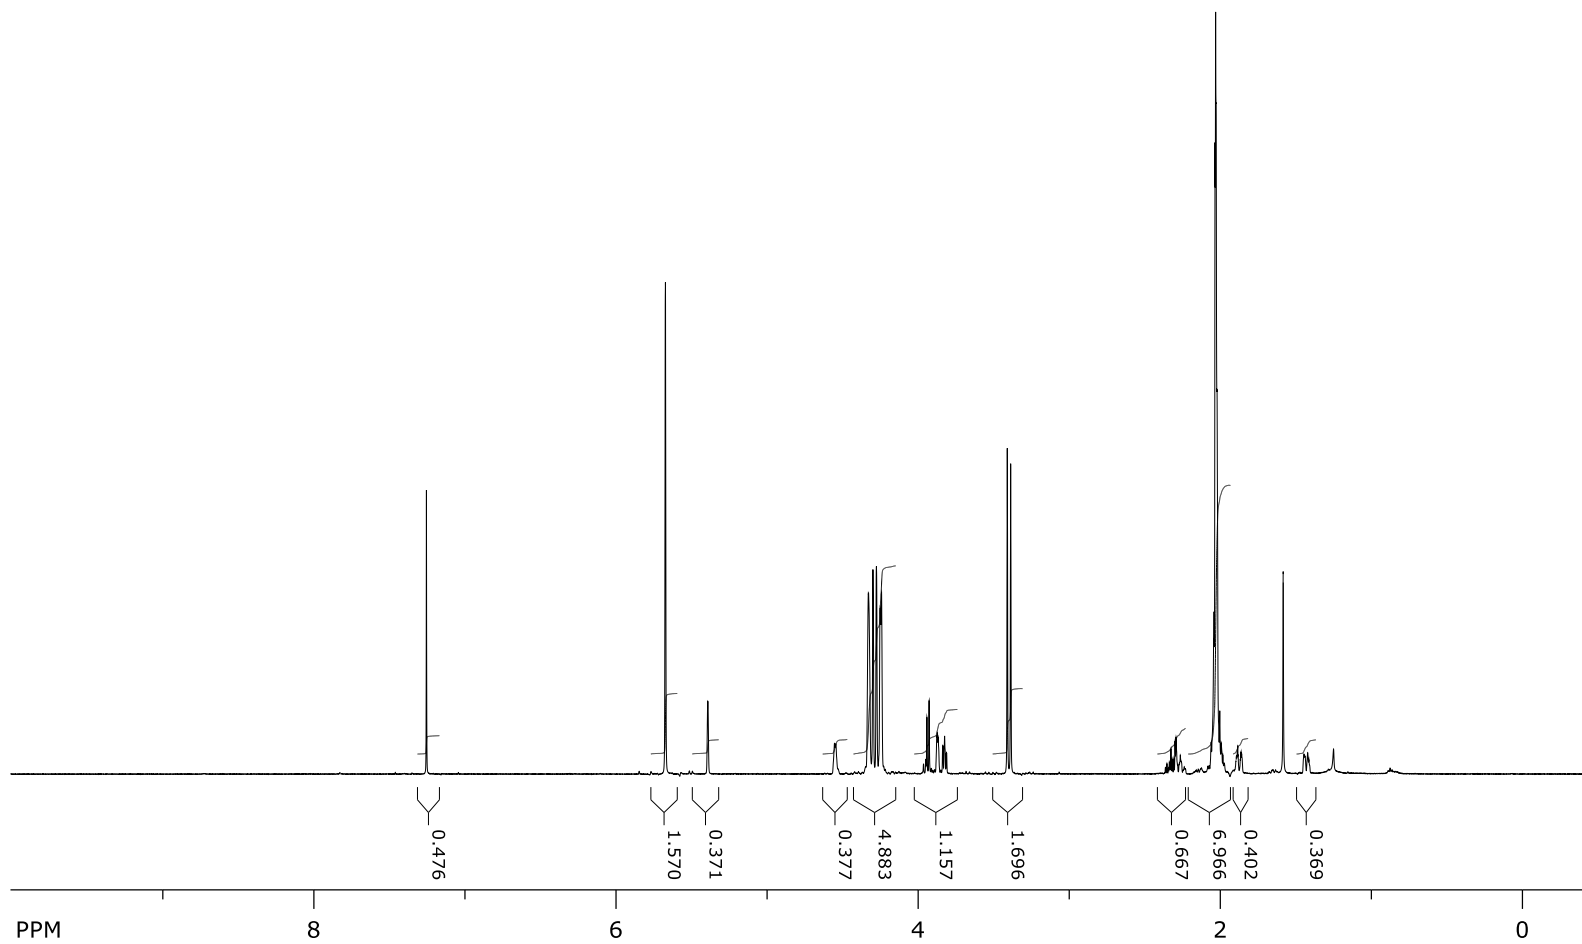

**$^{13}\text{C}\{^1\text{H}\}$  NMR of (1*R*,2*R*,5*S*)-2-Chloro-3,8-dioxabicyclo[3.2.1]octane (11b) contaminated with 14**

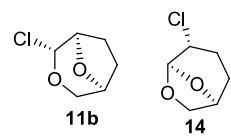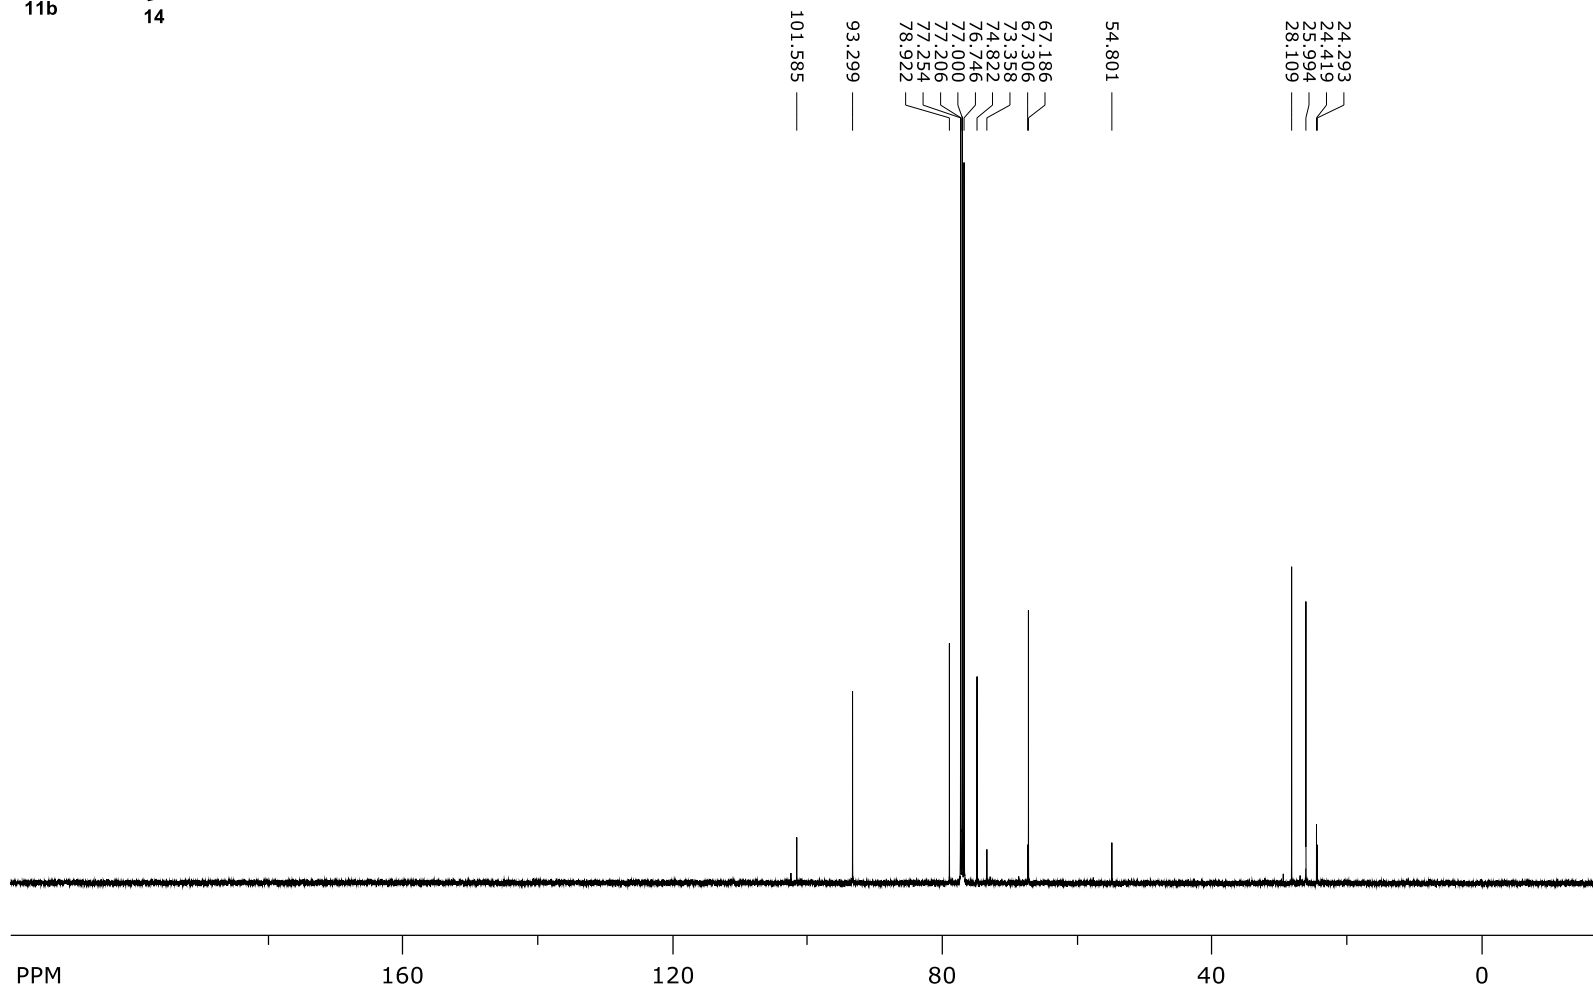

**<sup>1</sup>H NMR of (1*R*,2*R*,5*S*)-2-Chloro-7,7-bis(2-methylbenzyl)-3,8-dioxabicyclo[3.2.1]octane (11c)**

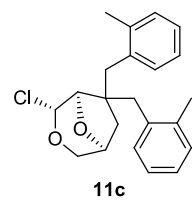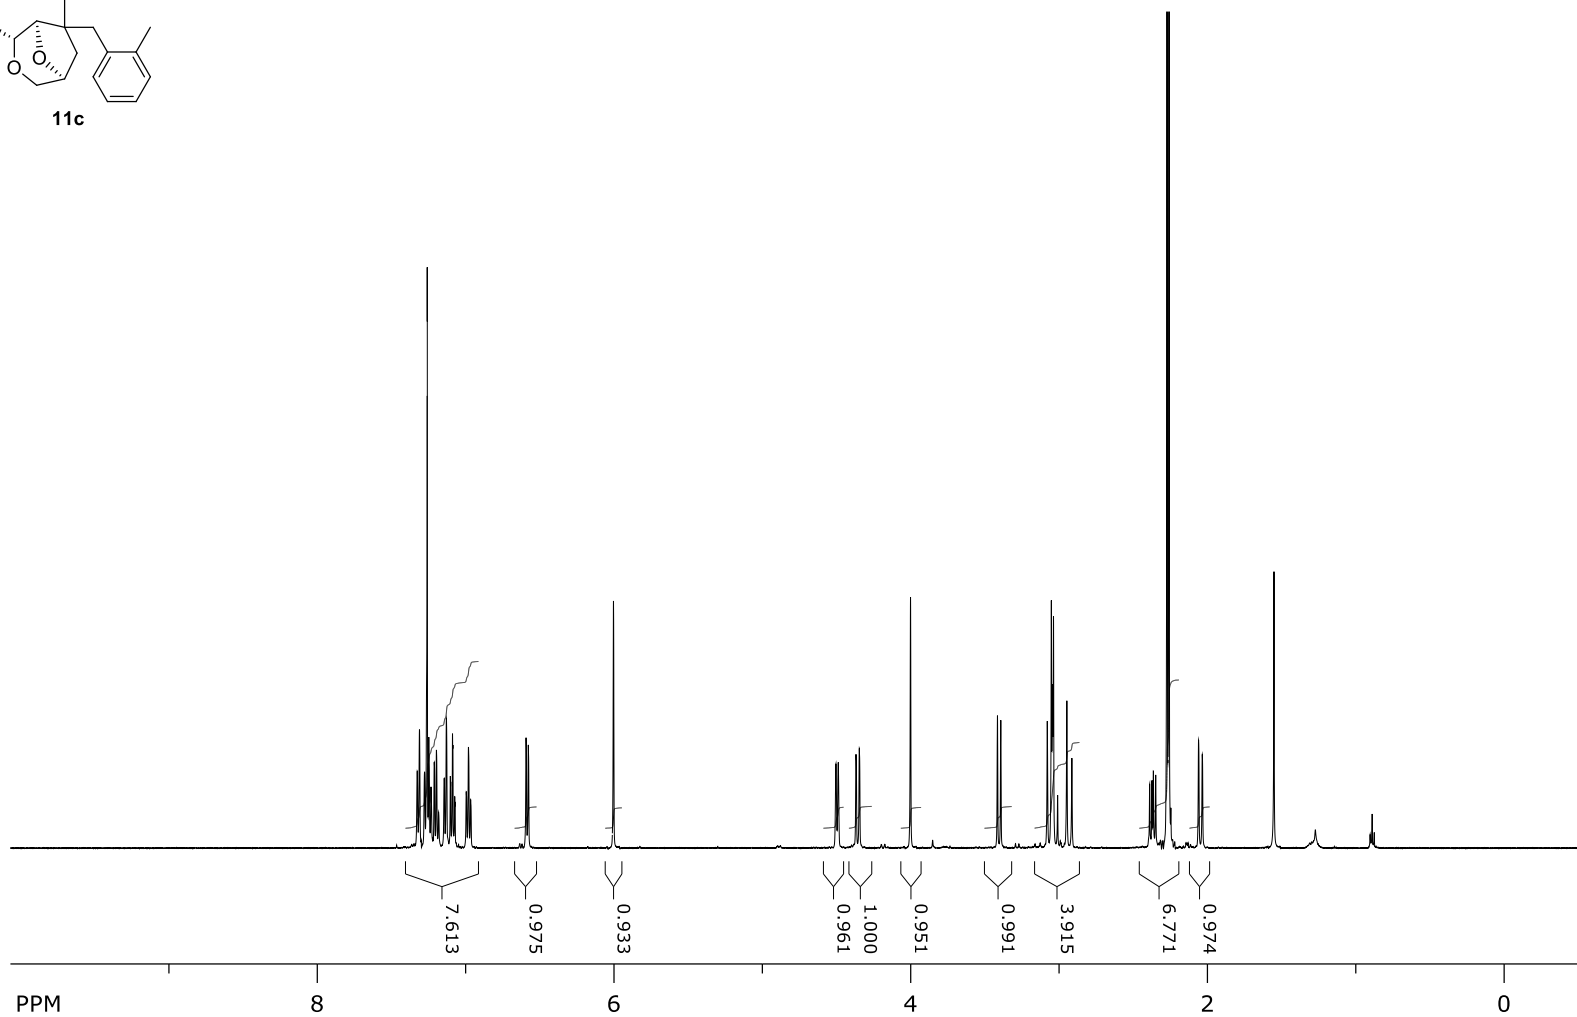

$^{13}\text{C}\{^1\text{H}\}$  NMR of (1*R*,2*R*,5*S*)-2-Chloro-7,7-bis(2-methylbenzyl)-3,8-dioxabicyclo[3.2.1]octane (**11c**)

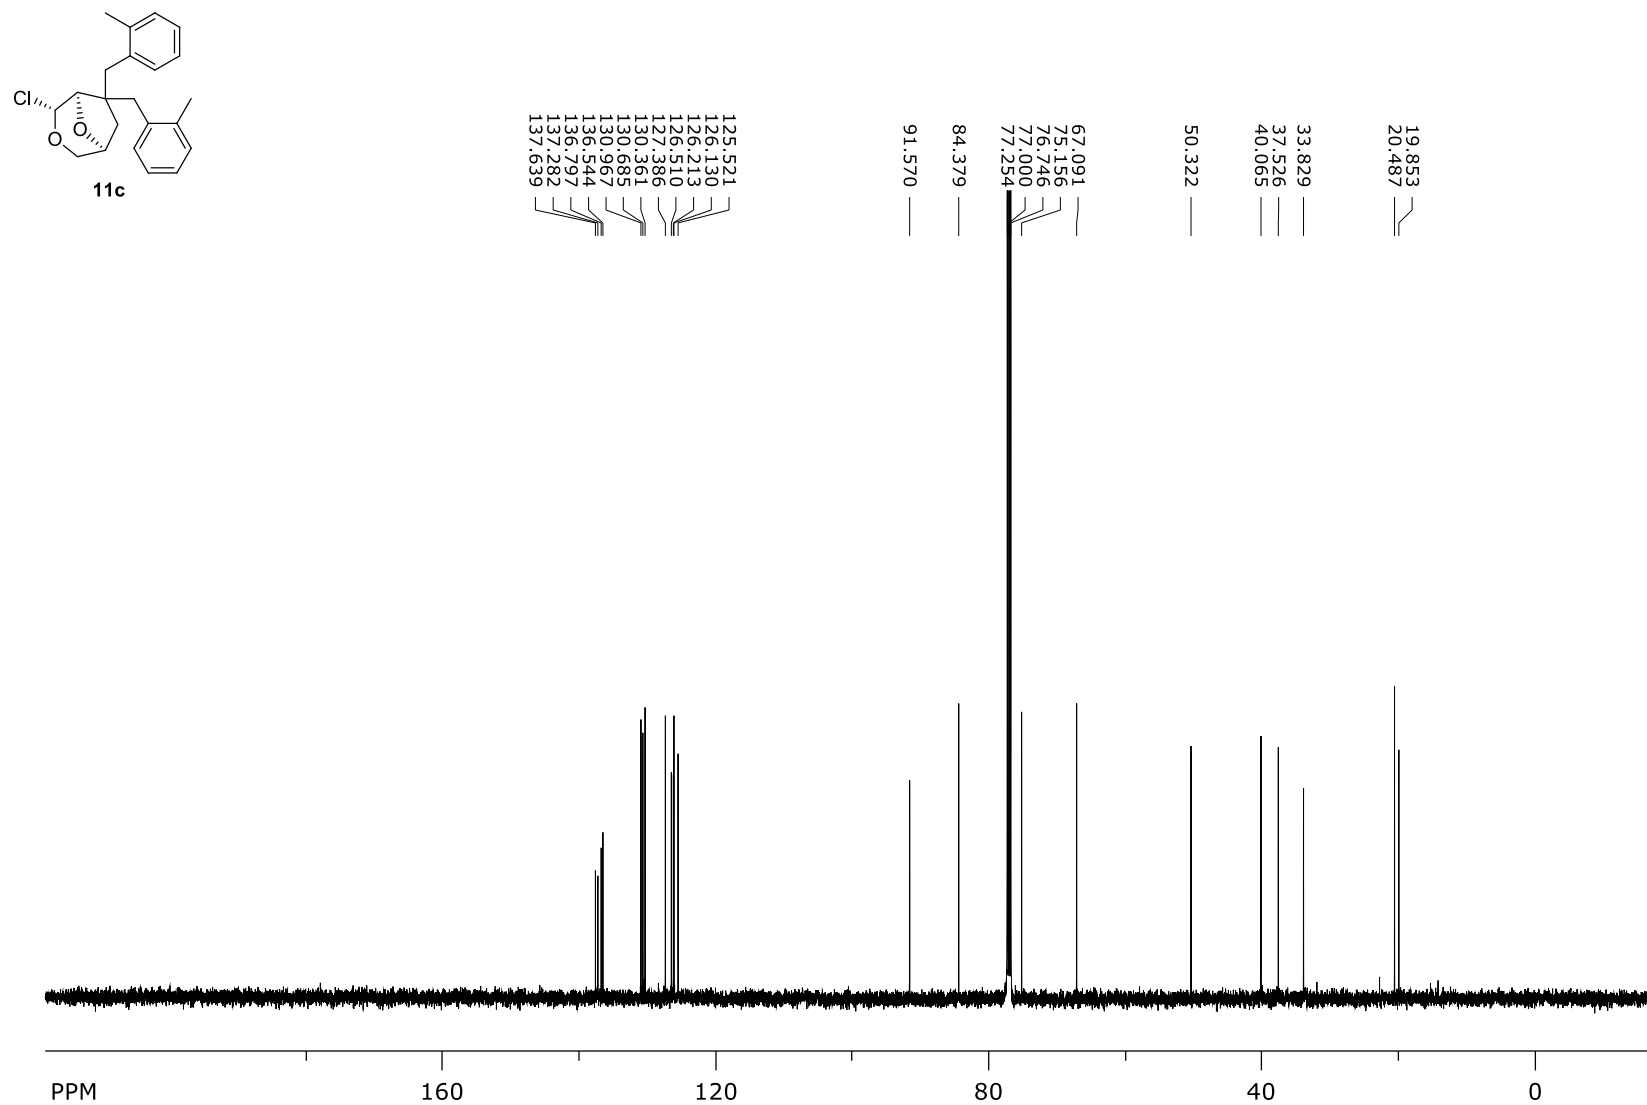

**<sup>1</sup>H NMR of (1*S*,4*R*,5*R*)-4-Chloro-1',3'-dihydro-3,8-dioxaspiro[bicyclo[3.2.1]octane-6,2'-indene] (11d)**

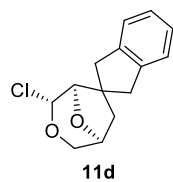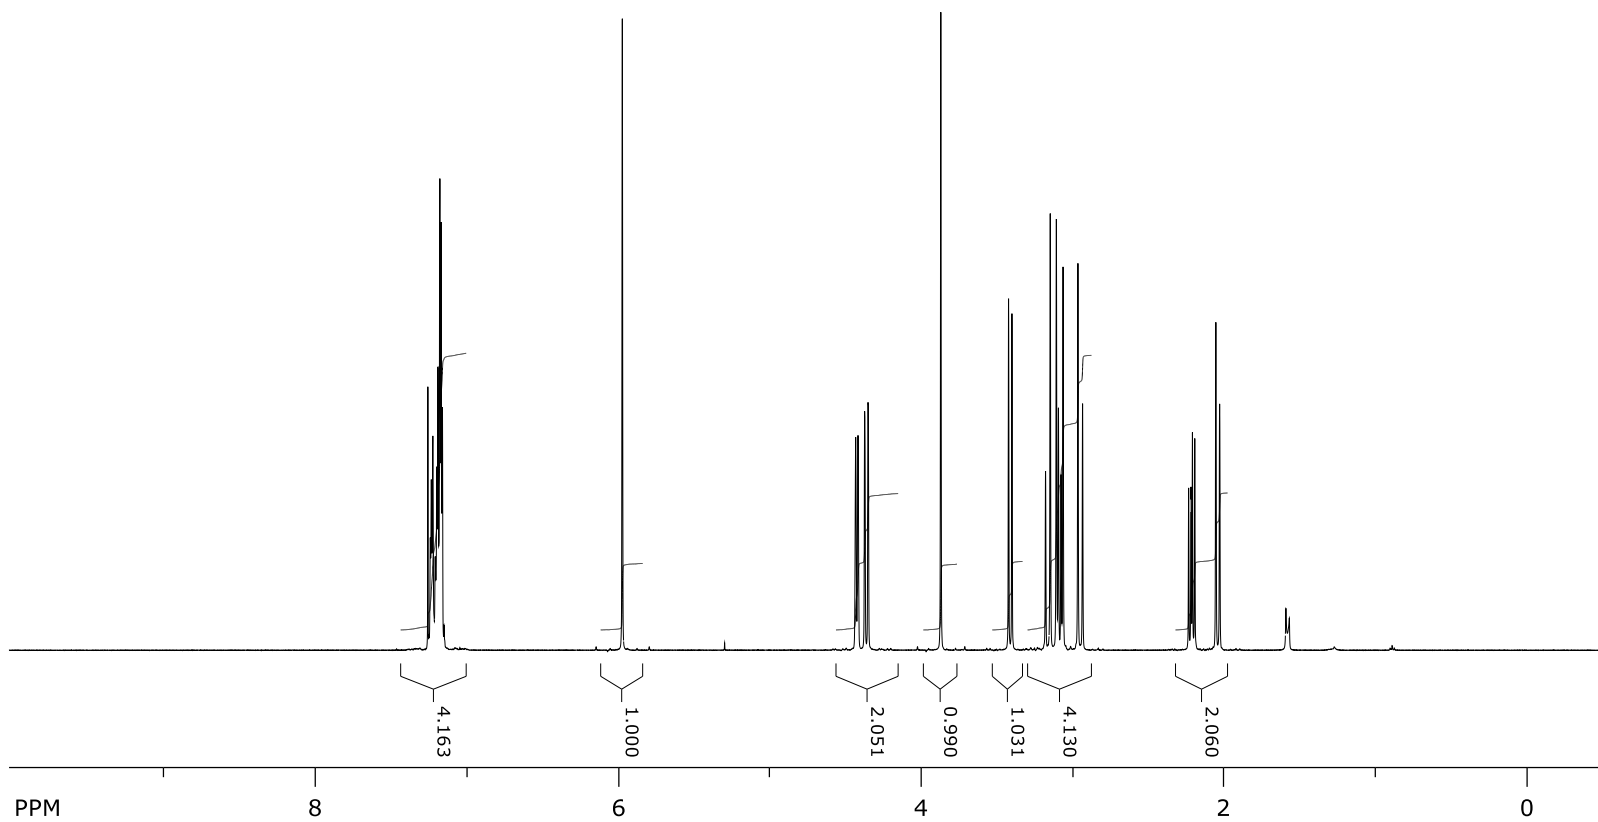

$^{13}\text{C}\{^1\text{H}\}$  NMR of (1*S*,4*R*,5*R*)-4-Chloro-1',3'-dihydro-3,8-dioxaspiro[bicyclo[3.2.1]octane-6,2'-indene] (11d)

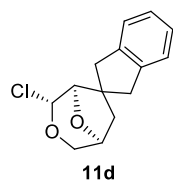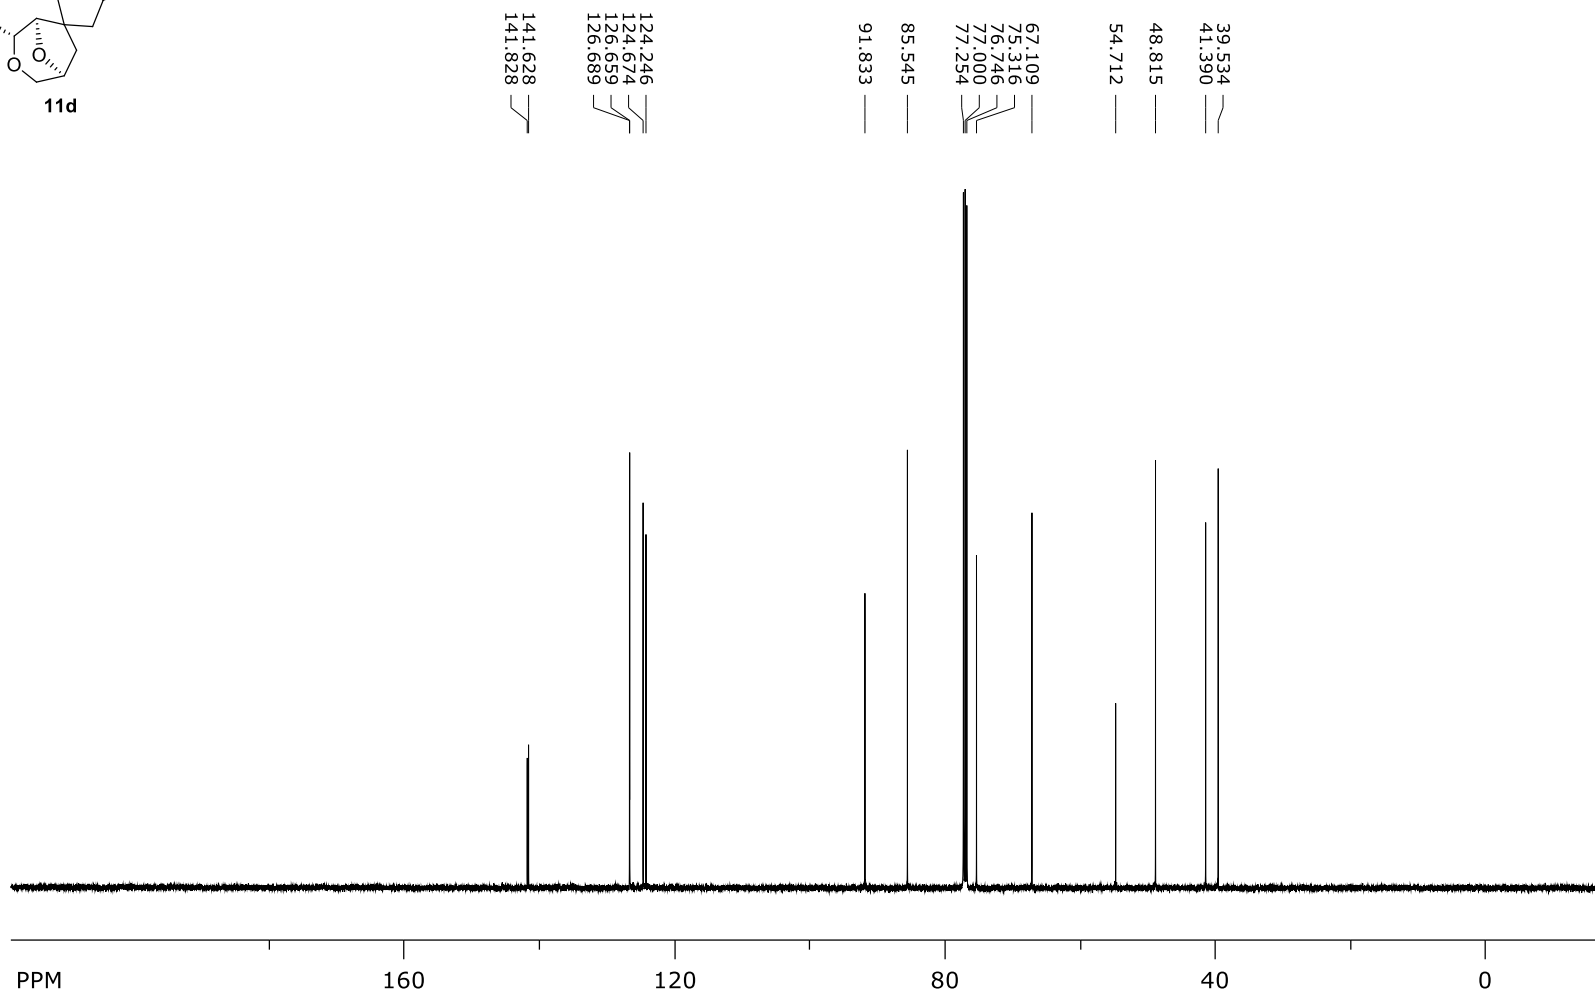



**<sup>1</sup>H NMR of (1R,2R,5S)-2-Chloro-7,7-dimethyl-3,8-dioxabicyclo[3.2.1]octane (11e)**

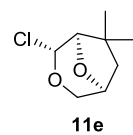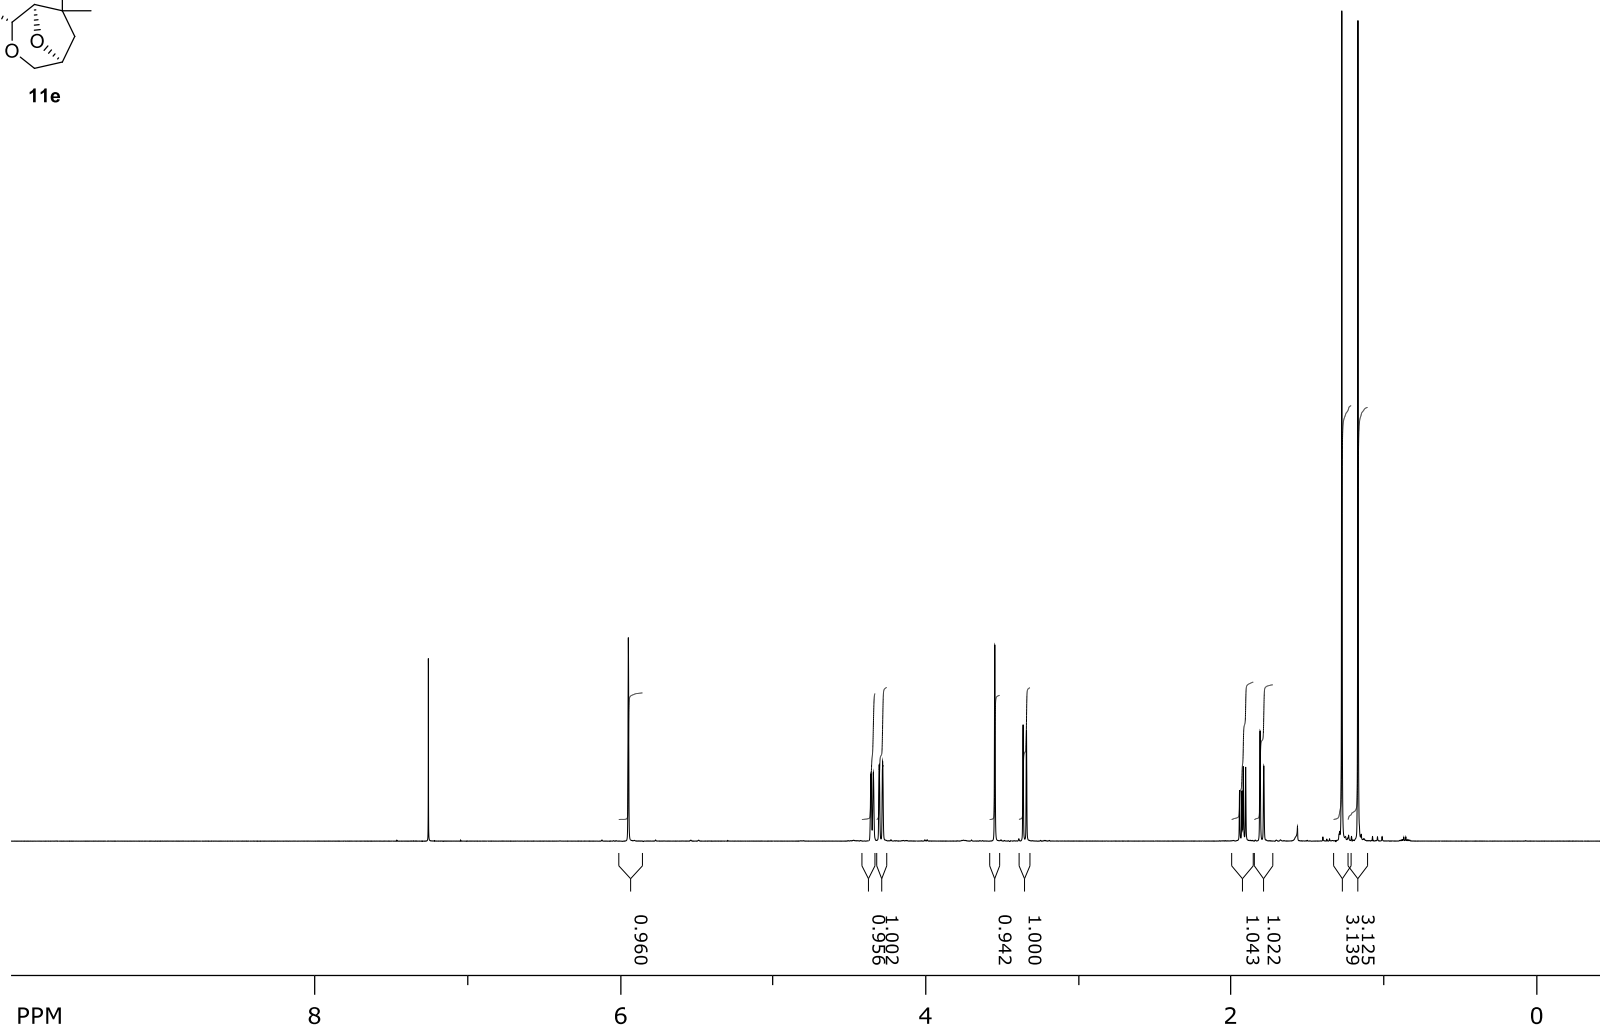

$^{13}\text{C}\{^1\text{H}\}$  NMR of (1R,2R,5S)-2-Chloro-7,7-dimethyl-3,8-dioxabicyclo[3.2.1]octane (11e)

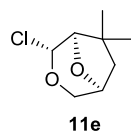

|        |   |
|--------|---|
| 22.377 | — |
| 31.159 | — |
| 41.720 | — |
| 42.079 | — |
| 67.060 | — |
| 75.731 | — |
| 76.766 | — |
| 77.020 | — |
| 77.274 | — |
| 86.928 | — |
| 91.943 | — |

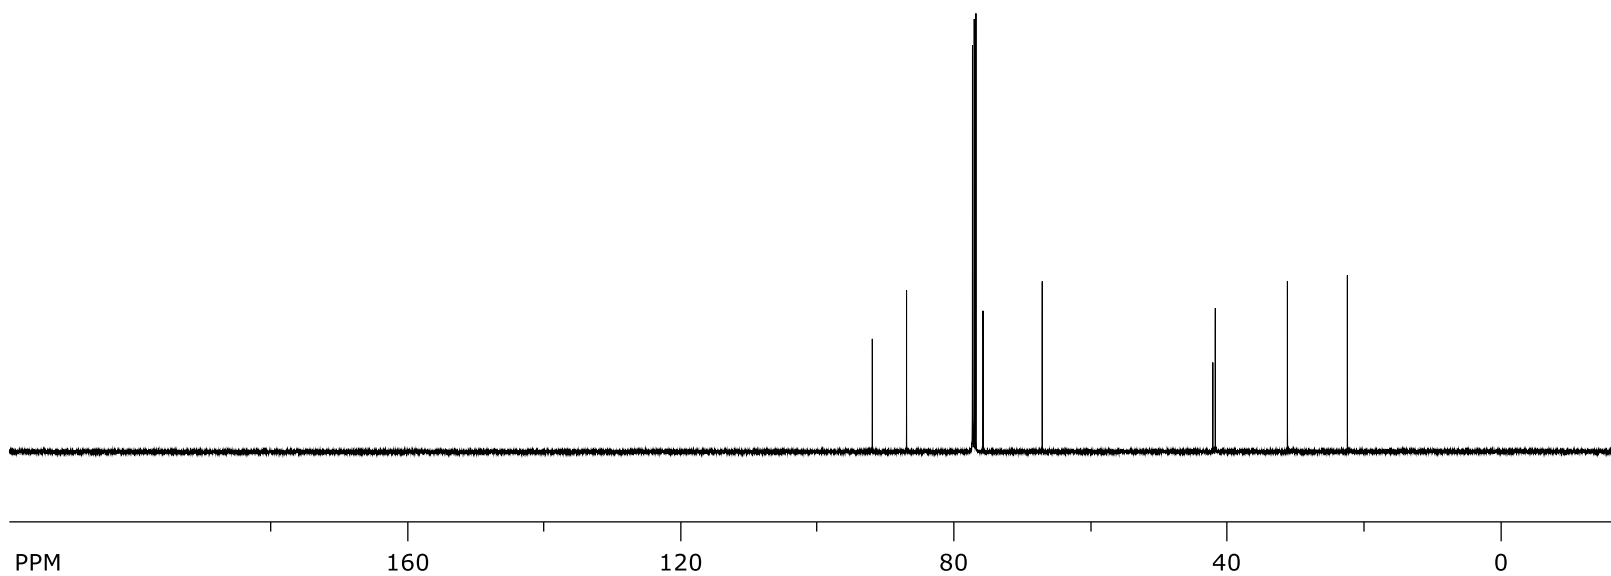

**<sup>1</sup>H NMR of (1*R*,2*R*,5*S*)-2-Chloro-7,7-bis(4-methoxybenzyl)-3,8-dioxabicyclo[3.2.1]octane (11f)**

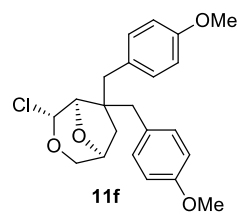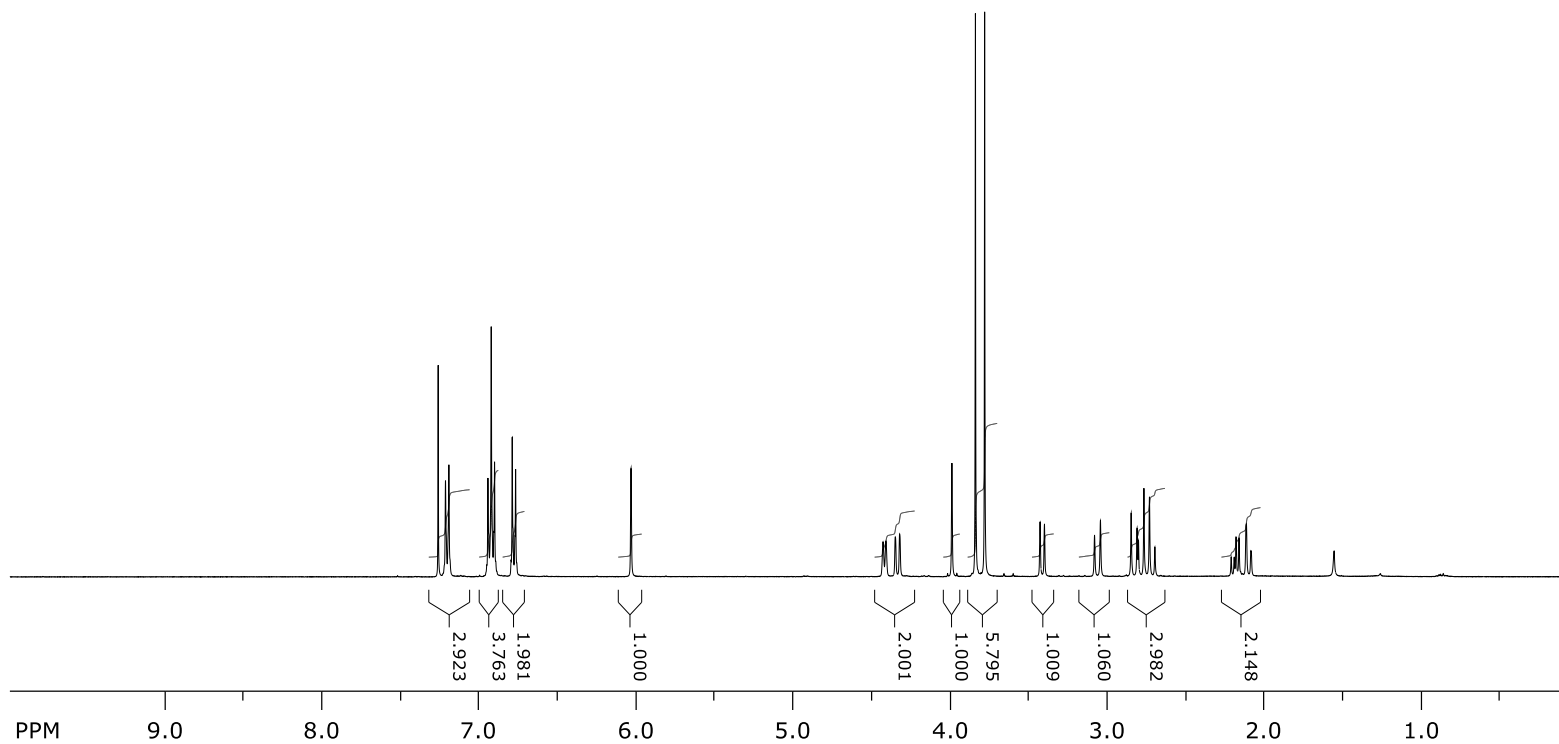

**$^{13}\text{C}\{^1\text{H}\}$  NMR of (1*R*,2*R*,5*S*)-2-Chloro-7,7-bis(4-methoxybenzyl)-3,8-dioxabicyclo[3.2.1]octane (11f).**

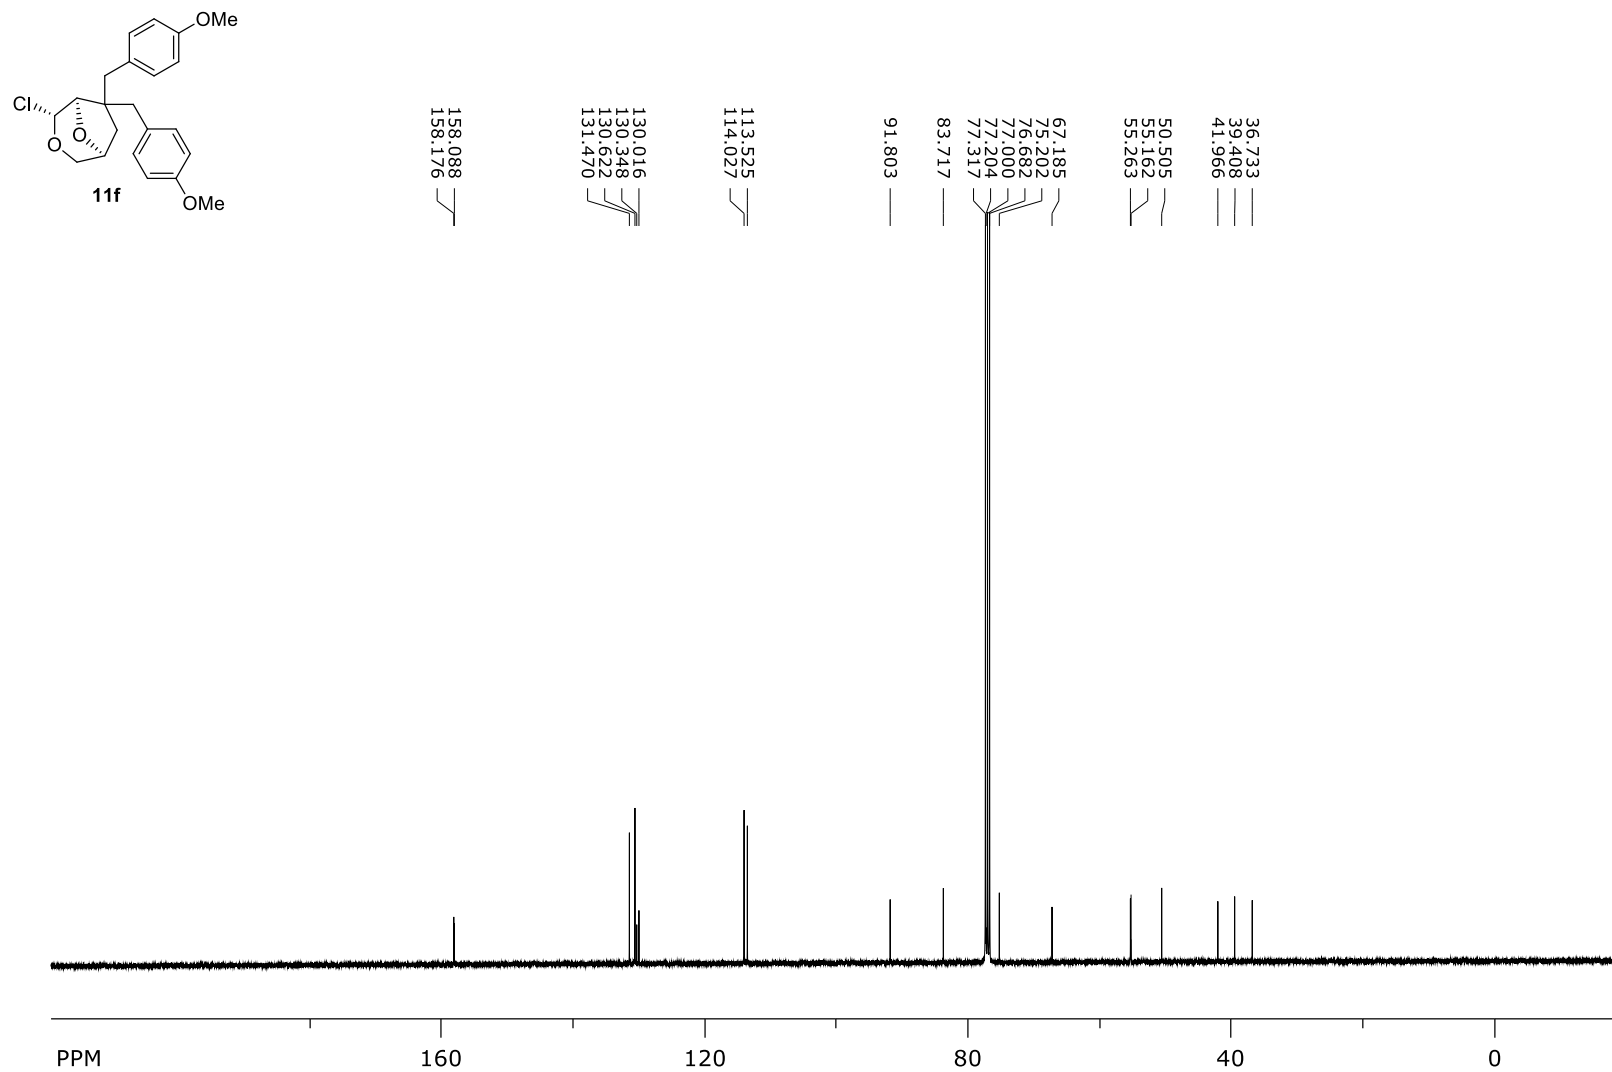

**$^1\text{H}$  NMR of (1*R*,2*S*,5*S*)-7,7-Dibenzyl-3,8-dioxabicyclo[3.2.1]octan-2-ol (12a)**

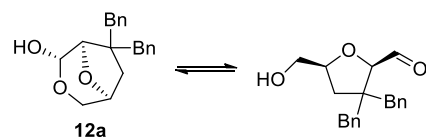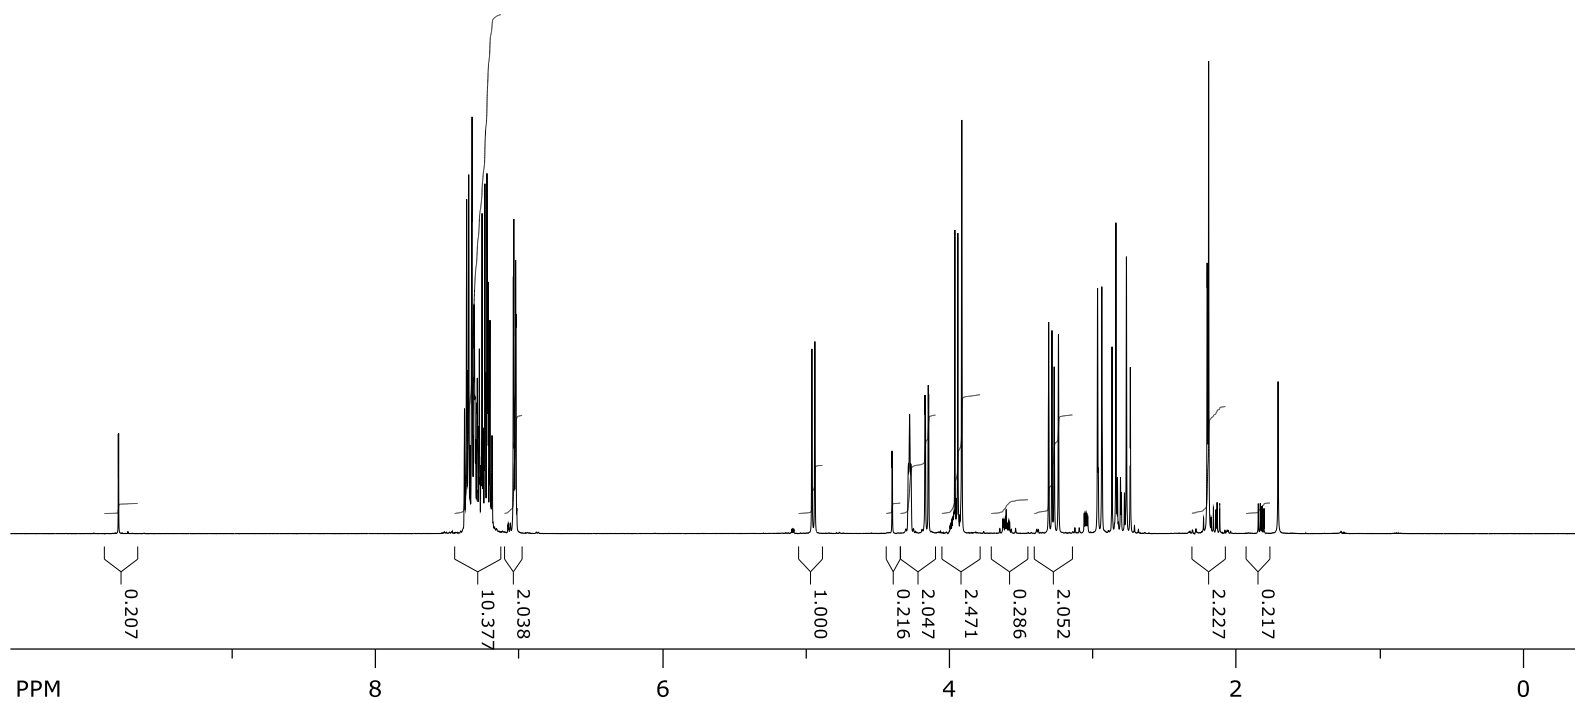

<sup>13</sup>C{<sup>1</sup>H} NMR of (1*R*,2*S*,5*S*)-7,7-Dibenzyl-3,8-dioxabicyclo[3.2.1]octan-2-ol (12a)

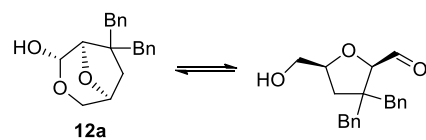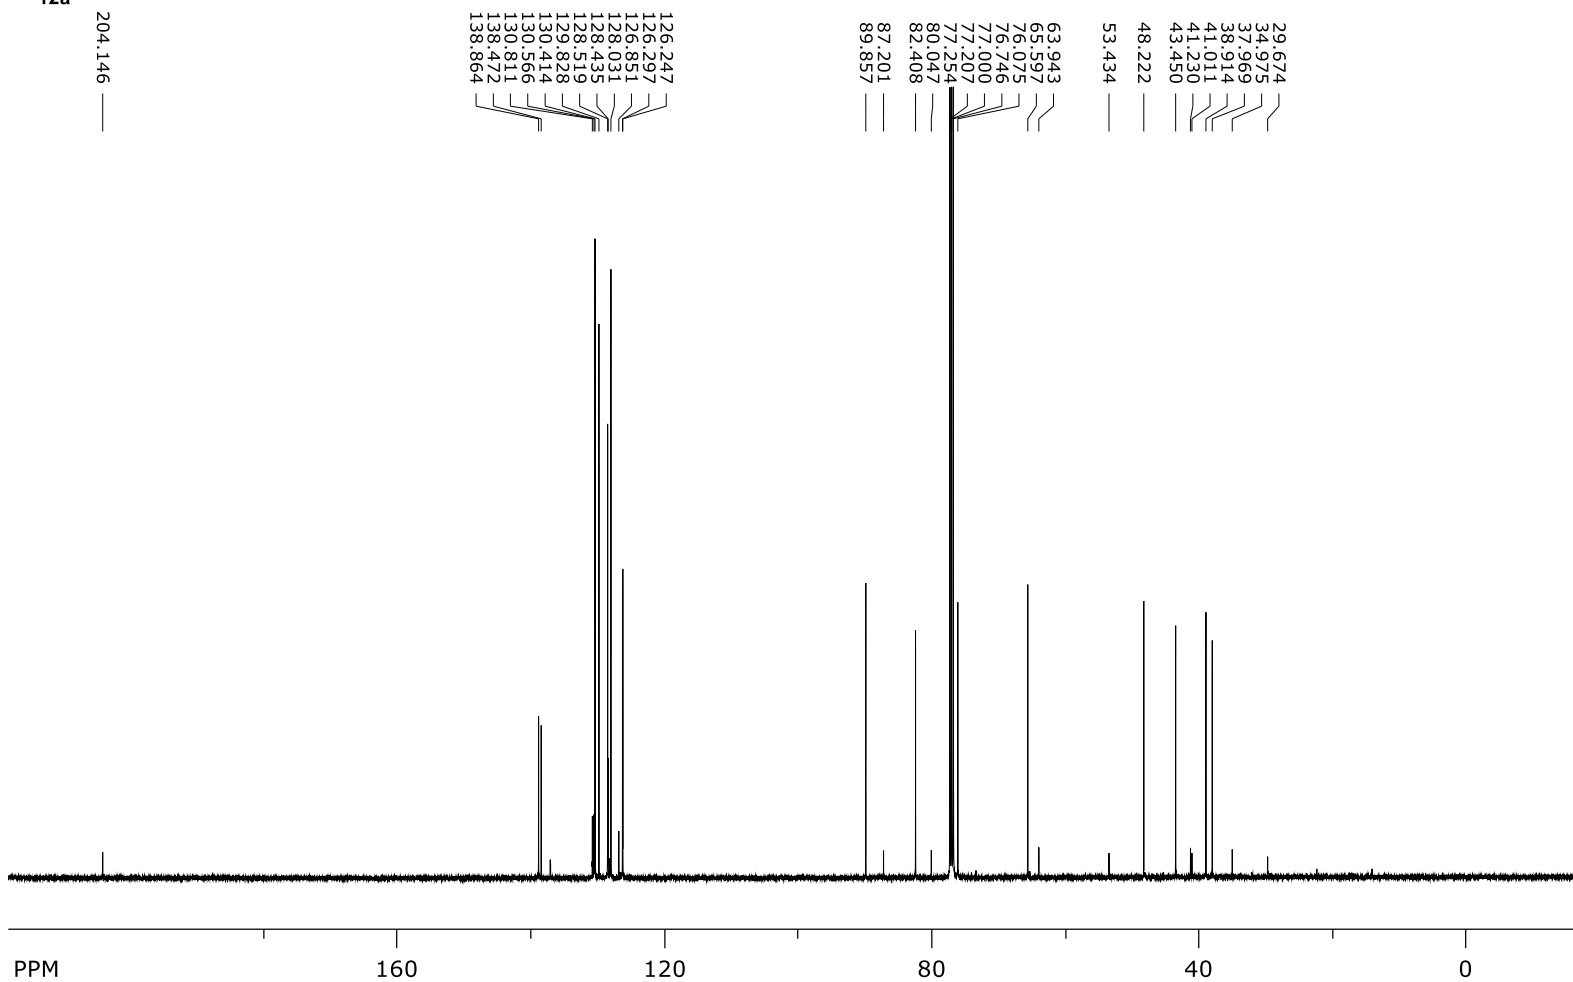

**<sup>1</sup>H NMR of (1*R*,2*S*,5*S*)-7,7-Bis(2-methylbenzyl)-3,8-dioxabicyclo[3.2.1]octan-2-ol (12c)**

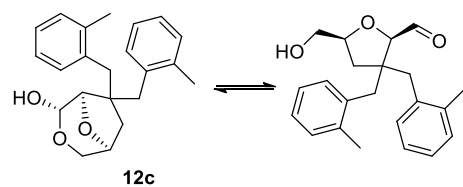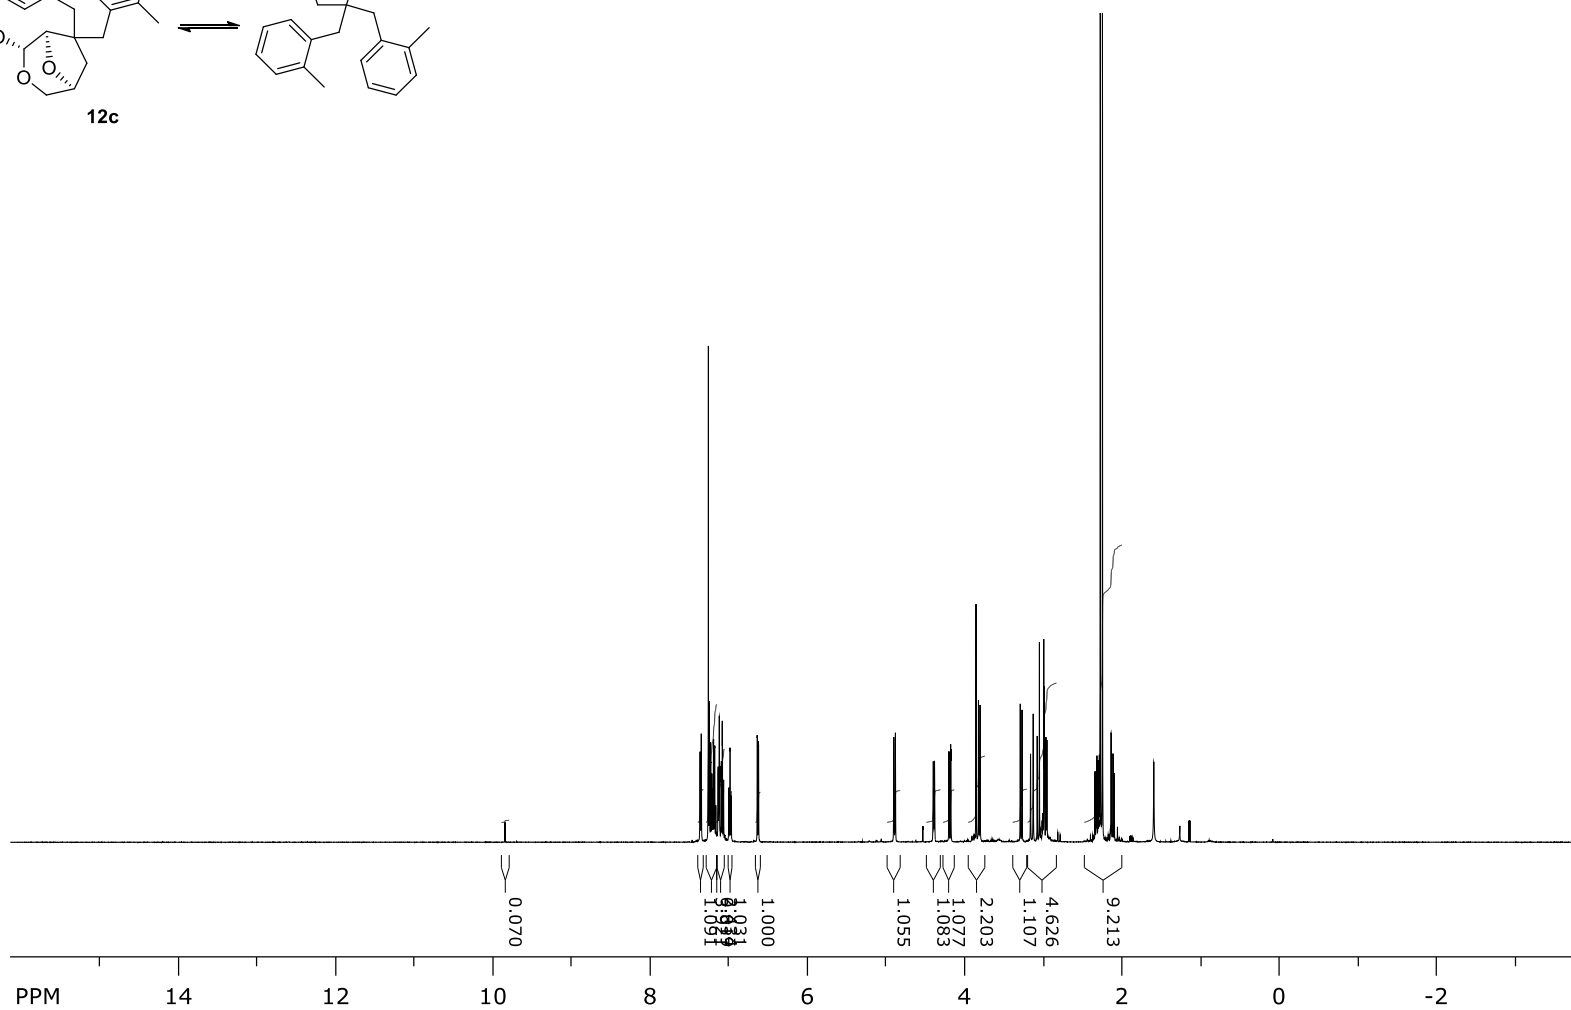

**$^{13}\text{C}\{^1\text{H}\}$  NMR of (1*R*,2*S*,5*S*)-7,7-Bis(2-methylbenzyl)-3,8-dioxabicyclo[3.2.1]octan-2-ol (12c).**

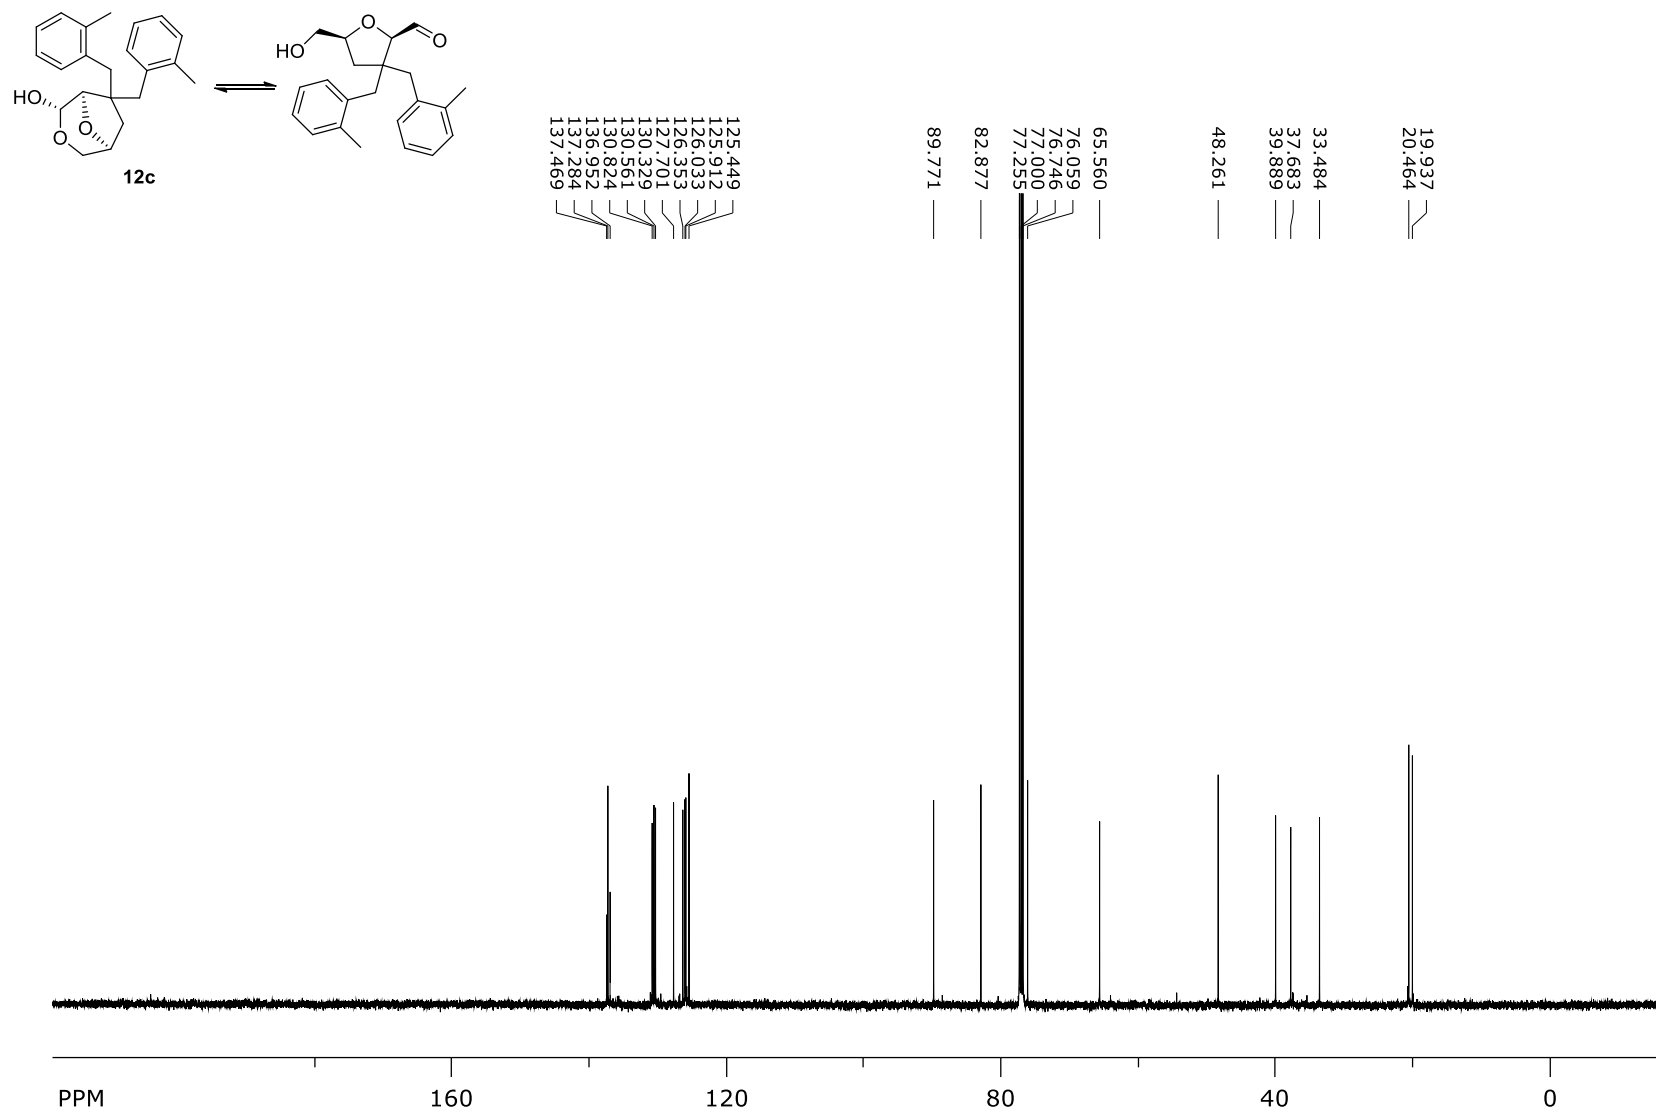



**<sup>1</sup>H NMR of (1*S*,4*S*,5*R*)-1',3'-Dihydro-3,8-dioxaspiro[bicyclo[3.2.1]octane-6,2'-inden]-4-ol (12d)**

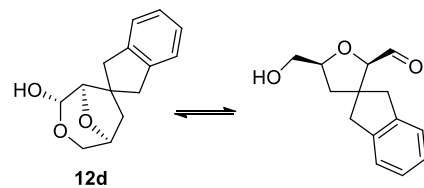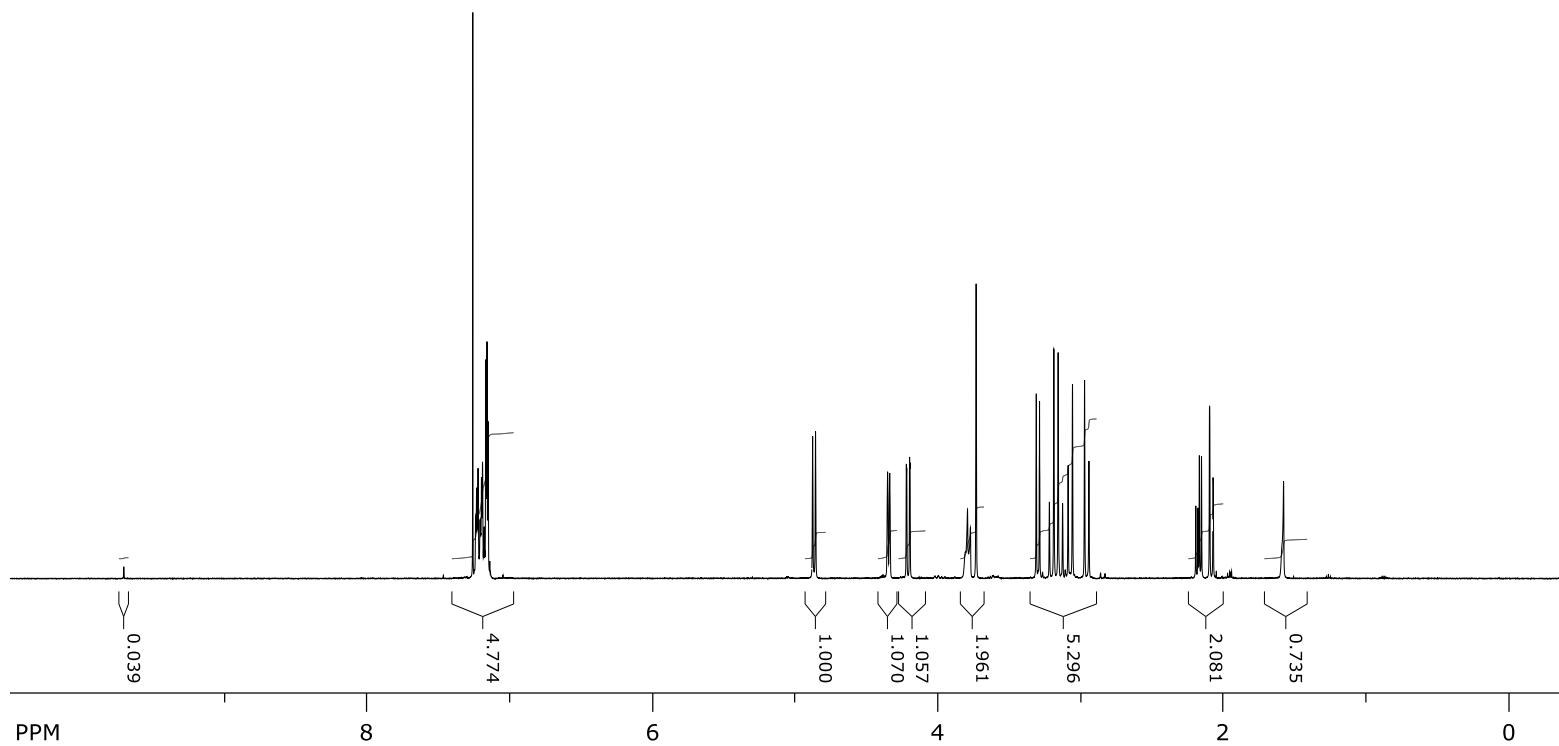

$^{13}\text{C}\{^1\text{H}\}$  NMR of (1*S*,4*S*,5*R*)-1',3'-Dihydro-3,8-dioxaspiro[bicyclo[3.2.1]octane-6,2'-inden]-4-ol (12d).

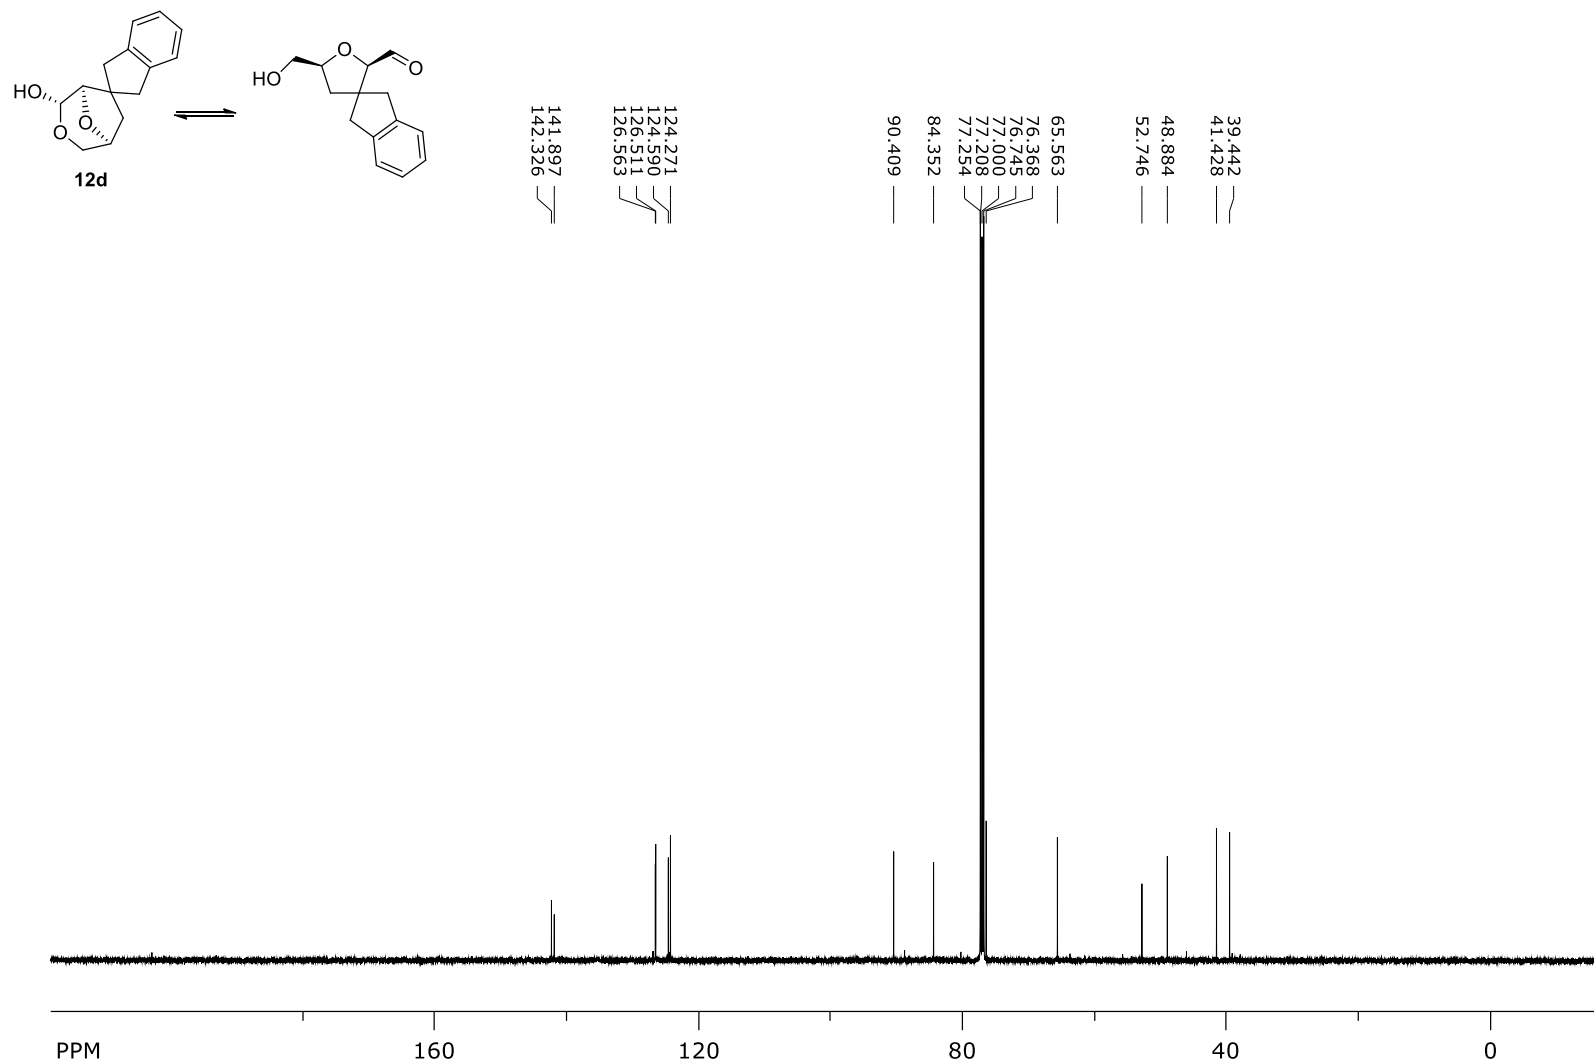

**<sup>1</sup>H NMR of (1*R*,2*S*,5*S*)-7,7-Dimethyl-3,8-dioxabicyclo[3.2.1]octan-2-ol (12e)**

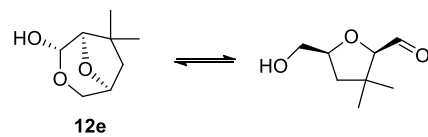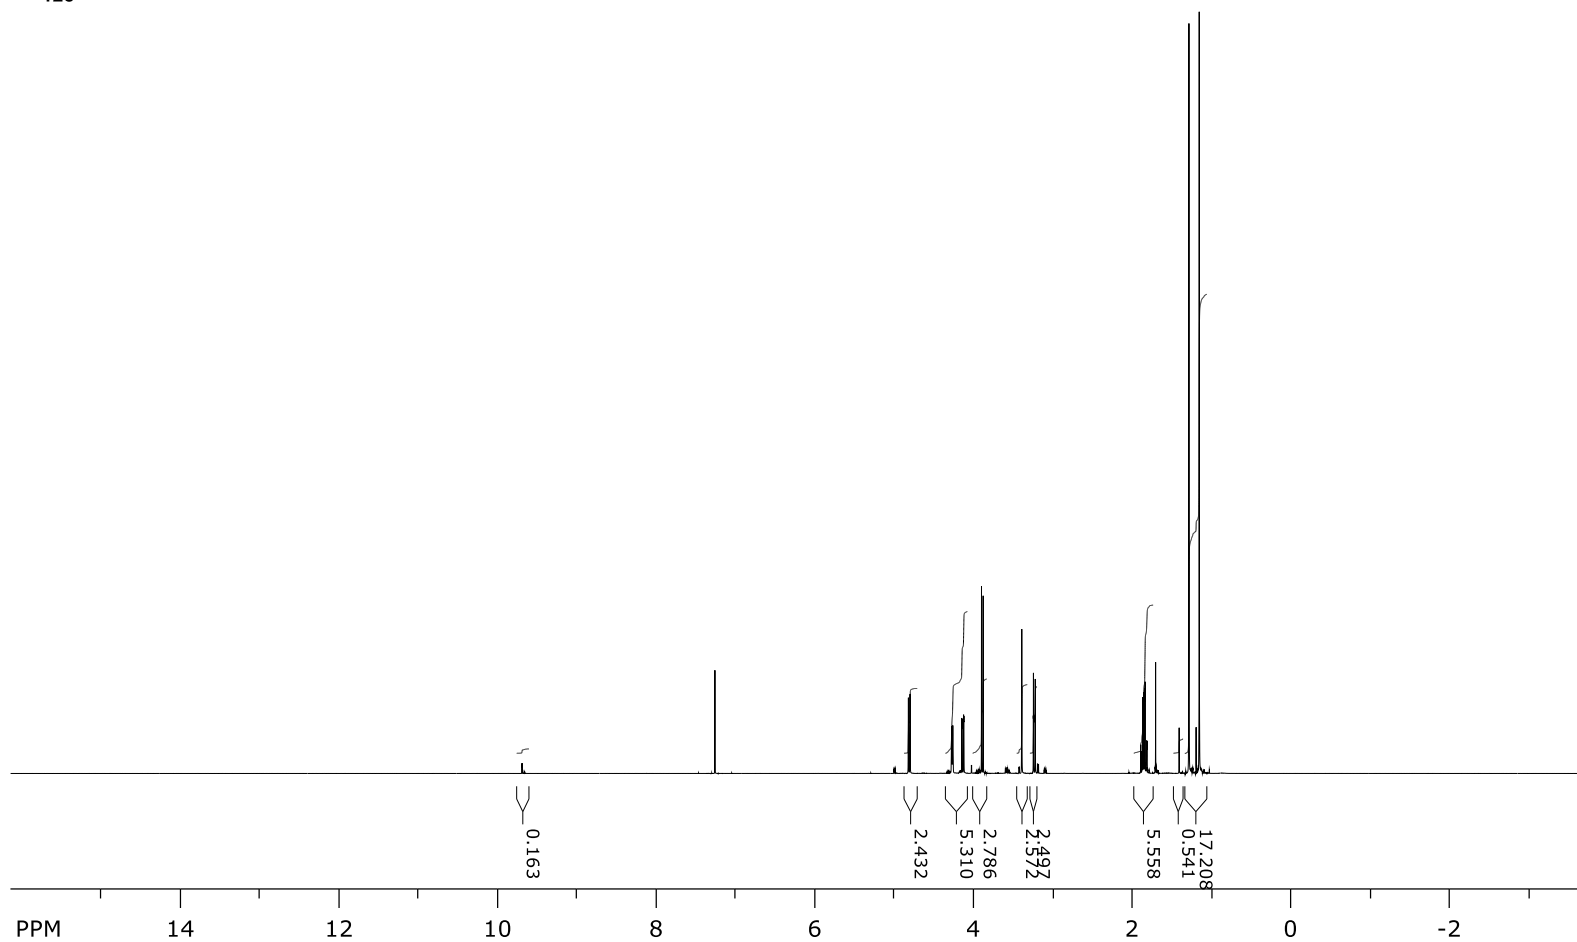

**$^{13}\text{C}\{^1\text{H}\}$  NMR of (1*R*,2*S*,5*S*)-7,7-Dimethyl-3,8-dioxabicyclo[3.2.1]octan-2-ol (12e)**

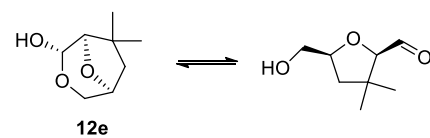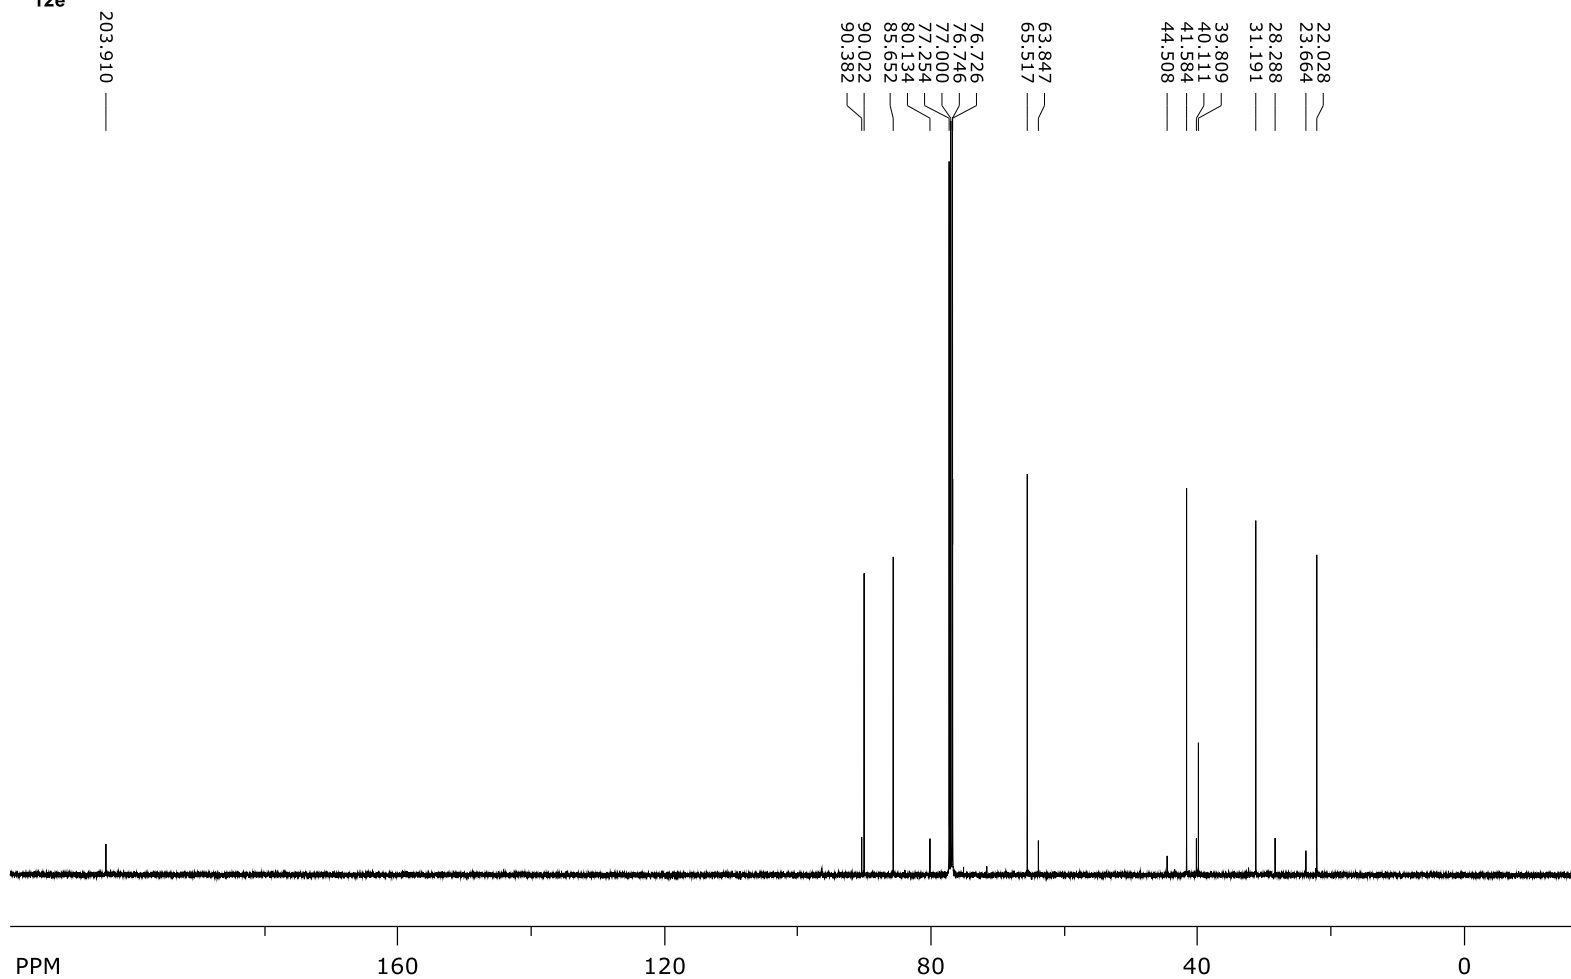

**<sup>1</sup>H NMR of (1*R*,2*S*,5*S*)-7,7-Bis(4-methoxybenzyl)-3,8-dioxabicyclo[3.2.1]octan-2-ol (12f)**

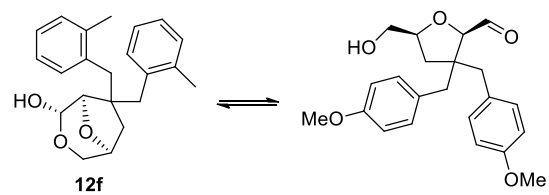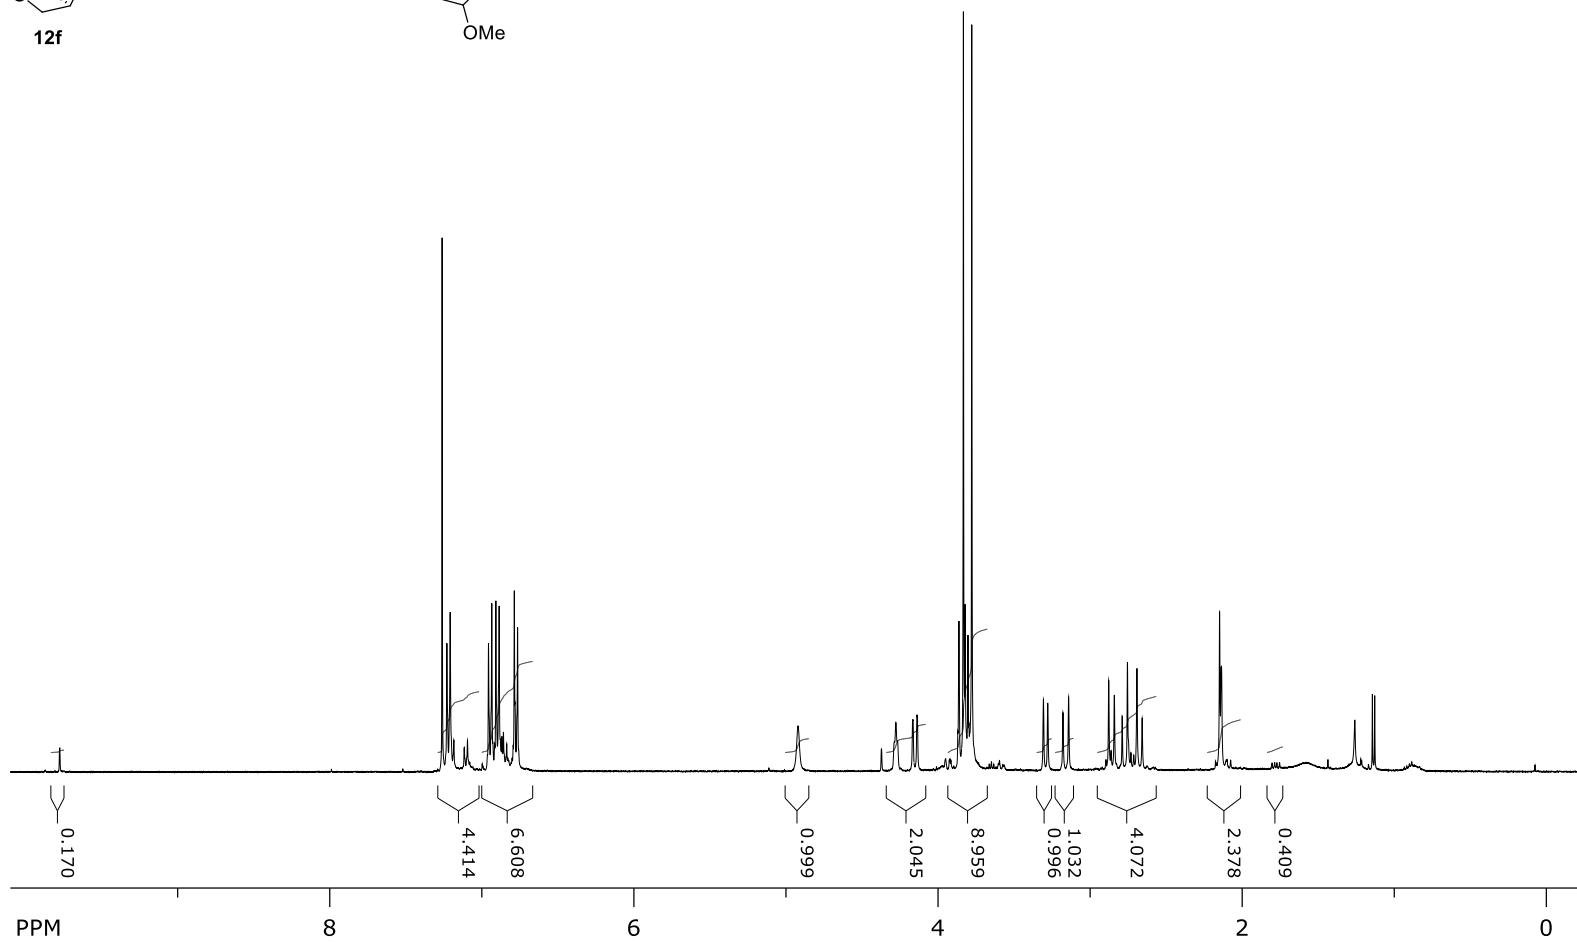

**$^{13}\text{C}\{^1\text{H}\}$  NMR of (1*R*,2*S*,5*S*)-7,7-Bis(4-methoxybenzyl)-3,8-dioxabicyclo[3.2.1]octan-2-ol (12f).**

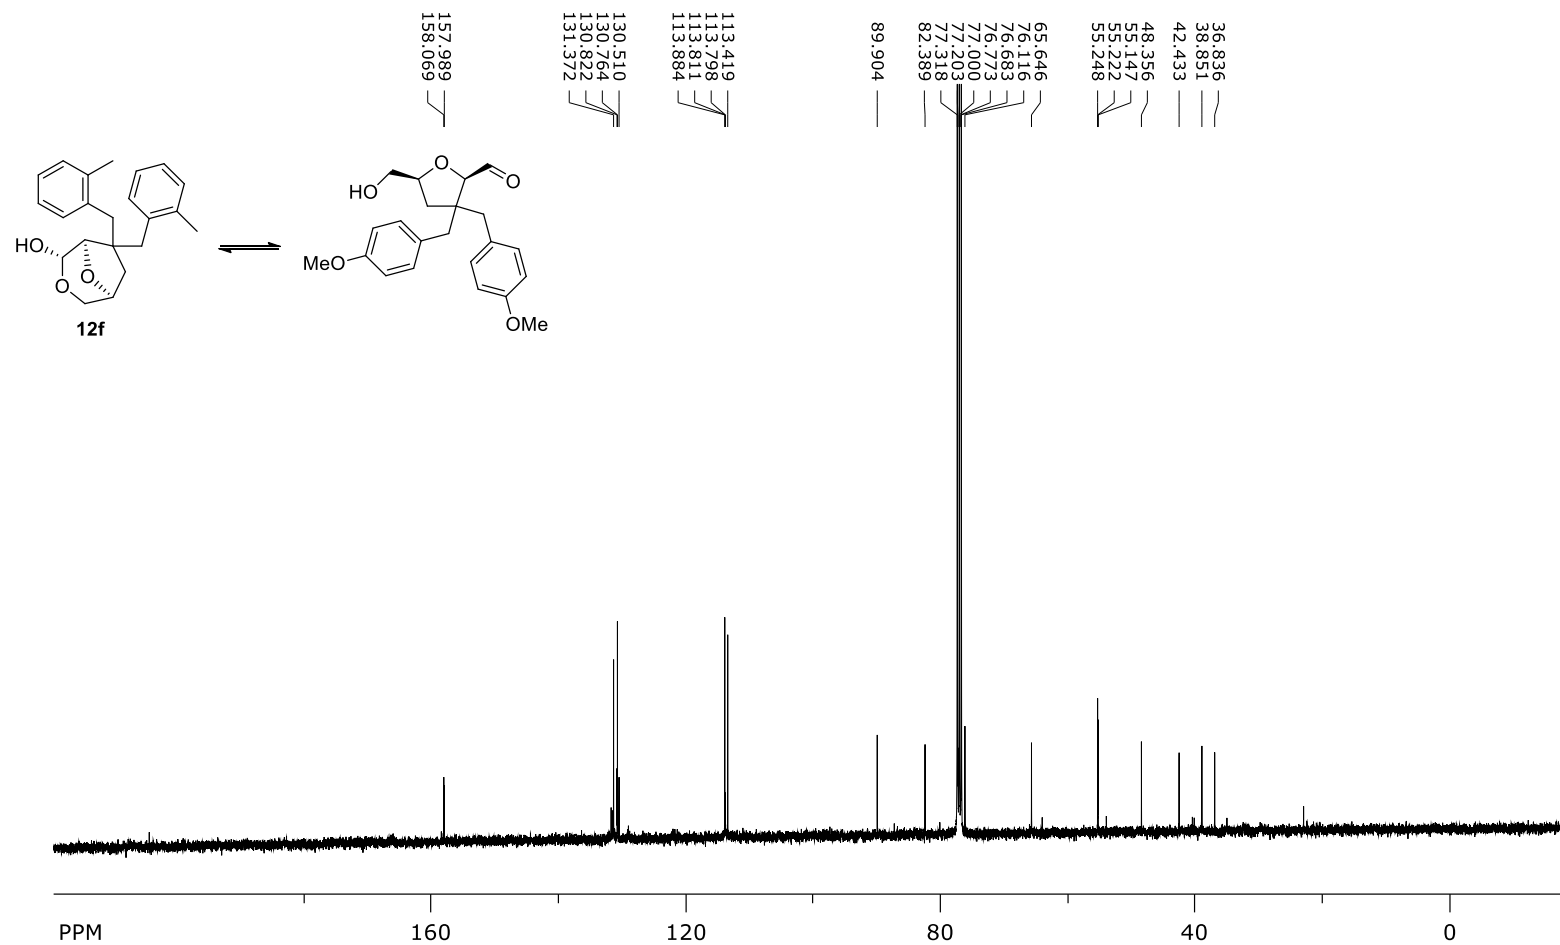

**$^1\text{H}$  NMR of Di((1*S*,4*S*,5*R*)-6,8-dioxabicyclo[3.2.1]octan-4-yl)sulfite (13b)**

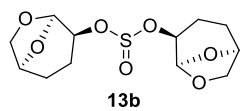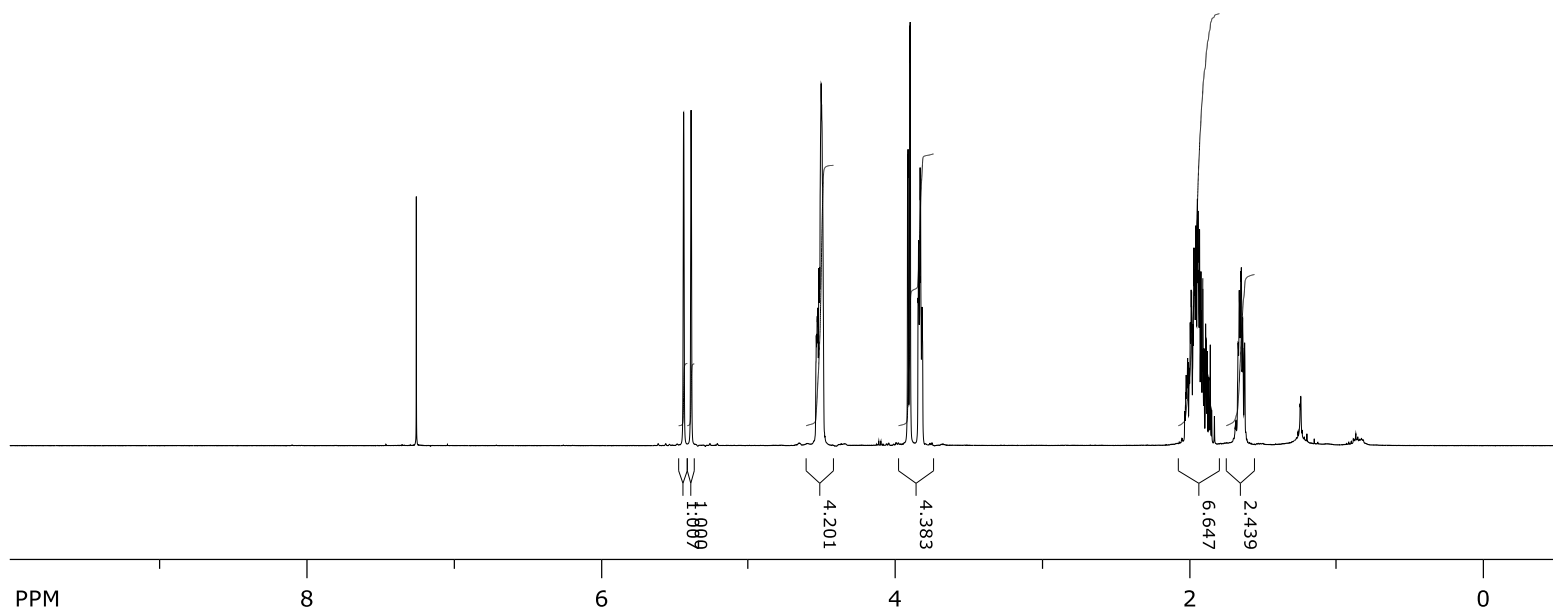

$^{13}\text{C}\{^1\text{H}\}$  NMR of Di((1*S*,4*S*,5*R*)-6,8-dioxabicyclo[3.2.1]octan-4-yl)sulfite (13b)

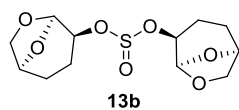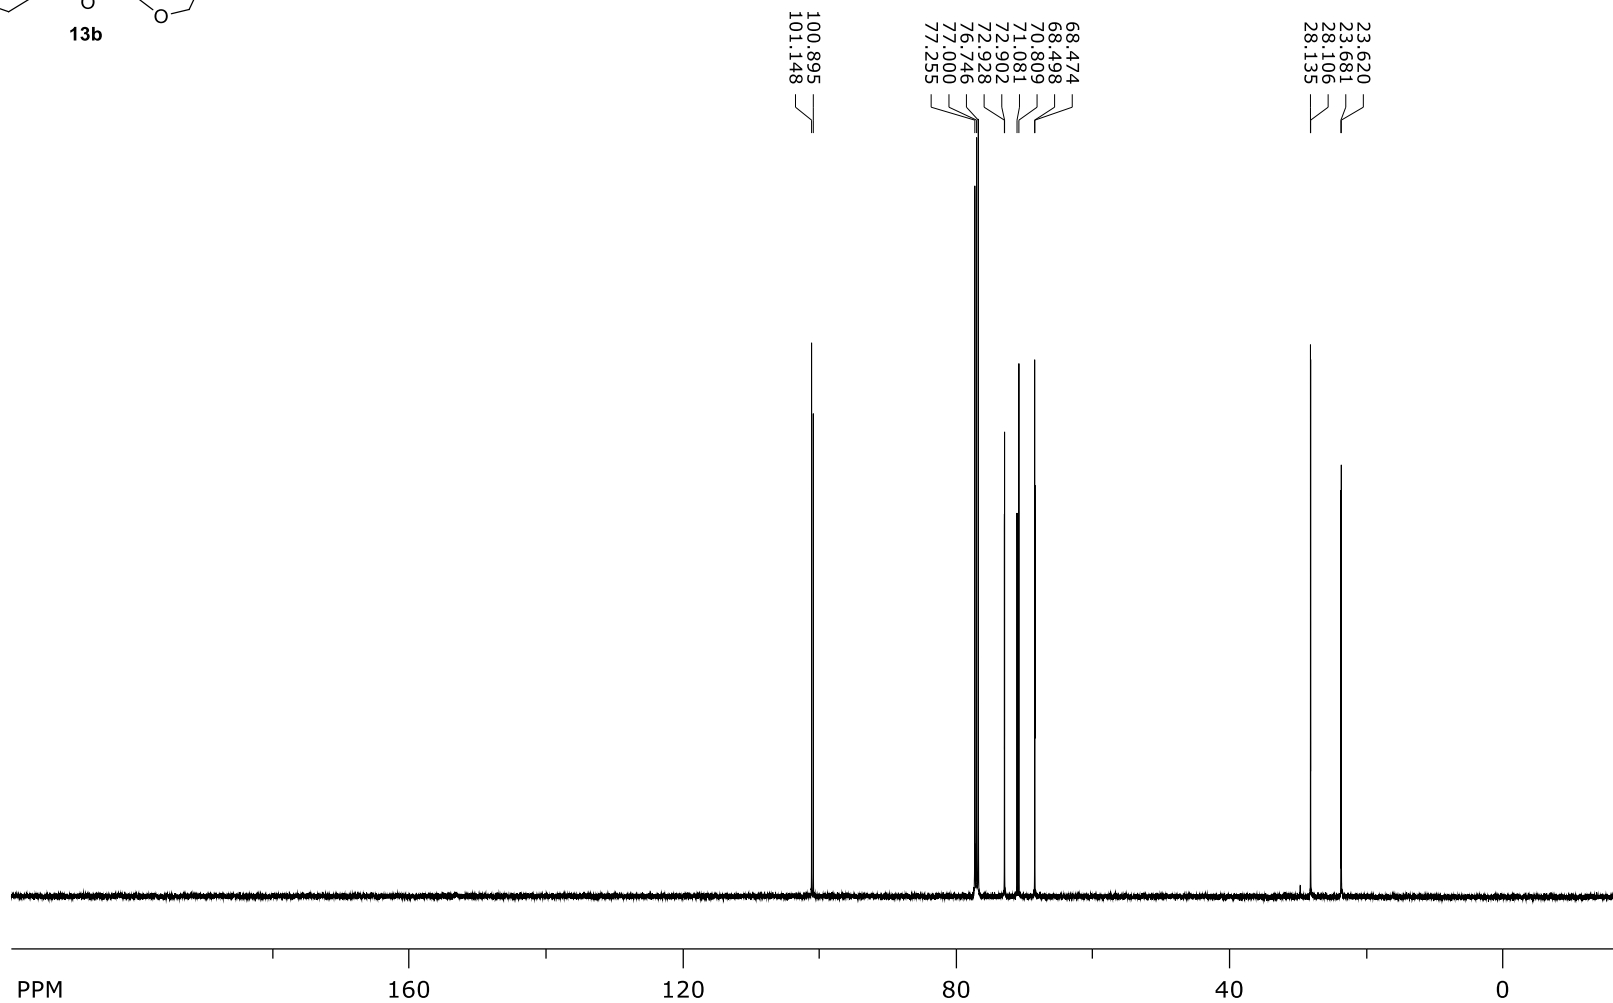



**<sup>1</sup>H NMR of Bis((1*S*,4*S*,5*R*)-1',3'-dihydro-6,8-dioxaspiro[bicyclo[3.2.1]octane-3,2'-inden]-4-yl)sulphite (13d)**

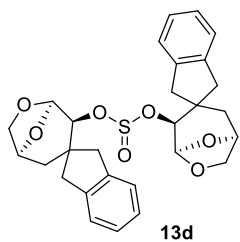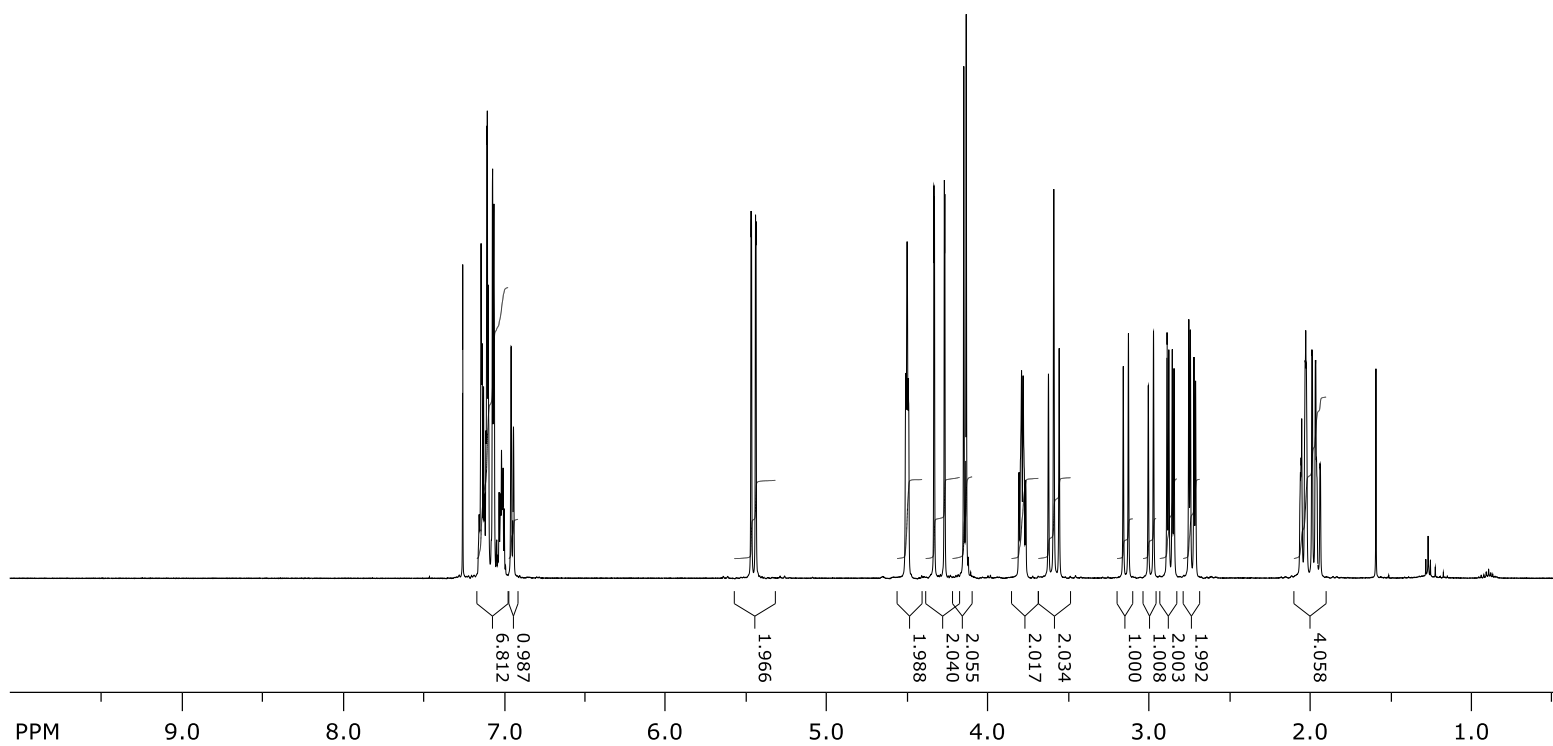

$^{13}\text{C}\{^1\text{H}\}$  NMR of Bis((1*S*,4*S*,5*R*)-1',3'-dihydro-6,8-dioxaspiro[bicyclo[3.2.1]octane-3,2'-inden]-4-yl)sulphite (13d)

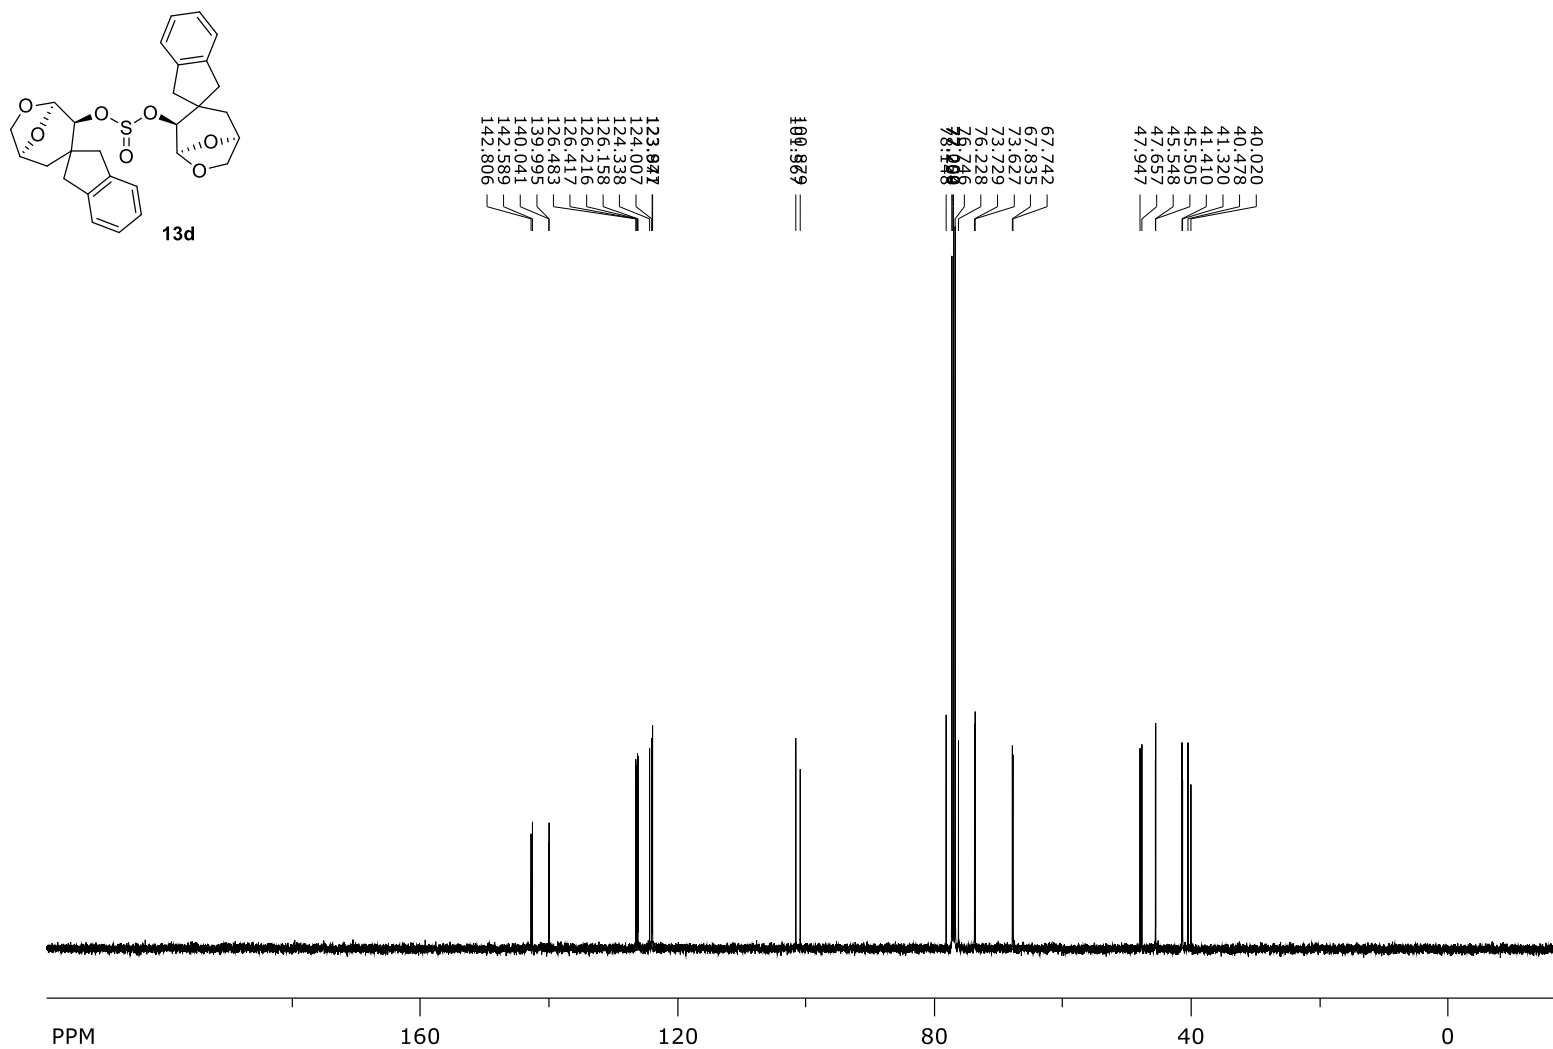

**<sup>1</sup>H NMR of Di((1*S*,4*S*,5*R*)-3,3-dimethyl-6,8-dioxabicyclo[3.2.1]octan-4-yl) sulfite (13e)**

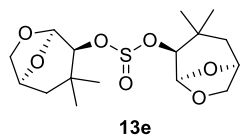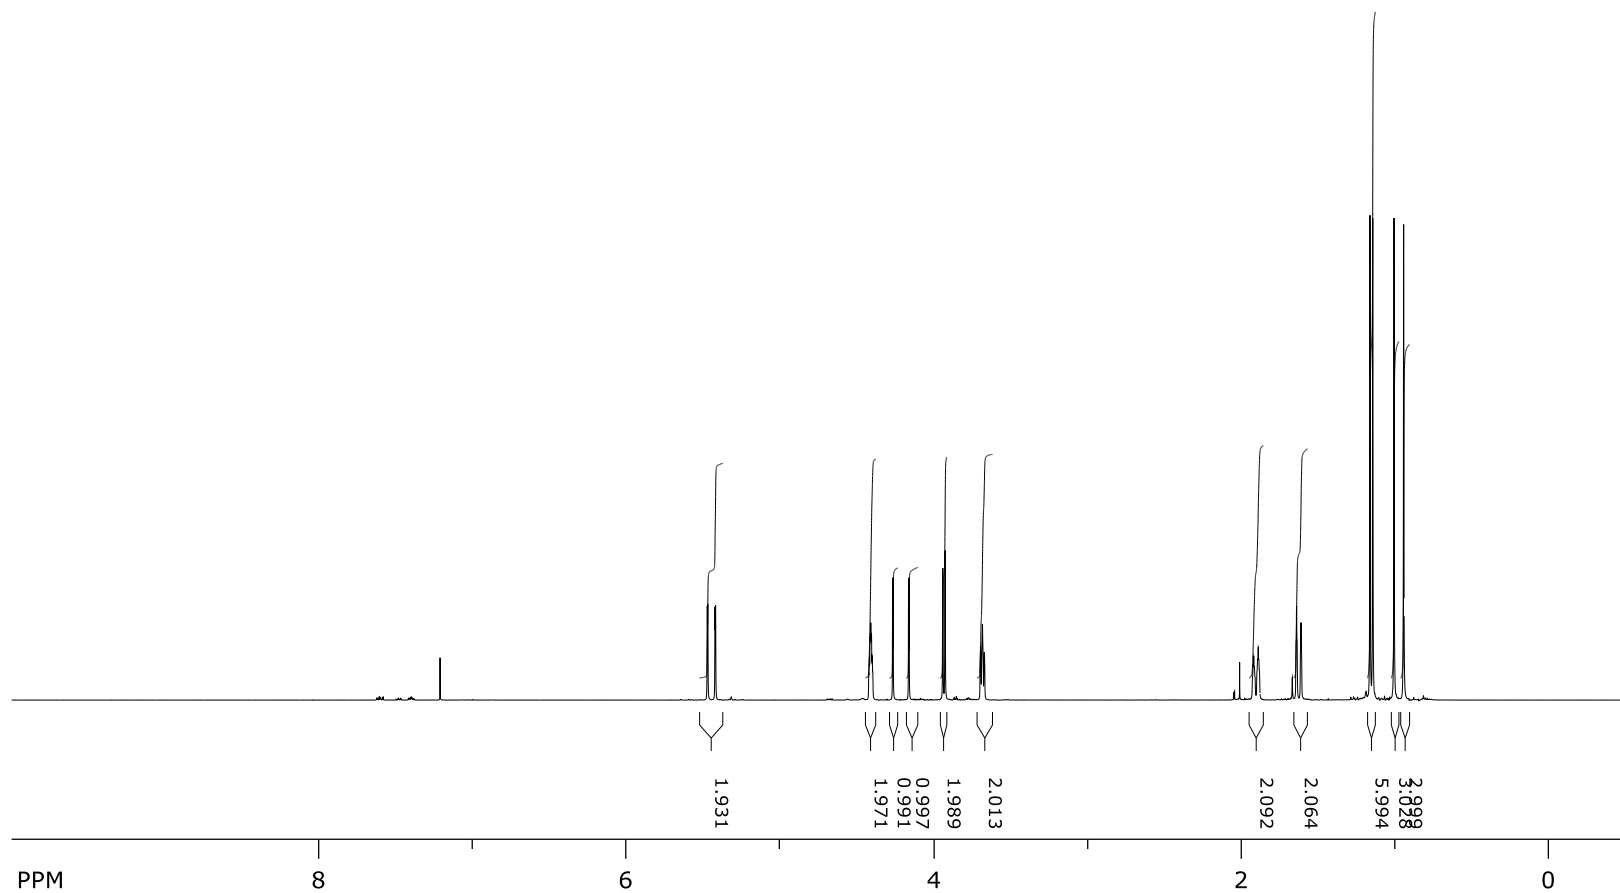

$^{13}\text{C}\{^1\text{H}\}$  NMR of Di((1*S*,4*S*,5*R*)-3,3-dimethyl-6,8-dioxabicyclo[3.2.1]octan-4-yl) sulfite (**13e**)

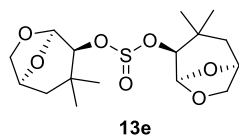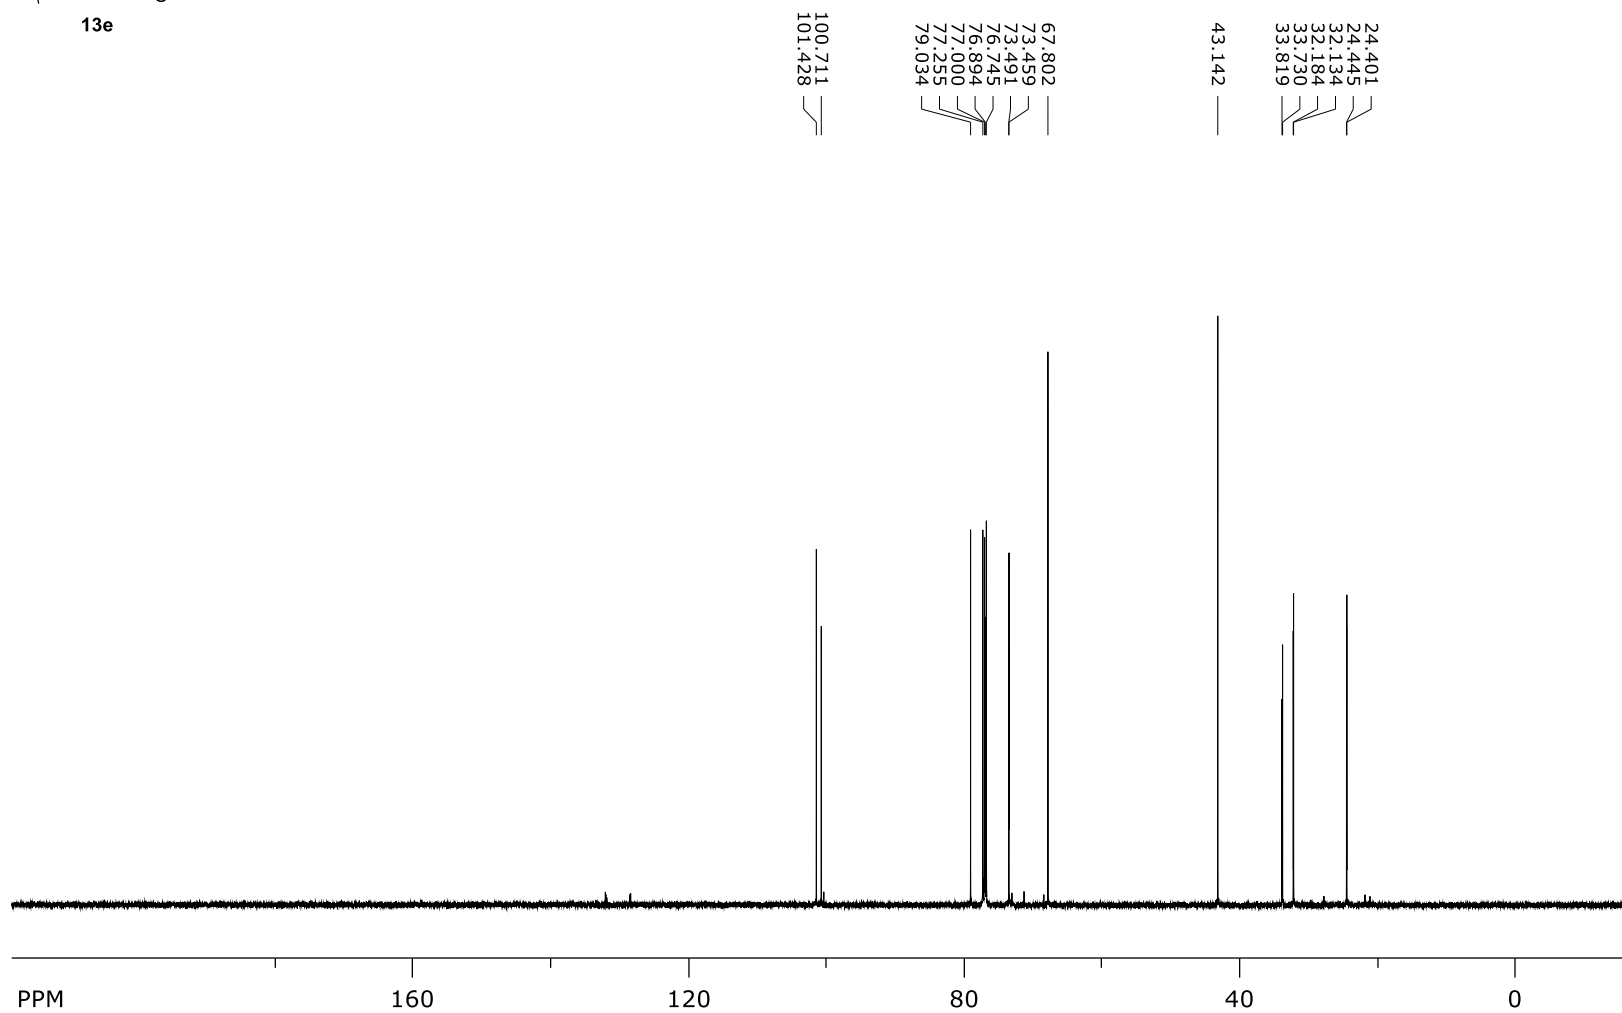

**<sup>1</sup>H NMR of (1*R*,4*S*,5*R*)-4-Chloro-6,8-dioxabicyclo[3.2.1]oct-2-ene (16)**

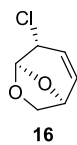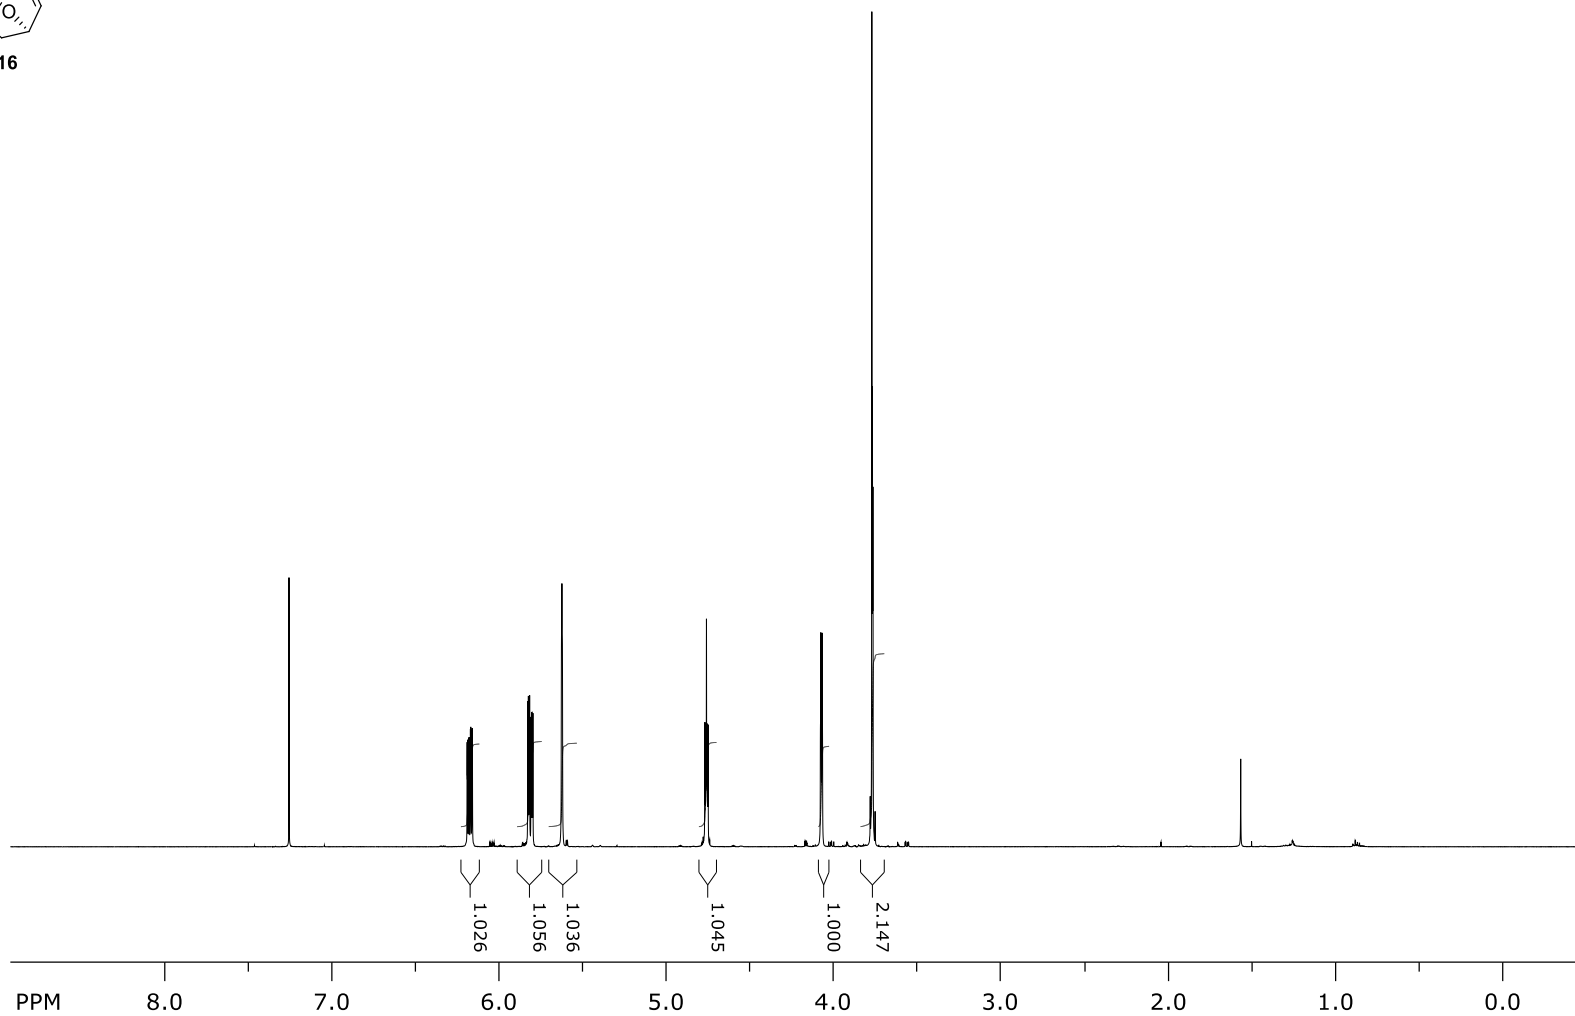

$^{13}\text{C}\{^1\text{H}\}$  NMR of (1*R*,4*S*,5*R*)-4-Chloro-6,8-dioxabicyclo[3.2.1]oct-2-ene (16)

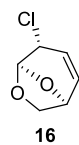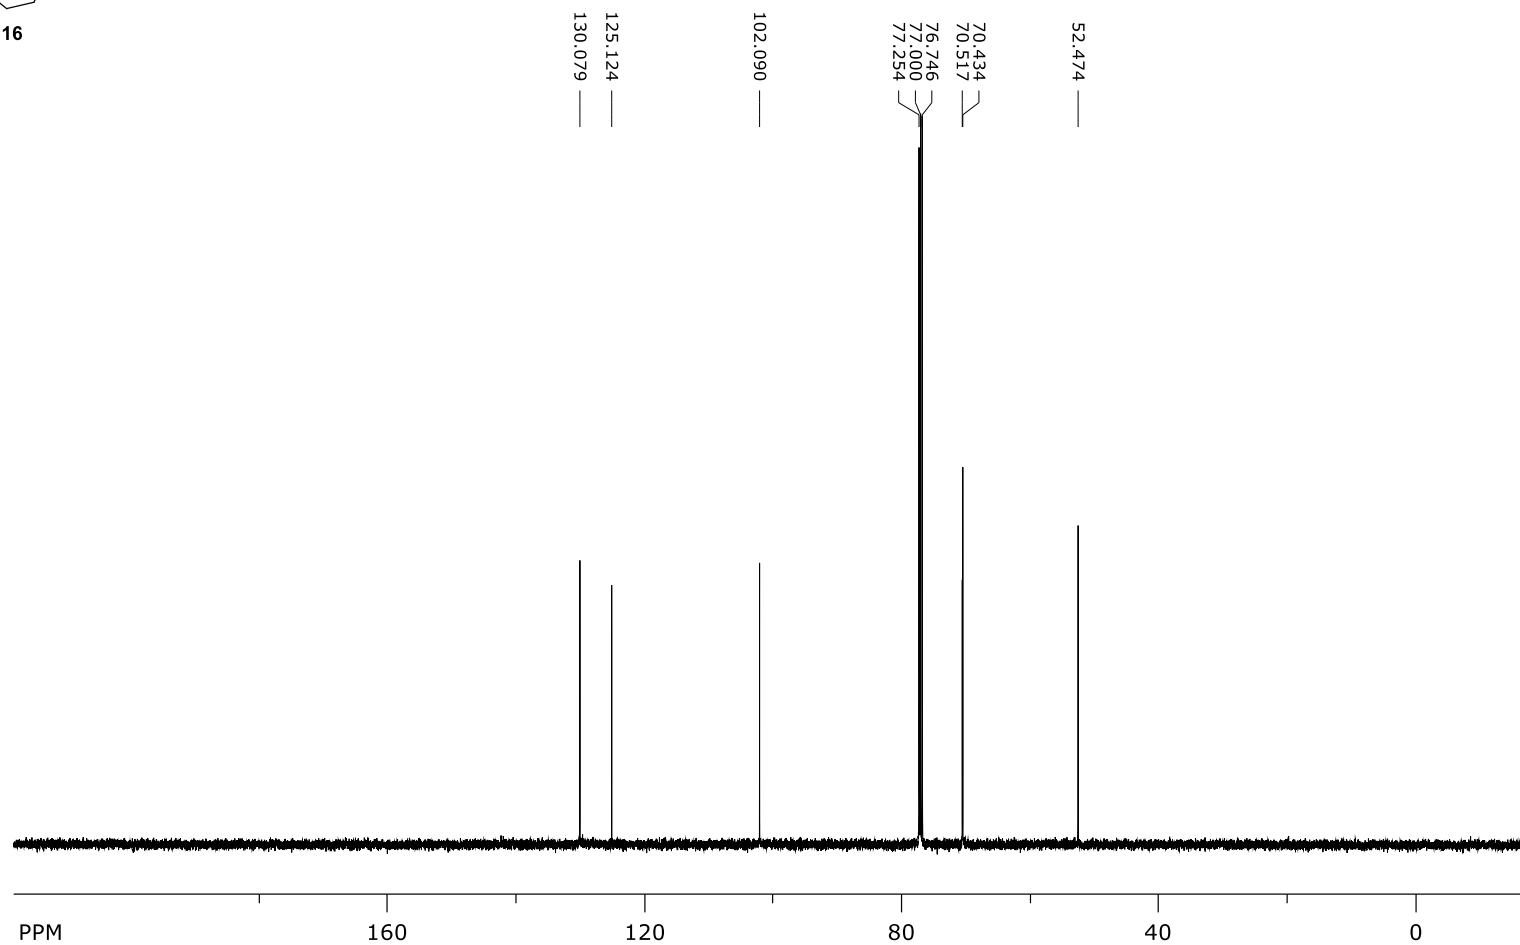

**$^1\text{H}$  NMR of (1*R*,2*R*,5*R*)-2-Chloro-6,8-dioxabicyclo[3.2.1]oct-3-ene (17a)**

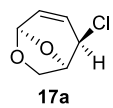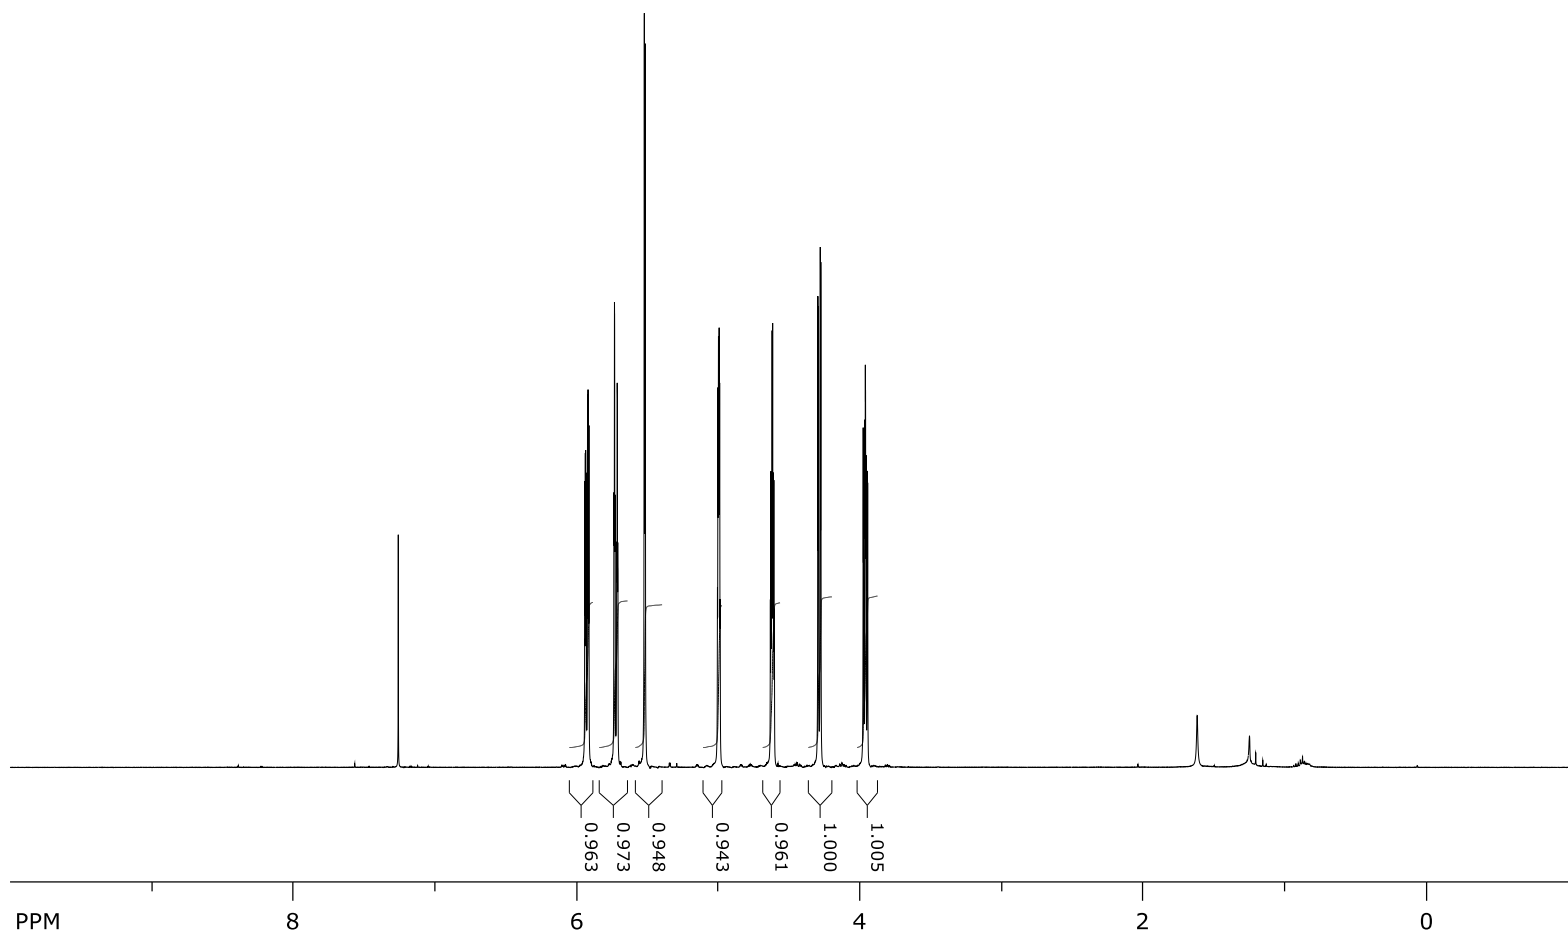

$^{13}\text{C}\{^1\text{H}\}$  NMR of (1*R*,2*R*,5*R*)-2-Chloro-6,8-dioxabicyclo[3.2.1]oct-3-ene (17a)

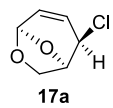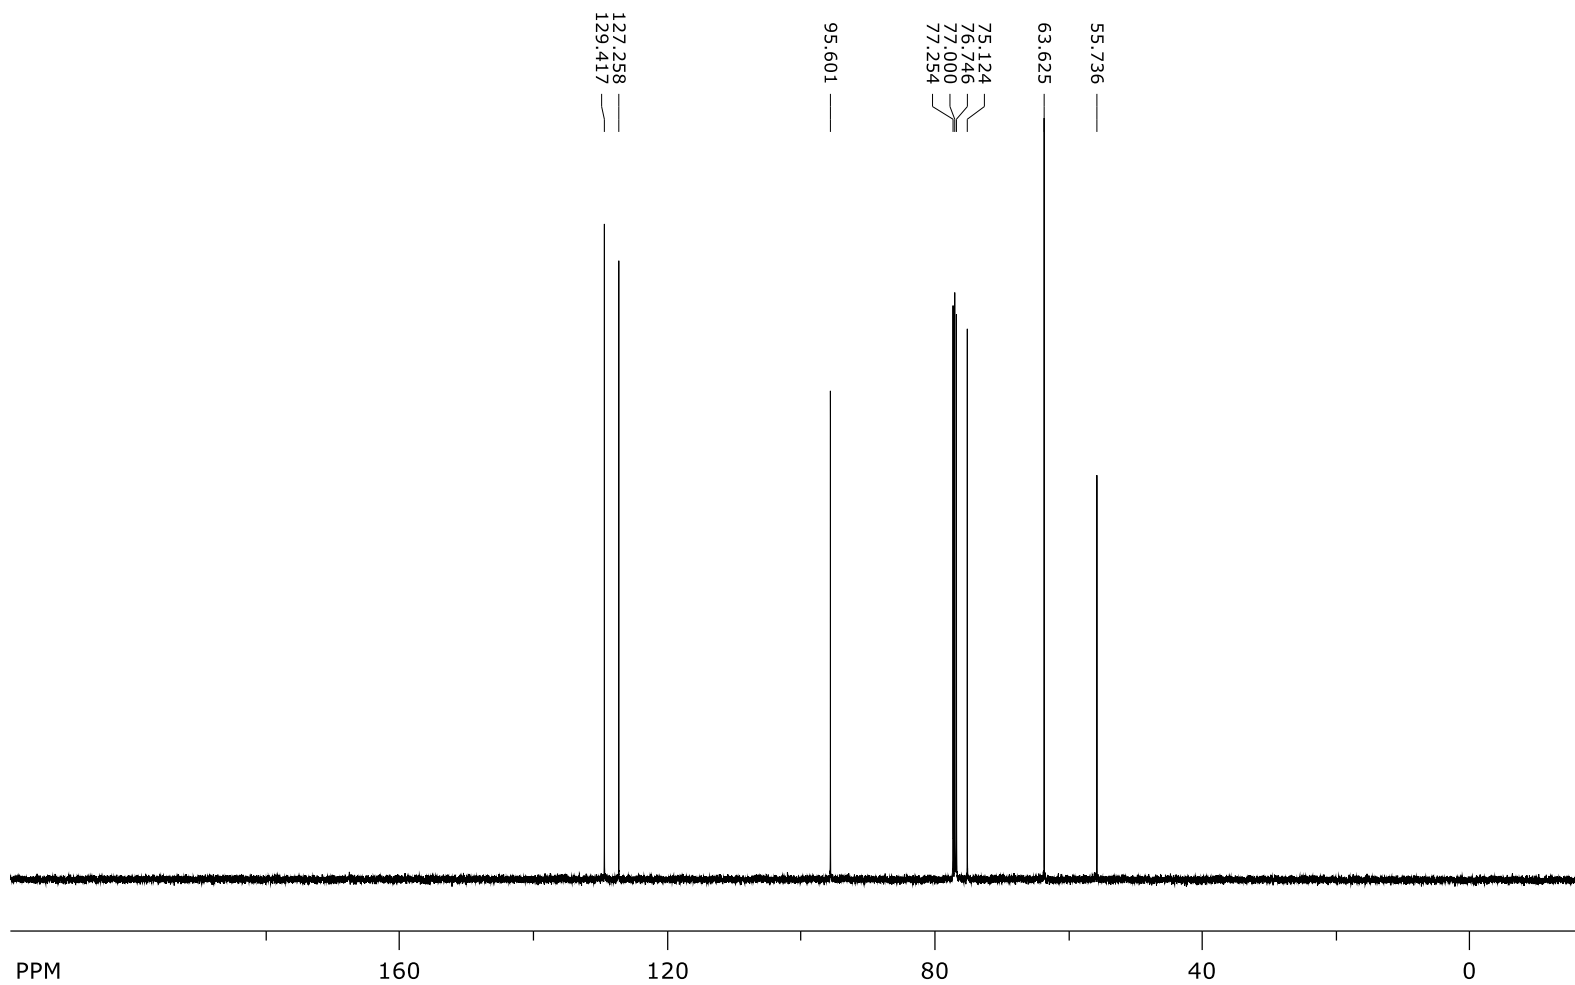



**<sup>1</sup>H NMR of (1*R*,2*S*,5*R*)-2-Chloro-6,8-dioxabicyclo[3.2.1]oct-3-ene (17b)**

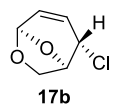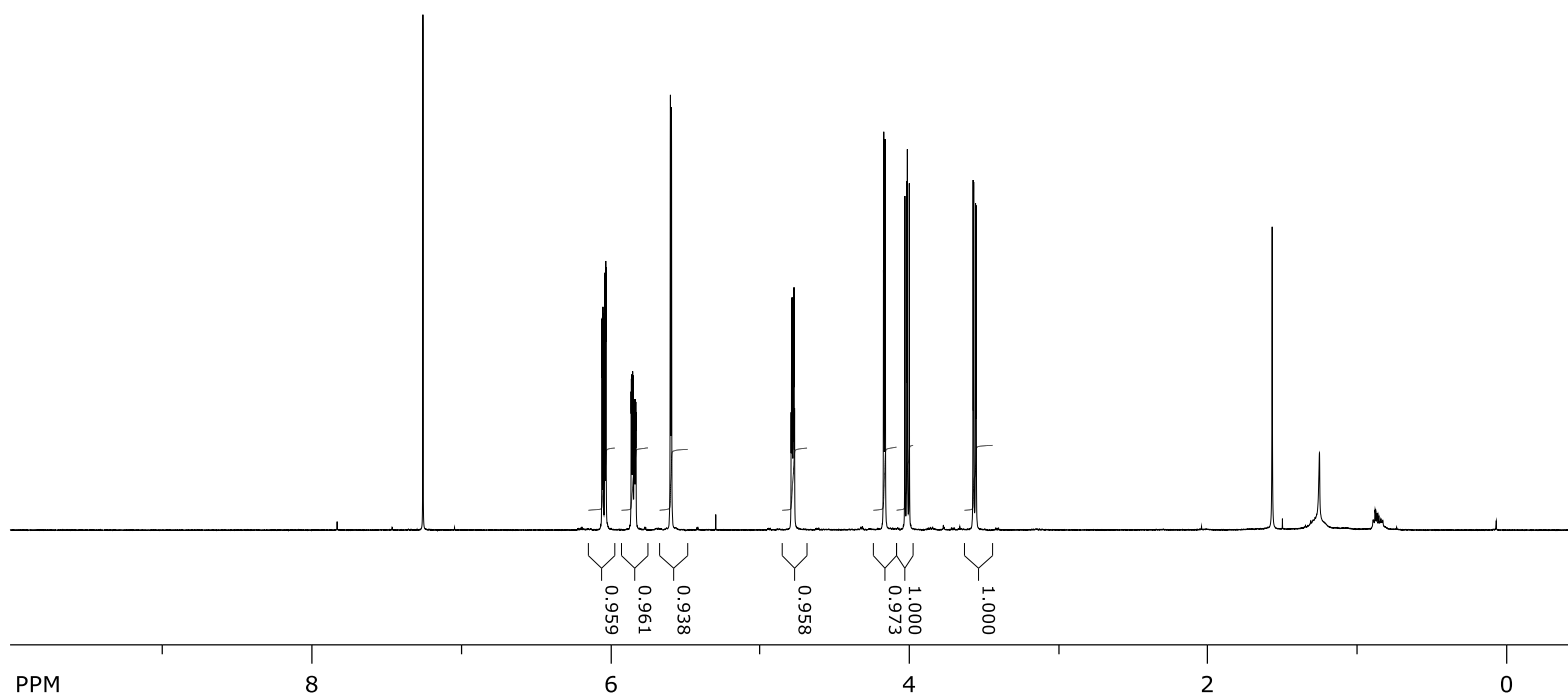

$^{13}\text{C}\{^1\text{H}\}$  NMR of (1*R*,2*S*,5*R*)-2-Chloro-6,8-dioxabicyclo[3.2.1]oct-3-ene (17b)

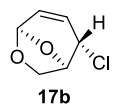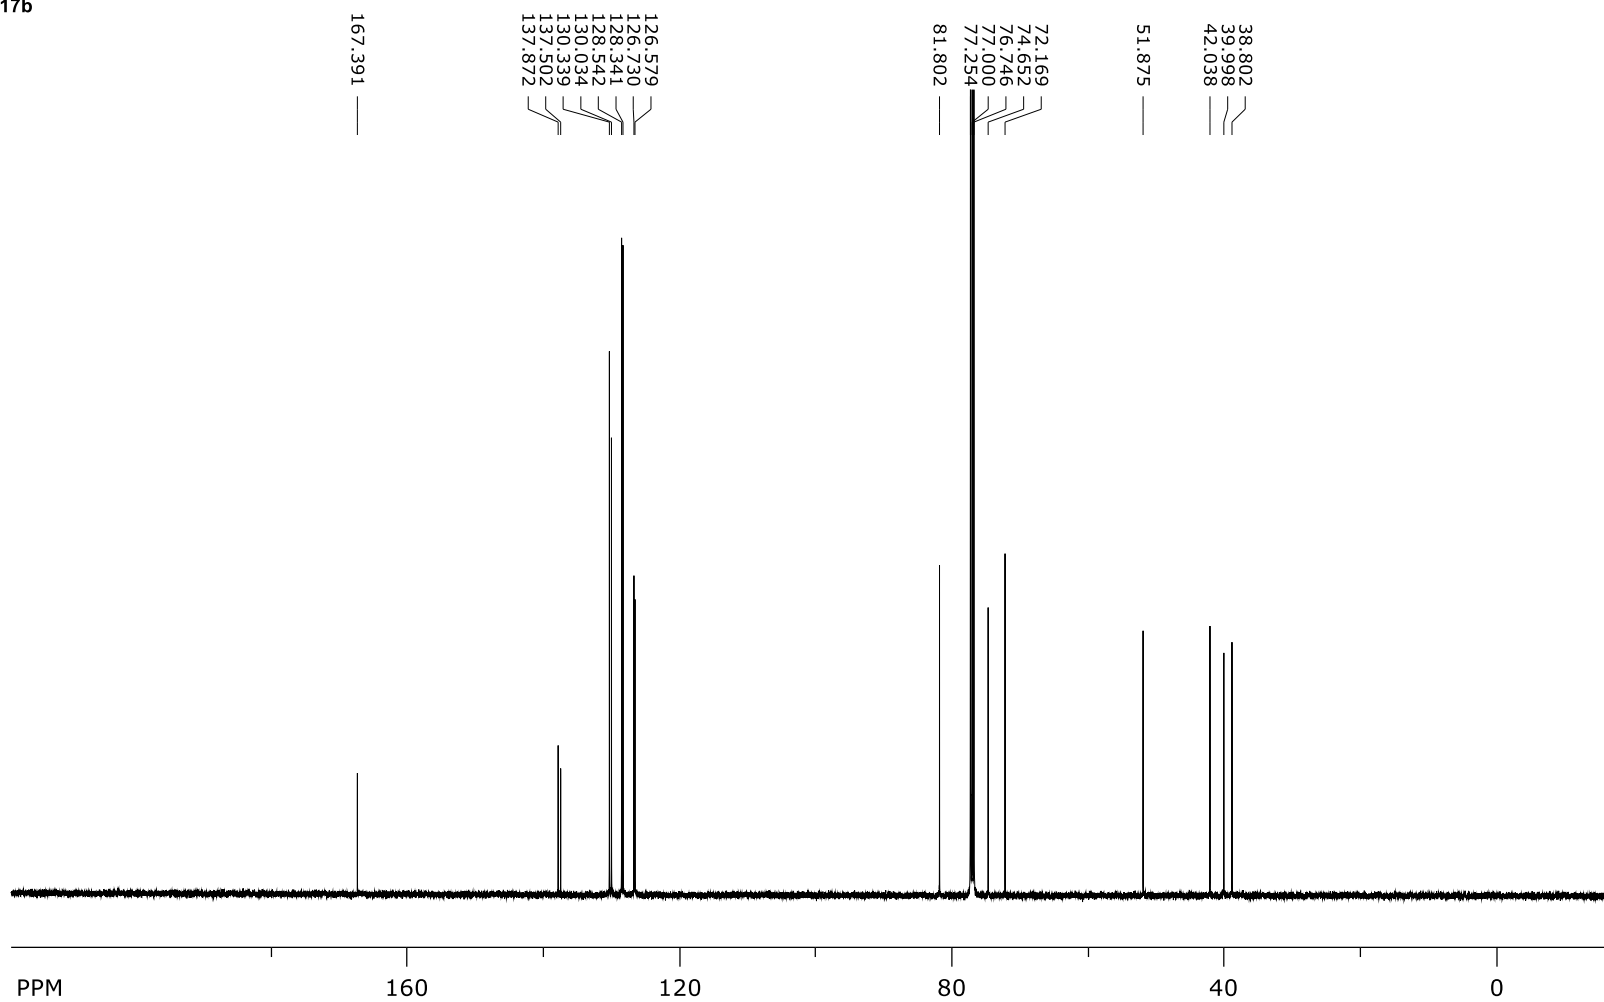

**$^1\text{H}$  NMR of (1*S*,5*R*)-3-((*E*)-Benzylidene)-4-chloro-6,8-dioxabicyclo[3.2.1]octane (19)**

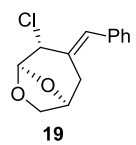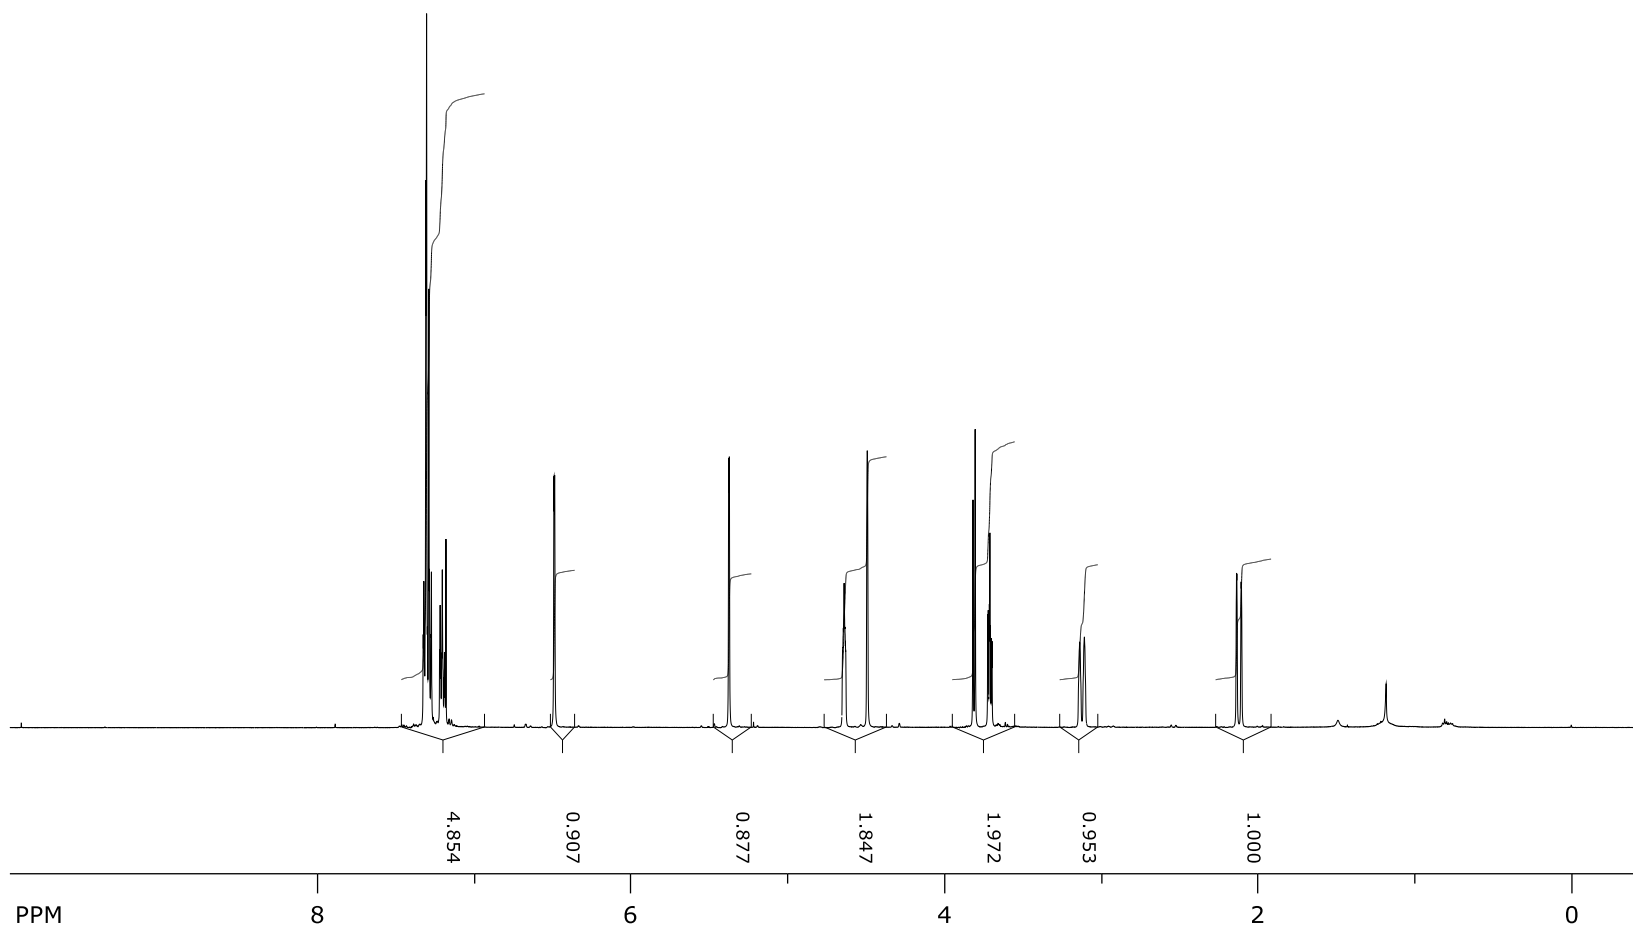

**$^{13}\text{C}\{^1\text{H}\}$  NMR of (1*S*,5*R*)-3-((*E*)-Benzylidene)-4-chloro-6,8-dioxabicyclo[3.2.1]octane (19)**

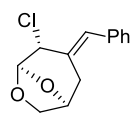

**19**

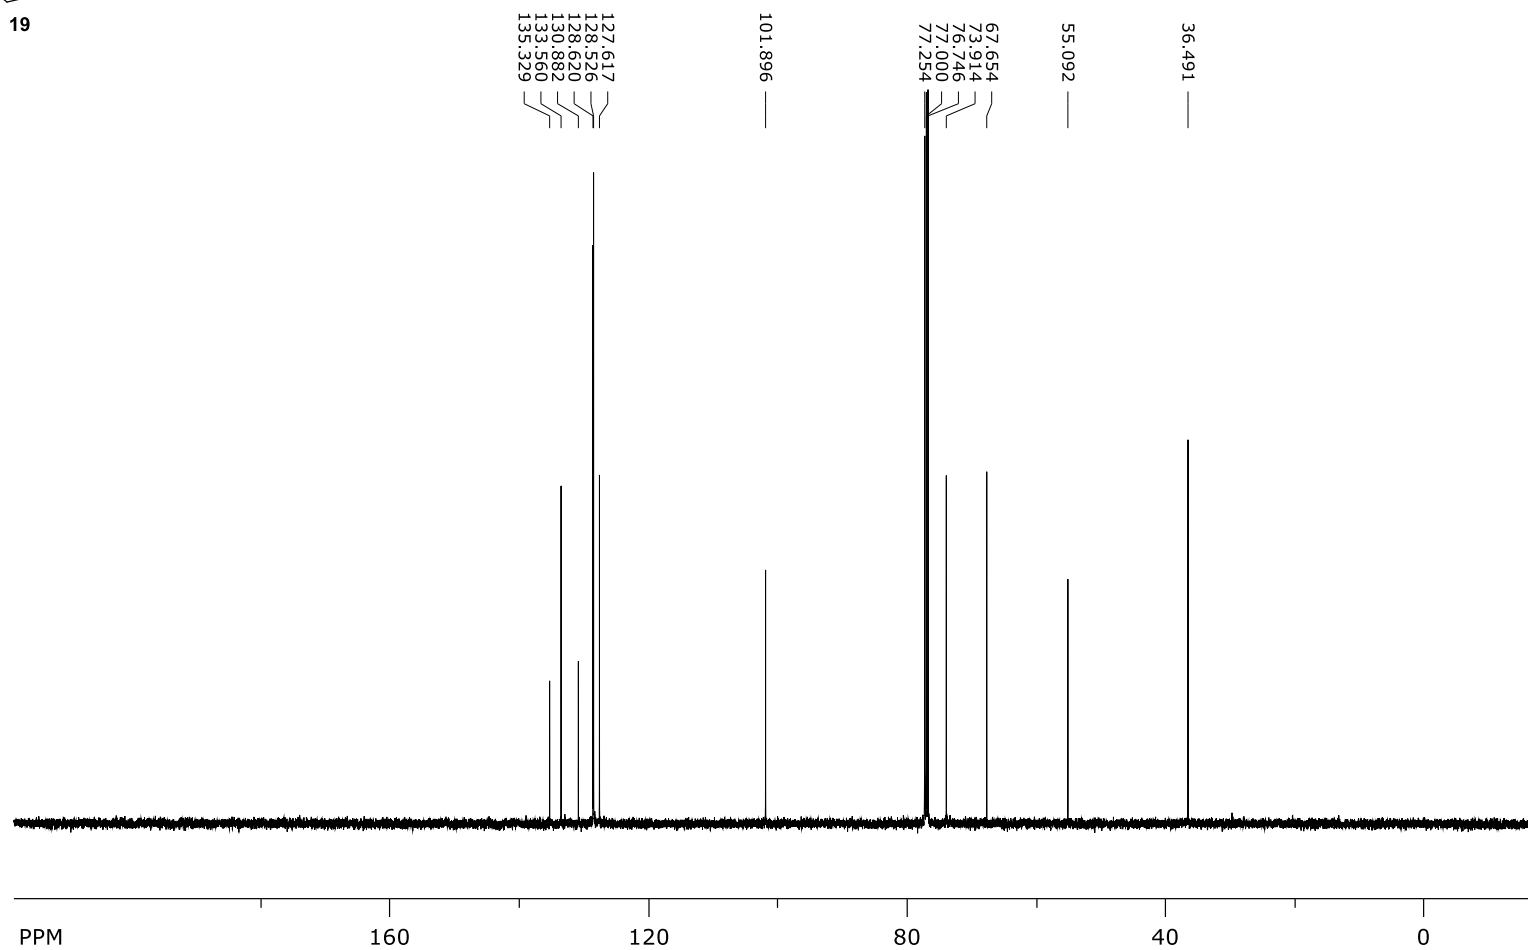

**<sup>1</sup>H NMR of (1*S*,5*R*)-3-(Chloro(phenyl)methyl)-6,8-dioxabicyclo[3.2.1]oct-3-ene (20)**

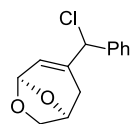

**20** dr 91:9

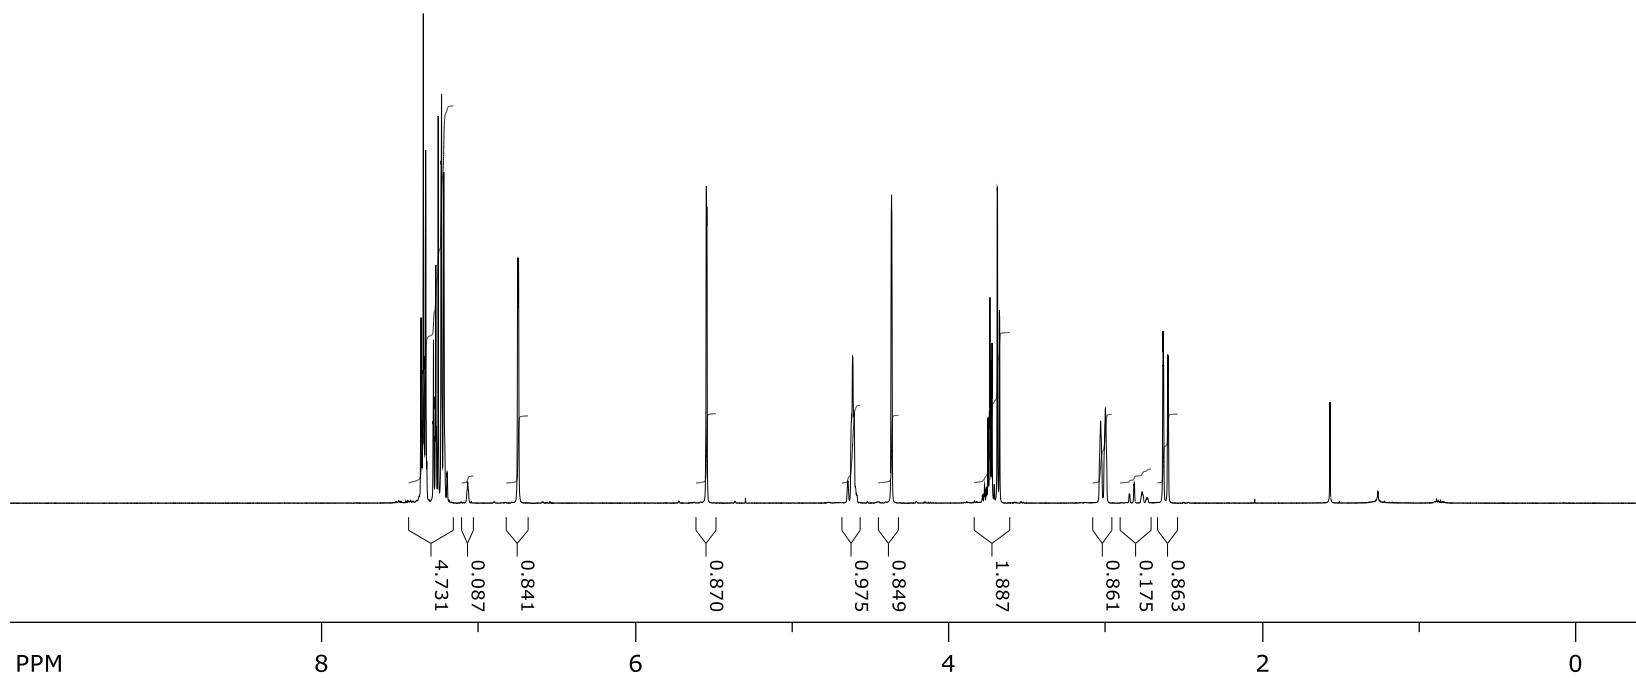

**$^{13}\text{C}\{^1\text{H}\}$  NMR of (1*S*,5*R*)-3-(Chloro(phenyl)methyl)-6,8-dioxabicyclo[3.2.1]oct-3-ene (20)**

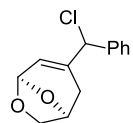

**20** dr 91:9

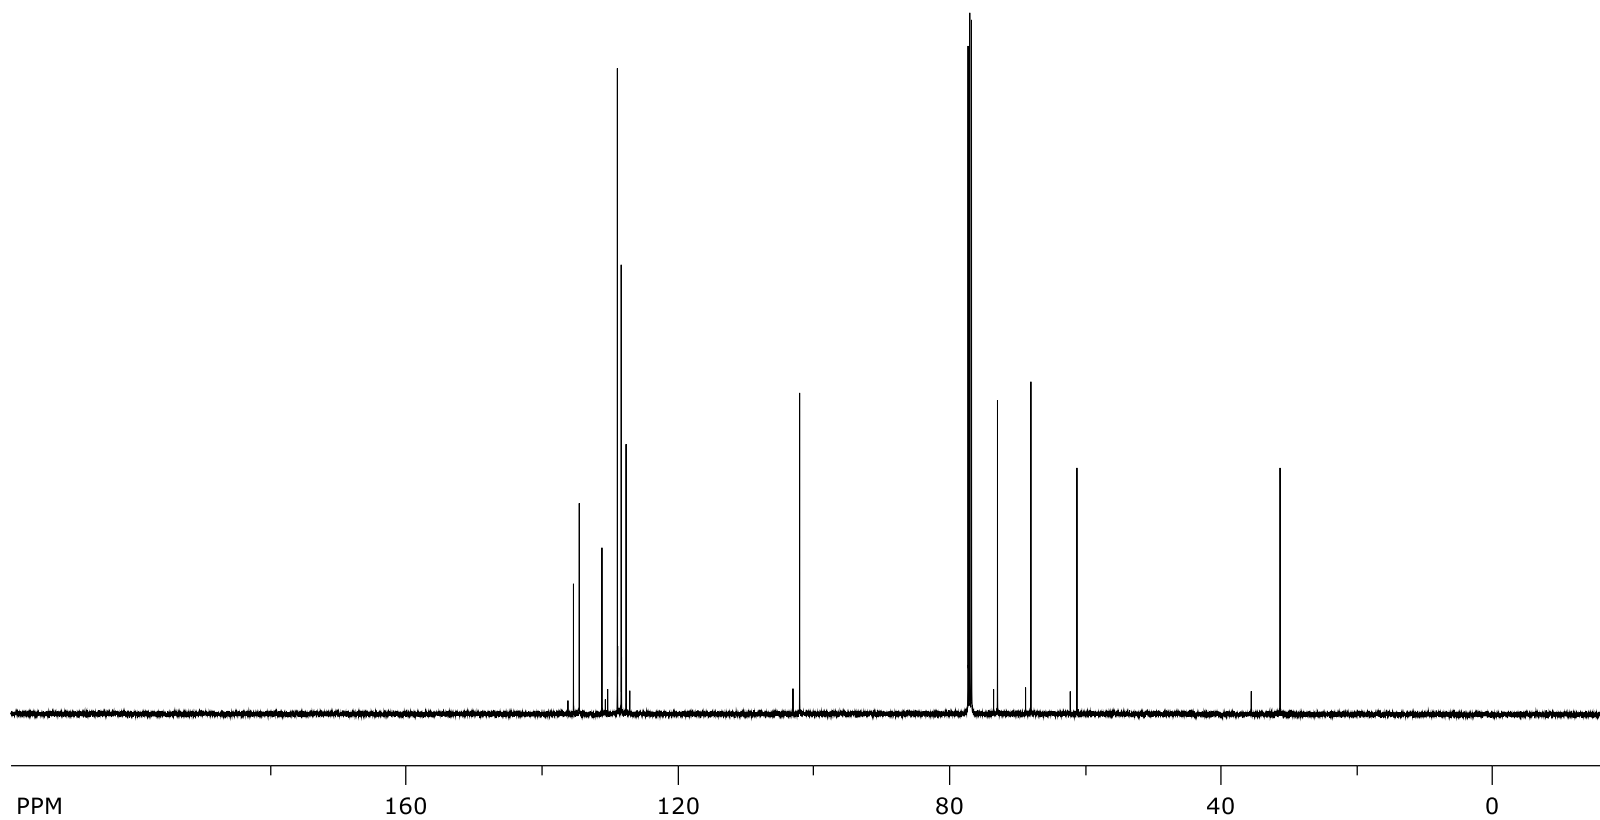

**<sup>1</sup>H NMR of (1*R*,2*R*,5*S*)-2-Allyl-7,7-dibenzyl-3,8-dioxabicyclo[3.2.1]octane (21)**

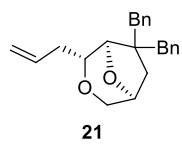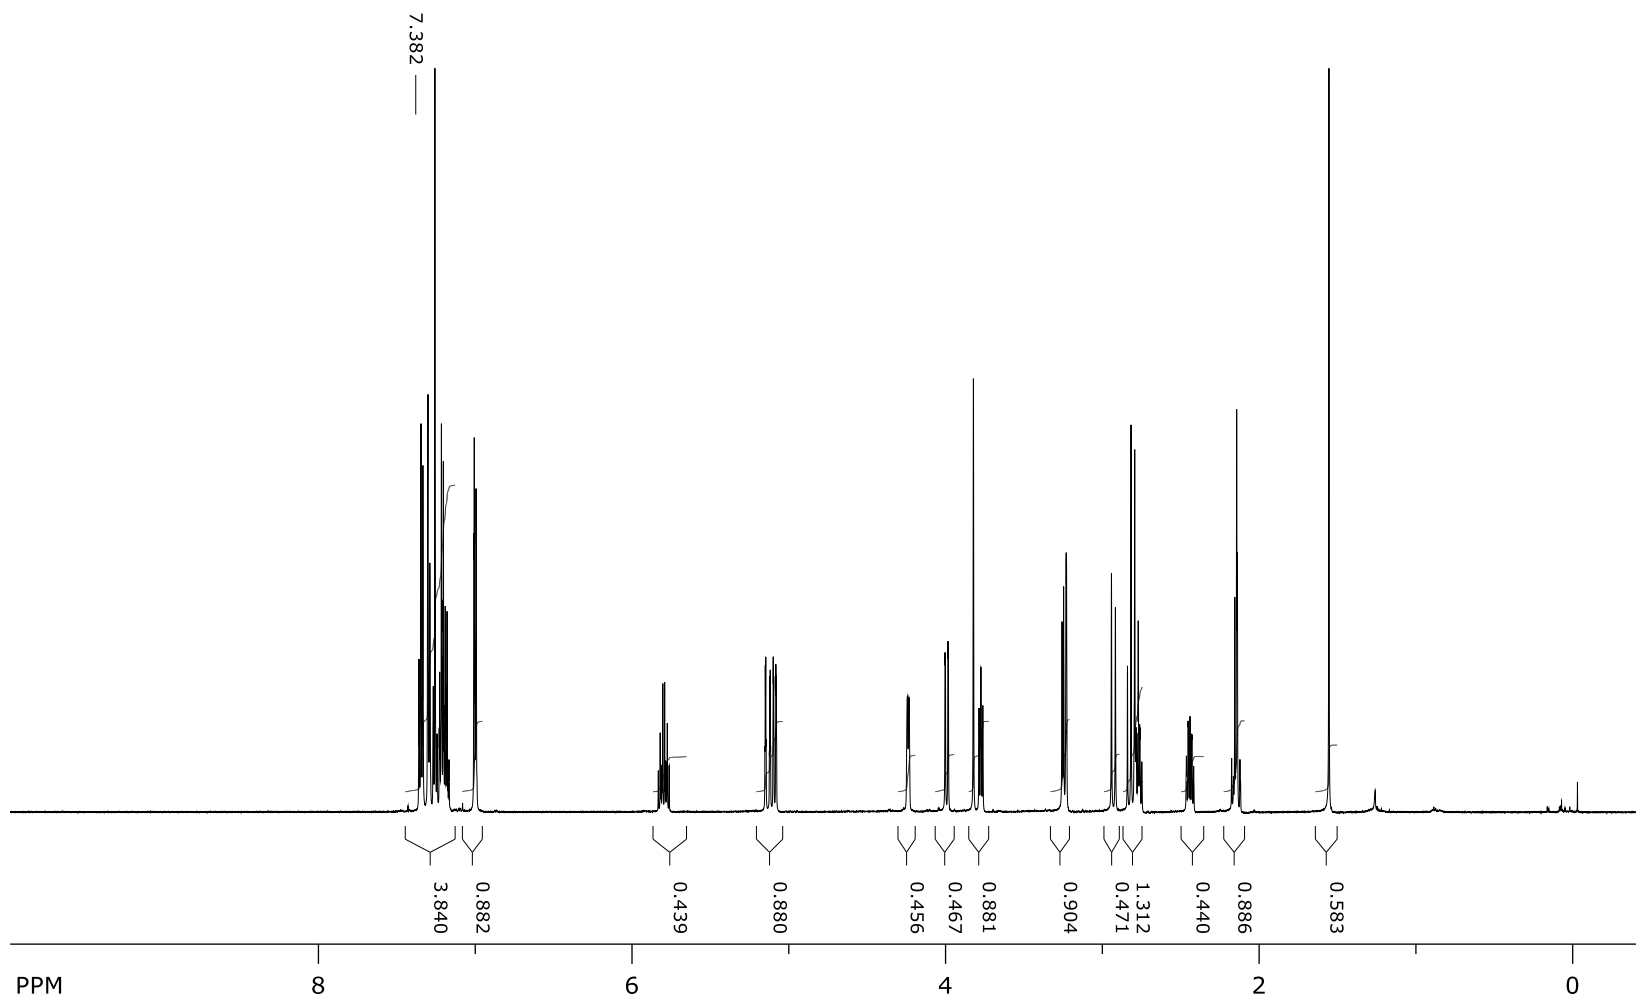

$^{13}\text{C}\{^1\text{H}\}$  NMR of (1*R*,2*R*,5*S*)-2-Allyl-7,7-dibenzyl-3,8-dioxabicyclo[3.2.1]octane (21)

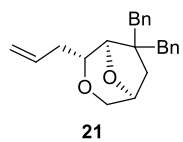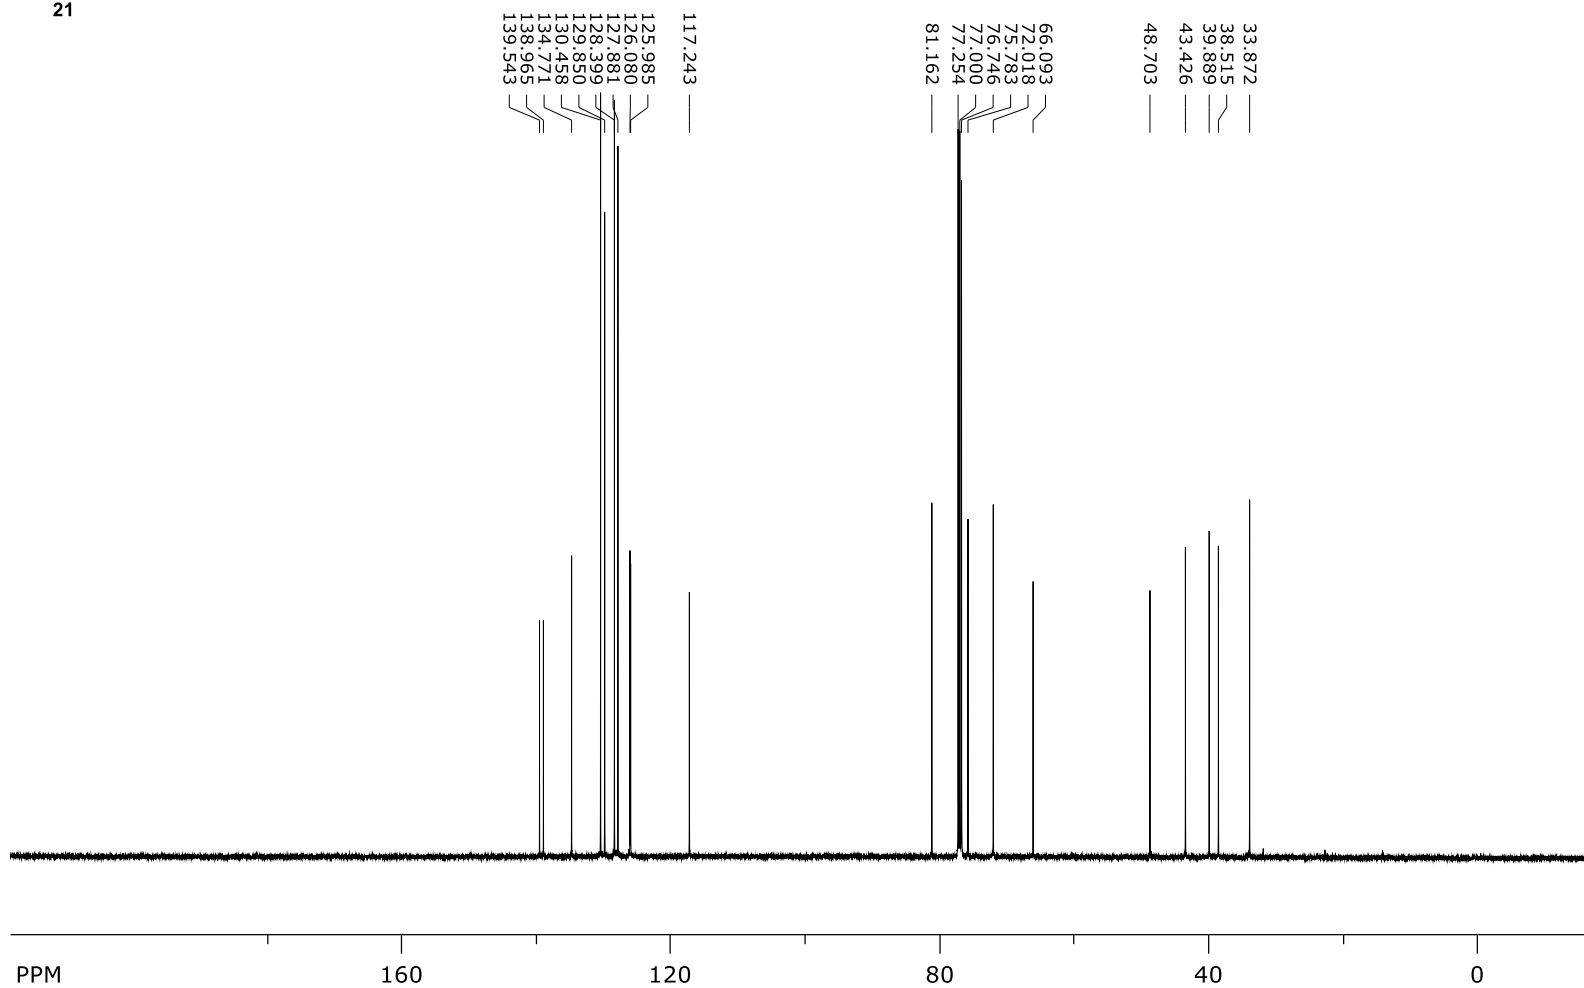



**<sup>1</sup>H NMR of (1*R*,2*R*,5*S*)-7,7-Dibenzyl-2-(4-methoxyphenyl)-3,8-dioxabicyclo[3.2.1]octane (22)**

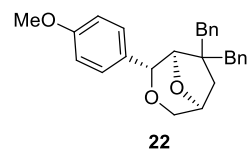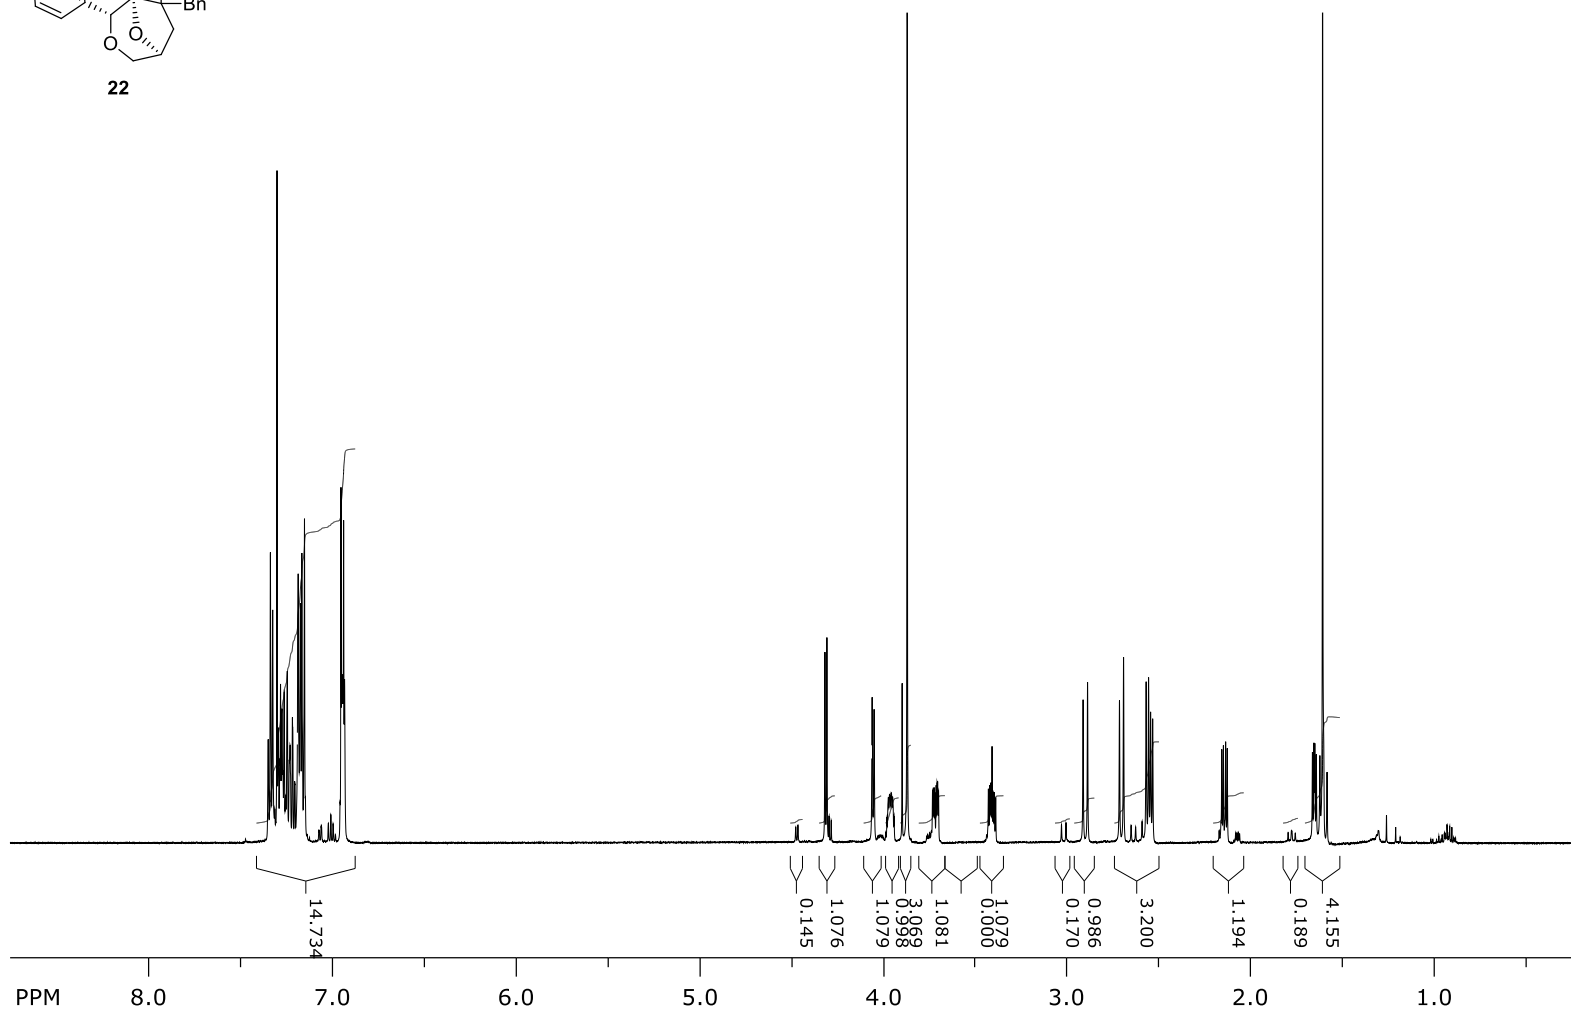

**$^{13}\text{C}\{^1\text{H}\}$  NMR of (1*R*,2*R*,5*S*)-7,7-Dibenzyl-2-(4-methoxyphenyl)-3,8-dioxabicyclo[3.2.1]octane (22)**

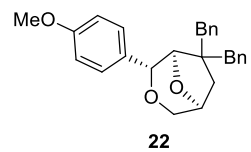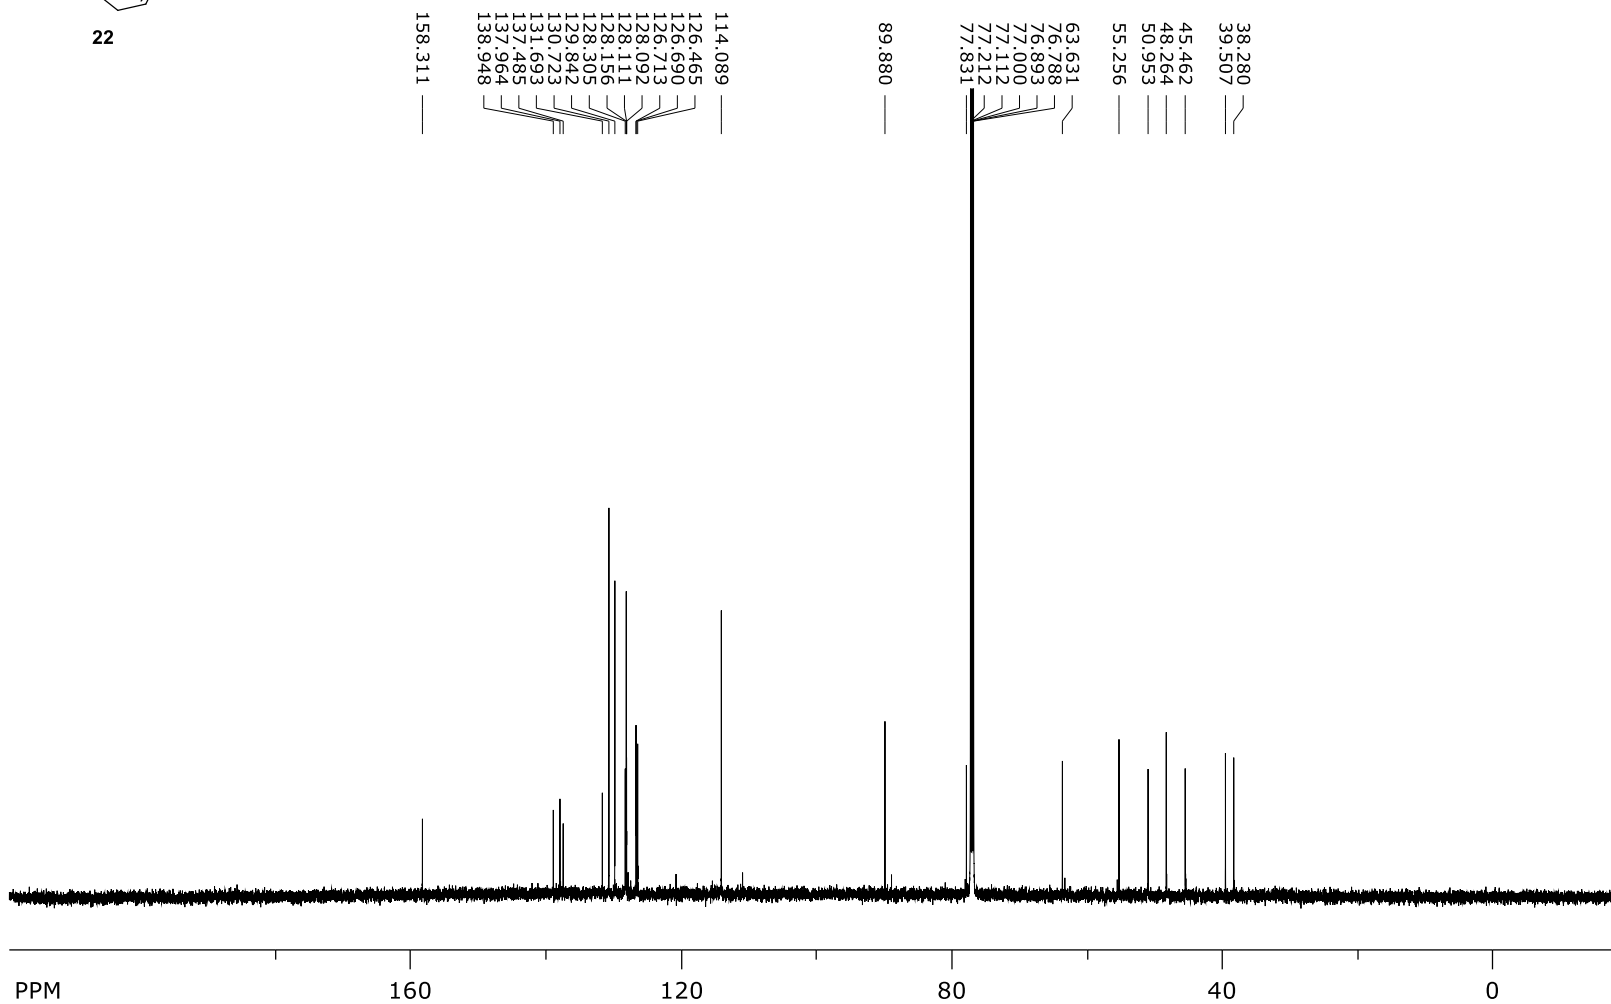

**<sup>1</sup>H NMR of (1*R*,2*R*,5*S*)-7,7-Dibenzyl-2-(4-phenoxyphenyl)-3,8-dioxabicyclo[3.2.1]octane (23)**

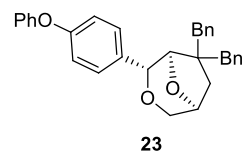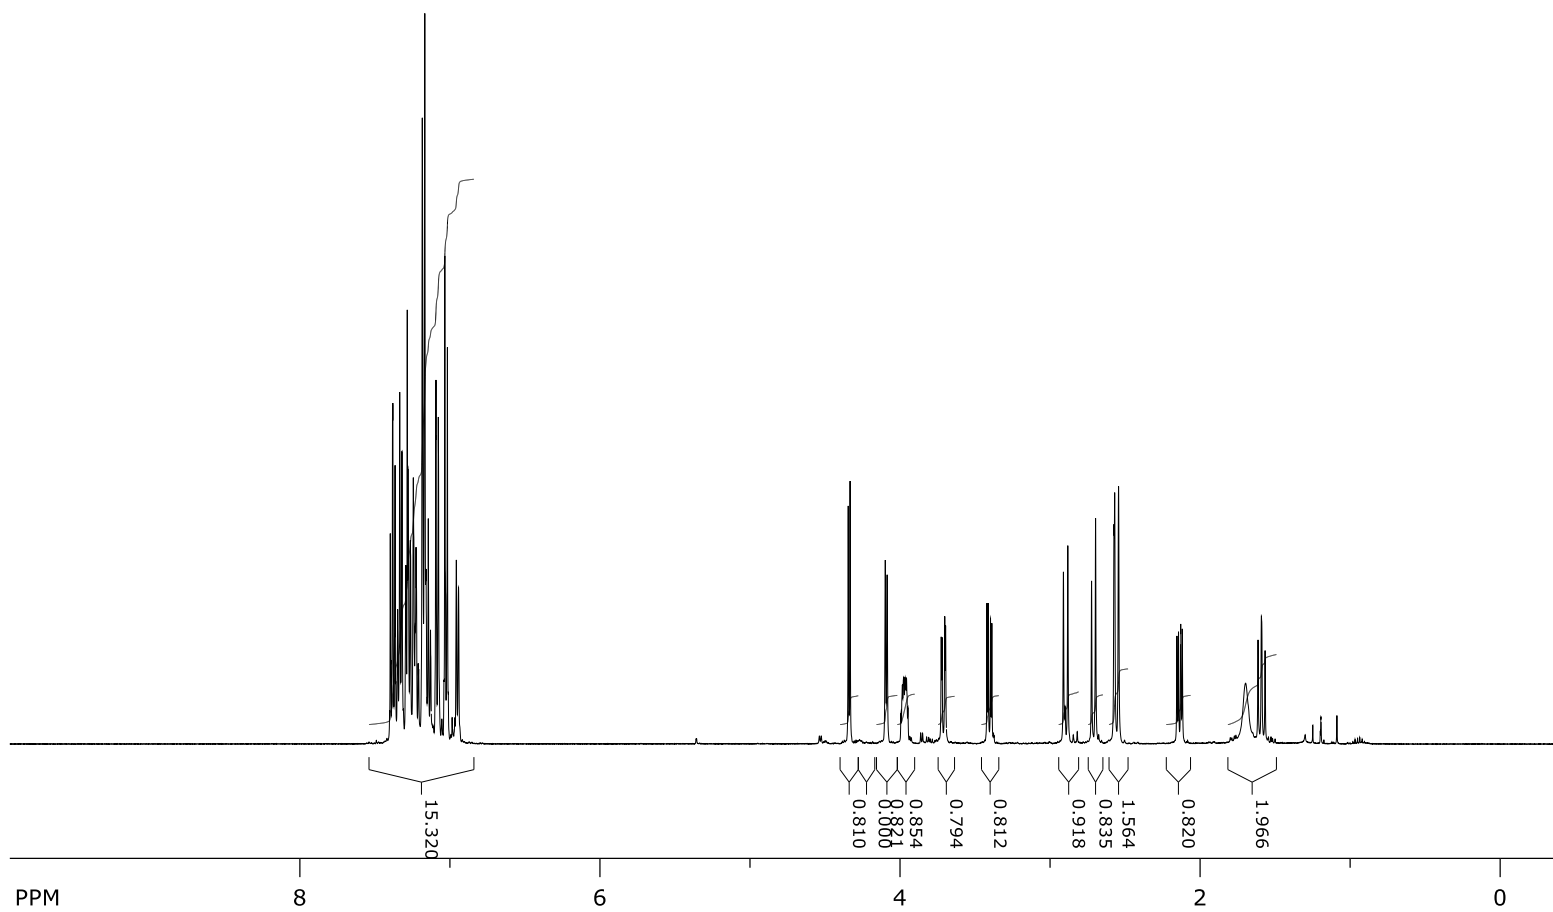

**$^{13}\text{C}\{^1\text{H}\}$  NMR of (1*R*,2*R*,5*S*)-7,7-Dibenzyl-2-(4-phenoxyphenyl)-3,8-dioxabicyclo[3.2.1]octane (23)**

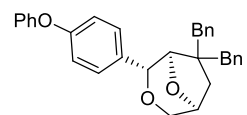

**23**

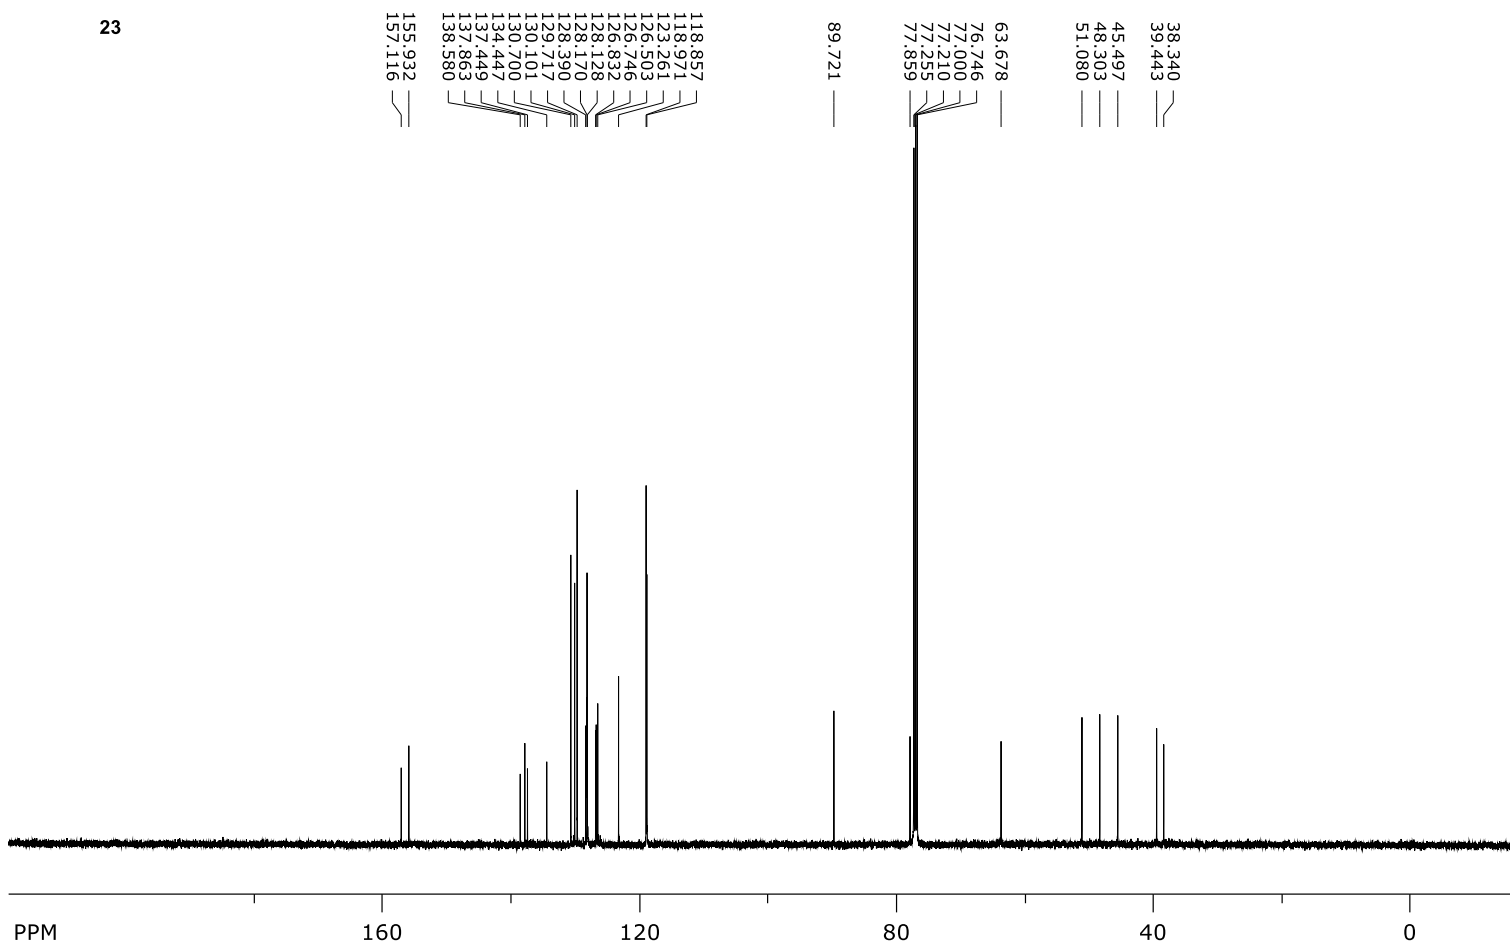

**$^1\text{H}$  NMR of (1*R*,5*S*)-7,7-Dibenzyl-3,8-dioxabicyclo[3.2.1]octan-2-one (24)**

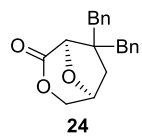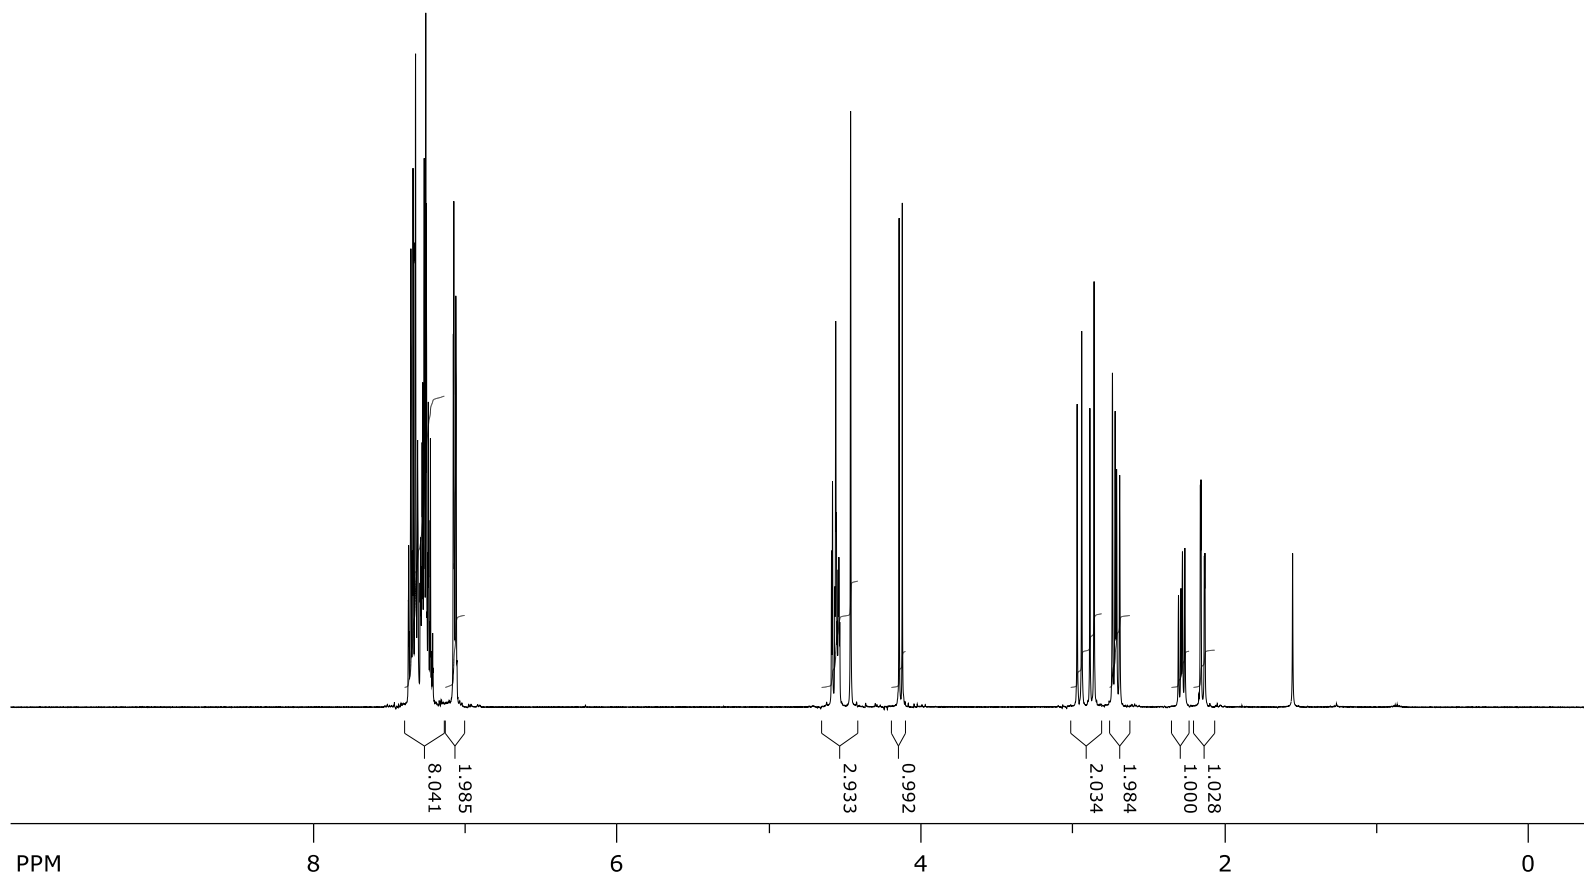

$^{13}\text{C}\{^1\text{H}\}$  NMR of (1*R*,5*S*)-7,7-Dibenzyl-3,8-dioxabicyclo[3.2.1]octan-2-one (24)

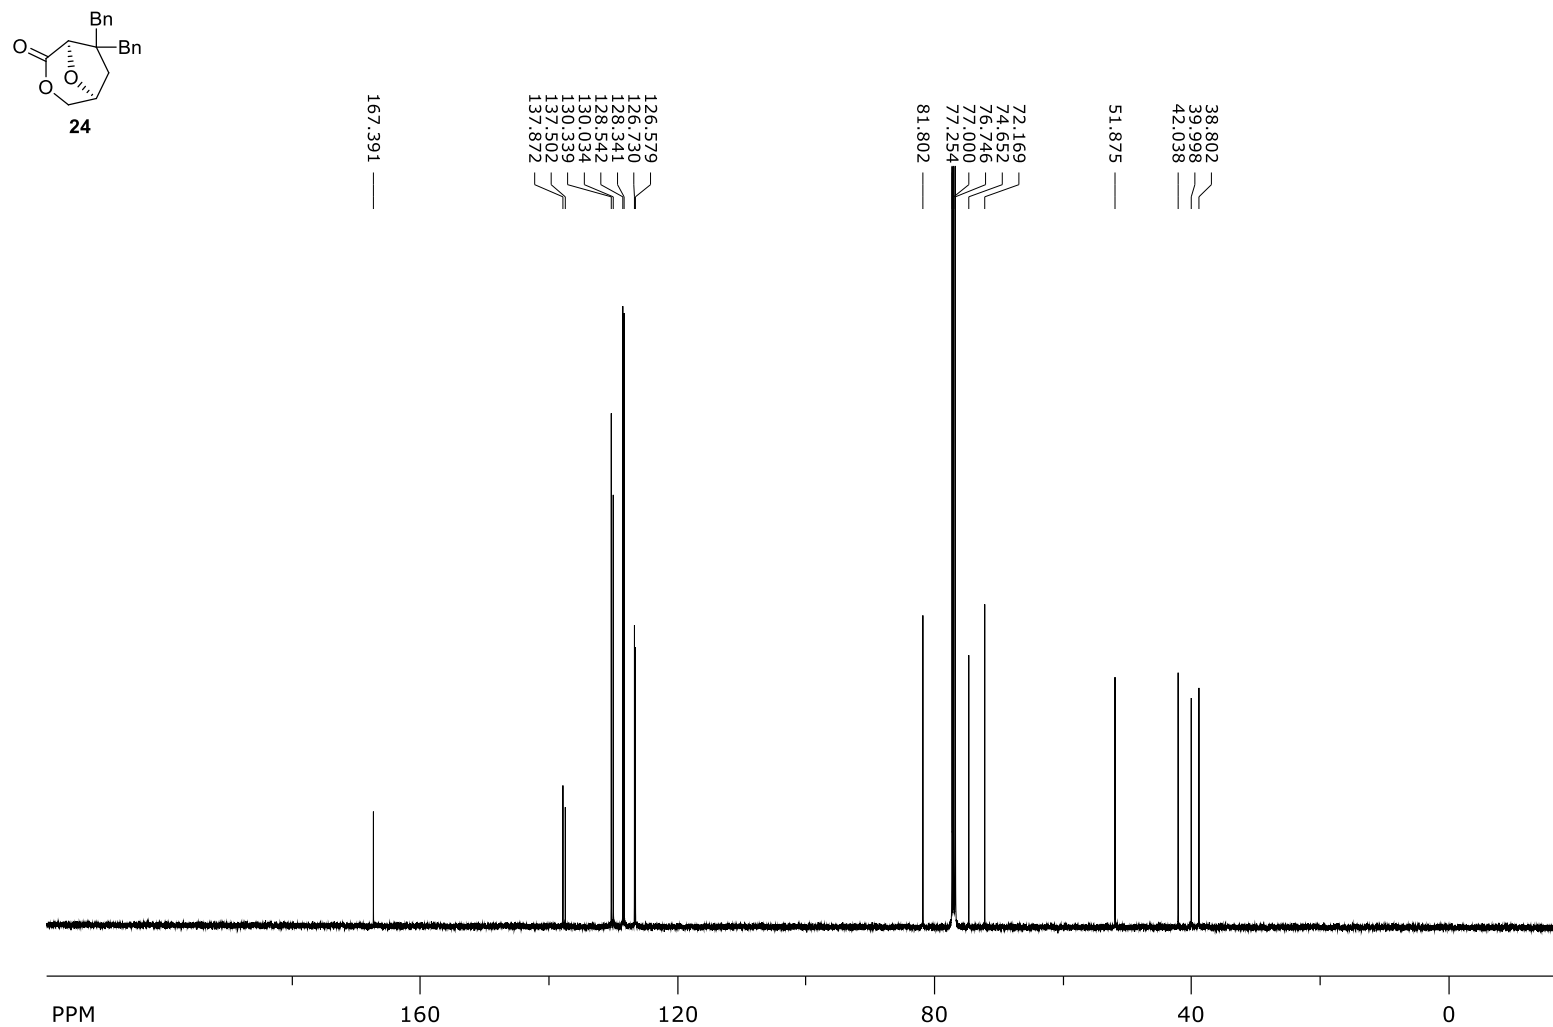

## References

1. Klepp, J.; Sumby, C. J.; Greatrex, B. W. *Synlett* **2018**, 29 (11), 1441–1446.
2. Pedersen, J. M.; Pedersen, C. M. *Angew. Chem.* **2021**, 60 (5), 2689–2693
3. Matsumoto, M.; Ishikawa, H.; Soya, Y.; Ozawa, T. *Heterocycles* **1994**, 38 (11), 2377.
4. CrysAlisPro 1.171.42.54a (Rigaku Oxford Diffraction, 2022).
5. (a) G. M. Sheldrick, A short history of SHELX. *Acta Cryst.*, **2008**, A64, 112–122. (b) G. M. Sheldrick, SHELXT - Integrated space-group and crystal-structure determination. *Acta Cryst.*, **2015**, A71, 3–8.
6. G. M. Sheldrick, Crystal structure refinement with SHELXL. *Acta Cryst.*, **2015**, C71, 3–8.
7. L. J. Barbour, X-Seed 4: updates to a program for small-molecule supramolecular crystallography. *J. Appl. Cryst.*, **2020**, 53, 1141–1146.
8. O. V. Dolomanov, L. J. Bourhis, R. J. Gildea, J. A. K. Howard and H. Puschmann, OLEX2: a complete structure solution, refinement and analysis program. *J. Appl. Cryst.*, **2009**, 42, 339–341.
