# Supplementary material for: Skeletal rearrangement of 6,8-dioxabicyclo[3.2.1]octan-4-ols promoted by thionyl chloride or Appel conditions
Source: publisher site journal article supplement (doi:10.3762/bjoc.20.74), 2024-04-16

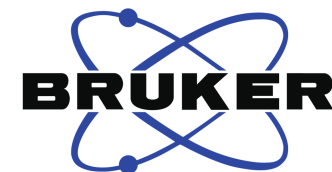

Current Data Parameters  
NAME 4OMe-alcohol  
EXPNO 2  
PROCNO 1

F2 - Acquisition Parameters  
Date\_ 20230908  
Time 19.51 h  
INSTRUM spect  
PROBHD Z124627\_0019 (  
PULPROG zgpg30  
TD 65536  
SOLVENT CDCl3  
NS 1024  
DS 4  
SWH 29761.904 Hz  
FIDRES 0.908261 Hz  
AQ 1.1010048 sec  
RG 191.36  
DW 16.800 usec  
DE 6.50 usec  
TE 298.0 K  
D1 2.00000000 sec  
D11 0.03000000 sec  
TD0 1  
SFO1 125.7779086 MHz  
NUC1 13C  
P0 3.33 usec  
P1 10.00 usec  
PLW1 41.00000000 W  
SFO2 500.1620006 MHz  
NUC2 1H  
CPDPRG[2] waltz65  
PCPD2 80.00 usec  
PLW2 11.00000000 W  
PLW12 0.37393999 W  
PLW13 0.18809000 W

F2 - Processing parameters  
SI 32768  
SF 125.7653320 MHz  
WDW EM  
SSB 0  
LB 1.00 Hz  
GB 0  
PC 1.40

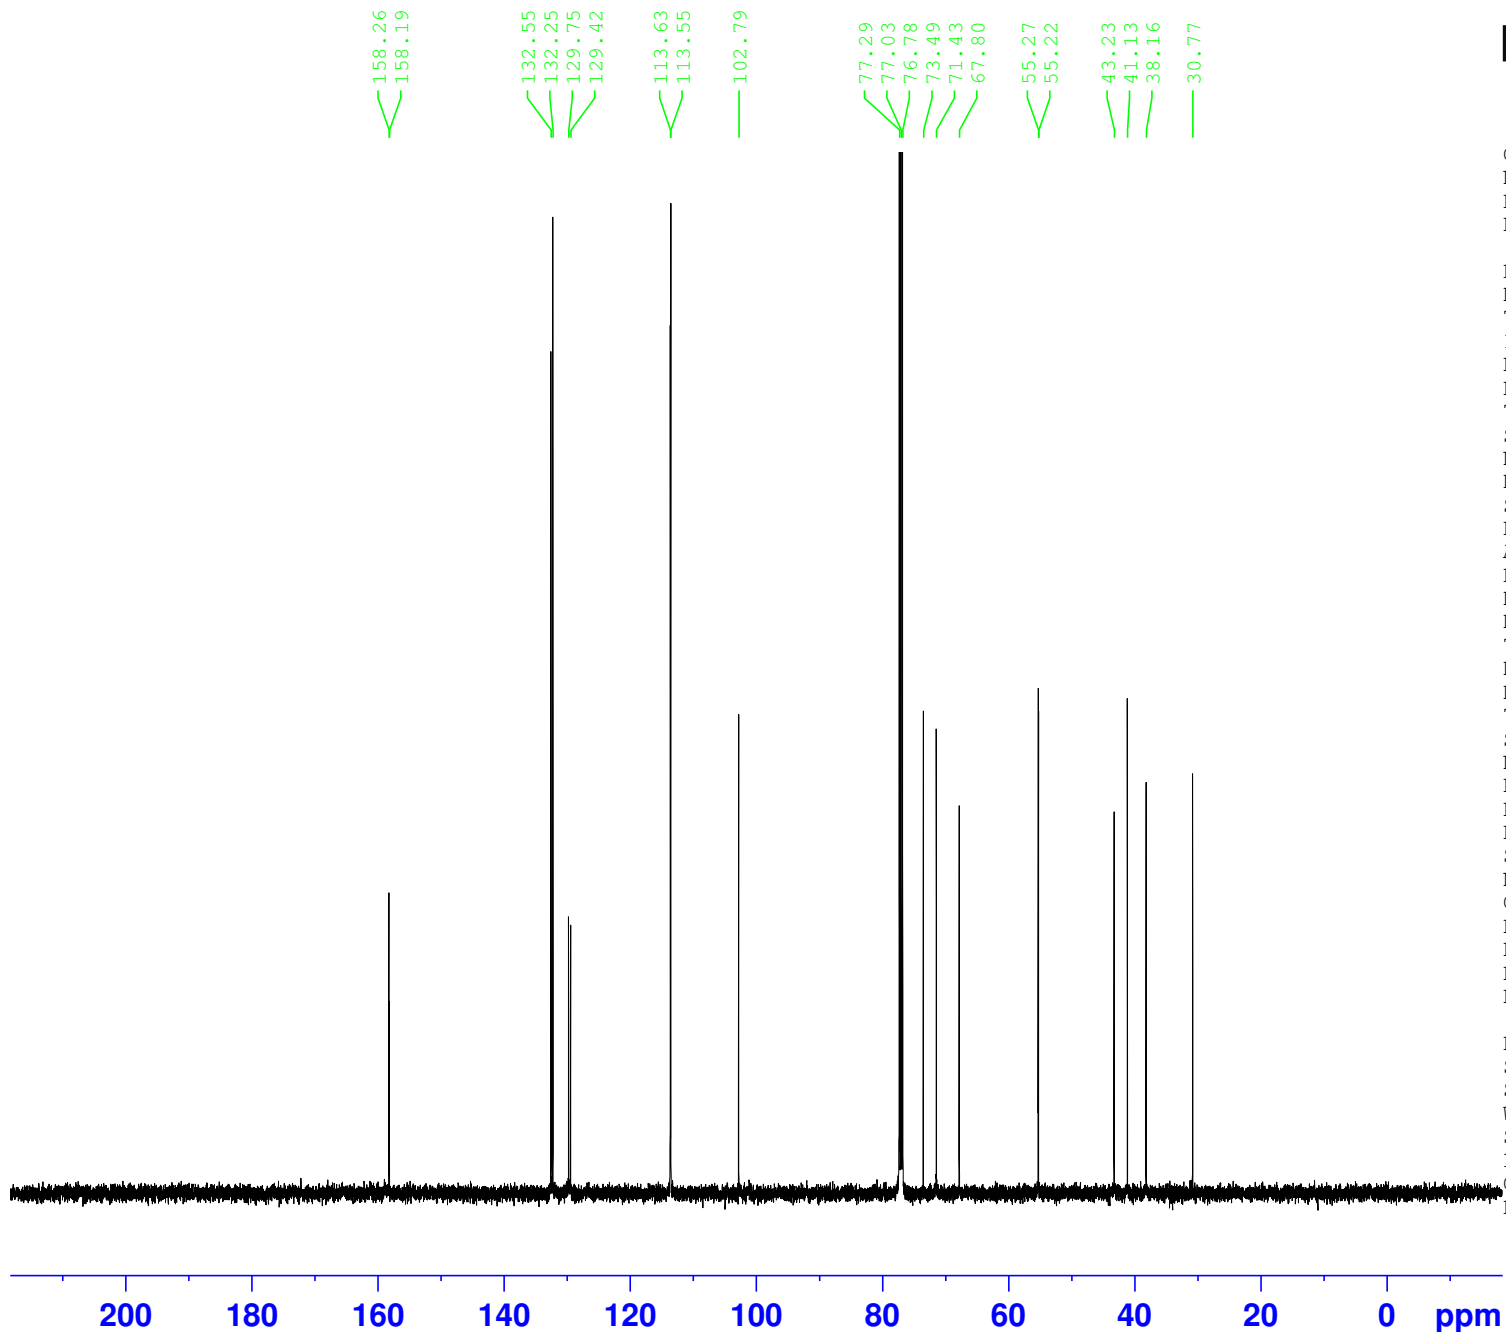

Supplement: Additional file 2 [file 4OMe-alcohol_2_1.pdf › NMR files oxygen migration/10f/13C/pdata/1/4OMe-alcohol_2_1.pdf]
