# Supplementary material for: Skeletal rearrangement of 6,8-dioxabicyclo[3.2.1]octan-4-ols promoted by thionyl chloride or Appel conditions
Source: publisher site journal article supplement (doi:10.3762/bjoc.20.74), 2024-04-16
Supplement: Additional file 2 [file 9f HRMS.pdf › NMR files oxygen migration/9f/9f HRMS.pdf]

Single Mass Analysis

Tolerance = 5.0 PPM / DBE: min = -1.5, max = 120.0  
Element prediction: Off  
Number of isotope peaks used for i-FIT = 3

Monoisotopic Mass, Even Electron Ions  
10 formula(e) evaluated with 1 results within limits (up to 20 closest results for each mass)  
Elements Used:  
C: 0-22 H: 0-26 O: 0-5 Na: 0-1  
HBr7  
UNE BGreatrex HBr7 40 (0.974) Cm (38:58)

1: TOF MS ES+  
2.43e+004

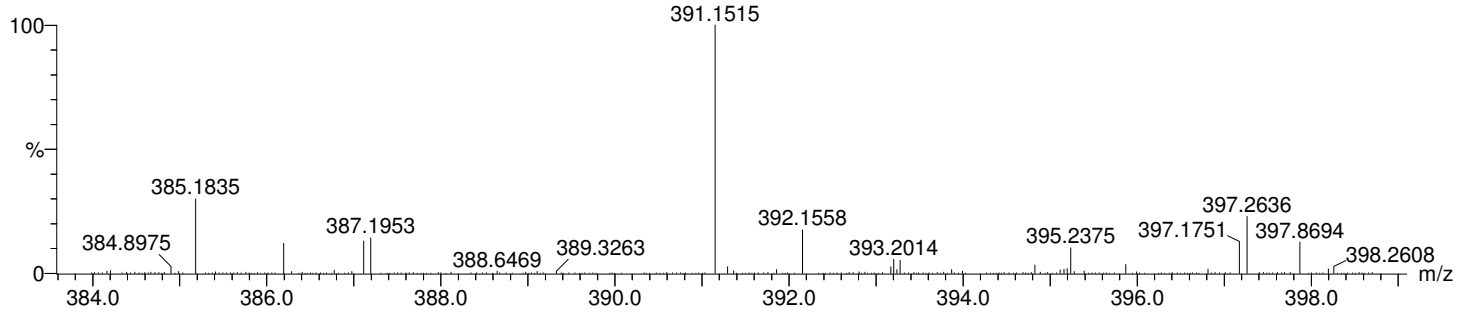

Minimum: -1.5  
Maximum: 55.0 5.0 120.0

| Mass     | Calc. Mass | mDa  | PPM  | DBE  | i-FIT | i-FIT (Norm) | Formula       |
|----------|------------|------|------|------|-------|--------------|---------------|
| 391.1515 | 391.1521   | -0.6 | -1.5 | 10.5 | 335.5 | 0.0          | C22 H24 O5 Na |
