# Supplementary material for: Skeletal rearrangement of 6,8-dioxabicyclo[3.2.1]octan-4-ols promoted by thionyl chloride or Appel conditions
Source: publisher site journal article supplement (doi:10.3762/bjoc.20.74), 2024-04-16
Supplement: Additional file 2 [file 10e HRMS.pdf › NMR files oxygen migration/10e/10e HRMS.pdf]

Single Mass Analysis

Tolerance = 5.0 PPM / DBE: min = -1.5, max = 120.0

Element prediction: Off

Number of isotope peaks used for i-FIT = 3

Monoisotopic Mass, Even Electron Ions

16 formula(e) evaluated with 1 results within limits (up to 20 closest results for each mass)

Elements Used:

C: 0-20 H: 0-22 O: 0-3 Na: 0-1

HBr5

UNE BGreatrex HBr5 18 (0.442) Cm (16:37)

1: TOF MS ES+  
7.41e+003

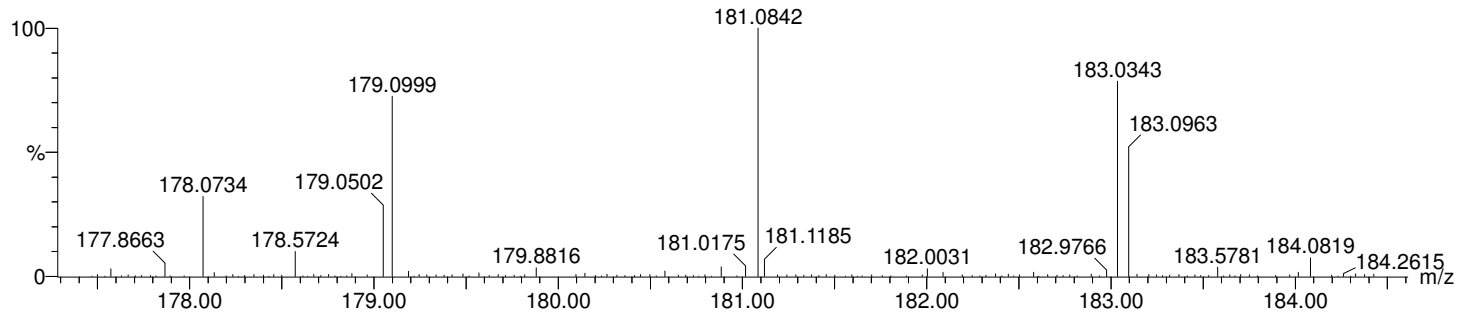

Minimum: -1.5  
Maximum: 55.0 5.0 120.0

| Mass     | Calc. Mass | mDa | PPM | DBE | i-FIT | i-FIT (Norm) | Formula      |
|----------|------------|-----|-----|-----|-------|--------------|--------------|
| 181.0842 | 181.0841   | 0.1 | 0.6 | 1.5 | 376.2 | 0.0          | C8 H14 O3 Na |
