# Supplementary material for: Skeletal rearrangement of 6,8-dioxabicyclo[3.2.1]octan-4-ols promoted by thionyl chloride or Appel conditions
Source: publisher site journal article supplement (doi:10.3762/bjoc.20.74), 2024-04-16
Supplement: Additional file 2 [file 10f HRMS.pdf › NMR files oxygen migration/10f/10f HRMS.pdf]

Single Mass Analysis

Tolerance = 5.0 PPM / DBE: min = -1.5, max = 120.0

Element prediction: Off

Number of isotope peaks used for i-FIT = 3

Monoisotopic Mass, Odd and Even Electron Ions

10 formula(e) evaluated with 1 results within limits (up to 20 closest results for each mass)

Elements Used:

C: 0-22 H: 0-26 O: 0-5 Na: 0-1

HBr9

UNE BGreatrex HBr9 208 (4.941) Cm (192:212)

1: TOF MS ES+  
2.52e+004

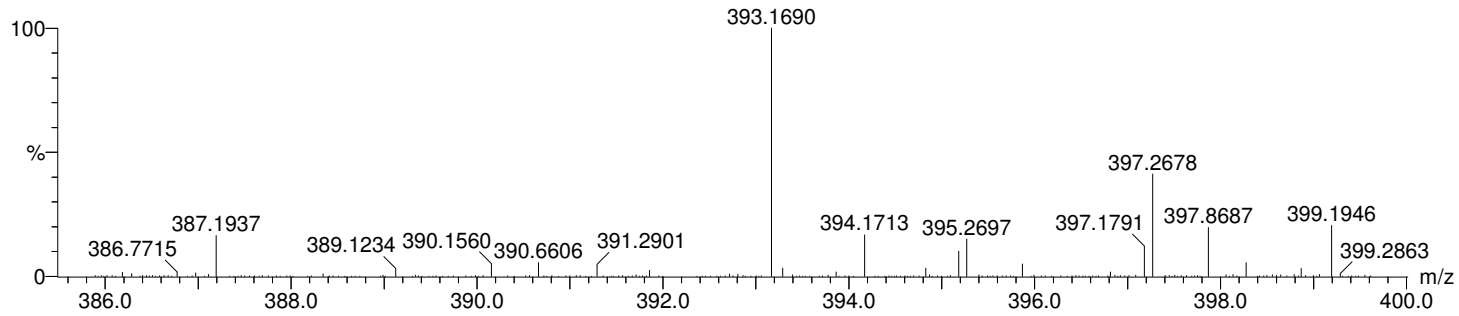

Minimum: -1.5  
Maximum: 55.0 5.0 120.0

| Mass     | Calc. Mass | mDa | PPM | DBE | i-FIT | i-FIT (Norm) | Formula       |
|----------|------------|-----|-----|-----|-------|--------------|---------------|
| 393.1690 | 393.1678   | 1.2 | 3.1 | 9.5 | 314.7 | 0.0          | C22 H26 O5 Na |
