# Supplementary material for: Skeletal rearrangement of 6,8-dioxabicyclo[3.2.1]octan-4-ols promoted by thionyl chloride or Appel conditions
Source: publisher site journal article supplement (doi:10.3762/bjoc.20.74), 2024-04-16
Supplement: Additional file 2 [file 12a HRMS.pdf › NMR files oxygen migration/12a/12a HRMS.pdf]

Single Mass Analysis

Tolerance = 5.0 PPM / DBE: min = -1.5, max = 120.0  
Element prediction: Off  
Number of isotope peaks used for i-FIT = 3

Monoisotopic Mass, Even Electron Ions  
6 formula(e) evaluated with 1 results within limits (all results (up to 1000) for each mass)  
Elements Used:  
C: 8-20 H: 5-22 O: 0-3 Na: 0-1  
CyrBn2ROH  
UNE BGreatrex CyrBn2ROH 103 (2.462) Cm (103:132)

1: TOF MS ES+  
9.74e+003

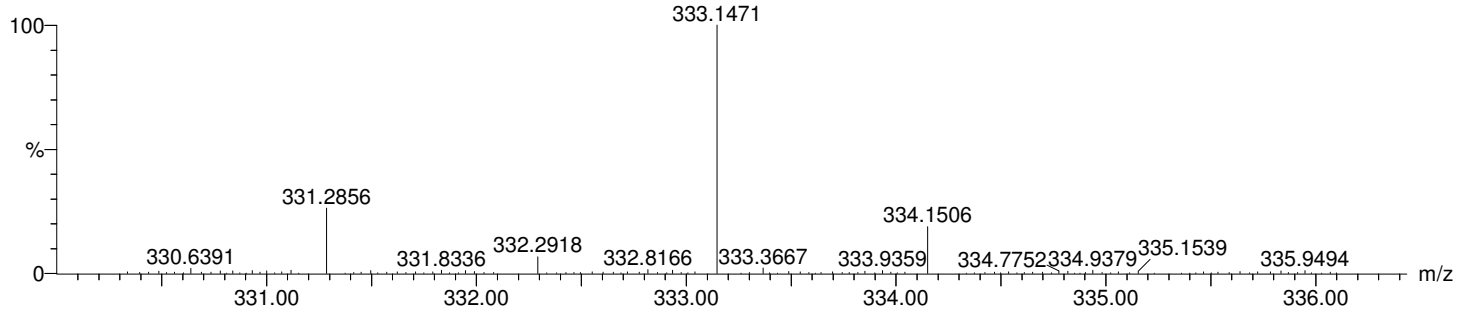

Minimum: -1.5  
Maximum: 55.0 5.0 120.0

| Mass     | Calc. Mass | mDa | PPM | DBE | i-FIT | i-FIT (Norm) | Formula |     |    |    |
|----------|------------|-----|-----|-----|-------|--------------|---------|-----|----|----|
| 333.1471 | 333.1467   | 0.4 | 1.2 | 9.5 | 326.9 | 0.0          | C20     | H22 | O3 | Na |
