# Supplementary material for: Skeletal rearrangement of 6,8-dioxabicyclo[3.2.1]octan-4-ols promoted by thionyl chloride or Appel conditions
Source: publisher site journal article supplement (doi:10.3762/bjoc.20.74), 2024-04-16
Supplement: Additional file 2 [file 12d HRMS.pdf › NMR files oxygen migration/12d/12d HRMS.pdf]

Single Mass Analysis

Tolerance = 5.0 PPM / DBE: min = -1.5, max = 120.0

Element prediction: Off

Number of isotope peaks used for i-FIT = 3

Monoisotopic Mass, Even Electron Ions

12 formula(e) evaluated with 1 results within limits (all results (up to 1000) for each mass)

Elements Used:

C: 8-20 H: 5-20 O: 0-3 Na: 0-1

CyroxROH

UNE BGreatrex CyroxROH 79 (1.895) Cm (71:79)

1: TOF MS ES+  
2.81e+003

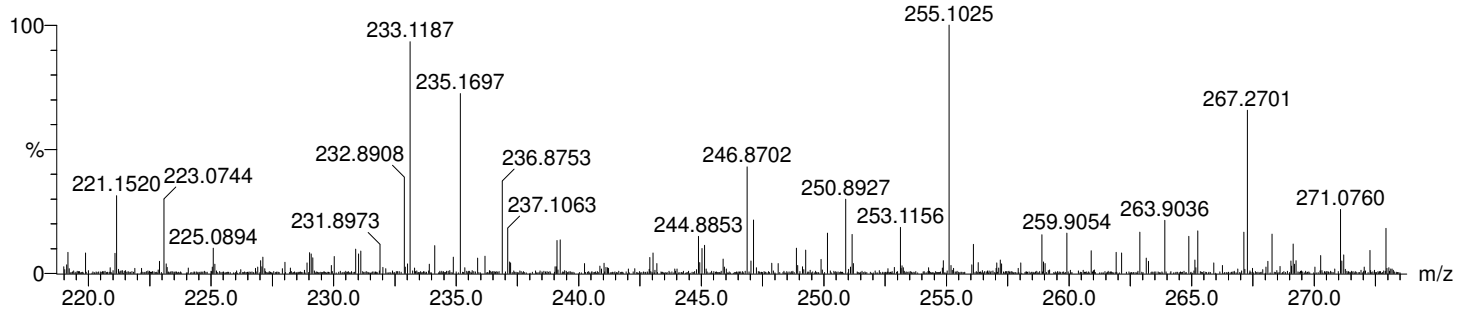

Minimum: -1.5  
Maximum: 55.0 5.0 120.0

| Mass     | Calc. Mass | mDa | PPM | DBE | i-FIT | i-FIT (Norm) | Formula    |
|----------|------------|-----|-----|-----|-------|--------------|------------|
| 233.1187 | 233.1178   | 0.9 | 3.9 | 6.5 | 251.9 | 0.0          | C14 H17 O3 |
