# Supplementary material for: Skeletal rearrangement of 6,8-dioxabicyclo[3.2.1]octan-4-ols promoted by thionyl chloride or Appel conditions
Source: publisher site journal article supplement (doi:10.3762/bjoc.20.74), 2024-04-16
Supplement: Additional file 2 [file 12f HRMS.pdf › NMR files oxygen migration/12f/12f HRMS.pdf]

Single Mass Analysis

Tolerance = 5.0 PPM / DBE: min = -1.5, max = 120.0  
Element prediction: Off  
Number of isotope peaks used for i-FIT = 3

Monoisotopic Mass, Even Electron Ions  
10 formula(e) evaluated with 1 results within limits (all results (up to 1000) for each mass)  
Elements Used:  
C: 6-22 H: 5-26 O: 0-5 Na: 0-1  
Cyr40MePh2ROH  
UNE BGreatrex Cyr40MePh2ROH 49 (1.187) Cm (48:73)

1: TOF MS ES+  
1.03e+004

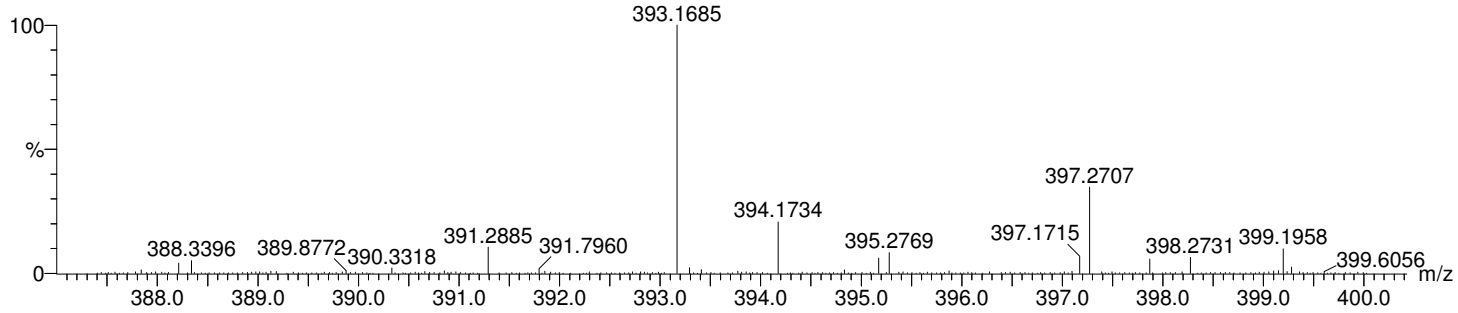

Minimum: -1.5  
Maximum: 55.0 5.0 120.0

| Mass     | Calc. Mass | mDa | PPM | DBE | i-FIT | i-FIT (Norm) | Formula |     |    |    |
|----------|------------|-----|-----|-----|-------|--------------|---------|-----|----|----|
| 393.1685 | 393.1678   | 0.7 | 1.8 | 9.5 | 315.5 | 0.0          | C22     | H26 | O5 | Na |
