# Supplementary material for: Skeletal rearrangement of 6,8-dioxabicyclo[3.2.1]octan-4-ols promoted by thionyl chloride or Appel conditions
Source: publisher site journal article supplement (doi:10.3762/bjoc.20.74), 2024-04-16
Supplement: Additional file 2 [file 13b HRMS.pdf › NMR files oxygen migration/13b/13b HRMS.pdf]

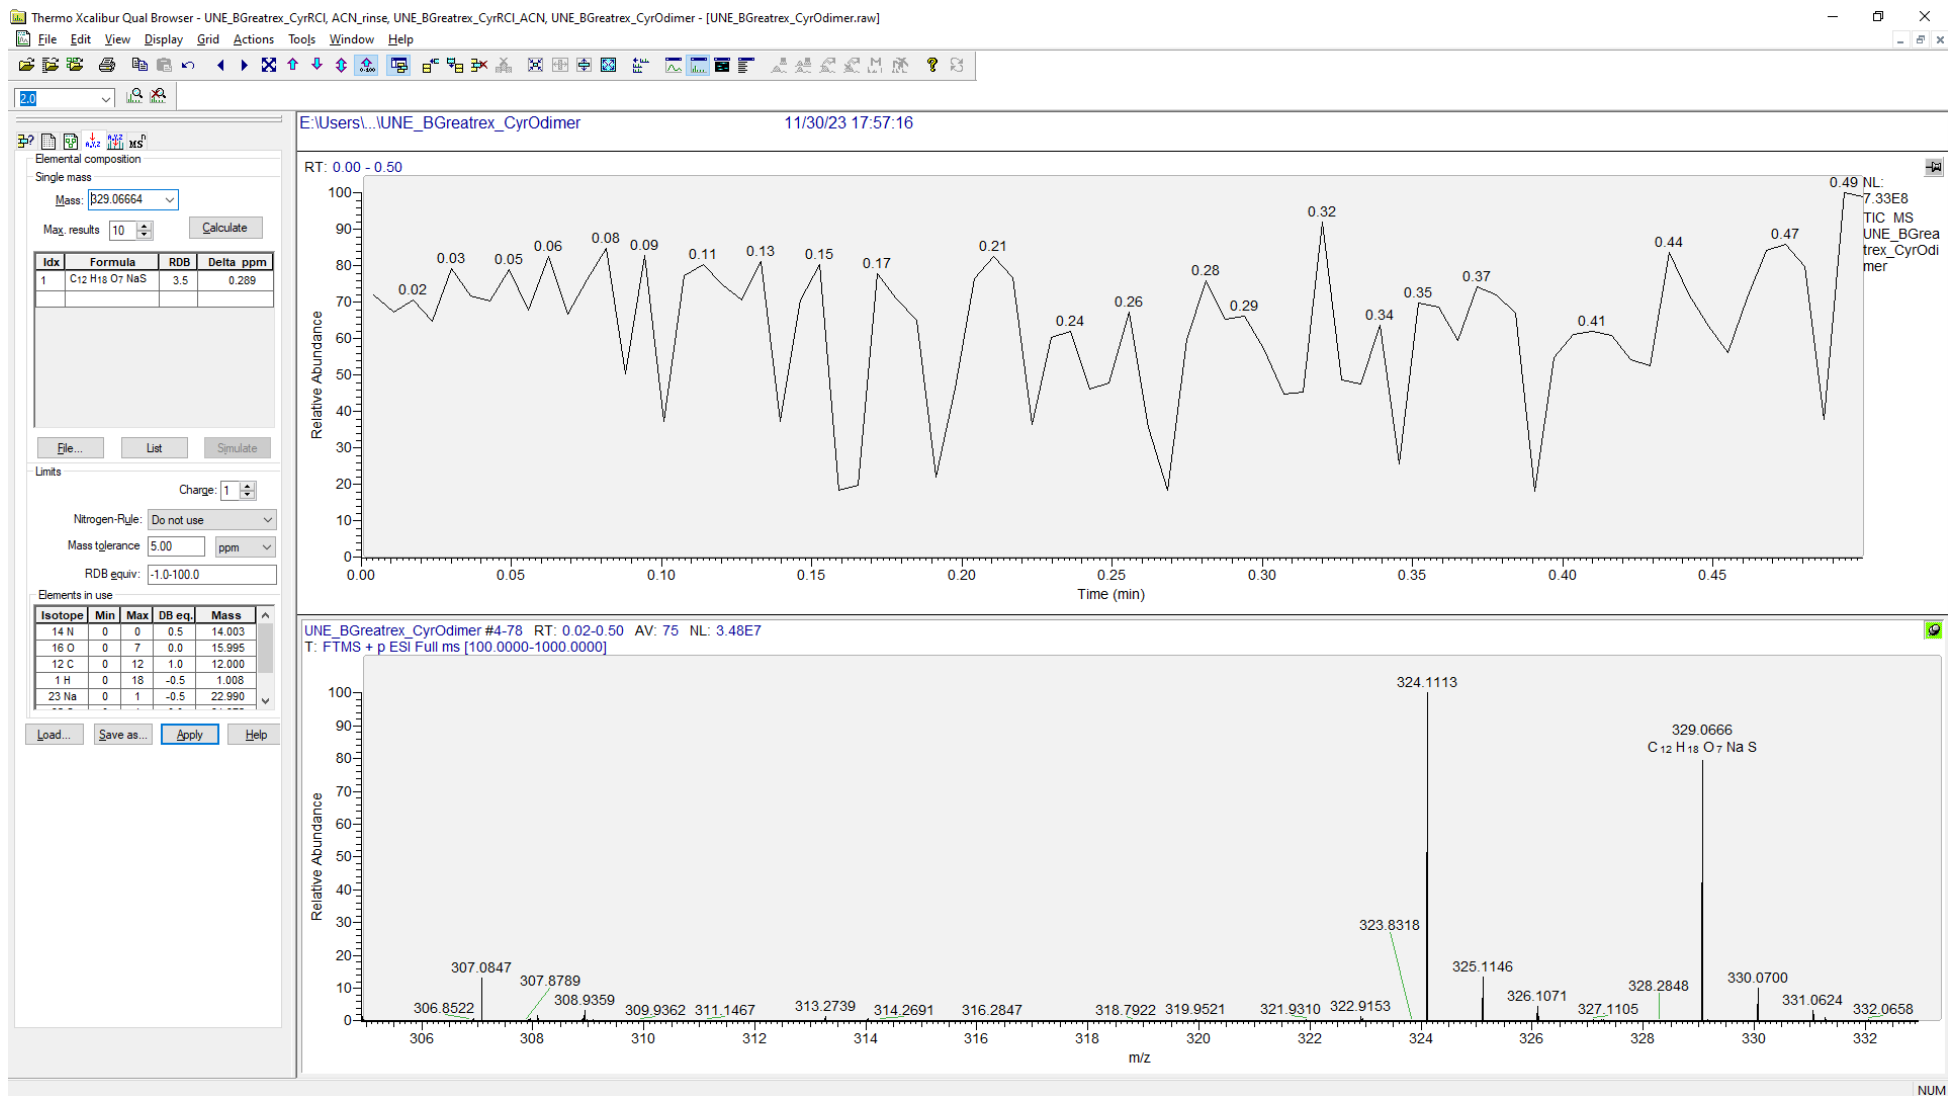

Elemental composition search on mass 329.07

m/z= 324.07-334.07

| m/z      | Theo. Mass | Delta (ppm) | RDB equiv. | Composition                                        |
|----------|------------|-------------|------------|----------------------------------------------------|
| 329.0666 | 329.0665   | 0.29        | 3.5        | C <sub>12</sub> H <sub>18</sub> O <sub>7</sub> NaS |
