# Supplementary material for: Skeletal rearrangement of 6,8-dioxabicyclo[3.2.1]octan-4-ols promoted by thionyl chloride or Appel conditions
Source: publisher site journal article supplement (doi:10.3762/bjoc.20.74), 2024-04-16
Supplement: Additional file 2 [file 13d HRMS.pdf › NMR files oxygen migration/13d/13d HRMS.pdf]

E:\Users\...UNE\_BGreatrex\_CyrOxdimer

12/04/23 10:06:58

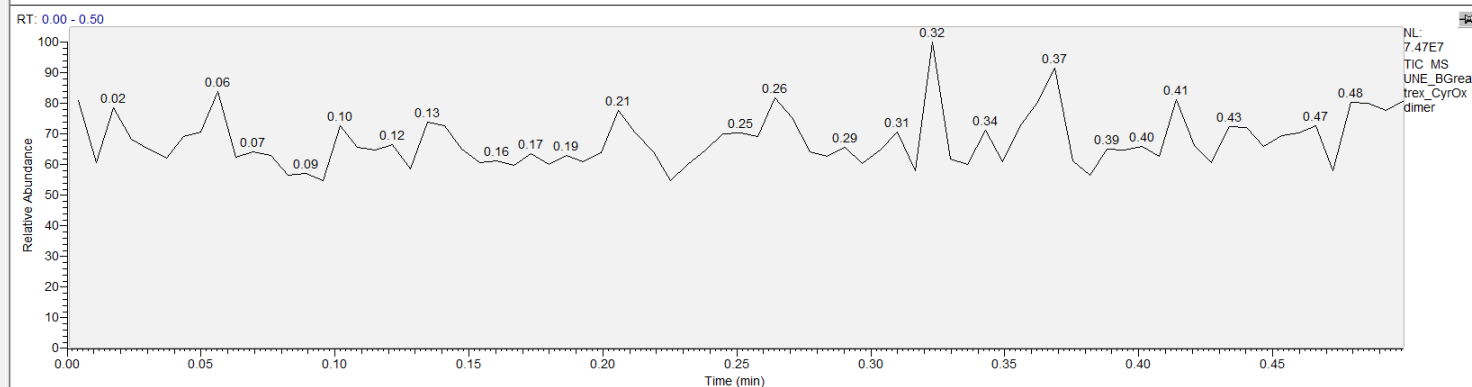

UNE\_BGreatrex\_CyrOxdimer #1-77 RT: 0.00-0.50 AV: 77 NL: 1.60E6  
T: FTMS + p ESI Full ms [100.0000-1000.0000]

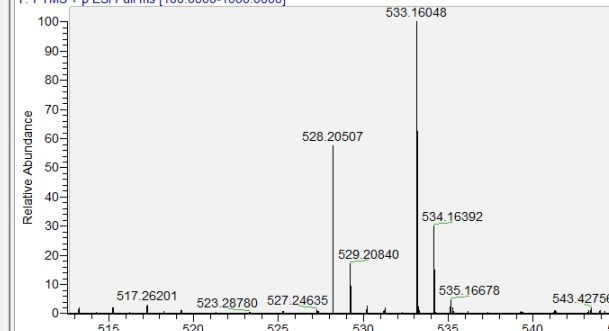

## Elemental composition search on mass 533.16

m/z= 528.16-538.16

| m/z       | Theo. Mass | Delta (ppm) | RDB equiv. | Composition                                                                                  |
|-----------|------------|-------------|------------|----------------------------------------------------------------------------------------------|
| 533.16048 | 533.16048  | 0.00        | 0.5        | C <sub>13</sub> H <sub>34</sub> O <sub>7</sub> Na <sub>8</sub> S <sub>3</sub>                |
| 533.16045 | 533.16045  | 0.07        | 13.5       | C <sub>28</sub> H <sub>30</sub> O <sub>7</sub> Na <sub>8</sub> S                             |
| 533.16044 | 533.16044  | 0.08        | 19.0       | C <sub>27</sub> H <sub>24</sub> O <sub>2</sub> N <sub>7</sub> Na <sub>8</sub> S              |
| 533.16054 | 533.16054  | -0.11       | 12.0       | C <sub>21</sub> H <sub>25</sub> O <sub>7</sub> N <sub>7</sub> Na <sub>2</sub>                |
| 533.16054 | 533.16054  | -0.12       | 6.5        | C <sub>22</sub> H <sub>31</sub> O <sub>12</sub> Na <sub>2</sub>                              |
| 533.16039 | 533.16039  | 0.17        | 2.0        | C <sub>20</sub> H <sub>39</sub> O <sub>7</sub> N <sub>4</sub> S <sub>4</sub>                 |
| 533.16038 | 533.16038  | 0.18        | 7.5        | C <sub>19</sub> H <sub>33</sub> O <sub>2</sub> N <sub>8</sub> S <sub>4</sub>                 |
| 533.16035 | 533.16035  | 0.25        | 20.5       | C <sub>34</sub> H <sub>29</sub> O <sub>2</sub> S <sub>2</sub>                                |
| 533.16066 | 533.16066  | -0.34       | 3.5        | C <sub>21</sub> H <sub>39</sub> O <sub>4</sub> N <sub>2</sub> Na <sub>8</sub> S <sub>4</sub> |
| 533.16026 | 533.16026  | 0.41        | 10.5       | C <sub>20</sub> H <sub>26</sub> O <sub>10</sub> N <sub>6</sub> Na                            |
