# Supplementary material for: Skeletal rearrangement of 6,8-dioxabicyclo[3.2.1]octan-4-ols promoted by thionyl chloride or Appel conditions
Source: publisher site journal article supplement (doi:10.3762/bjoc.20.74), 2024-04-16
Supplement: Additional file 2 [file 13e HRMS.pdf › NMR files oxygen migration/13e/13e HRMS.pdf]

Single Mass Analysis

Tolerance = 5.0 PPM / DBE: min = -1.5, max = 120.0  
Element prediction: Off  
Number of isotope peaks used for i-FIT = 3

Monoisotopic Mass, Even Electron Ions  
31 formula(e) evaluated with 1 results within limits (all results (up to 1000) for each mass)  
Elements Used:  
C: 6-16 H: 5-26 O: 0-7 Na: 0-1 S: 0-1  
CyrMe2dimer  
UNE BGreatrex CyrMe2dimer 169 (4.020) Cm (167:199)

1: TOF MS ES+  
3.94e+005

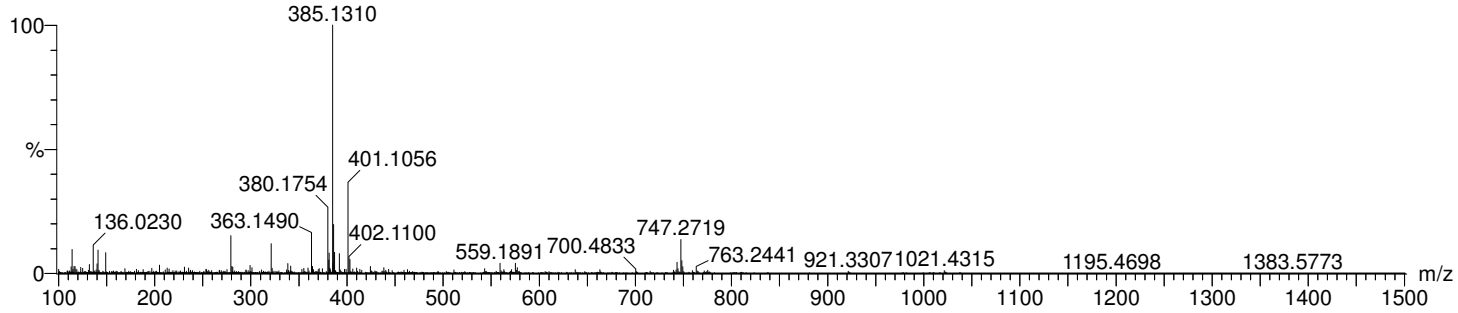

Minimum: -1.5  
Maximum: 55.0 5.0 120.0

| Mass     | Calc. Mass | mDa | PPM | DBE | i-FIT | i-FIT (Norm) | Formula |     |    |    |   |
|----------|------------|-----|-----|-----|-------|--------------|---------|-----|----|----|---|
| 385.1310 | 385.1297   | 1.3 | 3.4 | 3.5 | 425.1 | 0.0          | C16     | H26 | O7 | Na | S |
