# Supplementary material for: Skeletal rearrangement of 6,8-dioxabicyclo[3.2.1]octan-4-ols promoted by thionyl chloride or Appel conditions
Source: publisher site journal article supplement (doi:10.3762/bjoc.20.74), 2024-04-16
Supplement: Additional file 2 [file 20 HRMS.pdf › NMR files oxygen migration/20/20 HRMS.pdf]

Single Mass Analysis

Tolerance = 5.0 PPM / DBE: min = -1.5, max = 120.0

Element prediction: Off

Number of isotope peaks used for i-FIT = 3

Monoisotopic Mass, Even Electron Ions

5 formula(e) evaluated with 1 results within limits (all results (up to 1000) for each mass)

Elements Used:

C: 6-13 H: 5-14 O: 0-2 Cl: 0-1

CrystyRCI

UNE BGreatrex CrystyRCI 76 (1.824) Cm (73:78)

1: TOF MS ES+  
1.43e+003

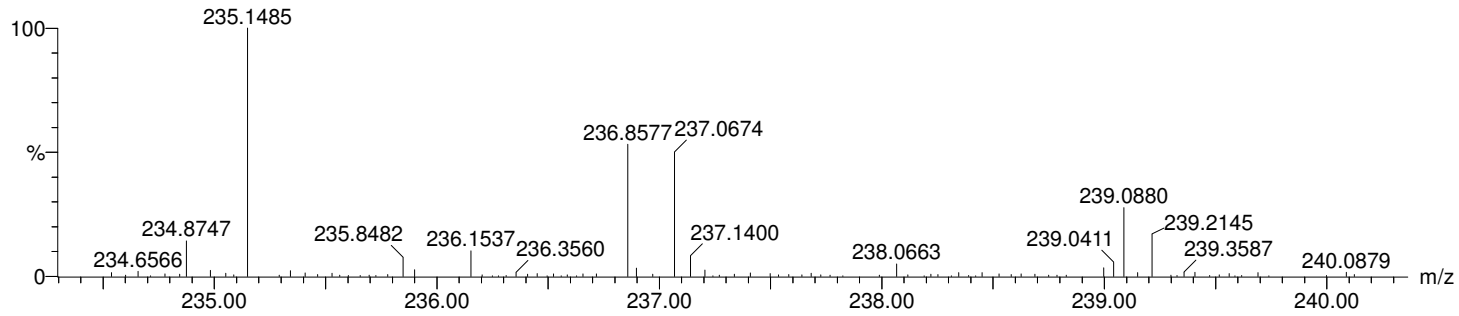

Minimum: -1.5  
Maximum: 55.0 5.0 120.0

| Mass     | Calc. Mass | mDa  | PPM  | DBE | i-FIT | i-FIT (Norm) | Formula       |
|----------|------------|------|------|-----|-------|--------------|---------------|
| 237.0674 | 237.0682   | -0.8 | -3.4 | 6.5 | 226.9 | 0.0          | C13 H14 O2 Cl |
