# Supplementary material for: Skeletal rearrangement of 6,8-dioxabicyclo[3.2.1]octan-4-ols promoted by thionyl chloride or Appel conditions
Source: publisher site journal article supplement (doi:10.3762/bjoc.20.74), 2024-04-16
Supplement: Additional file 2 [file 21 HRMS.pdf › NMR files oxygen migration/21/21 HRMS.pdf]

Single Mass Analysis

Tolerance = 15.0 PPM / DBE: min = -1.5, max = 120.0  
Element prediction: Off  
Number of isotope peaks used for i-FIT = 3

Monoisotopic Mass, Even Electron Ions  
7 formula(e) evaluated with 1 results within limits (all results (up to 1000) for each mass)  
Elements Used:  
C: 10-23 H: 5-27 O: 0-2 S: 0-1  
CyrBn2Rallyl  
UNE BGreatrex CyrBn2Rallyl 73 (1.754) Cm (71:161)

1: TOF MS ES+  
1.10e+004

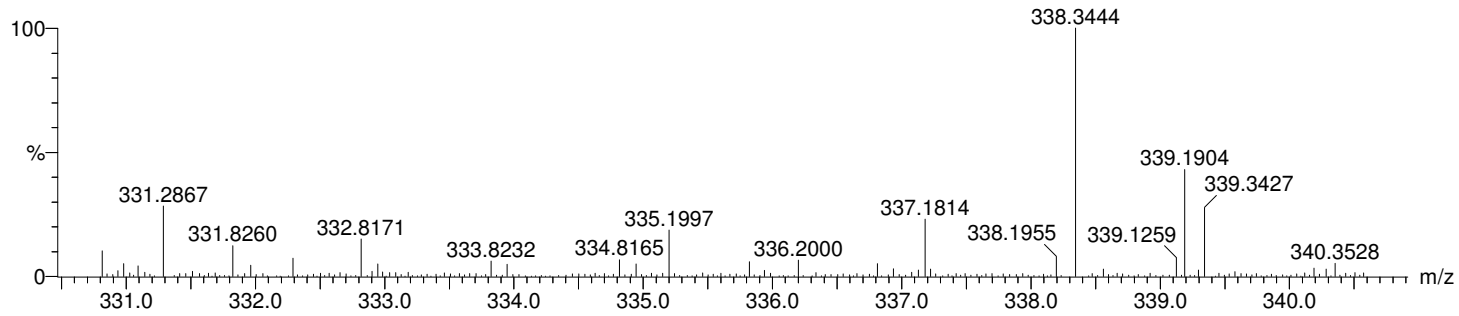

Minimum: -1.5  
Maximum: 55.0 15.0 120.0

| Mass     | Calc. Mass | mDa  | PPM  | DBE  | i-FIT | i-FIT (Norm) | Formula    |
|----------|------------|------|------|------|-------|--------------|------------|
| 335.1997 | 335.2011   | -1.4 | -4.2 | 10.5 | 503.3 | 0.0          | C23 H27 O2 |
