# Supplementary material for: Skeletal rearrangement of 6,8-dioxabicyclo[3.2.1]octan-4-ols promoted by thionyl chloride or Appel conditions
Source: publisher site journal article supplement (doi:10.3762/bjoc.20.74), 2024-04-16
Supplement: Additional file 2 [file 22 HRMS.pdf › NMR files oxygen migration/22/22 HRMS.pdf]

Single Mass Analysis

Tolerance = 5.0 PPM / DBE: min = -1.5, max = 120.0

Element prediction: Off

Number of isotope peaks used for i-FIT = 3

Monoisotopic Mass, Even Electron Ions

5 formula(e) evaluated with 1 results within limits (all results (up to 1000) for each mass)

Elements Used:

C: 6-27 H: 5-28 O: 0-3 Na: 0-1

CyrBn2RanisoIe

UNE BGreatrex CyrBn2RanisoIe 139 (3.312) Cm (129:158)

1: TOF MS ES+  
5.66e+004

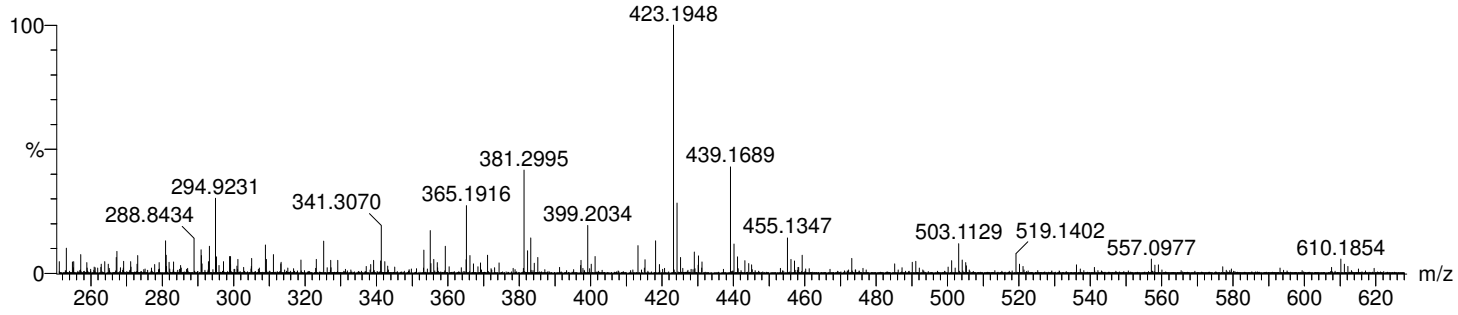

Minimum: -1.5  
Maximum: 55.0 5.0 120.0

| Mass     | Calc. Mass | mDa | PPM | DBE  | i-FIT | i-FIT (Norm) | Formula       |
|----------|------------|-----|-----|------|-------|--------------|---------------|
| 423.1948 | 423.1936   | 1.2 | 2.8 | 13.5 | 348.3 | 0.0          | C27 H28 O3 Na |
