# Supplementary material for: Skeletal rearrangement of 6,8-dioxabicyclo[3.2.1]octan-4-ols promoted by thionyl chloride or Appel conditions
Source: publisher site journal article supplement (doi:10.3762/bjoc.20.74), 2024-04-16
Supplement: Additional file 2 [file 23 HRMS.pdf › NMR files oxygen migration/23/23 HRMS.pdf]

Single Mass Analysis

Tolerance = 5.0 PPM / DBE: min = -1.5, max = 120.0

Element prediction: Off

Number of isotope peaks used for i-FIT = 3

Monoisotopic Mass, Even Electron Ions

4 formula(e) evaluated with 1 results within limits (all results (up to 1000) for each mass)

Elements Used:

C: 10-32 H: 5-30 O: 0-3 Na: 0-1

CyrBn2RphOPh

UNE BGreatrex CyrBn2RphOPh 19 (0.479) Cm (19:100)

1: TOF MS ES+  
4.54e+004

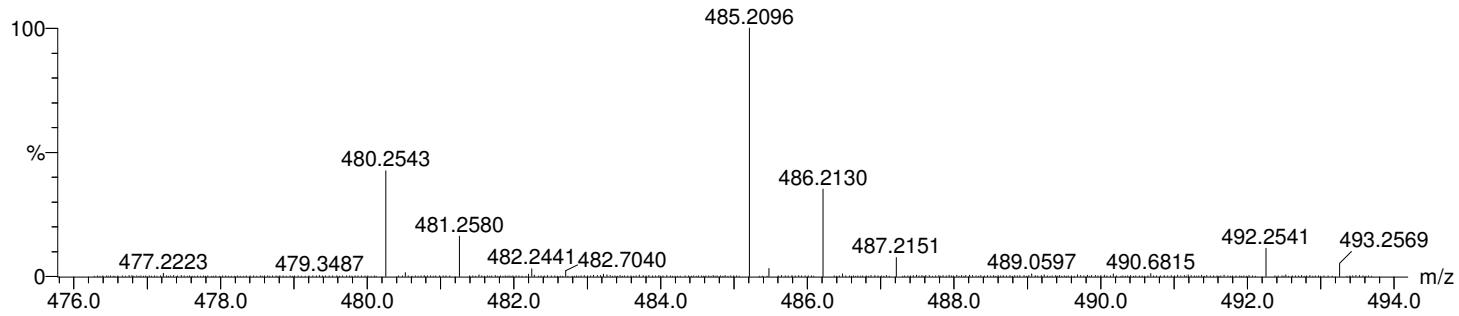

Minimum: -1.5  
Maximum: 55.0 5.0 120.0

| Mass     | Calc. Mass | mDa | PPM | DBE  | i-FIT | i-FIT (Norm) | Formula       |
|----------|------------|-----|-----|------|-------|--------------|---------------|
| 485.2096 | 485.2093   | 0.3 | 0.6 | 17.5 | 388.9 | 0.0          | C32 H30 O3 Na |
