# Supplementary material for: Skeletal rearrangement of 6,8-dioxabicyclo[3.2.1]octan-4-ols promoted by thionyl chloride or Appel conditions
Source: publisher site journal article supplement (doi:10.3762/bjoc.20.74), 2024-04-16

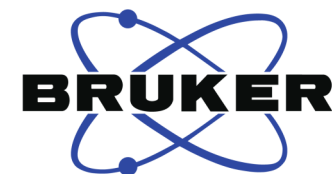

Current Data Parameters  
NAME ABC\_OM\_1-1 (4-6)  
EXPNO 3  
PROCNO 1

F2 - Acquisition Parameters  
Date\_ 20190711  
Time 6.32 h  
INSTRUM spect  
PROBHD Z119470\_0196 (  
PULPROG zg30  
TD 65536  
SOLVENT CDCl3  
NS 16  
DS 2  
SWH 10000.000 Hz  
FIDRES 0.305176 Hz  
AQ 3.2767999 sec  
RG 123.82  
DW 50.000 usec  
DE 6.50 usec  
TE 295.0 K  
D1 1.00000000 sec  
TD0 1  
SFO1 500.1630885 MHz  
NUC1 1H  
P1 10.20 usec  
PLW1 22.00000000 W

F2 - Processing parameters  
SI 65536  
SF 500.1600131 MHz  
WDW EM  
SSB 0  
LB 0.30 Hz  
GB 0  
PC 1.00

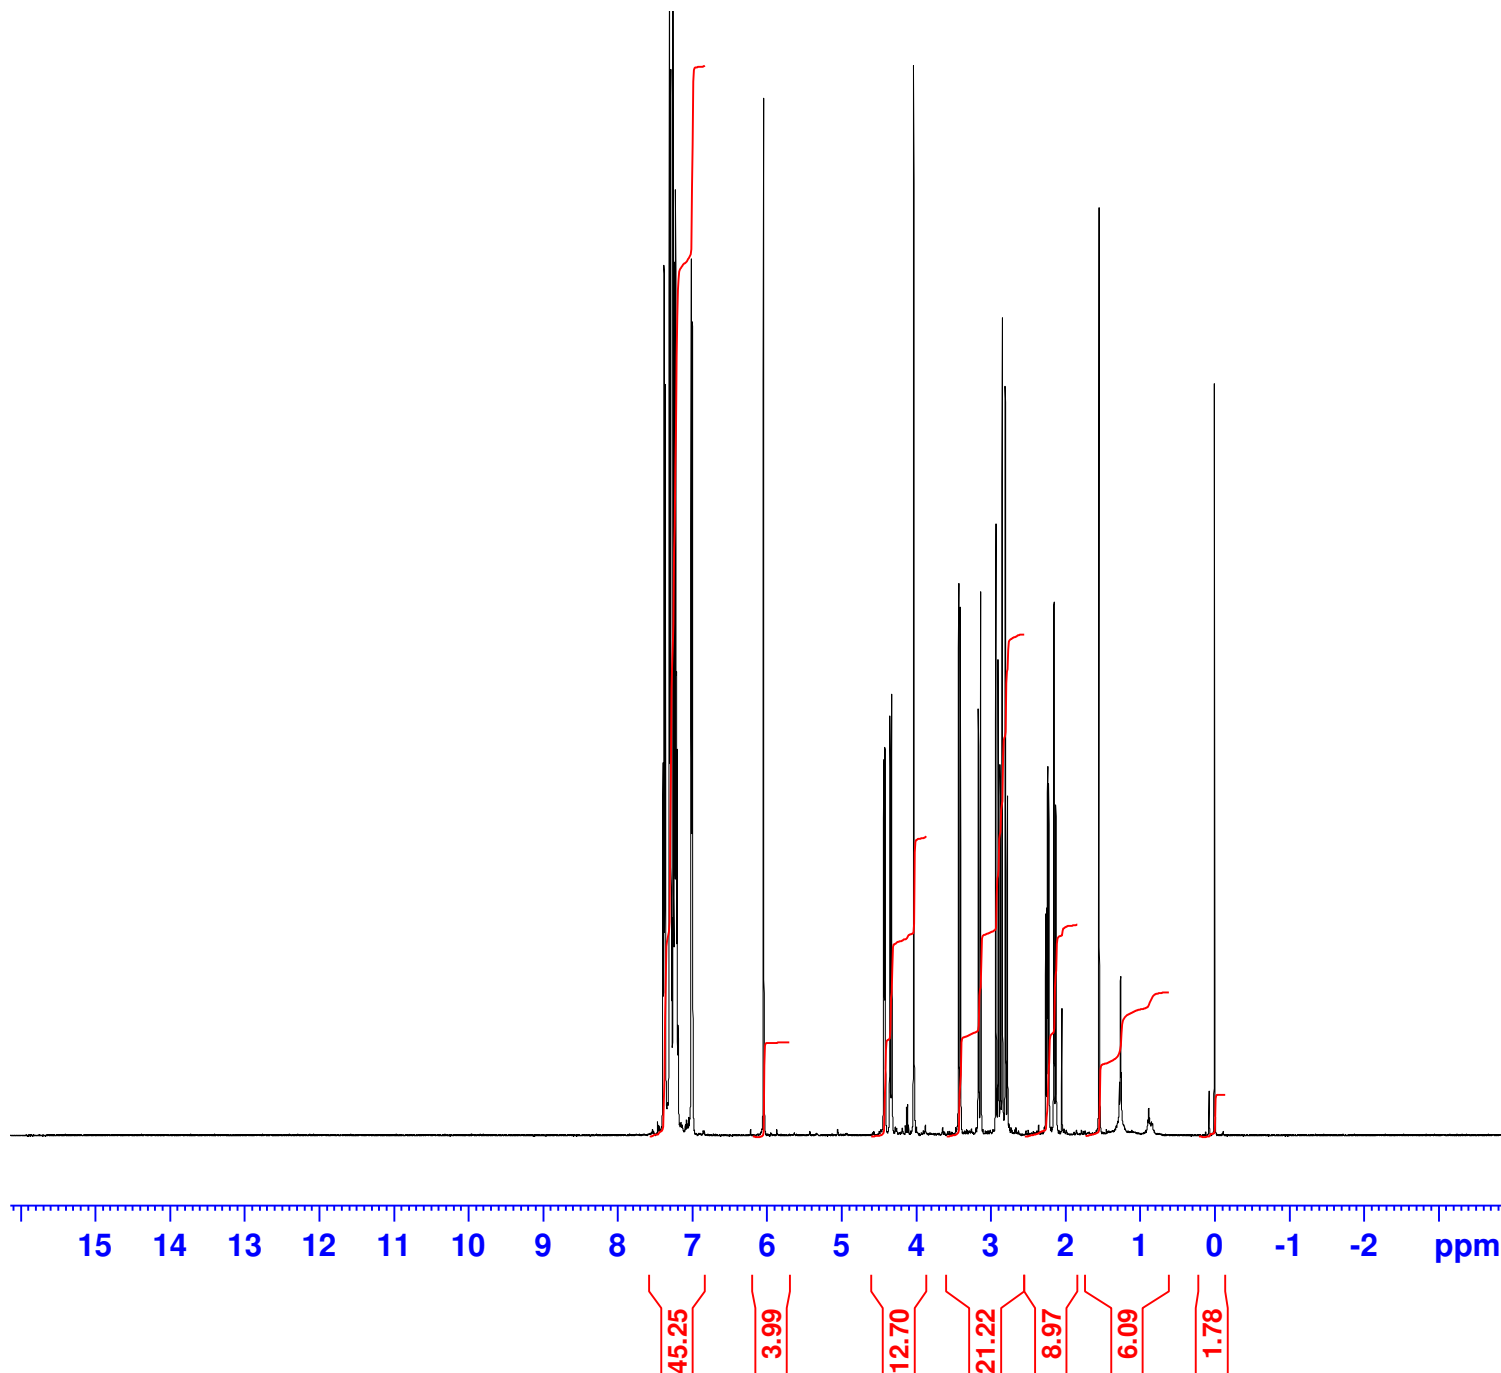

Supplement: Additional file 2 [file ABC_OM_1-1 (4-6)_3_1.pdf › NMR files oxygen migration/11a/1H/pdata/1/ABC_OM_1-1 (4-6)_3_1.pdf]
