# Supplementary material for: Skeletal rearrangement of 6,8-dioxabicyclo[3.2.1]octan-4-ols promoted by thionyl chloride or Appel conditions
Source: publisher site journal article supplement (doi:10.3762/bjoc.20.74), 2024-04-16

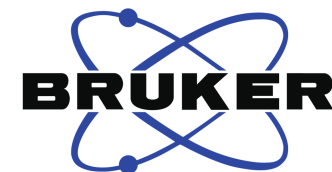

Current Data Parameters  
NAME 64mg\_KMnO4spot\_column\_appel\_lgoallylOH  
EXPNO 1  
PROCNO 1

F2 - Acquisition Parameters  
Date\_ 20230903  
Time 17.17 h  
INSTRUM spect  
PROBHD Z124627\_0019 (   
PULPROG zg30  
TD 65536  
SOLVENT CDCl3  
NS 16  
DS 2  
SWH 10000.000 Hz  
FIDRES 0.305176 Hz  
AQ 3.2767999 sec  
RG 191.36  
DW 50.000 usec  
DE 13.08 usec  
TE 298.0 K  
D1 1.00000000 sec  
TD0 1  
SFO1 500.1630885 MHz  
NUC1 1H  
P0 4.92 usec  
P1 14.75 usec  
PLW1 11.00000000 W

F2 - Processing parameters  
SI 65536  
SF 500.1600000 MHz  
WDW EM  
SSB 0  
LB 0.30 Hz  
GB 0  
PC 1.00

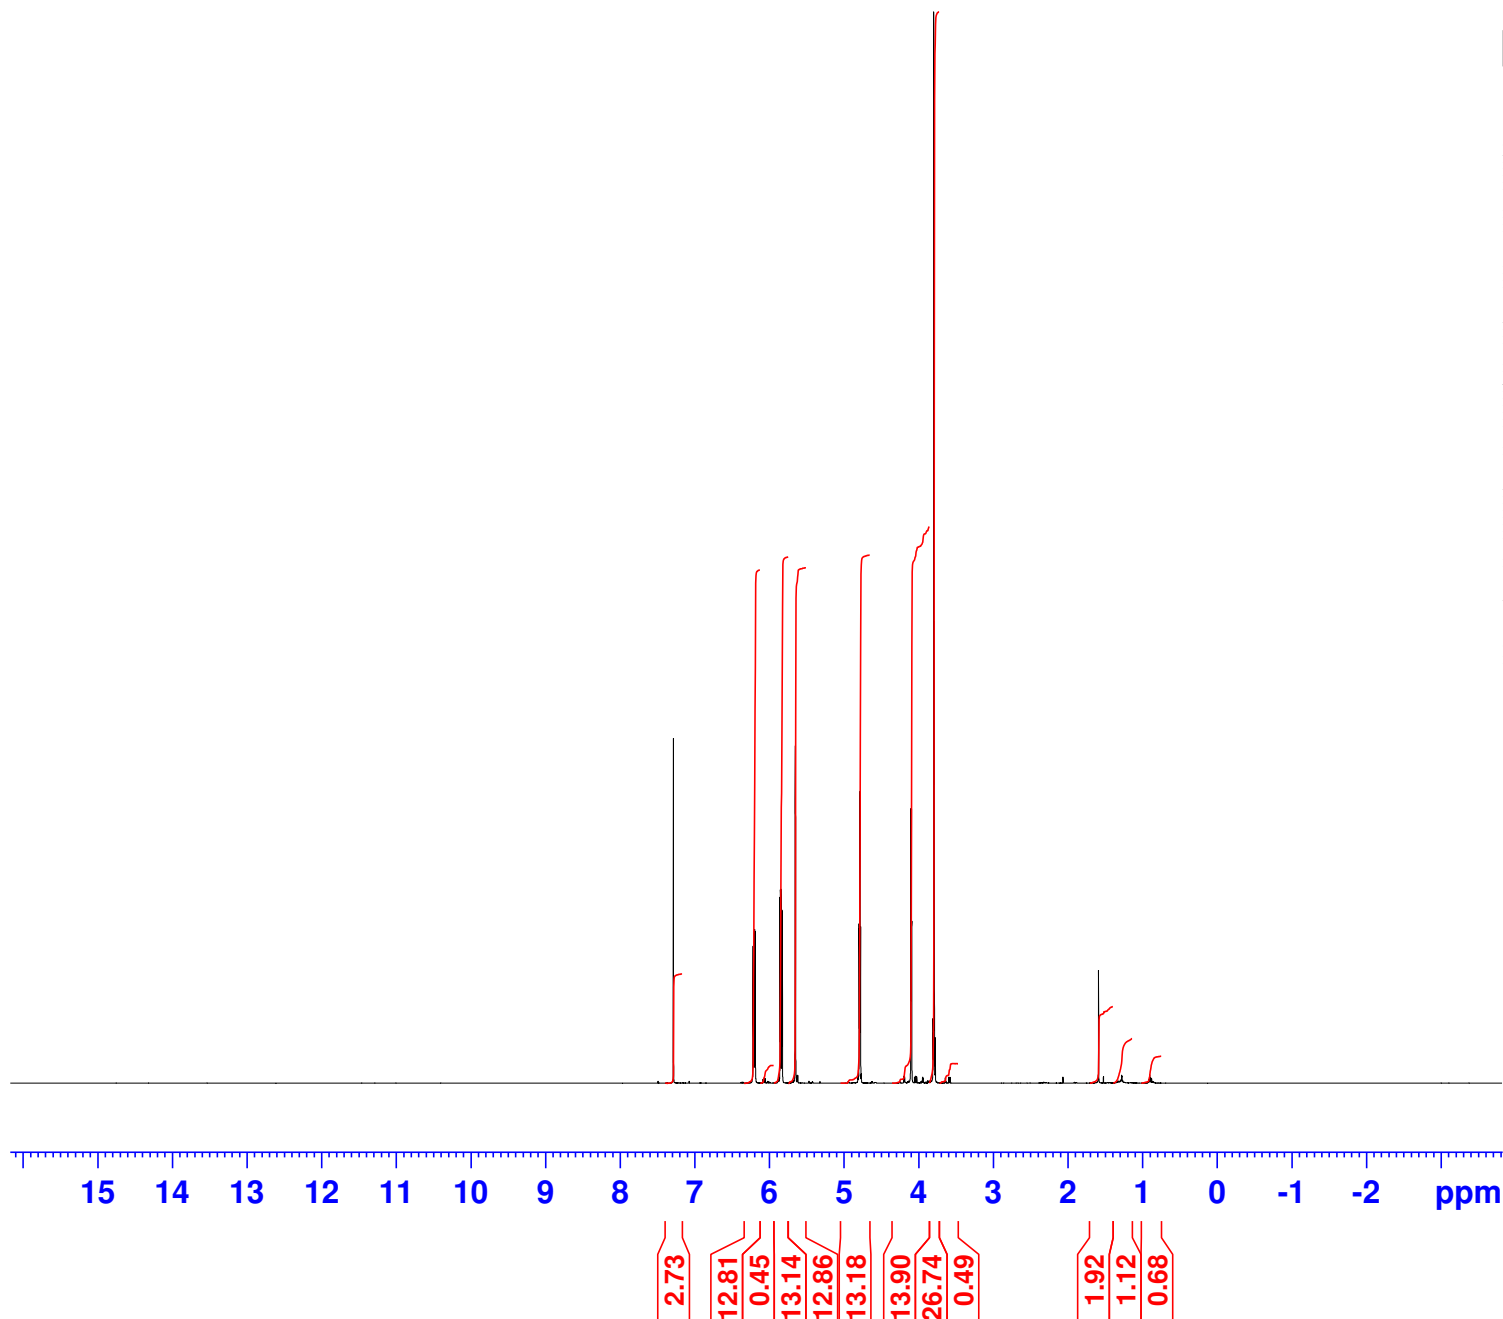

Supplement: Additional file 2 [file email_64mg_KMnO4spot_column_appel_lgoallylOH_1_1.pdf › NMR files oxygen migration/16/1H/pdata/1/email_64mg_KMnO4spot_column_appel_lgoallylOH_1_1.pdf]
