# Supplementary material for: Skeletal rearrangement of 6,8-dioxabicyclo[3.2.1]octan-4-ols promoted by thionyl chloride or Appel conditions
Source: publisher site journal article supplement (doi:10.3762/bjoc.20.74), 2024-04-16

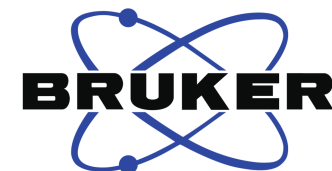

Current Data Parameters  
NAME       cyrBn2R\_PhOPh\_q  
EXPNO       4  
PROCNO      1

F2 - Acquisition Parameters  
Date\_       20230817  
Time        13.43 h  
INSTRUM     spect  
PROBHD      Z119470\_0196 (  
PULPROG     zgpg30  
TD           65536  
SOLVENT     CDCl3  
NS           512  
DS           4  
SWH          29761.904 Hz  
FIDRES       0.908261 Hz  
AQ           1.1010048 sec  
RG           191.36  
DW           16.800 usec  
DE           6.50 usec  
TE           298.0 K  
D1           2.00000000 sec  
D11          0.03000000 sec  
TD0          1  
SFO1         125.7779086 MHz  
NUC1         13C  
P0           3.33 usec  
P1           10.00 usec  
PLW1         78.00000000 W  
SFO2         500.1620006 MHz  
NUC2          1H  
CPDPRG[2]   waltz65  
PCPD2        80.00 usec  
PLW2         22.00000000 W  
PLW12        0.56849003 W  
PLW13        0.28595001 W

F2 - Processing parameters  
SI           32768  
SF           125.7653320 MHz  
WDW          EM  
SSB          0  
LB           1.00 Hz  
GB           0  
PC           1.40

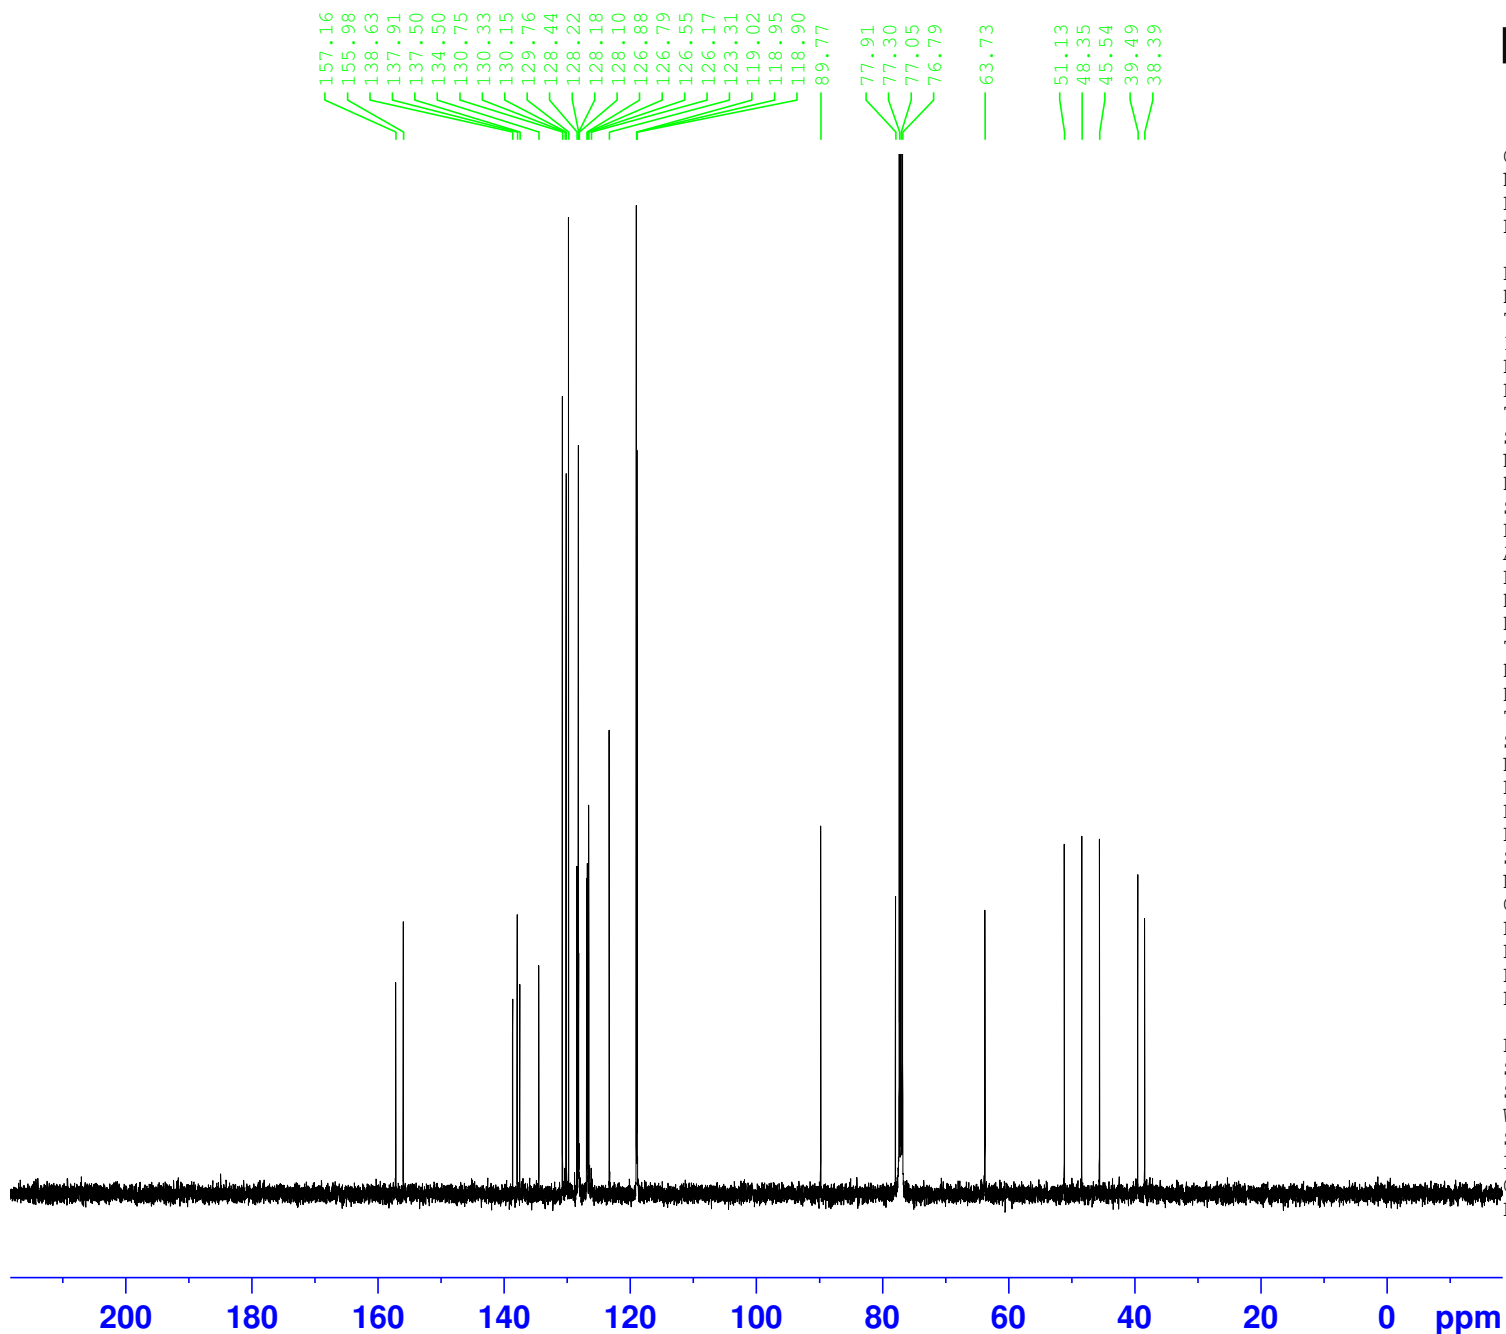

Supplement: Additional file 2 [file email_cyrBn2R_PhOPh_q_4_1.pdf › NMR files oxygen migration/23/13C/pdata/1/email_cyrBn2R_PhOPh_q_4_1.pdf]
