# Supplementary material for: Skeletal rearrangement of 6,8-dioxabicyclo[3.2.1]octan-4-ols promoted by thionyl chloride or Appel conditions
Source: publisher site journal article supplement (doi:10.3762/bjoc.20.74), 2024-04-16
Supplement: Additional file 2 [file email_cyrBn2RCl_allylTMS_highRf_P_4_1.pdf › NMR files oxygen migration/21/13C/pdata/1/email_cyrBn2RCl_allylTMS_highRf_P_4_1.pdf]

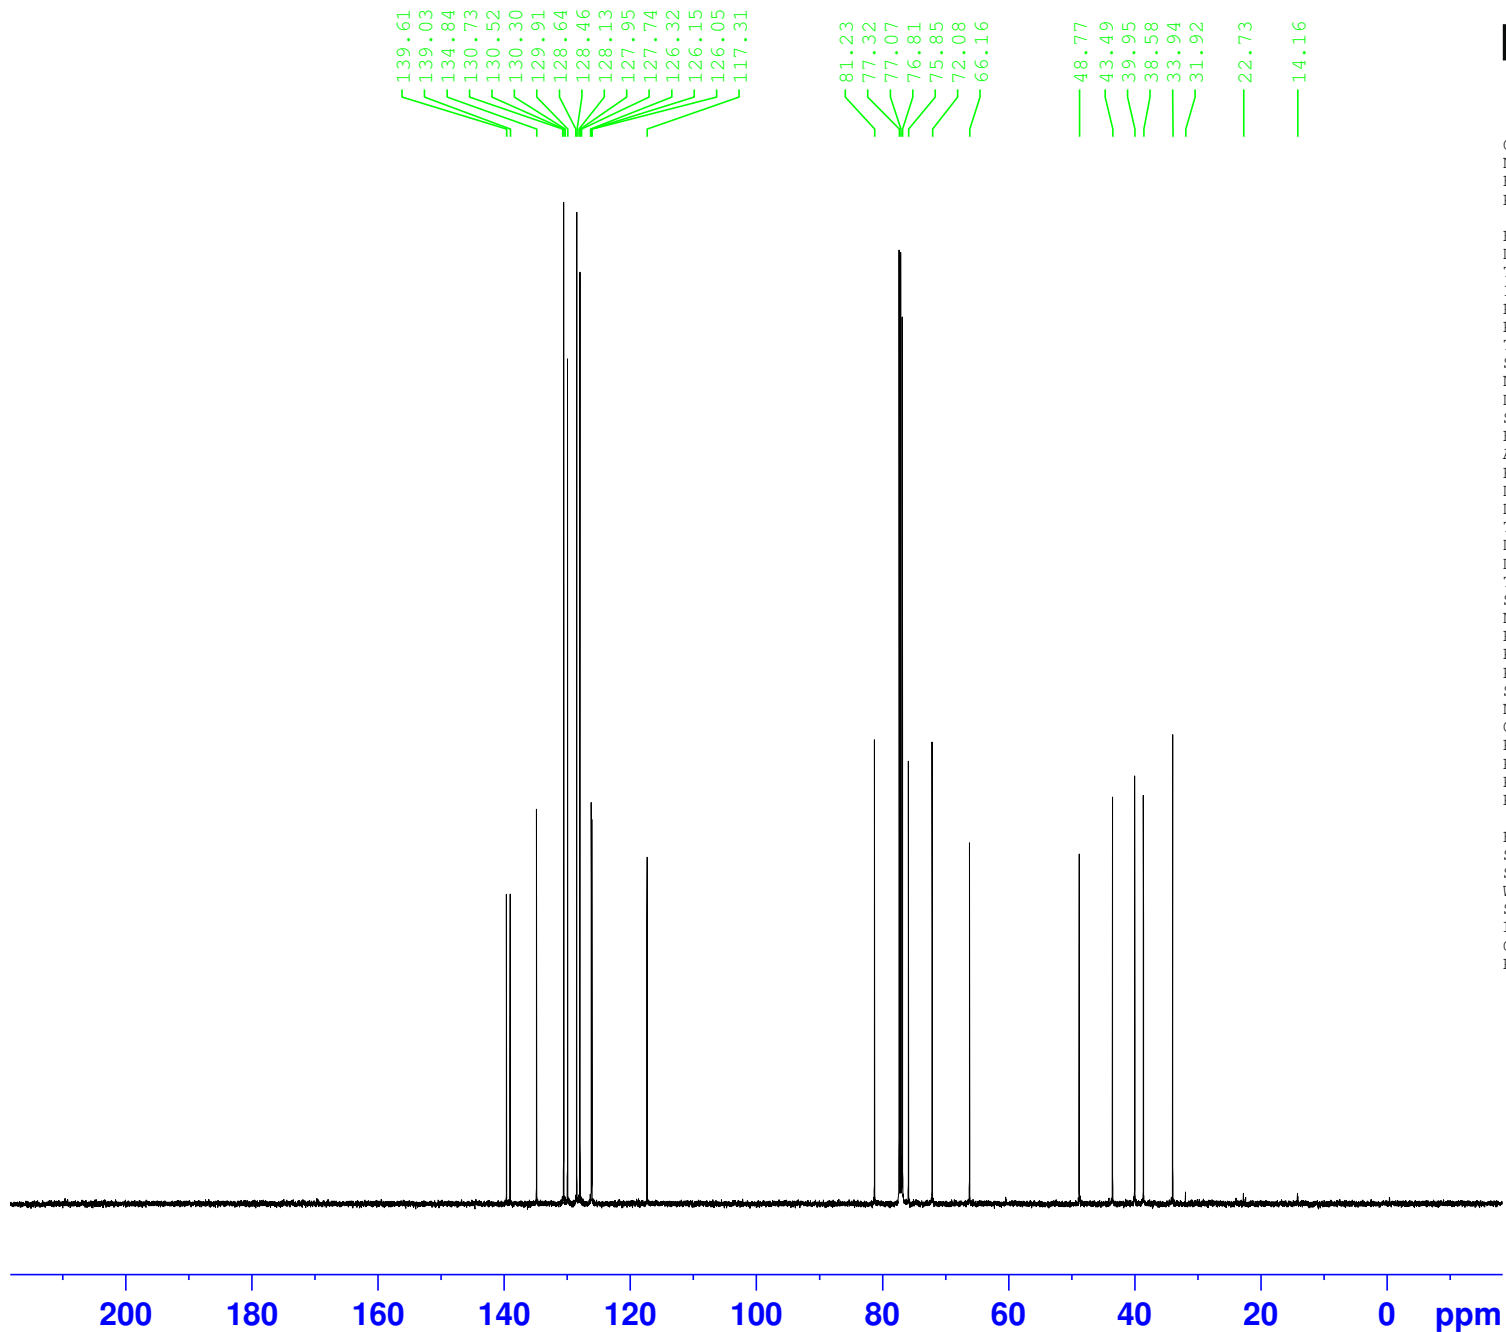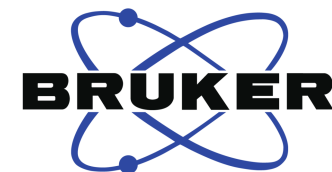

Current Data Parameters  
 NAME cyrBn2RCl\_allylTMS\_highRf\_P  
 EXPNO 4  
 PROCNO 1

F2 - Acquisition Parameters  
 Date\_ 20230806  
 Time 16.35 h  
 INSTRUM spect  
 PROBHD Z119470\_0196 (  
 PULPROG zgpg30  
 TD 65536  
 SOLVENT CDCl3  
 NS 1024  
 DS 4  
 SWH 29761.904 Hz  
 FIDRES 0.908261 Hz  
 AQ 1.1010048 sec  
 RG 191.36  
 DW 16.800 usec  
 DE 6.50 usec  
 TE 298.0 K  
 D1 2.00000000 sec  
 D11 0.03000000 sec  
 TD0 1  
 SF01 125.7779086 MHz  
 NUC1 13C  
 P0 3.33 usec  
 P1 10.00 usec  
 PLW1 78.00000000 W  
 SF02 500.1620006 MHz  
 NUC2 1H  
 CPDPRG[2] waltz65  
 PCPD2 80.00 usec  
 PLW2 22.00000000 W  
 PLW12 0.56849003 W  
 PLW13 0.28595001 W

F2 - Processing parameters  
 SI 32768  
 SF 125.7653320 MHz  
 WDW EM  
 SSB 0  
 LB 1.00 Hz  
 GB 0  
 PC 1.40
