# Supplementary material for: Skeletal rearrangement of 6,8-dioxabicyclo[3.2.1]octan-4-ols promoted by thionyl chloride or Appel conditions
Source: publisher site journal article supplement (doi:10.3762/bjoc.20.74), 2024-04-16

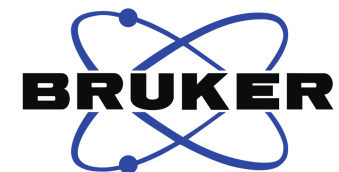

Current Data Parameters  
NAME           cyrMe2\_q  
EXPNO           1  
PROCNO          1

F2 - Acquisition Parameters  
Date\_           20230830  
Time            16.19 h  
INSTRUM        spect  
PROBHD        Z124627\_0019 (  
PULPROG        zg30  
TD             65536  
SOLVENT        CDCl3  
NS             16  
DS             2  
SWH            10000.000 Hz  
FIDRES         0.305176 Hz  
AQ             3.2767999 sec  
RG             191.36  
DW             50.000 usec  
DE             13.08 usec  
TE             298.0 K  
D1             1.00000000 sec  
TD0            1  
SFO1           500.1630885 MHz  
NUC1           1H  
P0             4.92 usec  
P1             14.75 usec  
PLW1           11.00000000 W

F2 - Processing parameters  
SI             65536  
SF             500.1600000 MHz  
WDW            EM  
SSB            0  
LB             0.30 Hz  
GB             0  
PC             1.00

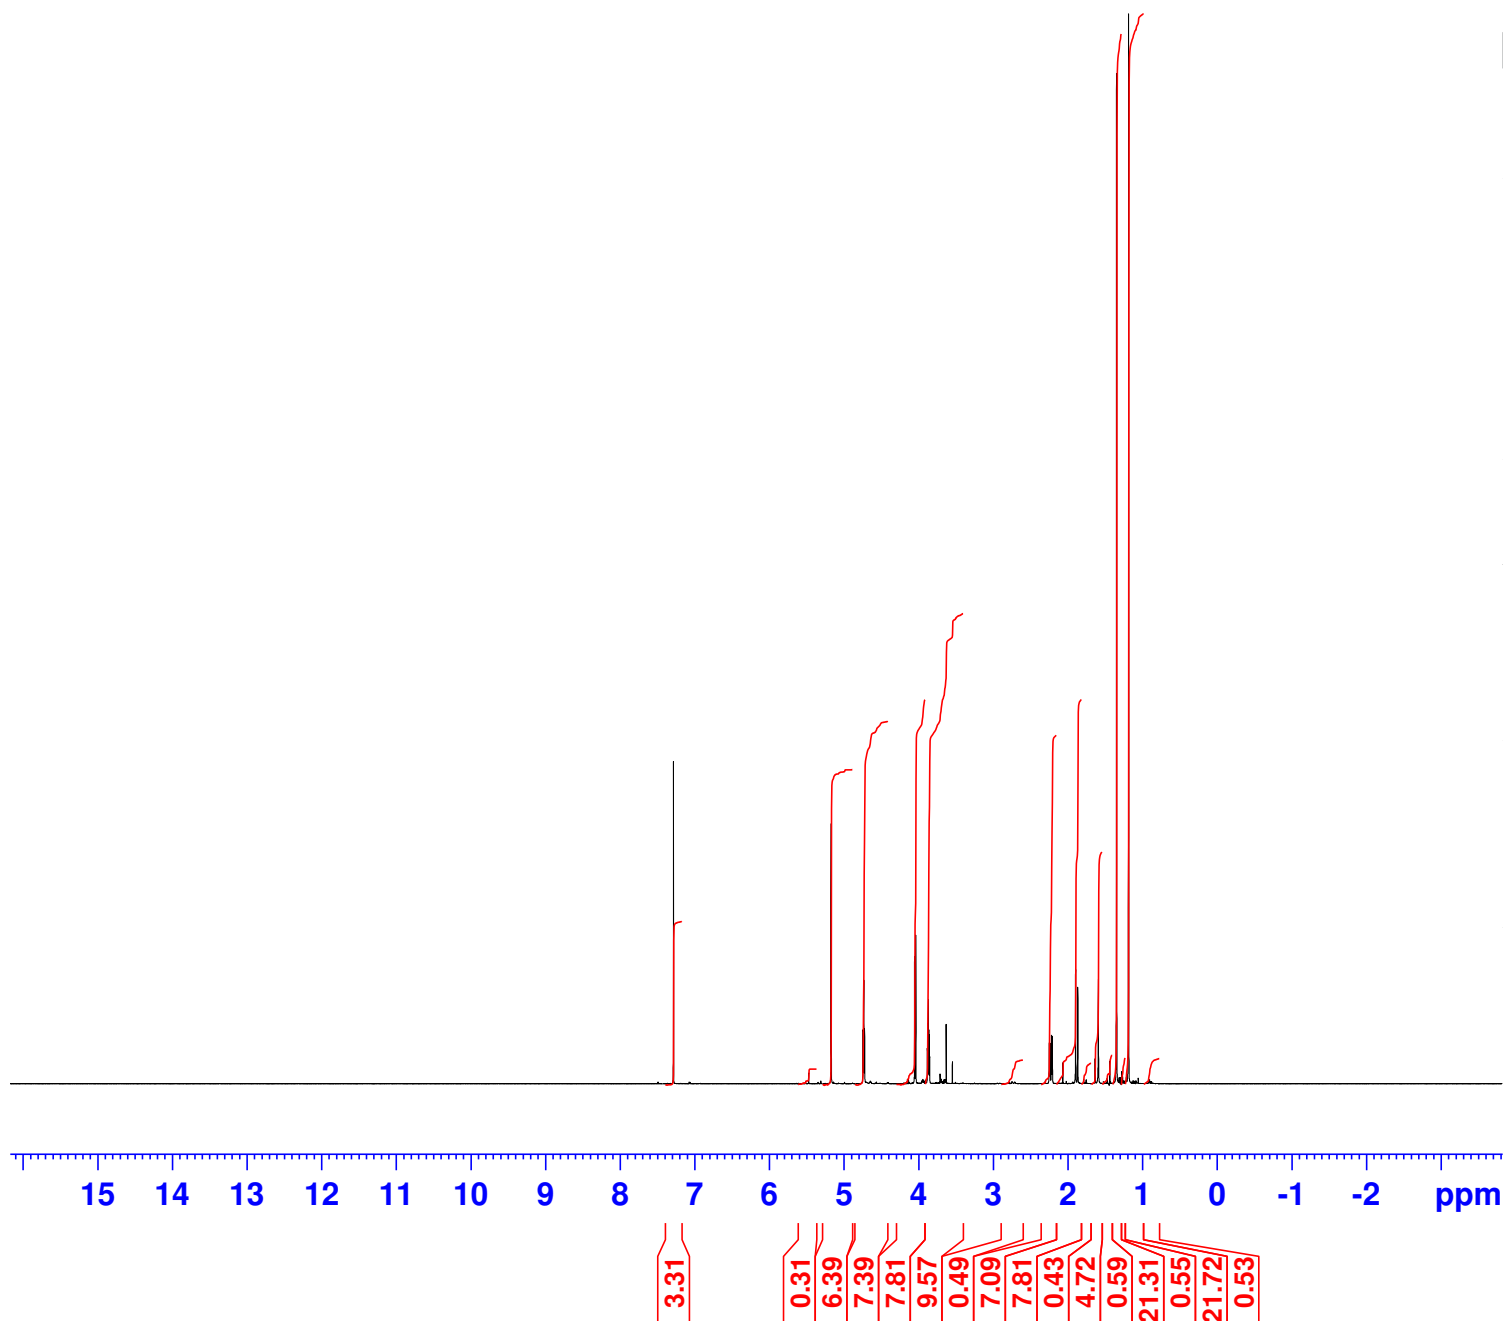

Supplement: Additional file 2 [file email_cyrMe2_q_1_1.pdf › NMR files oxygen migration/9e/1H/pdata/1/email_cyrMe2_q_1_1.pdf]
