# Supplementary material for: Skeletal rearrangement of 6,8-dioxabicyclo[3.2.1]octan-4-ols promoted by thionyl chloride or Appel conditions
Source: publisher site journal article supplement (doi:10.3762/bjoc.20.74), 2024-04-16

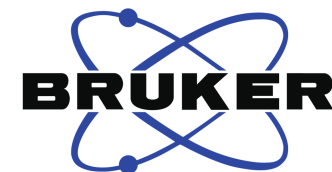

Current Data Parameters  
NAME           cyrMe2\_q  
EXPNO           3  
PROCNO          1

F2 - Acquisition Parameters  
Date\_           20230830  
Time            20.15 h  
INSTRUM        spect  
PROBHD        Z124627\_0019 (  
PULPROG        zgpg30  
TD             65536  
SOLVENT        CDCl3  
NS             256  
DS             4  
SWH            29761.904 Hz  
FIDRES         0.908261 Hz  
AQ             1.1010048 sec  
RG             191.36  
DW             16.800 usec  
DE             6.50 usec  
TE             298.0 K  
D1             2.00000000 sec  
D11            0.03000000 sec  
TD0            1  
SFO1           125.7779086 MHz  
NUC1           13C  
P0             3.33 usec  
P1             10.00 usec  
PLW1           41.00000000 W  
SFO2           500.1620006 MHz  
NUC2           1H  
CPDPRG[2       waltz65  
PCPD2          80.00 usec  
PLW2           11.00000000 W  
PLW12          0.37393999 W  
PLW13          0.18809000 W

F2 - Processing parameters  
SI             32768  
SF             125.7653320 MHz  
WDW            EM  
SSB            0  
LB             1.00 Hz  
GB             0  
PC             1.40

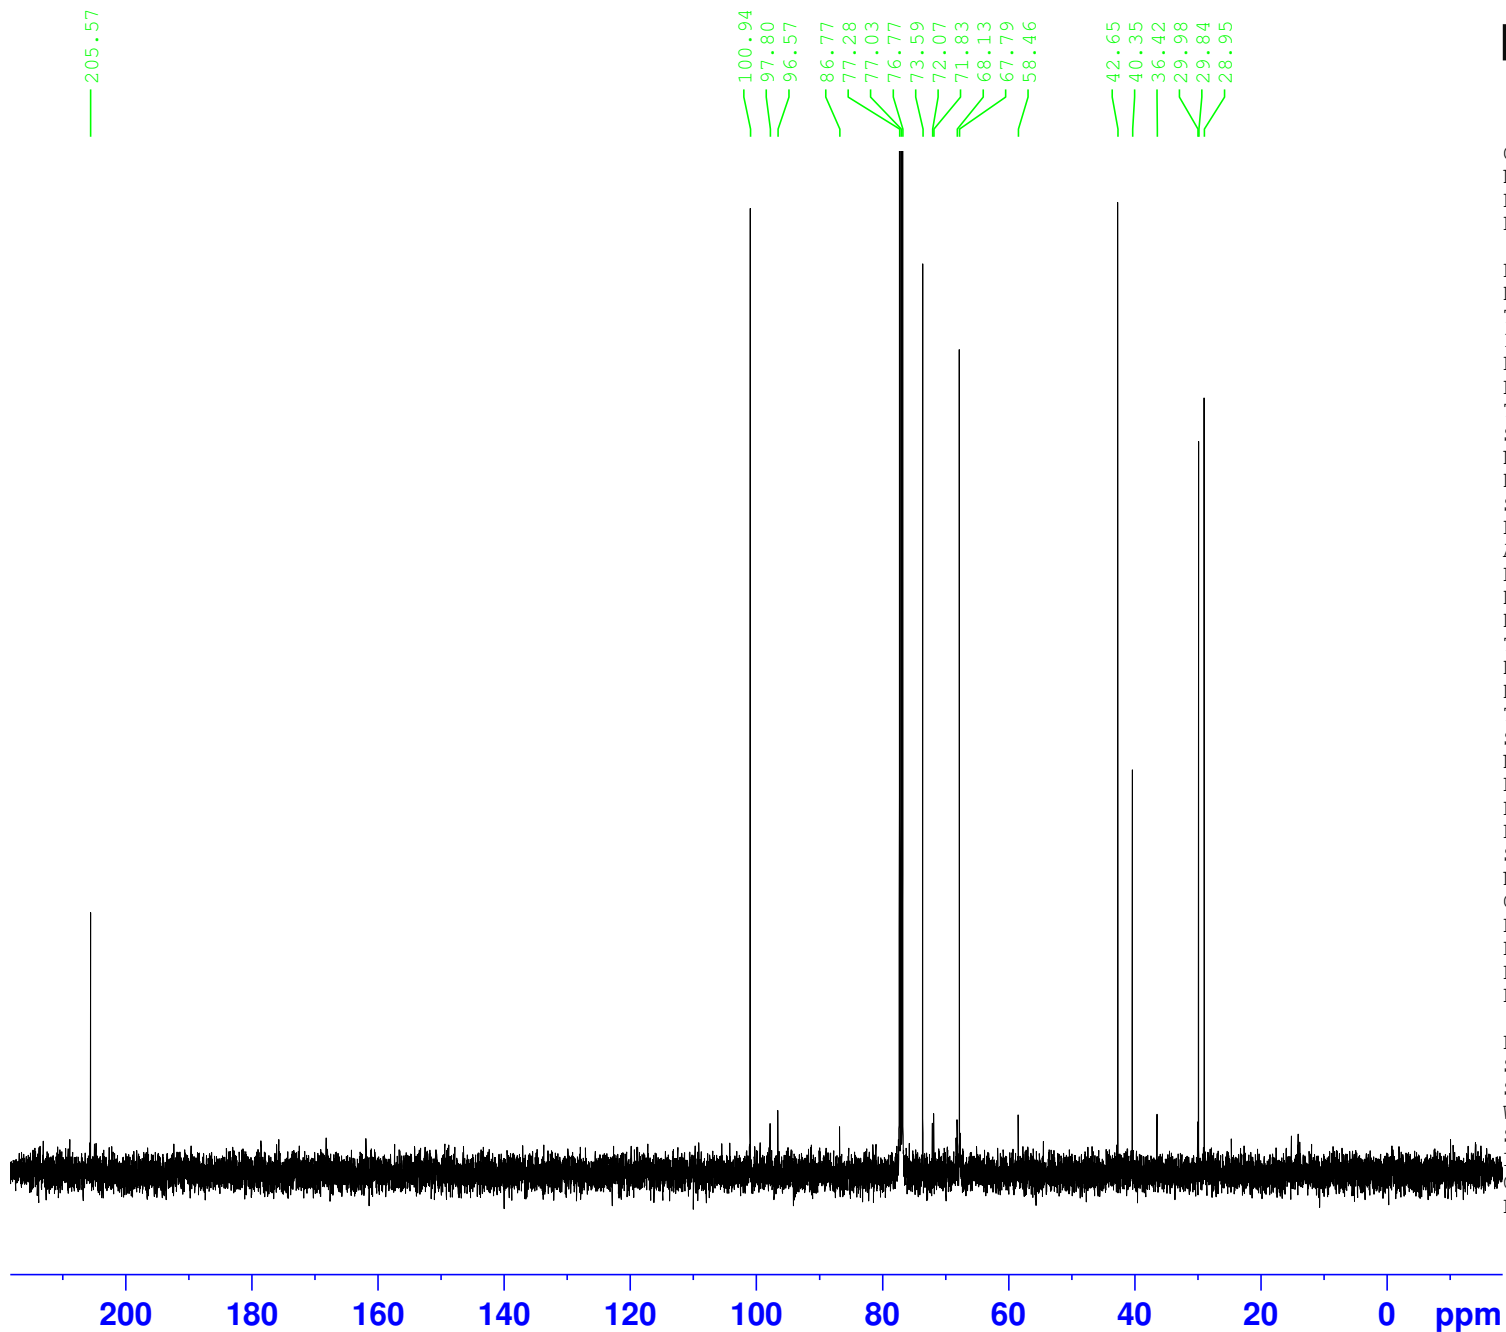

Supplement: Additional file 2 [file email_cyrMe2_q_3_1.pdf › NMR files oxygen migration/9e/13C/pdata/1/email_cyrMe2_q_3_1.pdf]
