# Supplementary material for: Skeletal rearrangement of 6,8-dioxabicyclo[3.2.1]octan-4-ols promoted by thionyl chloride or Appel conditions
Source: publisher site journal article supplement (doi:10.3762/bjoc.20.74), 2024-04-16

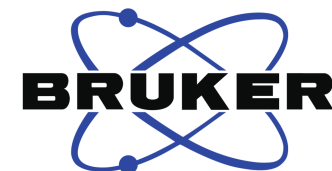

Current Data Parameters  
NAME      cyrMe2OH\_SOC12\_etoac Extr\_highRf\_50mg  
EXPNO      2  
PROCNO     1

F2 - Acquisition Parameters  
Date\_       20230914  
Time        13.09 h  
INSTRUM     spect  
PROBHD      Z124627\_0019 (   
PULPROG     zgpg30  
TD           65536  
SOLVENT     CDCl3  
NS           256  
DS           4  
SWH          29761.904 Hz  
FIDRES       0.908261 Hz  
AQ          1.1010048 sec  
RG          191.36  
DW          16.800 usec  
DE          6.50 usec  
TE          298.0 K  
D1          2.00000000 sec  
D11         0.03000000 sec  
TD0          1  
SFO1        125.7779086 MHz  
NUC1         13C  
P0           3.33 usec  
P1          10.00 usec  
PLW1        41.00000000 W  
SFO2        500.1620006 MHz  
NUC2         1H  
CPDPRG[2]   waltz65  
PCPD2        80.00 usec  
PLW2        11.00000000 W  
PLW12        0.37393999 W  
PLW13        0.18809000 W

F2 - Processing parameters  
SI          32768  
SF          125.7653320 MHz  
WDW         EM  
SSB          0  
LB          1.00 Hz  
GB          0  
PC          1.40

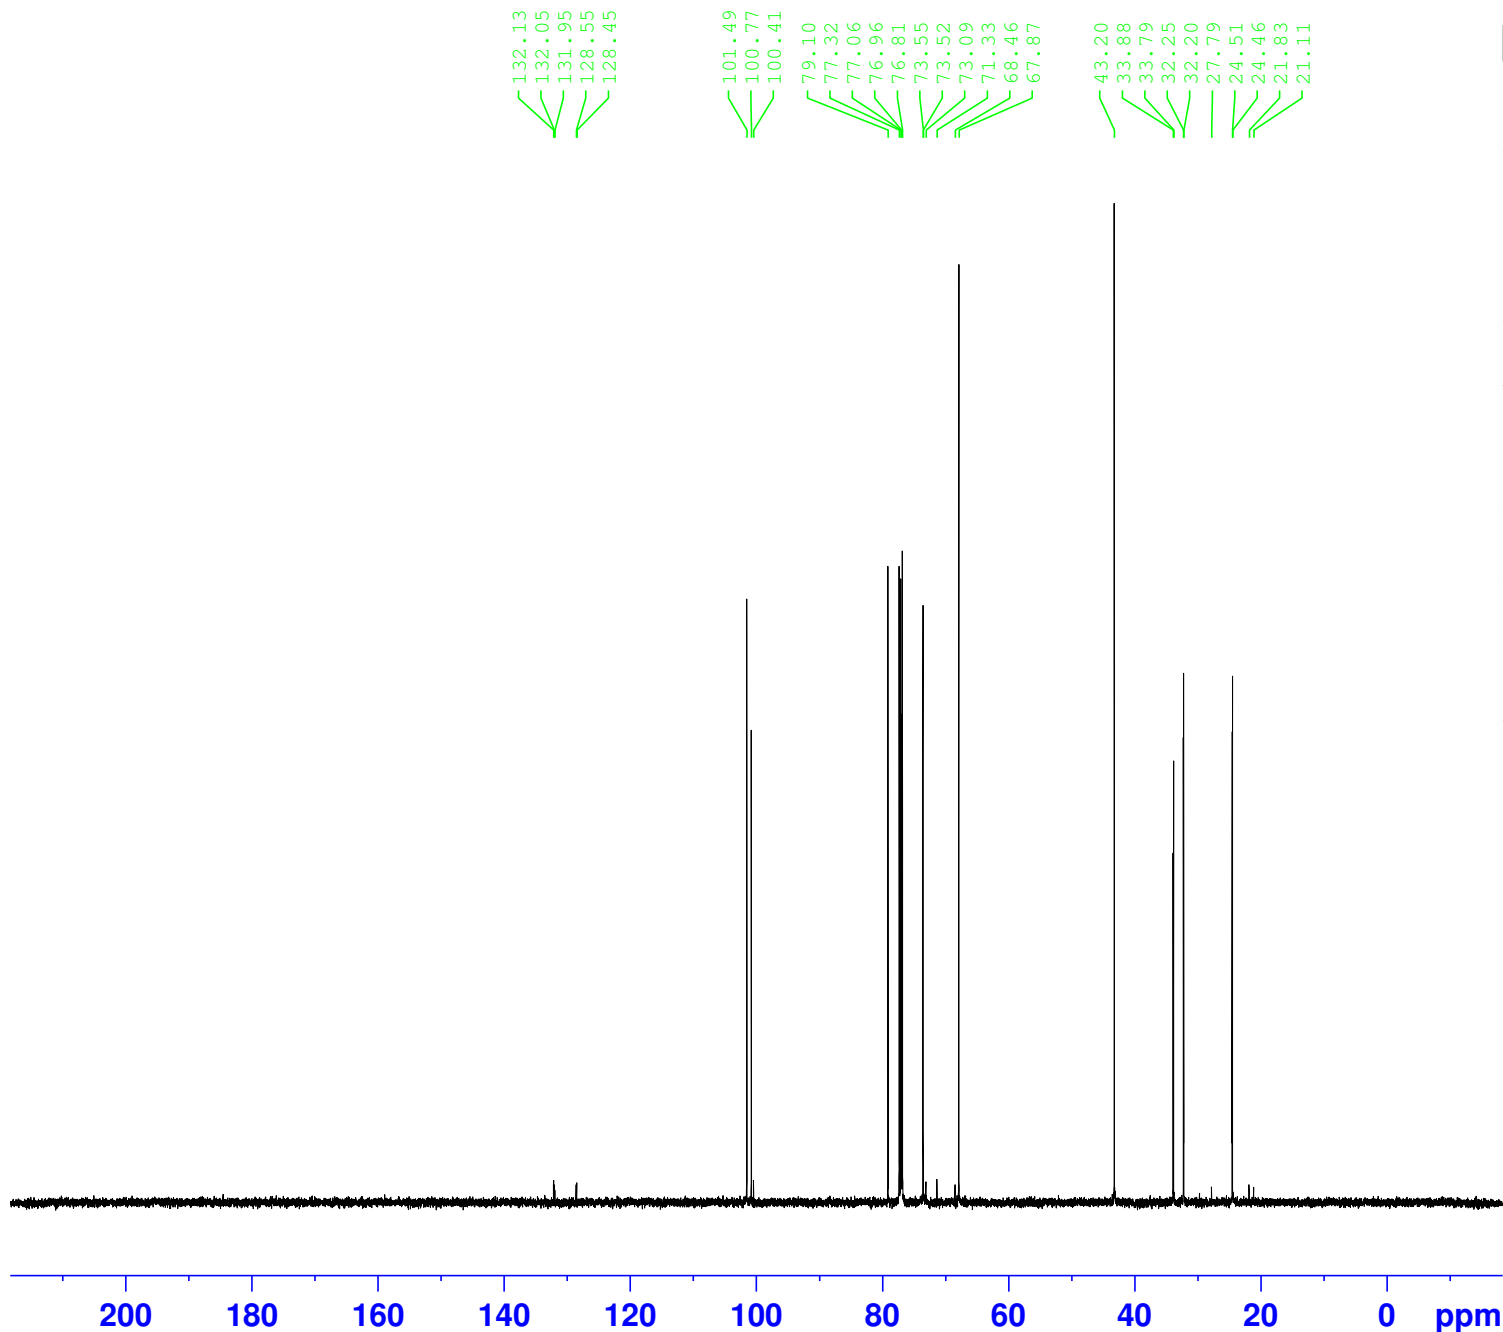

Supplement: Additional file 2 [file email_cyrMe2OH_SOCl2_etoac_extr_highRf_50mg_2_1.pdf › NMR files oxygen migration/13e/13C/pdata/1/email_cyrMe2OH_SOCl2_etoac_extr_highRf_50mg_2_1.pdf]
