# Supplementary material for: Skeletal rearrangement of 6,8-dioxabicyclo[3.2.1]octan-4-ols promoted by thionyl chloride or Appel conditions
Source: publisher site journal article supplement (doi:10.3762/bjoc.20.74), 2024-04-16

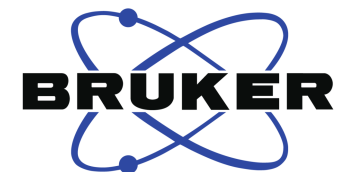

Current Data Parameters  
NAME     cyrMe2OH\_SOCl2\_etoac\_extr\_highRf\_50mg  
EXPNO     3  
PROCNO    1

F2 - Acquisition Parameters  
Date\_     20230914  
Time      16.18 h  
INSTRUM   spect  
PROBHD    Z124627\_0019 (   
PULPROG    zg30  
TD          65536  
SOLVENT    CDCl3  
NS          16  
DS          2  
SWH        10000.000 Hz  
FIDRES     0.305176 Hz  
AQ         3.2767999 sec  
RG          70.1  
DW         50.000 usec  
DE         13.08 usec  
TE         298.0 K  
D1          1.00000000 sec  
TD0        1  
SFO1       500.1630885 MHz  
NUC1       1H  
P0          4.92 usec  
P1          14.75 usec  
PLW1       11.00000000 W

F2 - Processing parameters  
SI          65536  
SF         500.1600369 MHz  
WDW        EM  
SSB        0  
LB          0.30 Hz  
GB          0  
PC          1.00

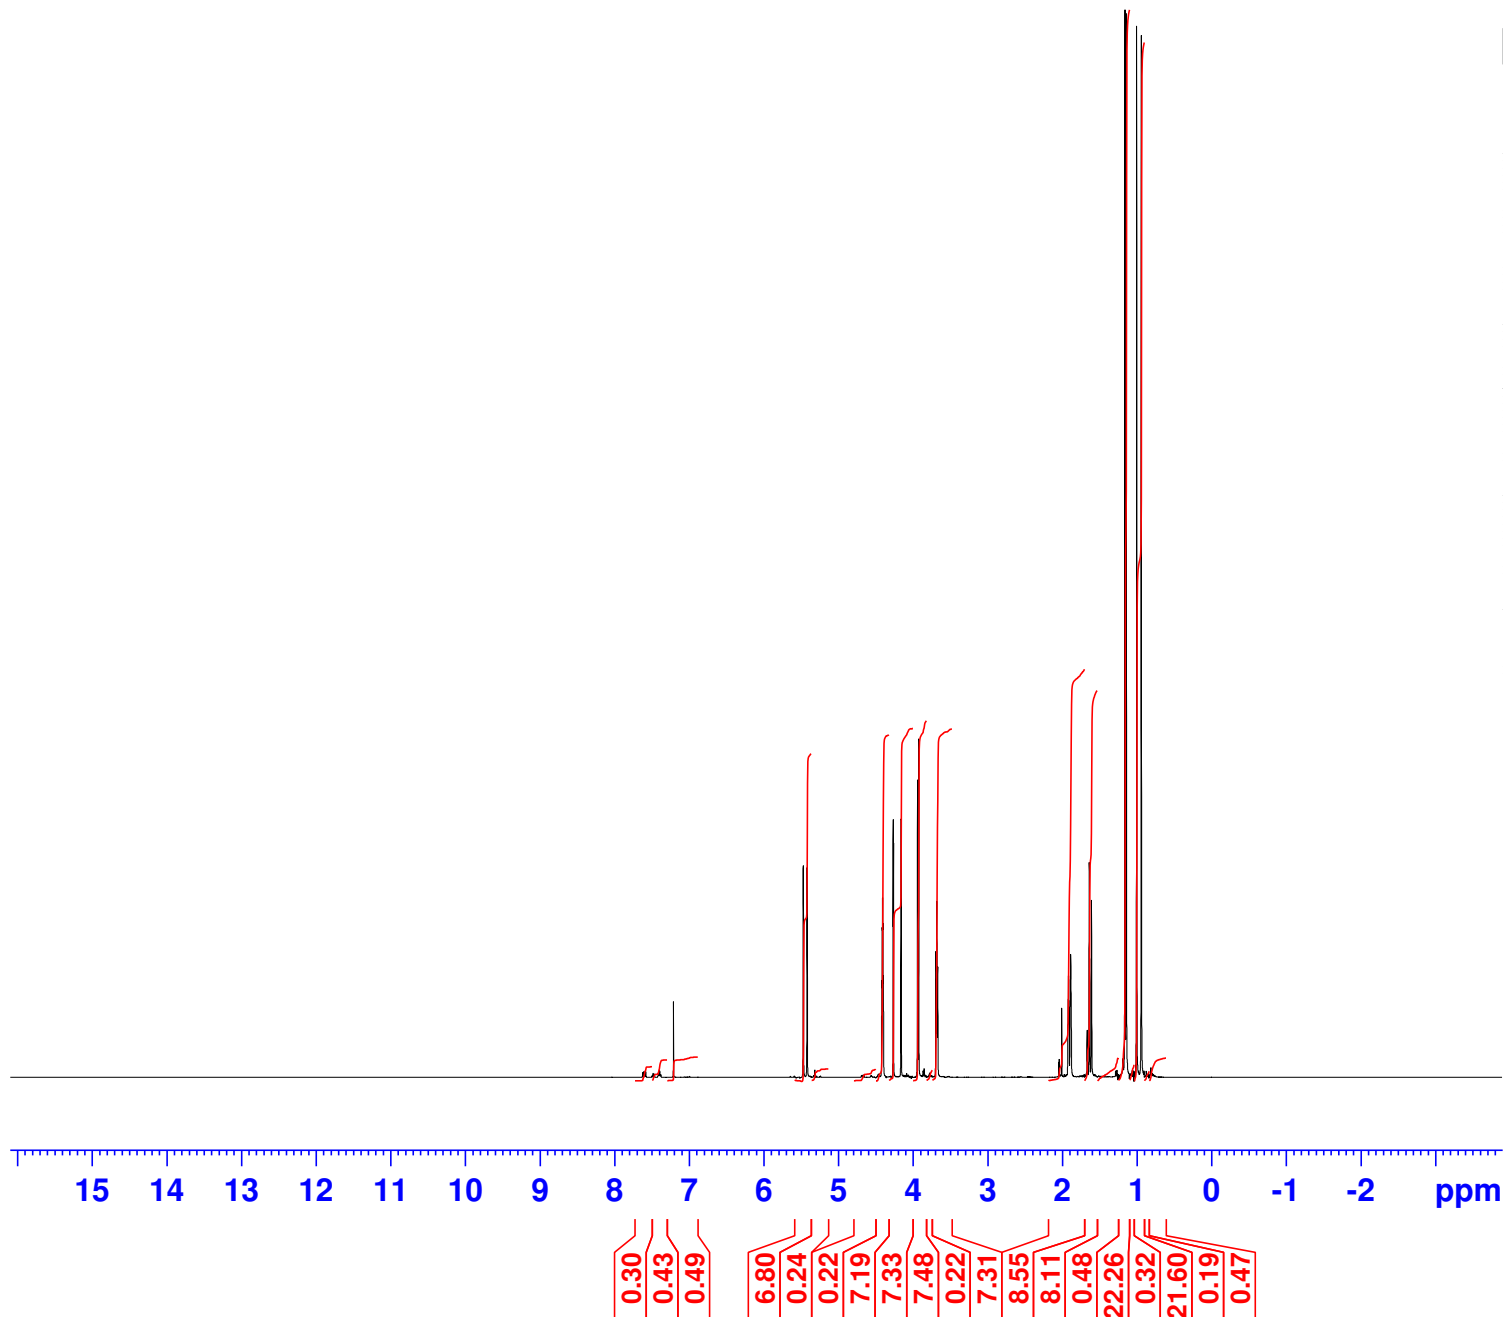

Supplement: Additional file 2 [file email_cyrMe2OH_SOCl2_etoac_extr_highRf_50mg_3_1.pdf › NMR files oxygen migration/13e/1H/pdata/1/email_cyrMe2OH_SOCl2_etoac_extr_highRf_50mg_3_1.pdf]
