# Supplementary material for: Skeletal rearrangement of 6,8-dioxabicyclo[3.2.1]octan-4-ols promoted by thionyl chloride or Appel conditions
Source: publisher site journal article supplement (doi:10.3762/bjoc.20.74), 2024-04-16

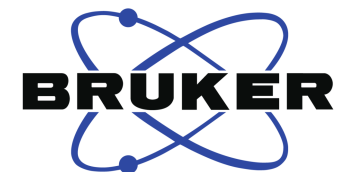

Current Data Parameters  
NAME       cyrMe2ROH\_30mg  
EXPNO       1  
PROCNO      1

F2 - Acquisition Parameters  
Date\_       20230929  
Time        12.19 h  
INSTRUM     spect  
PROBHD      Z124627\_0019 (  
PULPROG     zg30  
TD          65536  
SOLVENT     CDCl3  
NS          16  
DS          2  
SWH         10000.000 Hz  
FIDRES      0.305176 Hz  
AQ          3.2767999 sec  
RG          152.68  
DW          50.000 usec  
DE          13.08 usec  
TE          298.0 K  
D1          1.00000000 sec  
TD0         1  
SFO1        500.1630885 MHz  
NUC1         1H  
P0          4.92 usec  
P1          14.75 usec  
PLW1        11.00000000 W

F2 - Processing parameters  
SI          65536  
SF          500.1600000 MHz  
WDW         EM  
SSB         0  
LB          0.30 Hz  
GB          0  
PC          1.00

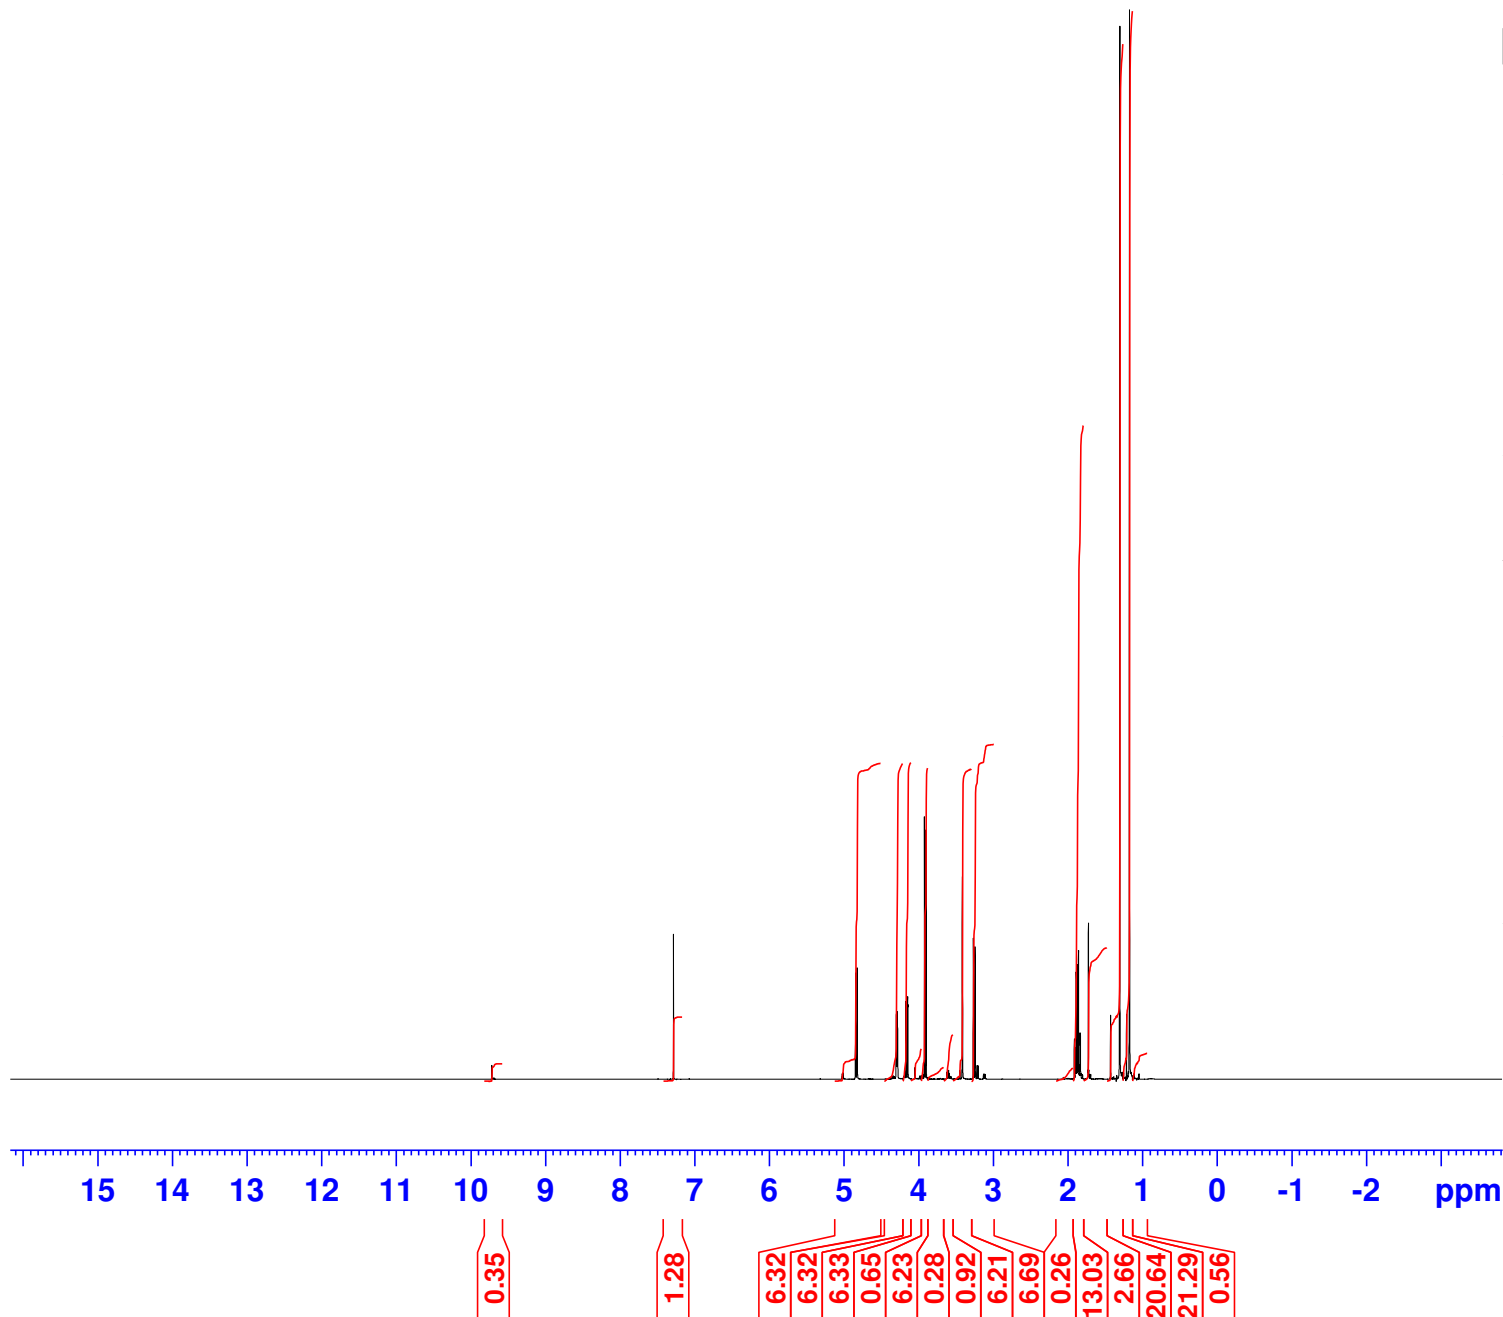

Supplement: Additional file 2 [file email_cyrMe2ROH_30mg_1_1.pdf › NMR files oxygen migration/12e/1H/pdata/1/email_cyrMe2ROH_30mg_1_1.pdf]
