# Supplementary material for: Skeletal rearrangement of 6,8-dioxabicyclo[3.2.1]octan-4-ols promoted by thionyl chloride or Appel conditions
Source: publisher site journal article supplement (doi:10.3762/bjoc.20.74), 2024-04-16

203.94

96.40  
90.41  
90.05  
85.68  
80.17  
77.29  
77.03  
76.78  
76.76  
75.12  
71.63  
65.55  
63.88  
44.54  
41.61  
40.14  
39.84  
32.31  
31.22  
28.32  
23.69  
22.23  
22.06

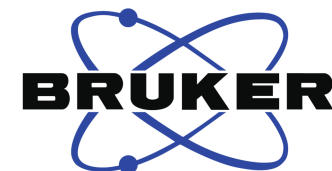

Current Data Parameters  
NAME       cyrMe2ROH\_30mg  
EXPNO       2  
PROCNO      1

F2 - Acquisition Parameters  
Date\_       20230929  
Time        13.19 h  
INSTRUM     spect  
PROBHD      Z124627\_0019 (  
PULPROG     zgpg30  
TD          65536  
SOLVENT     CDCl3  
NS          1024  
DS          4  
SWH         29761.904 Hz  
FIDRES      0.908261 Hz  
AQ          1.1010048 sec  
RG          191.36  
DW          16.800 usec  
DE          6.50 usec  
TE          298.0 K  
D1          2.00000000 sec  
D11         0.03000000 sec  
TD0         1  
SFO1        125.7779086 MHz  
NUC1        13C  
P0          3.33 usec  
P1          10.00 usec  
PLW1        41.00000000 W  
SFO2        500.1620006 MHz  
NUC2        1H  
CPDPRG[2]   waltz65  
PCPD2       80.00 usec  
PLW2        11.00000000 W  
PLW12       0.37393999 W  
PLW13       0.18809000 W

F2 - Processing parameters  
SI          32768  
SF          125.7653320 MHz  
WDW         EM  
SSB         0  
LB          1.00 Hz  
GB          0  
PC          1.40

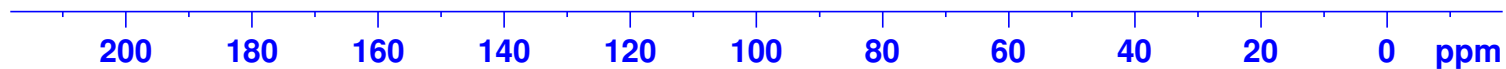

Supplement: Additional file 2 [file email_cyrMe2ROH_30mg_2_1.pdf › NMR files oxygen migration/12e/13C/pdata/1/email_cyrMe2ROH_30mg_2_1.pdf]
