# Supplementary material for: Skeletal rearrangement of 6,8-dioxabicyclo[3.2.1]octan-4-ols promoted by thionyl chloride or Appel conditions
Source: publisher site journal article supplement (doi:10.3762/bjoc.20.74), 2024-04-16

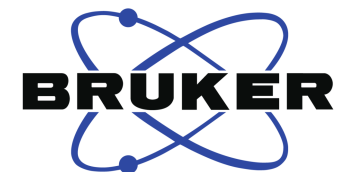

Current Data Parameters  
NAME       cyrstyOH\_2SOC125py\_fr2  
EXPNO       2  
PROCNO      1

F2 - Acquisition Parameters  
Date\_       20230916  
Time        16.35 h  
INSTRUM     spect  
PROBHD      Z124627\_0019 (  
PULPROG     zg30  
TD           65536  
SOLVENT     CDCl3  
NS           16  
DS           2  
SWH          10000.000 Hz  
FIDRES       0.305176 Hz  
AQ           3.2767999 sec  
RG           170.48  
DW           50.000 usec  
DE           13.08 usec  
TE           298.0 K  
D1           1.00000000 sec  
TD0          1  
SFO1         500.1630885 MHz  
NUC1         1H  
P0           4.92 usec  
P1           14.75 usec  
PLW1         11.00000000 W

F2 - Processing parameters  
SI           65536  
SF           500.1600000 MHz  
WDW          EM  
SSB          0  
LB           0.30 Hz  
GB           0  
PC           1.00

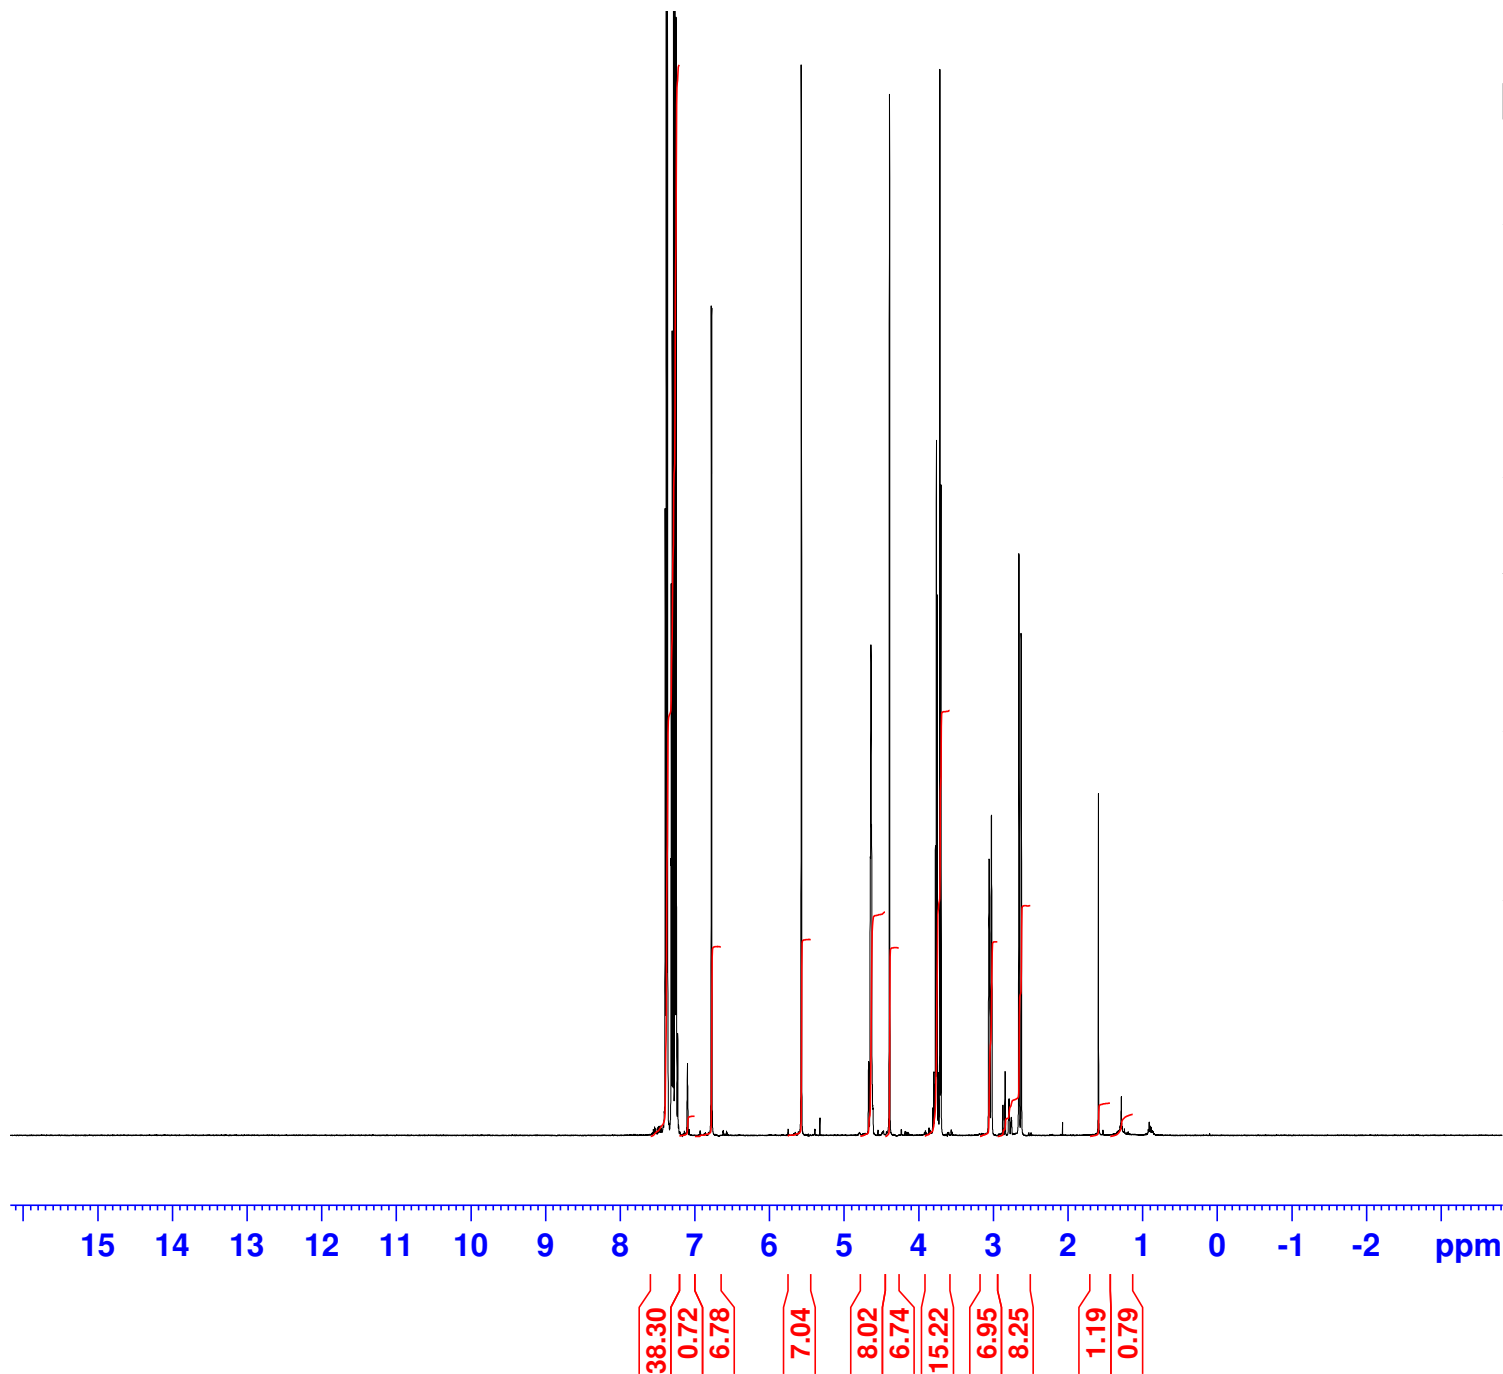

Supplement: Additional file 2 [file email_cyrstyOH_2SOCl25py_fr2_2_1.pdf › NMR files oxygen migration/20/1H/pdata/1/email_cyrstyOH_2SOCl25py_fr2_2_1.pdf]
