# Supplementary material for: Skeletal rearrangement of 6,8-dioxabicyclo[3.2.1]octan-4-ols promoted by thionyl chloride or Appel conditions
Source: publisher site journal article supplement (doi:10.3762/bjoc.20.74), 2024-04-16
Supplement: Additional file 2 [file HRMS 9d.pdf › NMR files oxygen migration/9d/HRMS 9d.pdf]

TIC from JK-Aux100-01.wiff (sample 1) - JK-Aux100-01, +TOF MS (230 - 270)

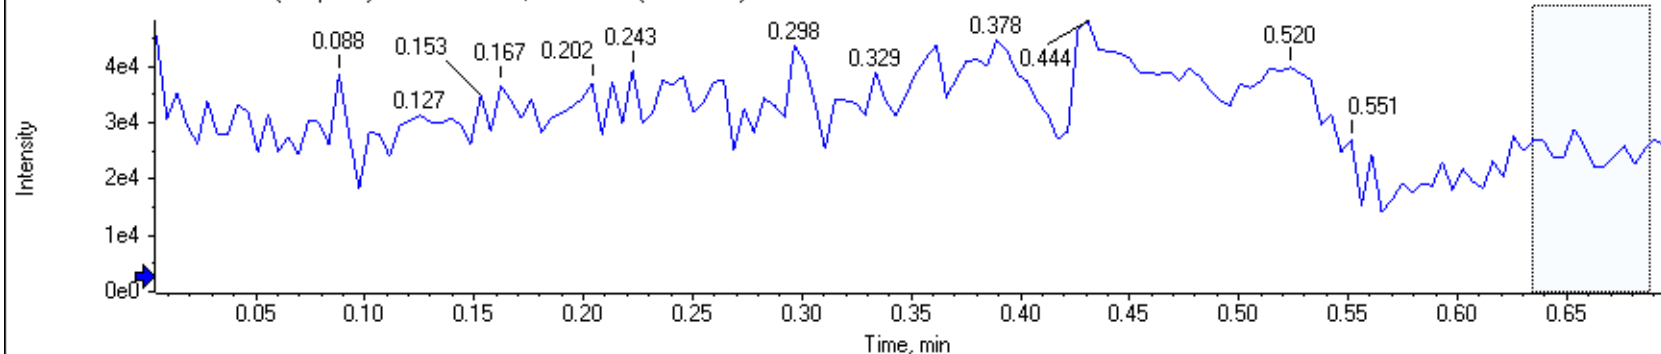

Spectrum from JK-Aux100-01.wiff (sample 1) - JK-Aux100-01, +TOF MS (230 - 270) from 0.635 to 0.686 min

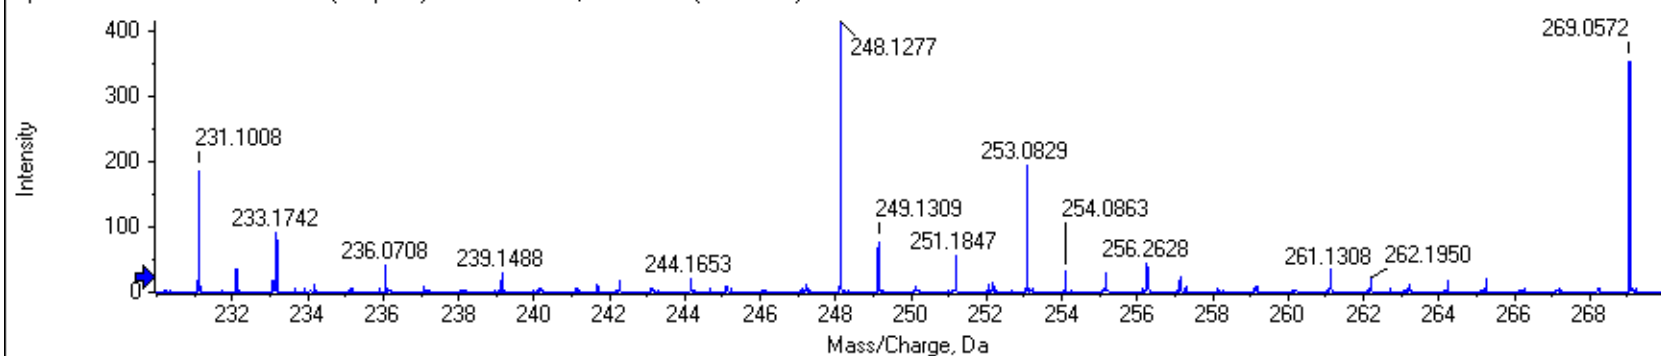

Mass Property AA Property **Mass Accuracy** Isotopic Distribution Elemental Composition Hypermass Unit Conversion Custom Elements AA Modifications

Measured m/z: 253.0829

Theoretical m/z: 253.0835

Error (mmu): -0.6

Error (ppm): -2.4
