# Supplementary material for: Skeletal rearrangement of 6,8-dioxabicyclo[3.2.1]octan-4-ols promoted by thionyl chloride or Appel conditions
Source: publisher site journal article supplement (doi:10.3762/bjoc.20.74), 2024-04-16
Supplement: Additional file 2 [file IR.pdf › NMR files oxygen migration/11c/IR.pdf]

Analyst  
Date

Student  
Saturday, 13 July 2019 7:35 PM

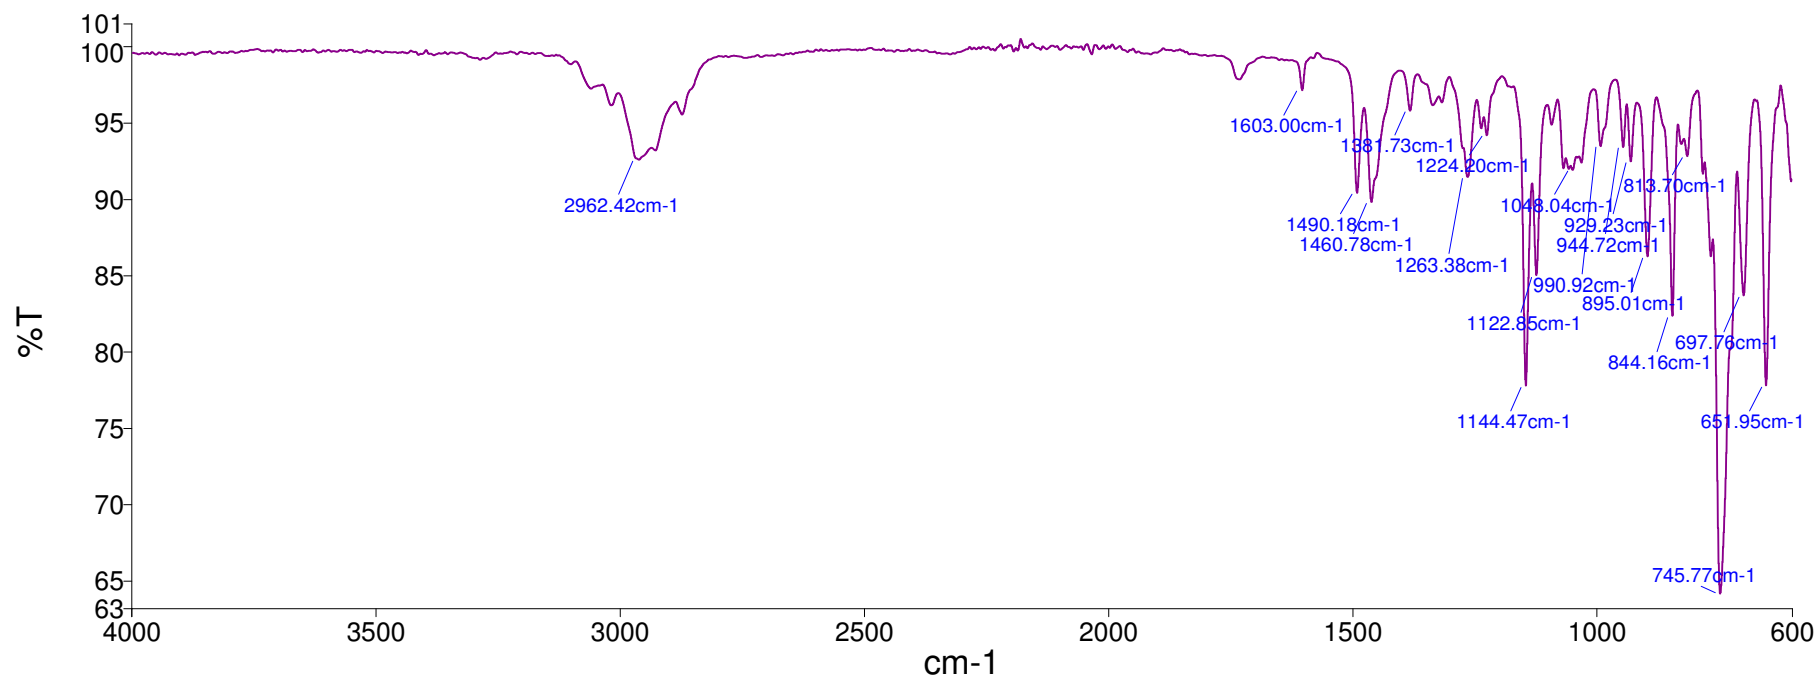

| Sample Name | Description | Quality Checks                                                |
|-------------|-------------|---------------------------------------------------------------|
| IR-ABC-OM-2 | 020         | The Quality Checks do not report any warnings for the sample. |
