# Supplementary material for: Skeletal rearrangement of 6,8-dioxabicyclo[3.2.1]octan-4-ols promoted by thionyl chloride or Appel conditions
Source: publisher site journal article supplement (doi:10.3762/bjoc.20.74), 2024-04-16
Supplement: Additional file 2 [file JK-Aux100-02-1-C1-t78-80_2_1.pdf › NMR files oxygen migration/10d/13C/pdata/1/JK-Aux100-02-1-C1-t78-80_2_1.pdf]

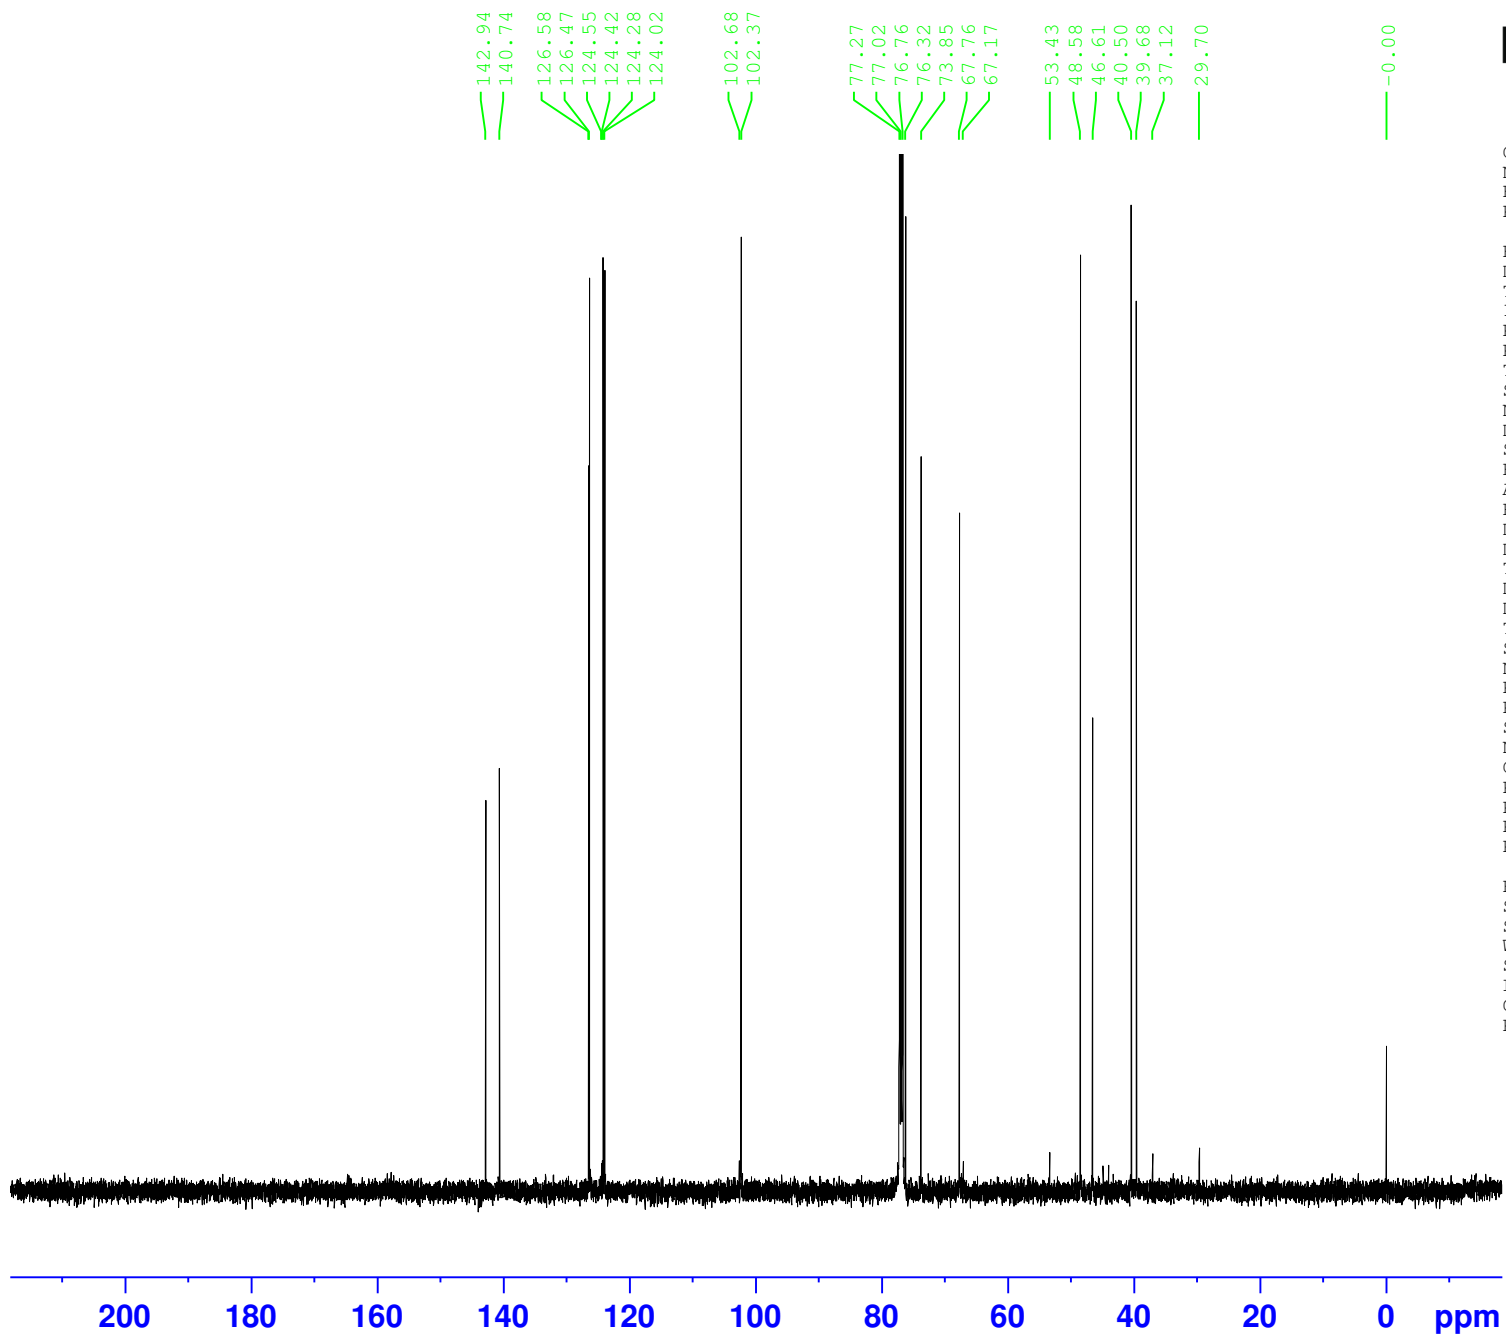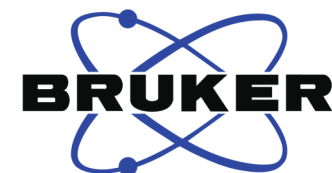

Current Data Parameters  
NAME JK-Aux100-02-1-C1-t78-80  
EXPNO 2  
PROCNO 1

F2 - Acquisition Parameters  
Date\_ 20180223  
Time 7.16 h  
INSTRUM spect  
PROBHD Z119470\_0196 (   
PULPROG zgpg30  
TD 65536  
SOLVENT CDCl3  
NS 3000  
DS 4  
SWH 29761.904 Hz  
FIDRES 0.908261 Hz  
AQ 1.1010048 sec  
RG 191.36  
DW 16.800 usec  
DE 6.50 usec  
TE 295.0 K  
D1 2.00000000 sec  
D11 0.03000000 sec  
TD0 1  
SFO1 125.7779086 MHz  
NUC1 13C  
P1 10.00 usec  
PLW1 78.00000000 W  
SFO2 500.1620006 MHz  
NUC2 1H  
CPDPRG[2] waltz16  
PCPD2 80.00 usec  
PLW2 22.00000000 W  
PLW12 0.35764000 W  
PLW13 0.17989001 W

F2 - Processing parameters  
SI 32768  
SF 125.7653337 MHz  
WDW EM  
SSB 0  
LB 1.00 Hz  
GB 0  
PC 1.40
