# Supplementary material for: Skeletal rearrangement of 6,8-dioxabicyclo[3.2.1]octan-4-ols promoted by thionyl chloride or Appel conditions
Source: publisher site journal article supplement (doi:10.3762/bjoc.20.74), 2024-04-16

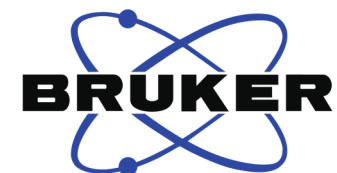

Current Data Parameters  
NAME JP-Aux01-01-aftercolumn  
EXPNO 1  
PROCNO 1

F2 - Acquisition Parameters  
Date\_ 20180302  
Time 18.18 h  
INSTRUM spect  
PROBHD Z119470\_0196 (  
PULPROG zg30  
TD 65536  
SOLVENT CDCl3  
NS 16  
DS 2  
SWH 10000.000 Hz  
FIDRES 0.305176 Hz  
AQ 3.2767999 sec  
RG 70.1  
DW 50.000 usec  
DE 6.50 usec  
TE 295.0 K  
D1 1.00000000 sec  
TD0 1  
SFO1 500.1630885 MHz  
NUC1 1H  
P1 10.20 usec  
PLW1 22.00000000 W

F2 - Processing parameters  
SI 65536  
SF 500.1600539 MHz  
WDW EM  
SSB 0  
LB 0.30 Hz  
GB 0  
PC 1.00

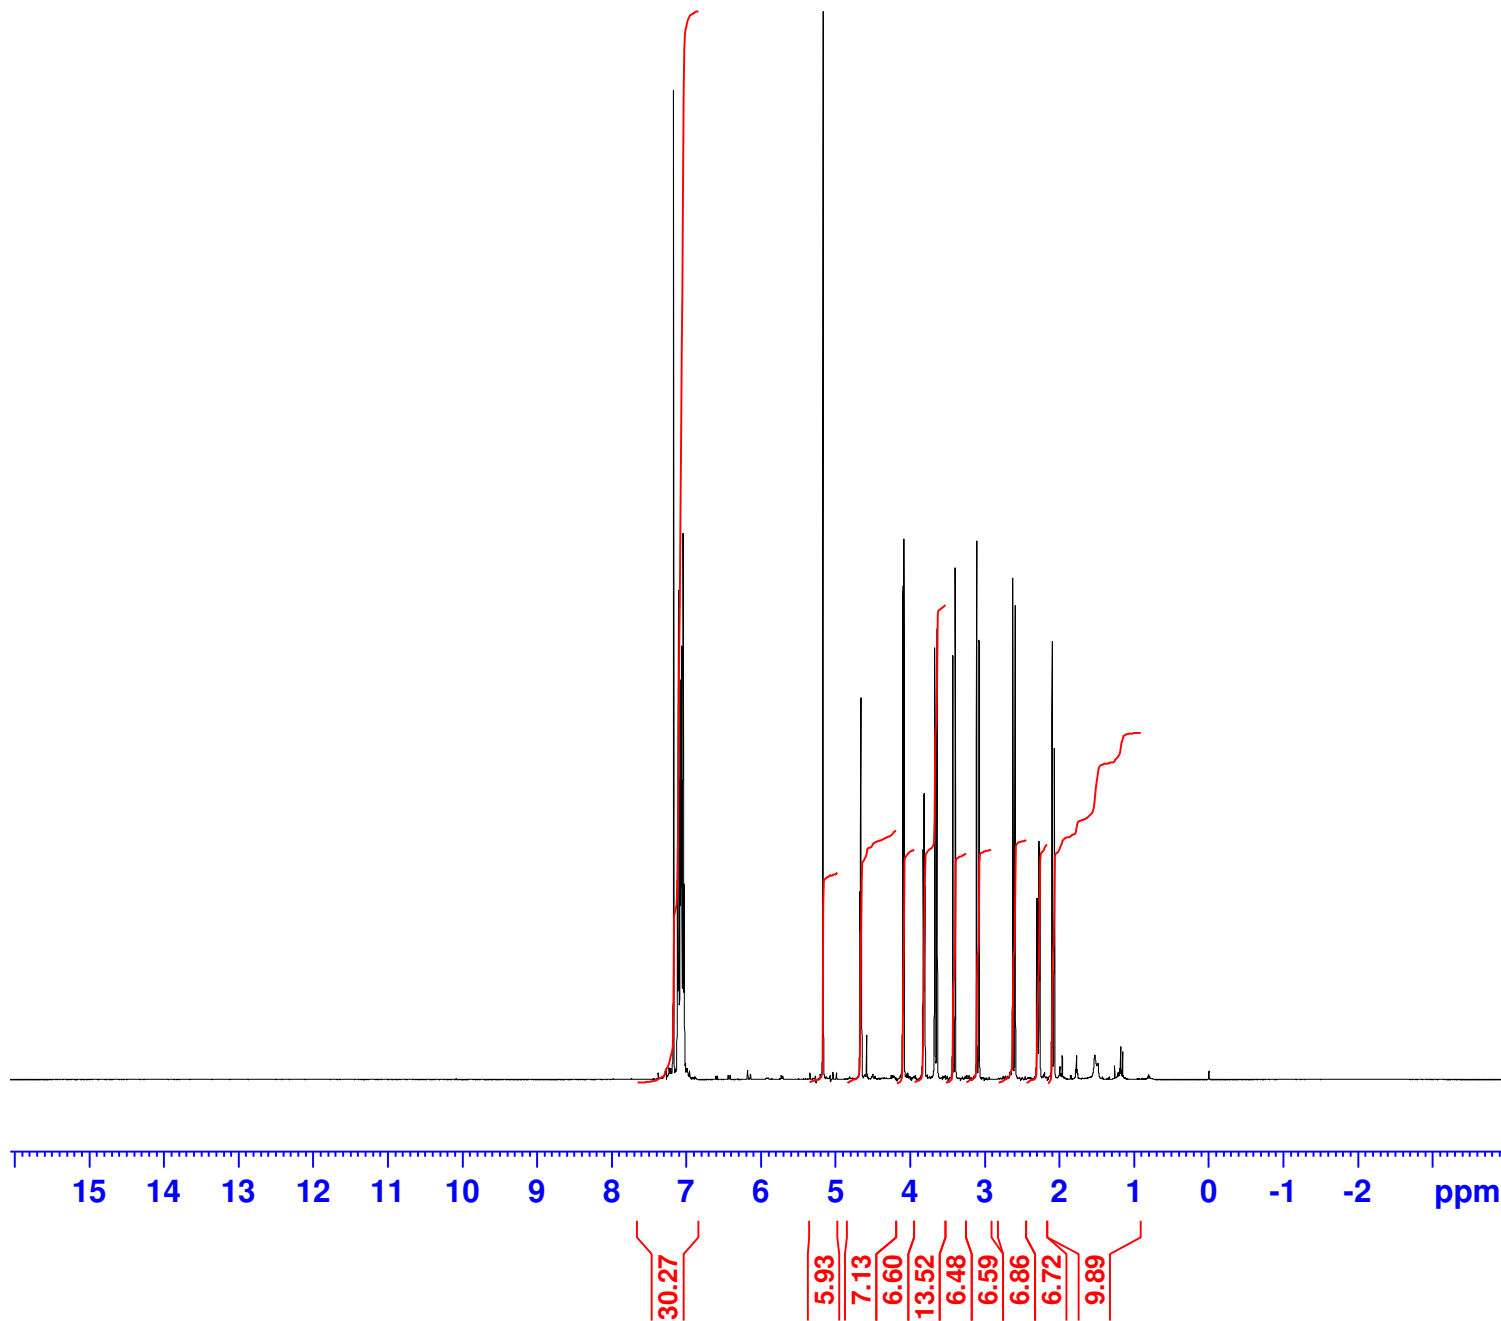

Supplement: Additional file 2 [file JP-Aux01-01-aftercolumn_1_1.pdf › NMR files oxygen migration/9d/1H/pdata/1/JP-Aux01-01-aftercolumn_1_1.pdf]
