# Supplementary figures and images for: Skeletal rearrangement of 6,8-dioxabicyclo[3.2.1]octan-4-ols promoted by thionyl chloride or Appel conditions
Source: publisher site journal article supplement (doi:10.3762/bjoc.20.74), 2024-04-16

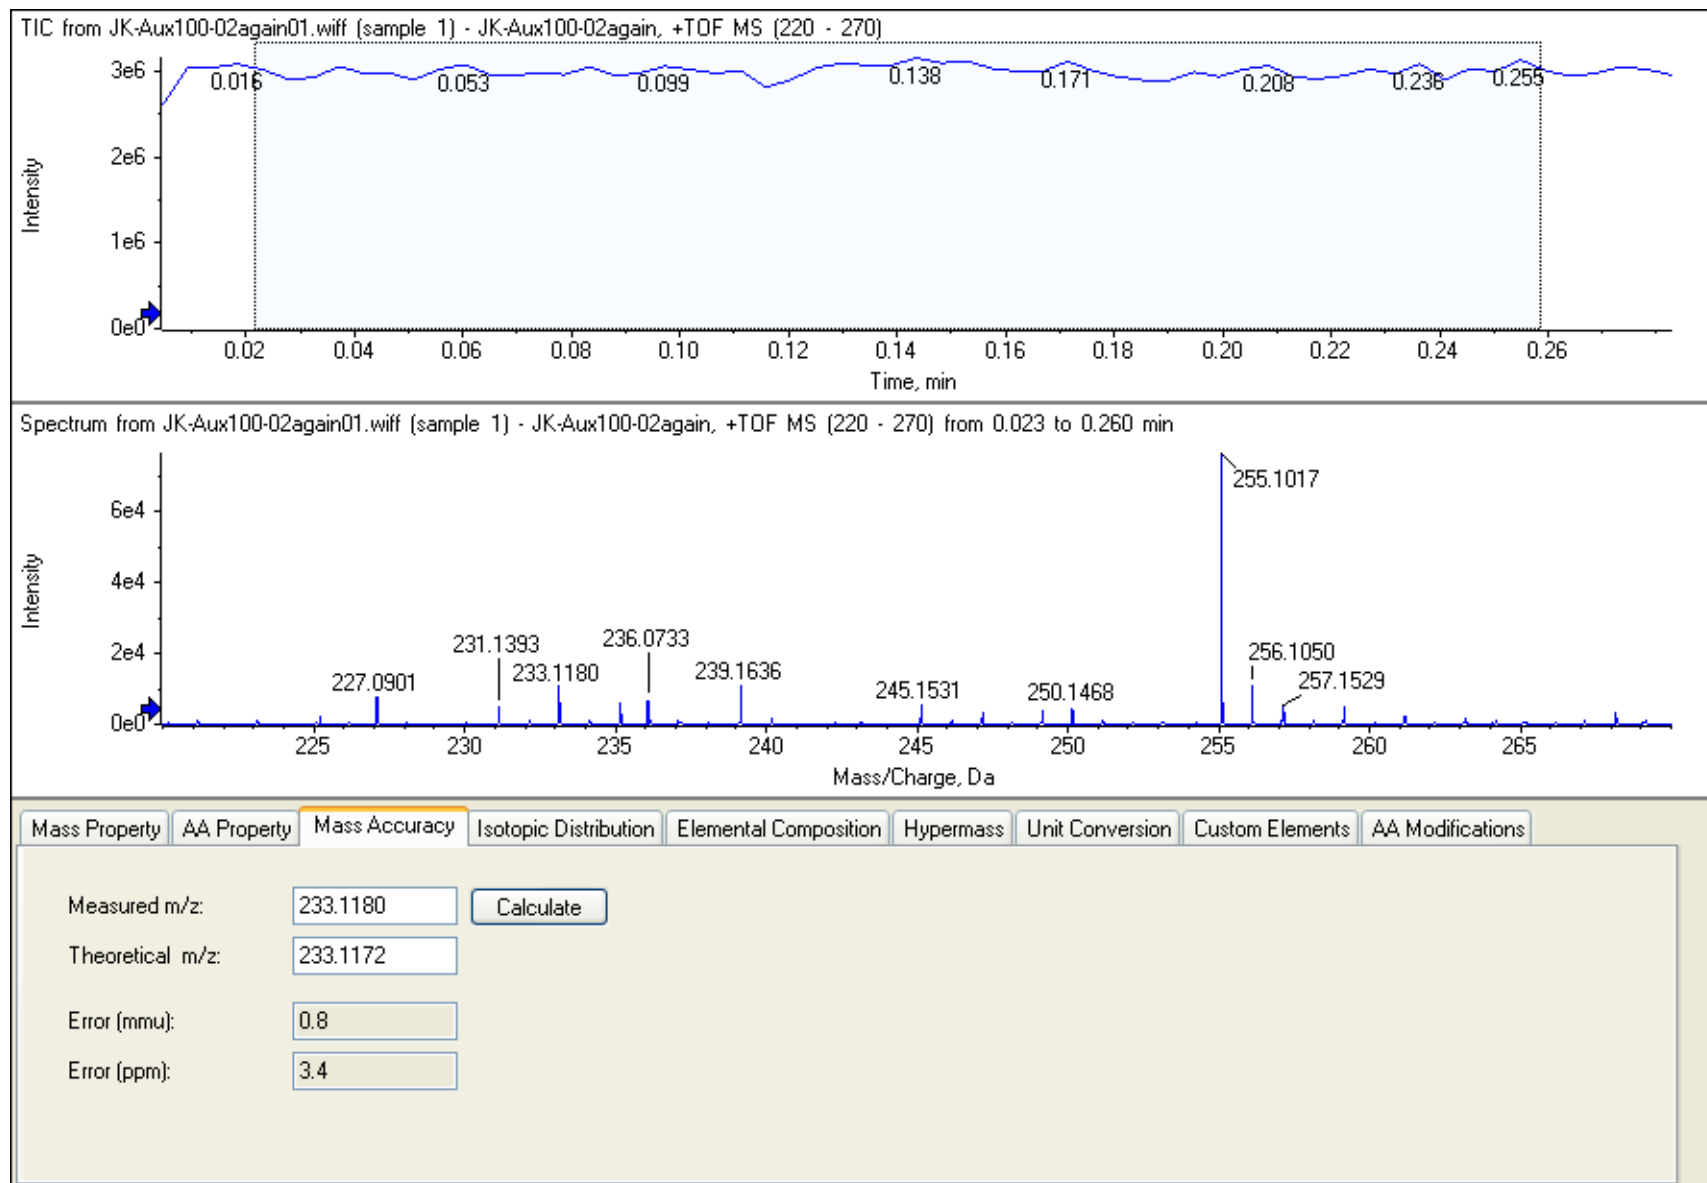

Supplement: Additional file 2 [file HRMS 10d.pdf › NMR files oxygen migration/10d/HRMS 10d.pdf]

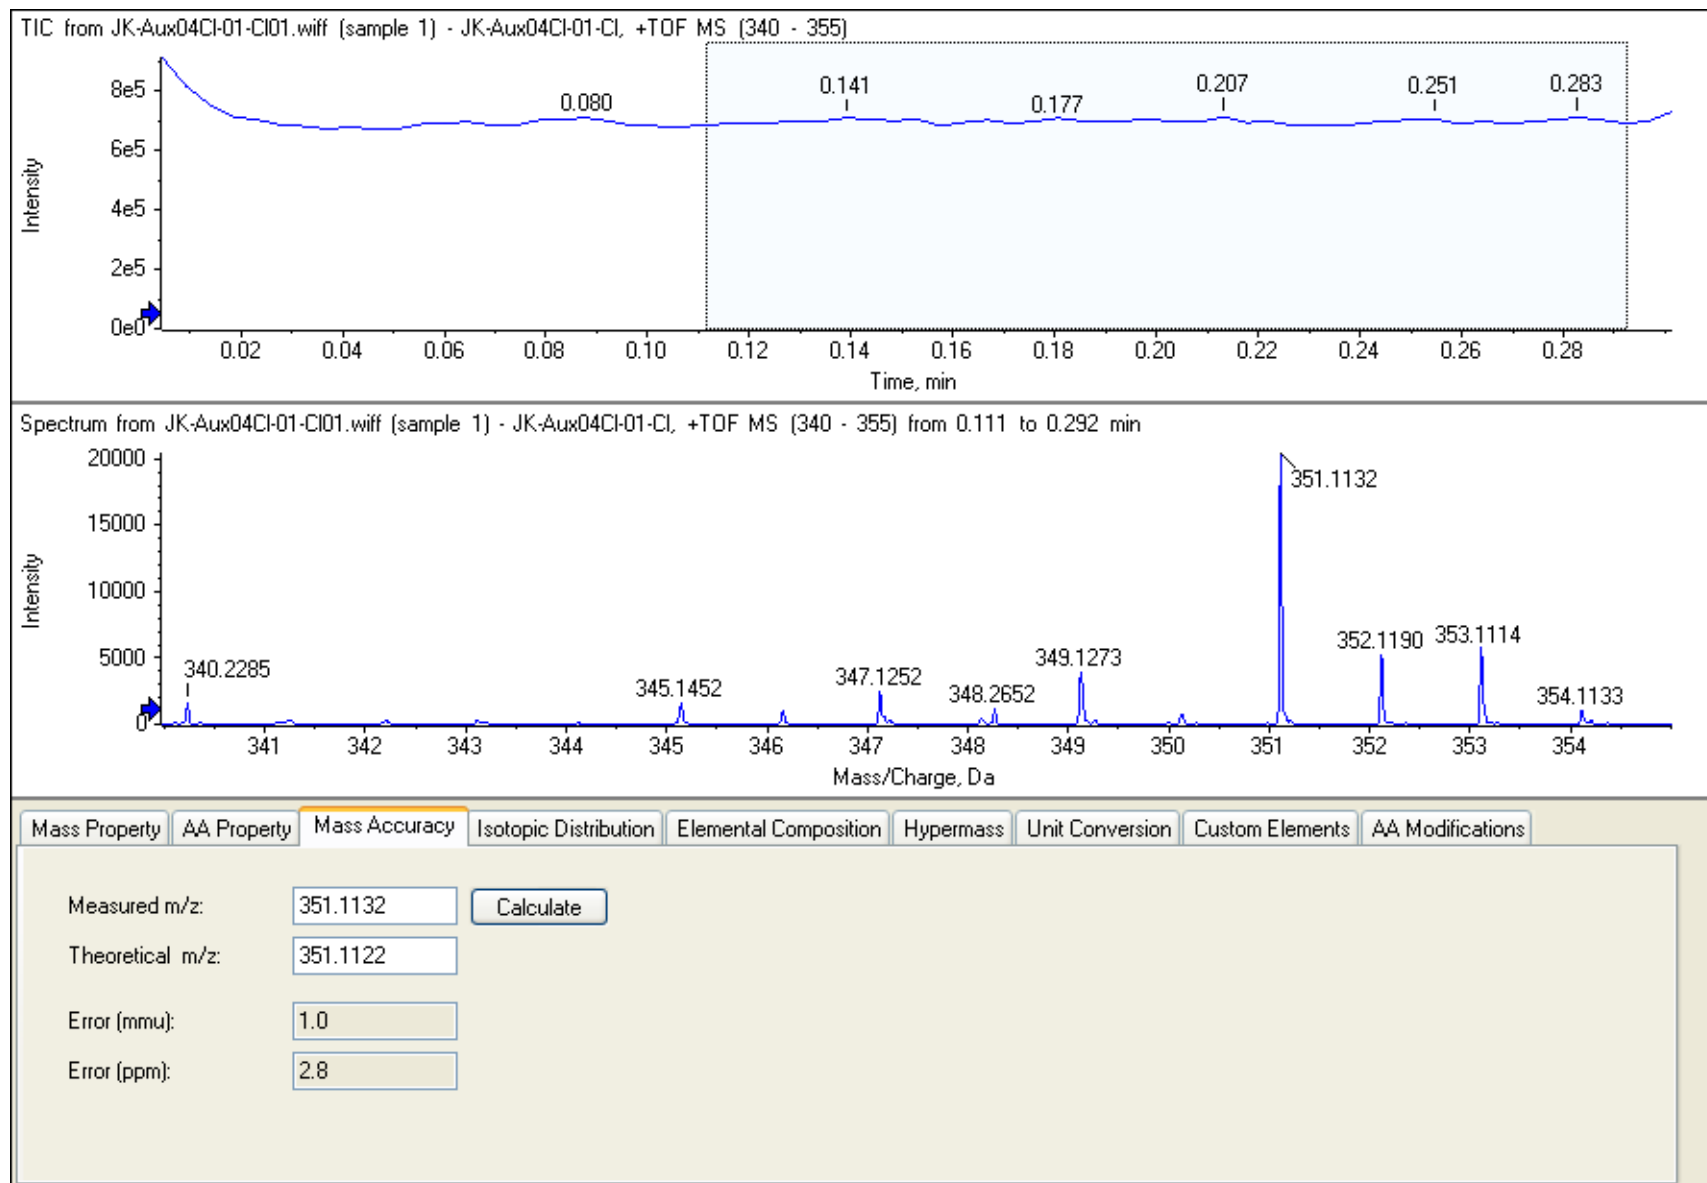

Supplement: Additional file 2 [file HRMS 11a.pdf › NMR files oxygen migration/11a/HRMS 11a.pdf]

## MS Spectrum

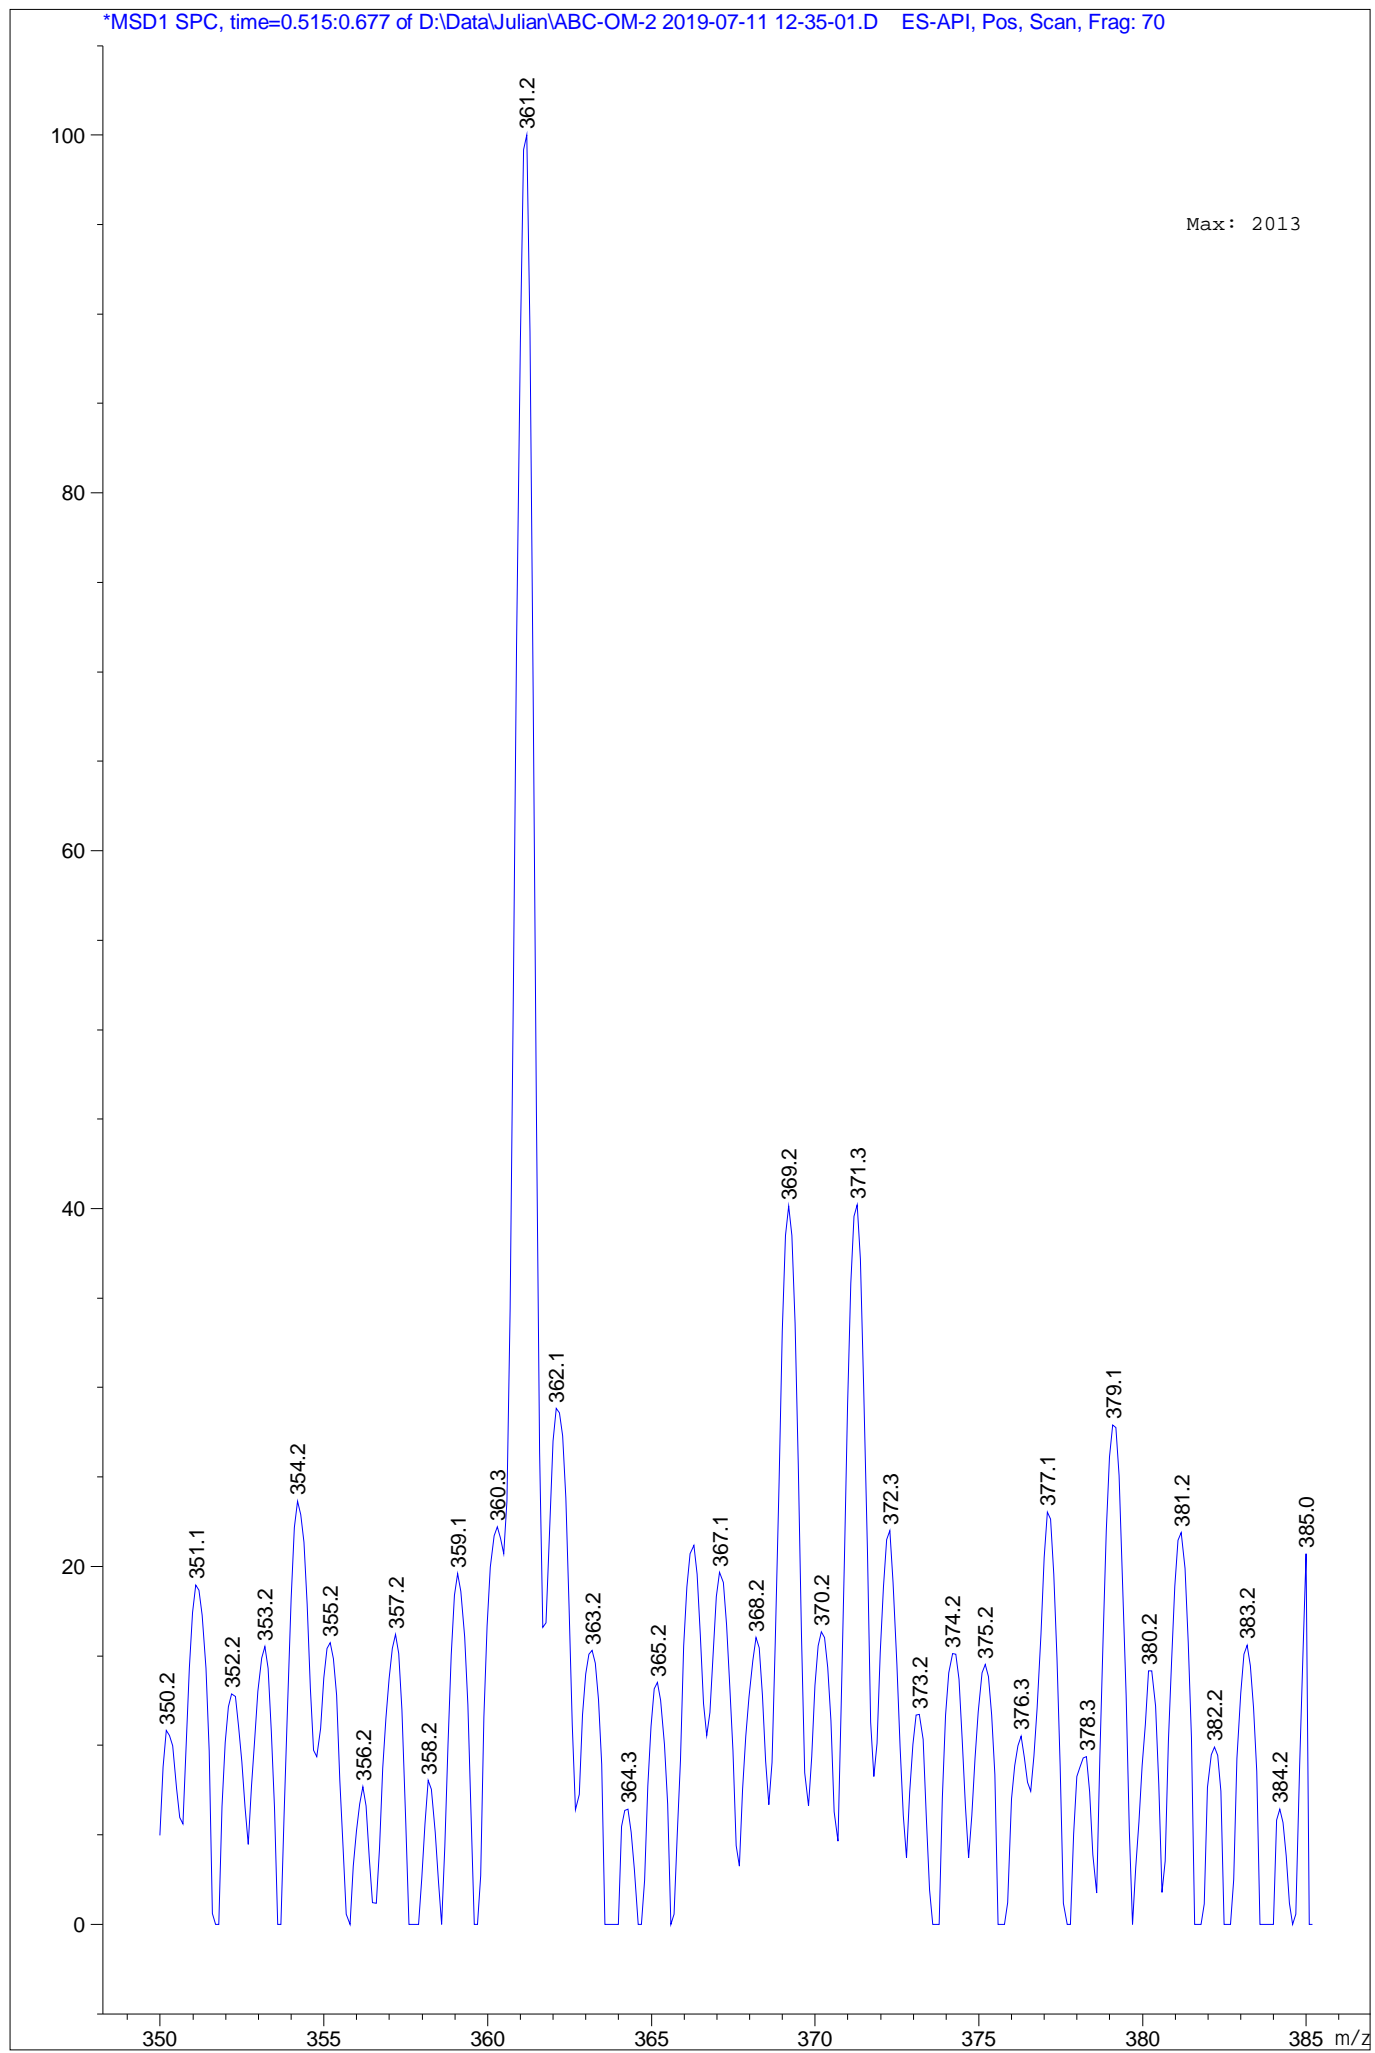

Supplement: Additional file 2 [file ESIMS.pdf › NMR files oxygen migration/11c/ESIMS.pdf]
